# Supplementary material for: An atlas of the binding specificities of transcription factors in Pseudomonas aeruginosa directs prediction of novel regulators in virulence
Source: eLife. 2021 Mar 29;10:e61885. doi: 10.7554/eLife.61885 (PMC8041468; doi:10.7554/eLife.61885)
Supplement: Figure 2—figure supplement 4—source data 1. [file elife-61885-fig2-figsupp4-data1.xlsx]

## Sheet: Sheet1
Strain	Wild type			∆PA0032			∆PA0048			∆PA0120			∆PA0191			∆PA0236			∆creB			∆PA0491			∆PA0547			∆PA0784			∆PA0791			∆PA0839			∆PA0864			∆fleQ			∆fleR			∆PA1235			∆PA1241
OD590	1.333	1.465	1.26	1.177	1.489	1.318	1.212	1.21	1.398	1.215	1.22	1.342	1.671	1.675	1.589	1.139	1.408	1.459	1.144	1.396	1.14	0.839	0.932	0.922	1.259	1.294	1.328	1.818	1.782	1.628	1.267	1.645	1.525	1.215	1.508	1.623	1.579	1.593	1.4	0.8	0.977	0.815	1.114	1.74	1.403	1.38	1.653	1.359	1.122
[truncated: 113 more columns]
