# Supplementary material for: An atlas of the binding specificities of transcription factors in Pseudomonas aeruginosa directs prediction of novel regulators in virulence
Source: eLife. 2021 Mar 29;10:e61885. doi: 10.7554/eLife.61885 (PMC8041468; doi:10.7554/eLife.61885)
Supplement: Figure 2—source data 1. [file elife-61885-fig2-data1.xlsx]

## Sheet: Figure 2A
PWM Length (bp)	Number of nodes
1	0
2	0
3	0
4	0
5	0
6	0
7	0
8	0
9	1
10	7
11	9
12	13
13	9
14	20
15	30
16	32
17	23
18	20
19	11
20	9
21	8
22	2
23	3
24	1
25	0
26	1
27	1
28	1
29	0
30	0
