# Supplementary material for: An atlas of the binding specificities of transcription factors in Pseudomonas aeruginosa directs prediction of novel regulators in virulence
Source: eLife. 2021 Mar 29;10:e61885. doi: 10.7554/eLife.61885 (PMC8041468; doi:10.7554/eLife.61885)
Supplement: Figure 2—source data 2. [file elife-61885-fig2-data2.xlsx]

## Sheet: Figure 2C
TF	Hits
PA0120	2407
PA3782	2353
PA1142	2293
PA0048	1984
PA3757	1796
PA4184	1449
PA1241	1177
PA5324	1075
PA4547	955
PA1141	912
PA2681	892
PA2588	778
PA1315	756
PA0739	670
PA1099	669
PA0294	539
PA5483	527
PA0791	467
PA2267	412
PA2510	398
PA1201	321
PA2489	316
PA4906	315
PA4462	313
PA0032	290
PA5125	259
PA0864	253
PA3385	247
PA5059	221
PA1226	220
PA2258	218
PA4135	217
PA0839	215
PA2259	200
PA2879	199
PA2028	196
PA4659	195
PA1980	185
PA4203	185
PA1864	184
PA0479	169
PA1630	166
PA3225	166
PA1526	158
PA5261	157
PA0547	150
PA0236	145
PA2492	136
PA3458	131
PA2846	130
PA3895	129
PA4989	129
PA0535	128
PA0784	127
PA3135	126
PA3249	122
PA1196	118
PA1399	112
PA0491	111
PA2809	111
PA3864	109
PA0225	108
PA1826	108
PA2497	108
PA2586	100
PA1603	98
PA2802	90
PA4120	90
PA2758	87
PA0181	85
PA1437	82
PA2376	82
PA2519	82
PA2121	81
PA3184	80
PA0037	79
PA1235	78
PA1431	67
PA4726	67
PA3133	64
PA3398	64
PA2118	58
PA1599	54
PA4508	49
PA2206	48
PA1097	47
PA2534	46
PA0477	45
PA3879	45
PA0906	44
PA4101	41
PA5360	41
PA2897	40
PA4984	40
PA4902	39
PA2479	38
PA5189	35
PA2838	34
PA3771	33
PA0268	32
PA5293	32
PA0463	30
PA1269	30
PA2383	30
PA2005	29
PA2657	29
PA0436	28
PA1223	28
PA2334	28
PA3594	28
PA5200	26
PA3077	25
PA0248	24
PA3204	24
PA1704	23
PA3995	23
PA1713	21
PA2354	21
PA2359	21
PA3341	21
PA4315	20
PA1945	19
PA2316	19
PA3192	19
PA3630	19
PA1145	18
PA1520	18
PA0191	17
PA1738	17
PA4288	17
PA0652	16
PA1413	16
PA2100	16
PA4581	16
PA0708	15
PA1760	15
PA5403	15
PA1290	14
PA1627	14
PA4600	14
PA1264	13
PA1430	13
PA1637	13
PA2877	13
PA3381	13
PA4032	13
PA4769	13
PA1754	12
PA2337	12
PA4227	12
PA4787	12
PA4987	12
PA0123	11
PA1359	11
PA0159	10
PA0828	10
PA1128	10
PA3006	10
PA3034	10
PA4776	10
PA1490	9
PA2469	9
PA4499	9
PA0564	8
PA1397	8
PA1570	8
PA4983	8
PA5499	8
PA5511	8
PA1328	6
PA4021	6
PA4436	6
PA0528	5
PA3067	5
PA0275	4
PA0929	4
PA1799	4
PA1884	4
PA3778	2
PA2332	1
PA2220	0
PA2921	0
