# Supplementary material for: An atlas of the binding specificities of transcription factors in Pseudomonas aeruginosa directs prediction of novel regulators in virulence
Source: eLife. 2021 Mar 29;10:e61885. doi: 10.7554/eLife.61885 (PMC8041468; doi:10.7554/eLife.61885)
Supplement: Figure 3—source data 1. [file elife-61885-fig3-data1.xlsx]

## Sheet: Figure 3C
	rpsL			pelA			∆Ct			∆∆Ct			2^-∆∆Ct
WT	20.7364	20.5984	20.2161	24.6539	24.7326	24.3903	-3.91749	-4.13429	-4.17414	0.026372	0.0404799	-0.0645823	0.981886	0.972331	1.04578
∆PA0225	20.1006	20.3089	20.993	25.9159	26.237	27.0012	-5.81536	-5.92817	-6.0082	1.89787	1.79389	1.83406	0.268339	0.288394	0.280475
∆PA0225/PA0225	20.7481	20.5644	20.3212	24.0113	23.9102	23.6298	-3.26319	-3.3458	-3.30862	-0.654305	-0.788489	-0.865519	1.57386	1.72726	1.82199
