# Supplementary material for: An atlas of the binding specificities of transcription factors in Pseudomonas aeruginosa directs prediction of novel regulators in virulence
Source: eLife. 2021 Mar 29;10:e61885. doi: 10.7554/eLife.61885 (PMC8041468; doi:10.7554/eLife.61885)
Supplement: Figure 3—source data 2. [file elife-61885-fig3-data2.xlsx]

## Sheet: Figure 3F
Strains	OD590		OD600		OD590/OD600		SD	P value
WT	0.858	0.904	0.965	0.972	0.889119	0.930041	0.0289362	/
∆PA0225	0.264	0.305	0.996	1.024	0.26506	0.297852	0.023187	0.00173792
∆PA0225/PA0225	1.482	1.371	0.986	1.061	1.50304	1.29218	0.149104	0.0451736
