# Supplementary material for: An atlas of the binding specificities of transcription factors in Pseudomonas aeruginosa directs prediction of novel regulators in virulence
Source: eLife. 2021 Mar 29;10:e61885. doi: 10.7554/eLife.61885 (PMC8041468; doi:10.7554/eLife.61885)
Supplement: Figure 4—source data 1. [file elife-61885-fig4-data1.xlsx]

## Sheet: Figure 4C
	rpsL		qslA		∆Ct		∆∆Ct		2^-∆∆Ct
WT	20.7403	20.7936	24.6539	24.7326	-3.91361	-3.93901	0.0334428	-0.0326851	0.977086	1.02291
∆PA2497	19.9845	19.9803	24.9209	24.9761	-4.93638	-4.99579	1.02277	1.05679	0.492171	0.480702
∆PA2497/PA2497	19.7429	19.9018	23.6647	23.6999	-3.92175	-3.79808	0.00813728	-0.140929	0.994376	1.10261
