# Supplementary material for: An atlas of the binding specificities of transcription factors in Pseudomonas aeruginosa directs prediction of novel regulators in virulence
Source: eLife. 2021 Mar 29;10:e61885. doi: 10.7554/eLife.61885 (PMC8041468; doi:10.7554/eLife.61885)
Supplement: Figure 4—source data 2. [file elife-61885-fig4-data2.xlsx]

## Sheet: Figure 4D
	rpsL		phzH		∆Ct		∆∆Ct		2^-∆∆Ct
WT	19.7403	19.7902	24.6539	24.7326	-4.91361	-4.9424	0.06458	-0.06458	0.956224	1.04578
∆PA1413	19.9959	19.956	25.8717	26.0909	-5.87574	-6.13489	0.962132	1.19249	0.513298	0.437546
∆PA1413/PA1413	19.7429	19.9018	23.9948	23.8745	-4.25188	-3.97273	-0.661732	-0.969666	1.58198	1.95839
