# Supplementary material for: An atlas of the binding specificities of transcription factors in Pseudomonas aeruginosa directs prediction of novel regulators in virulence
Source: eLife journal article supplement (doi:10.7554/elife.61885), 2021-03-29
Supplement: supp3 [file elife-61885-supp3-v2.pdf]

## Supplementary File 3

The 104 distinct modules of the obtained 198 PWMs for 182 TFs. Diamonds indicate TFs, circles indicate individual PWMs. The dashed lines show the motif of the TF. The TFs without names are named with their locus tag omitting "PA".

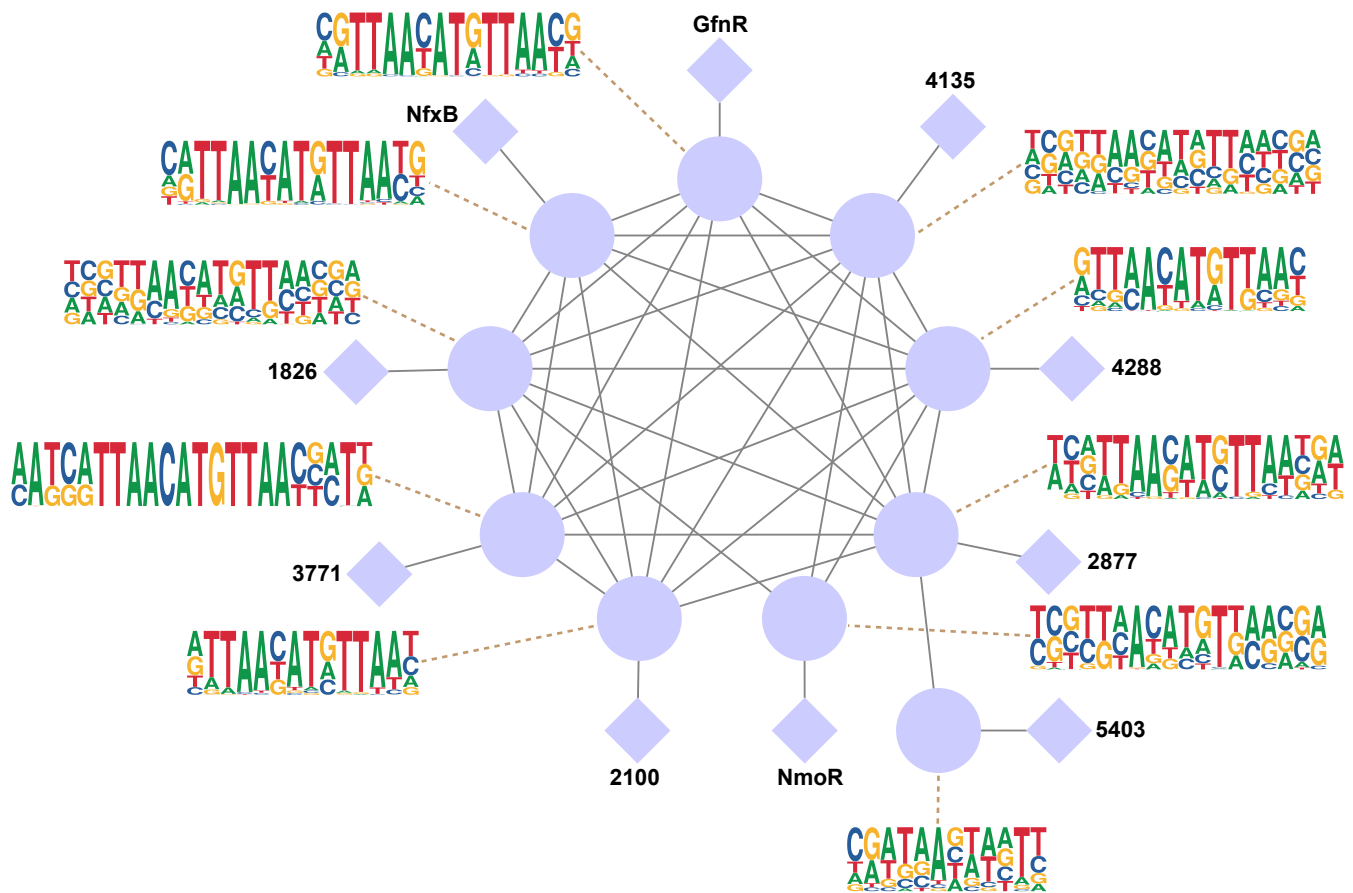

Module 1

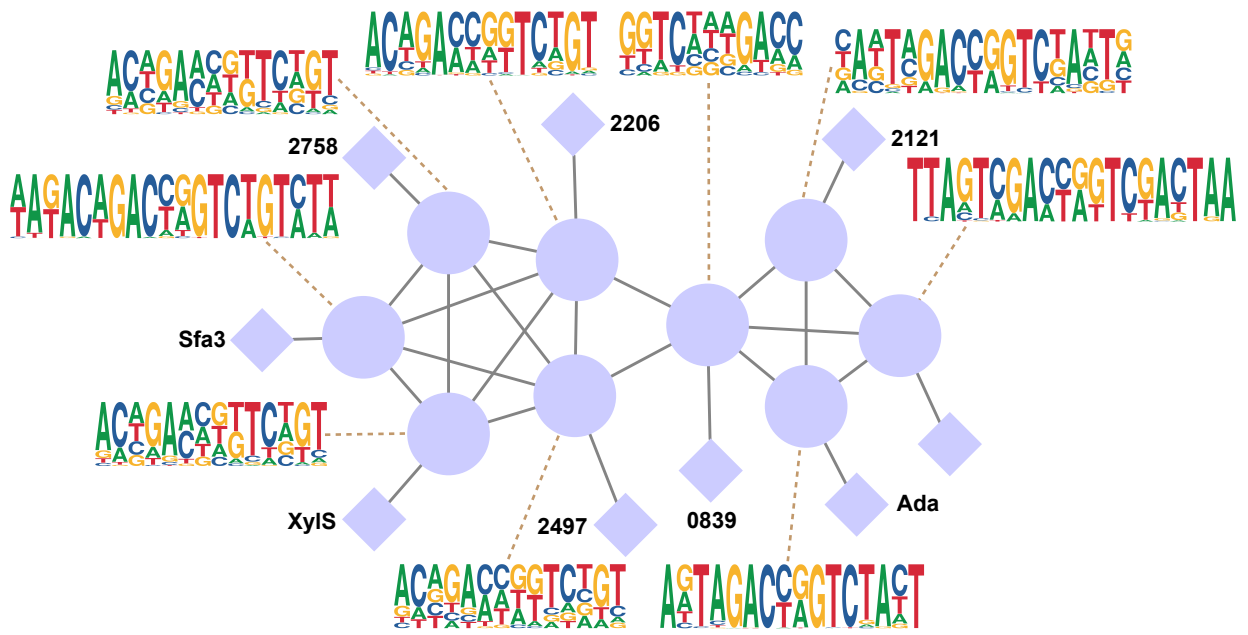

Module 2

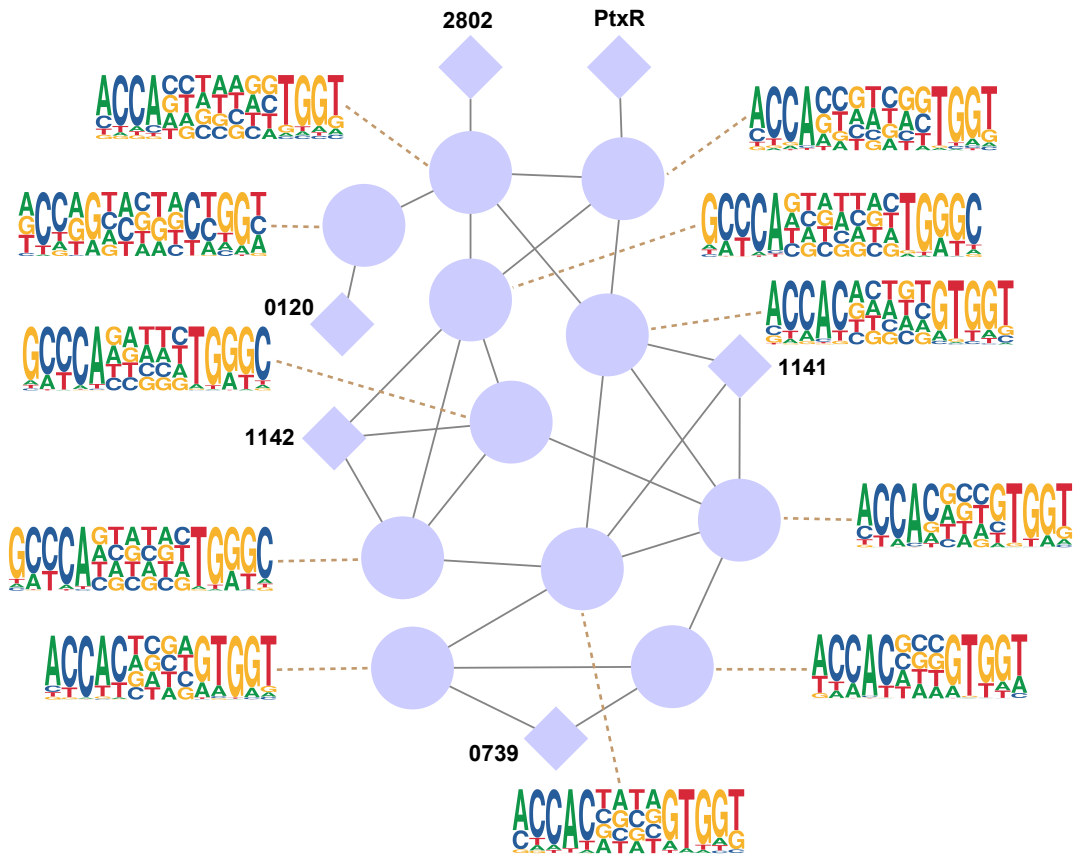

Module 3

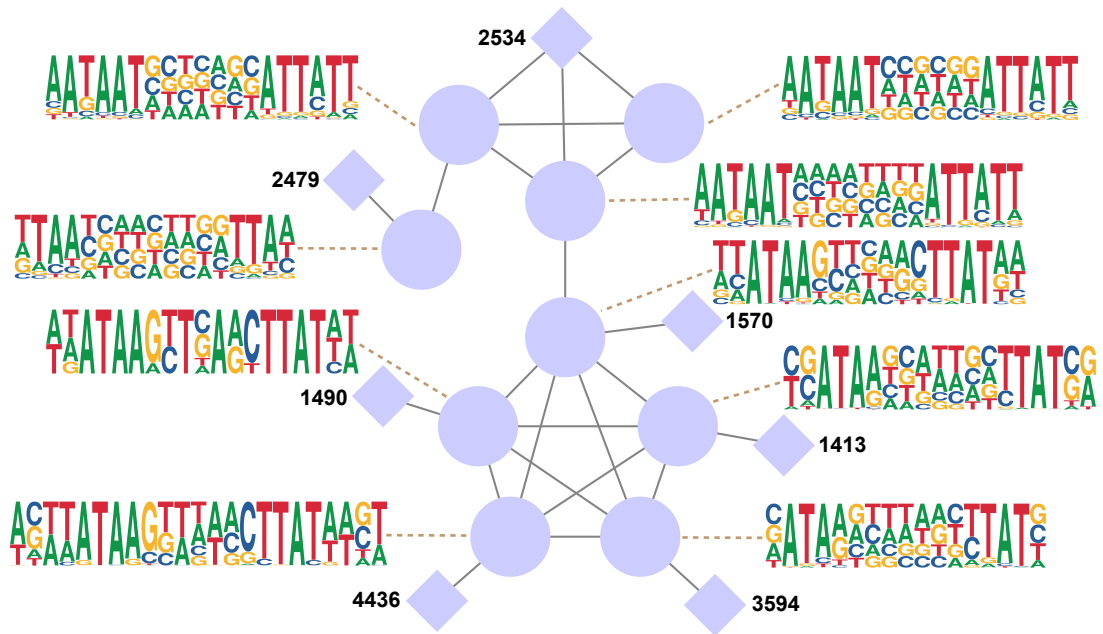

Module 4

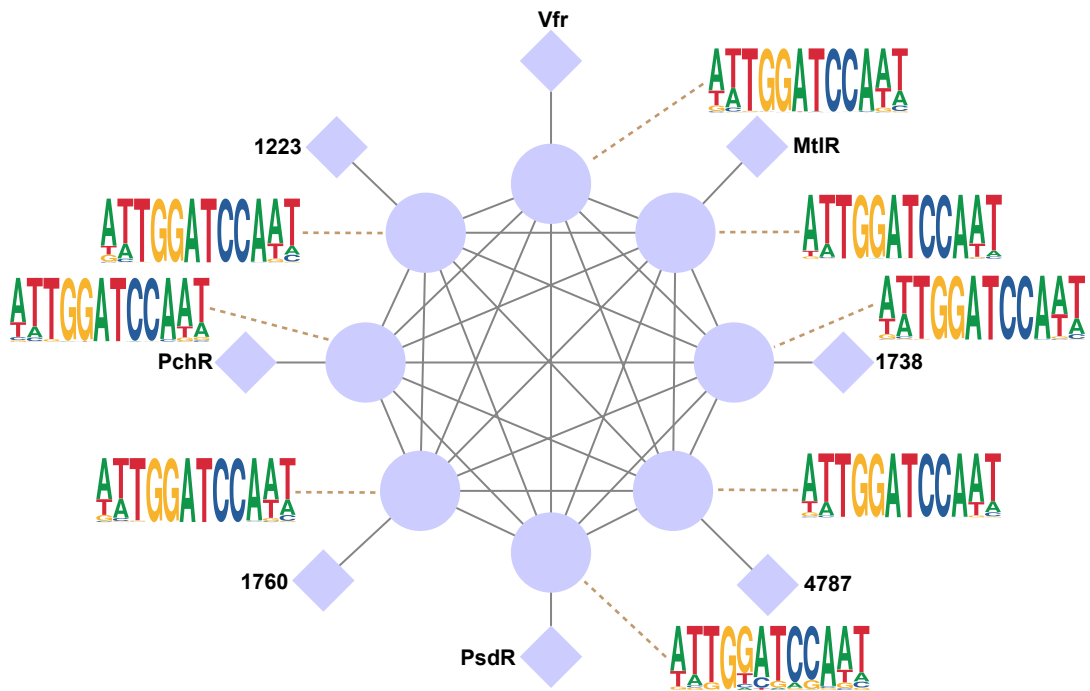

Module 5

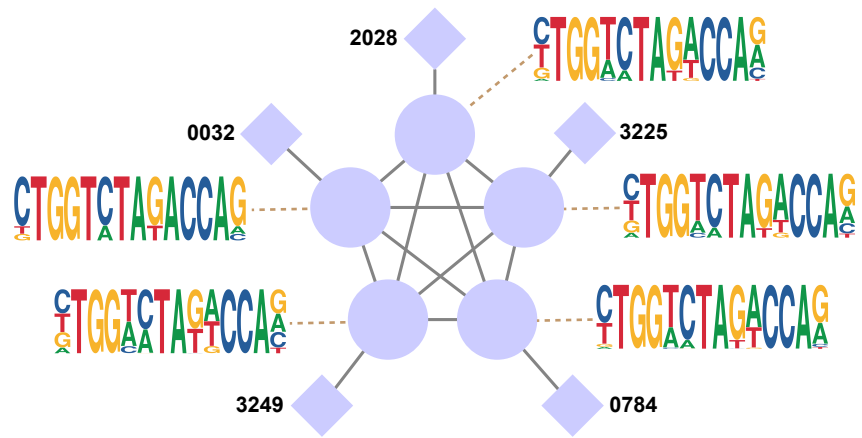

Module 6

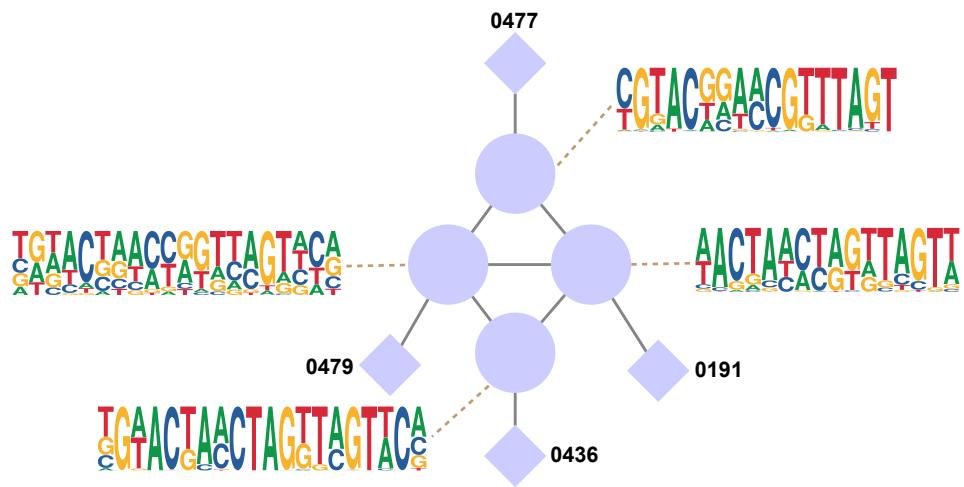

Module 7

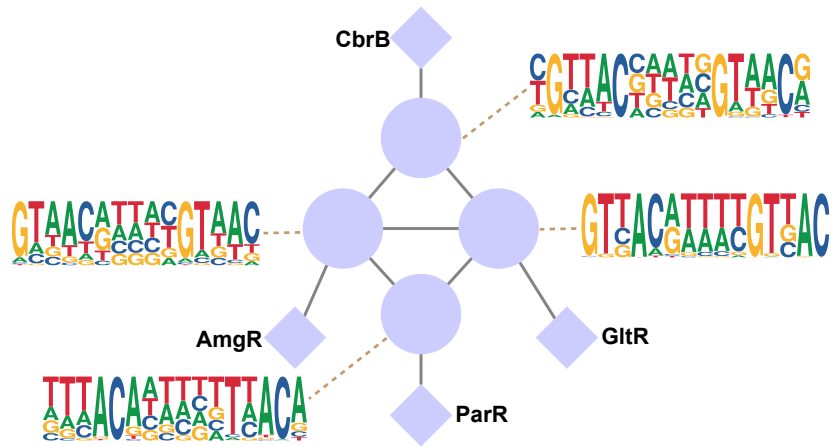

Module 8



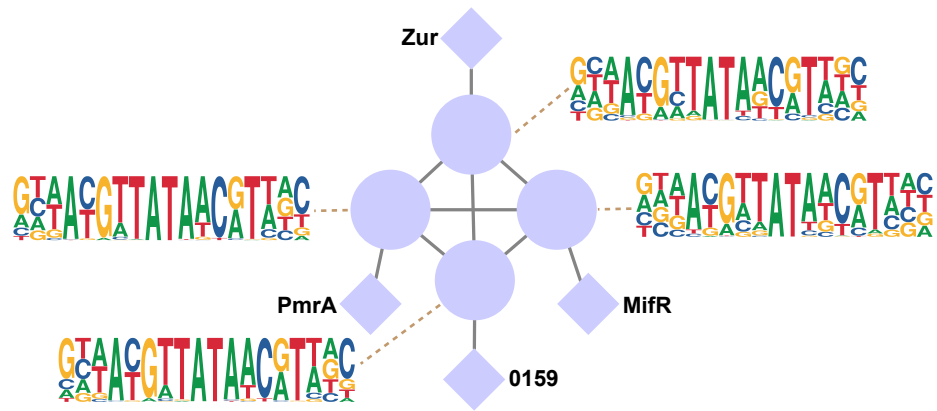

**Module 9**

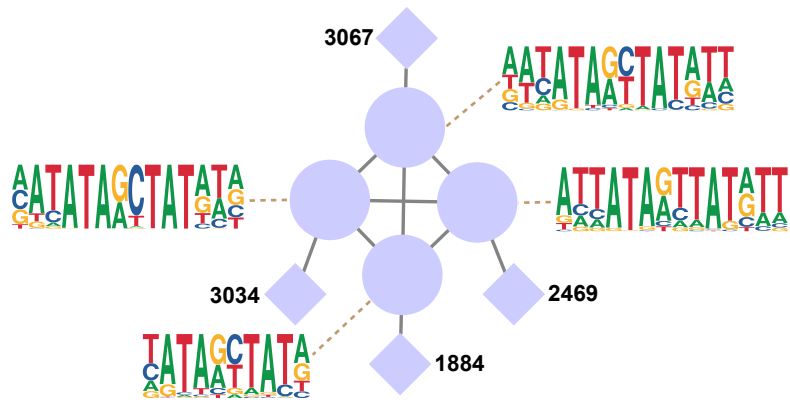

**Module 10**

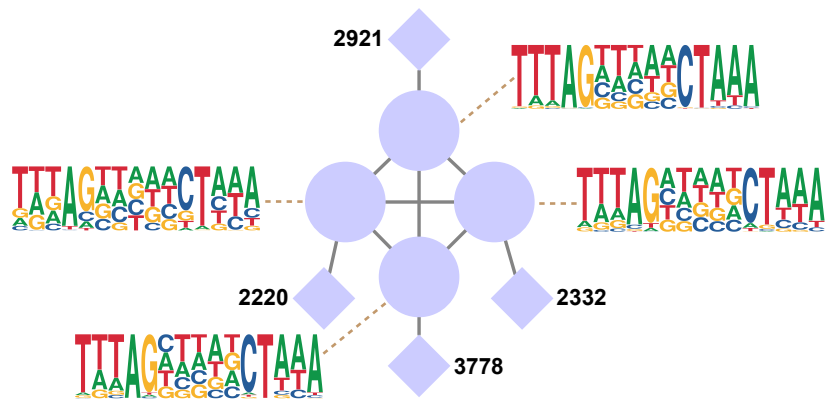

**Module 11**

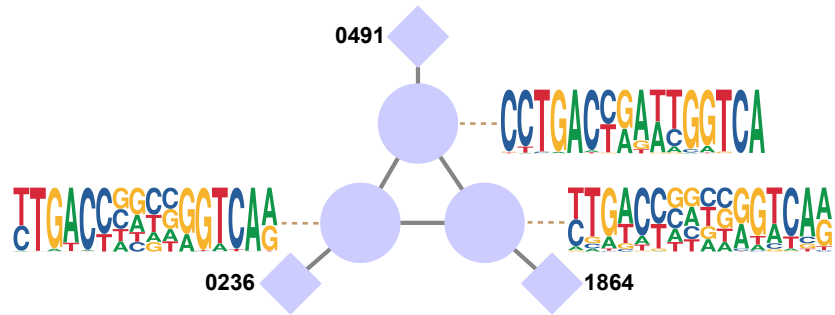

Module 12

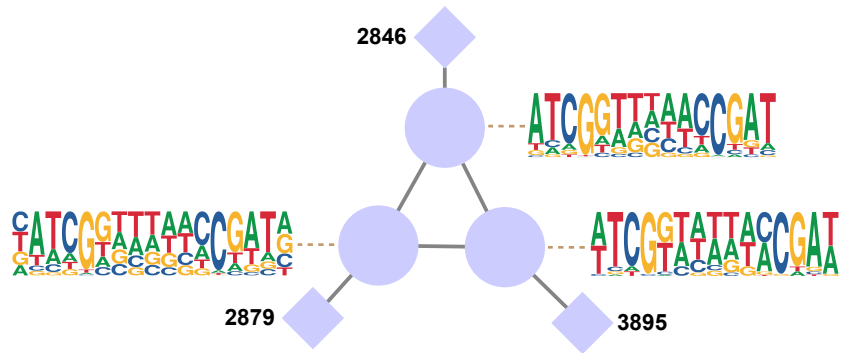

Module 13

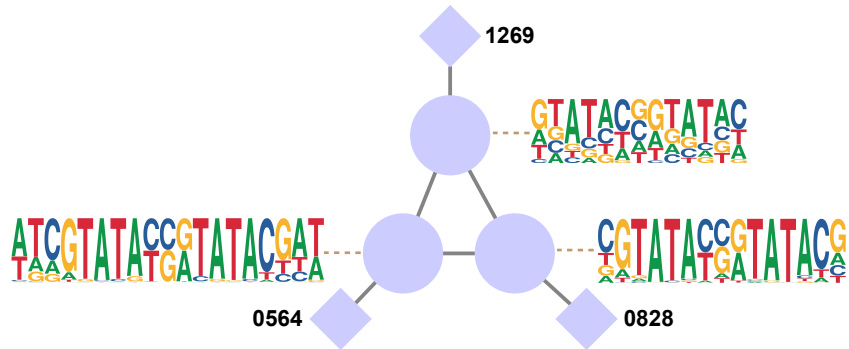

Module 14

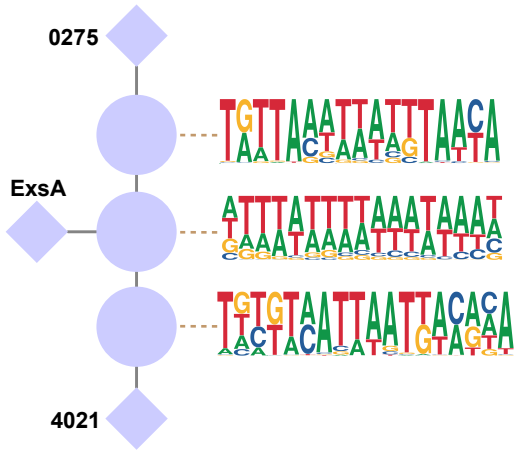

**Module 15**

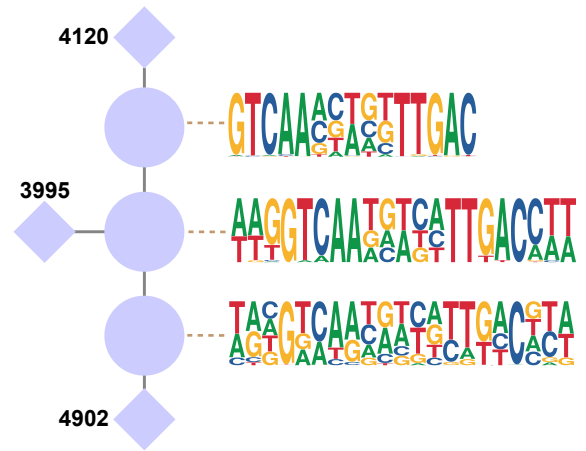

**Module 16**

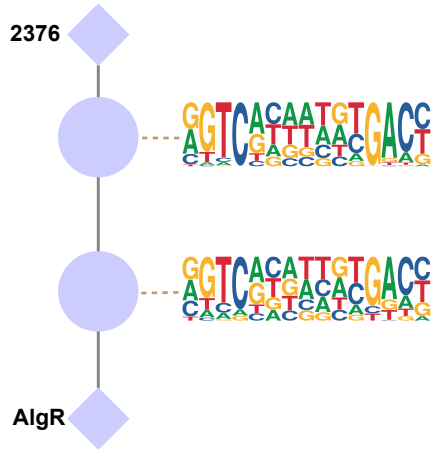

**Module 17**

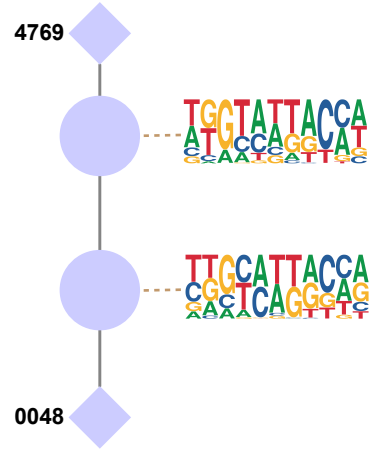

**Module 18**

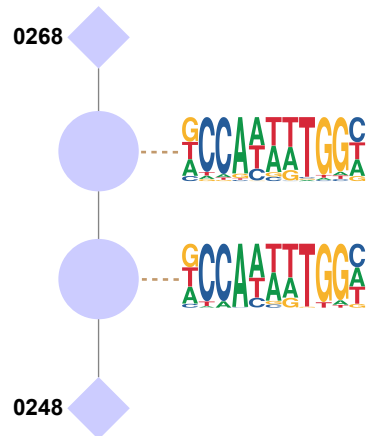

**Module 19**

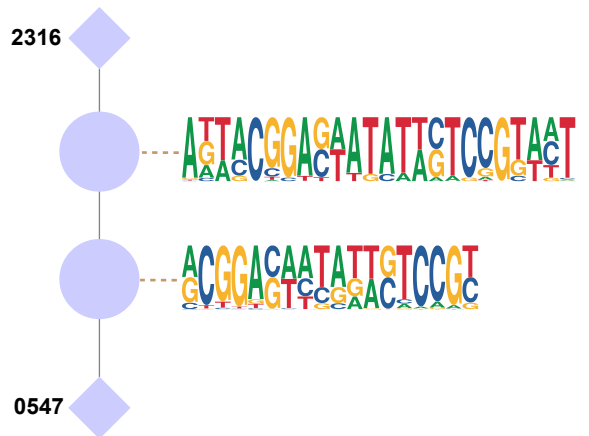

**Module 20**

0864

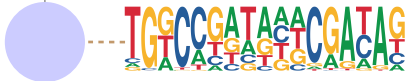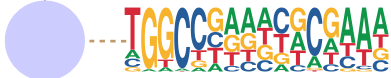

0791

**Module 21**

1704

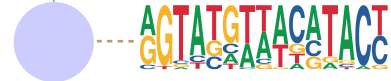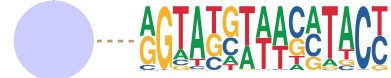

1290

**Module 22**

AmrZ

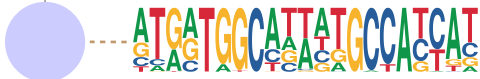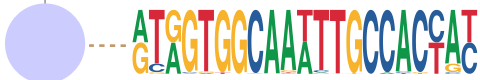

GacA

**Module 23**

3135

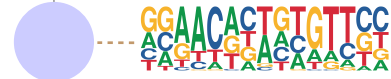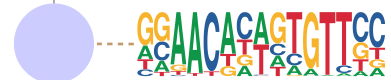

SawR

**Module 24**

CatR

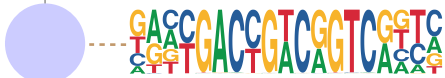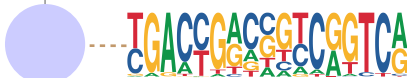

1315

**Module 25**

3341

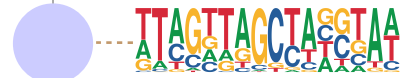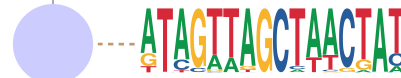

1328

**Module 26**

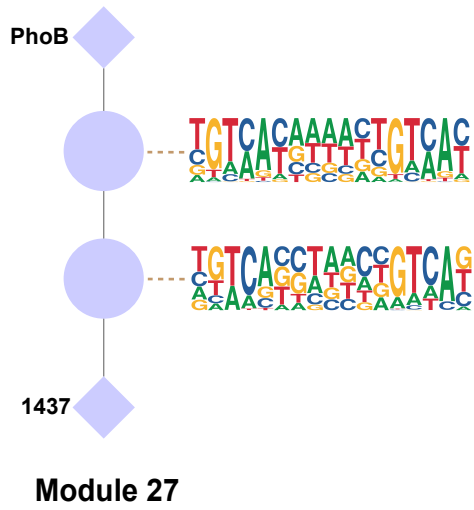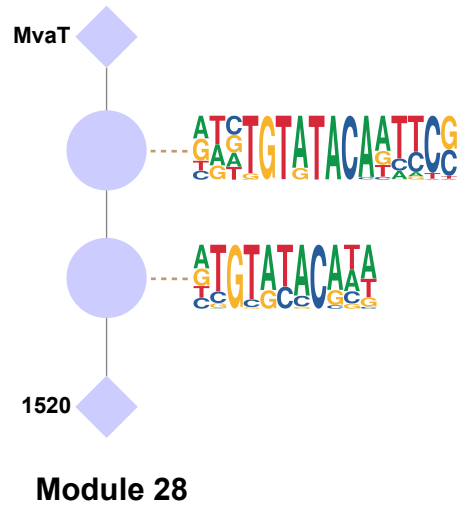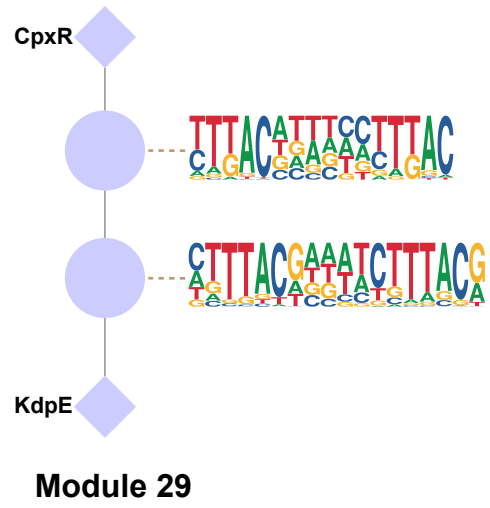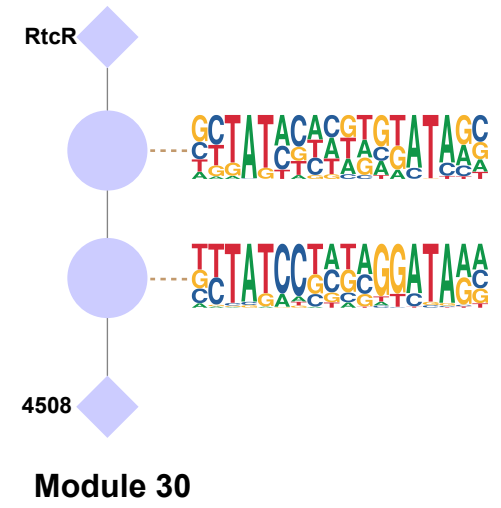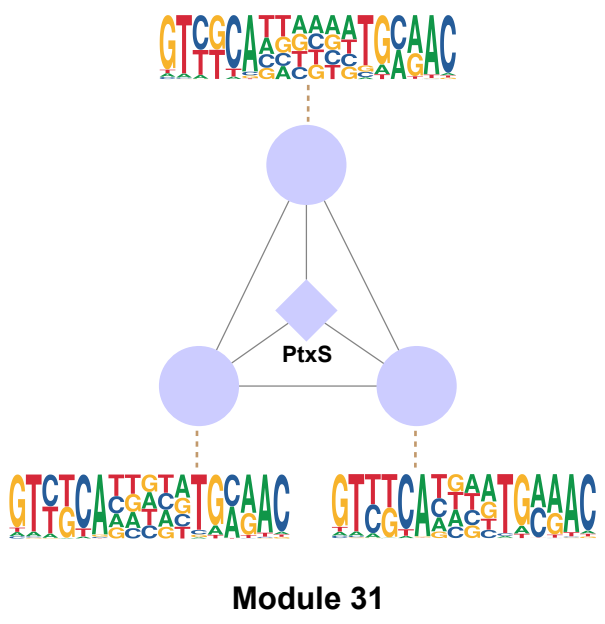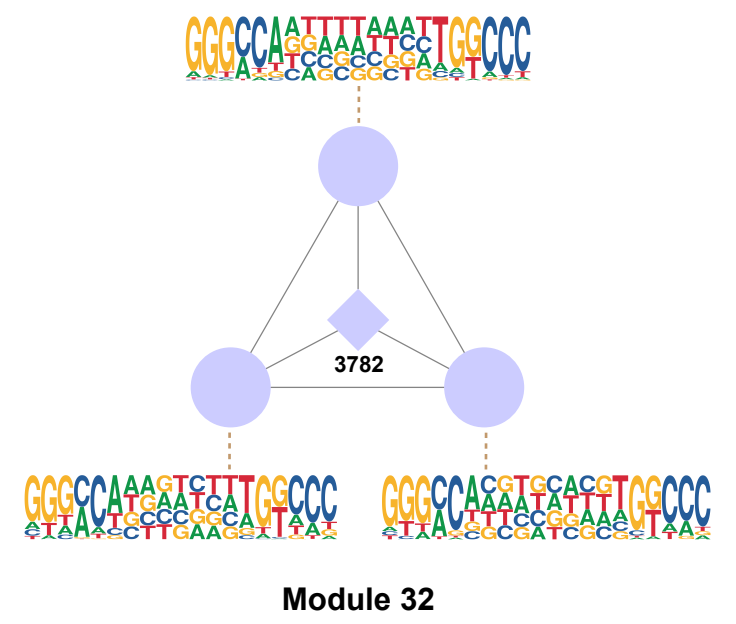

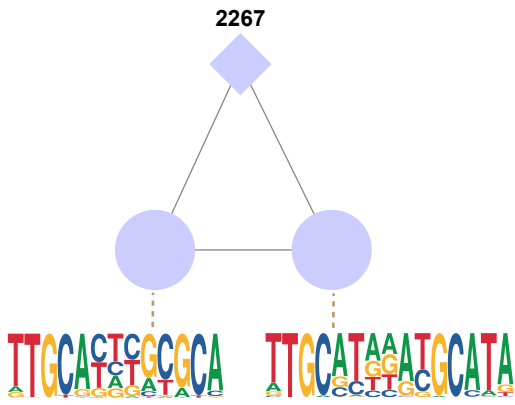

Module 33

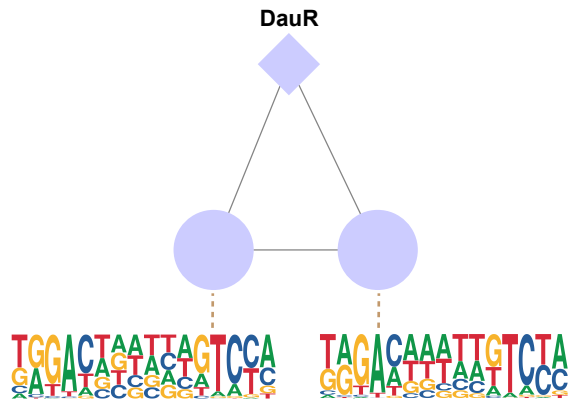

Module 34

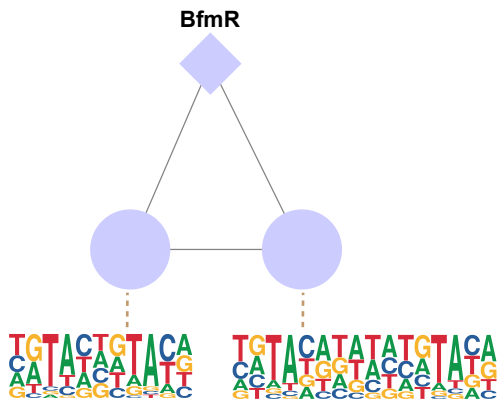

Module 35

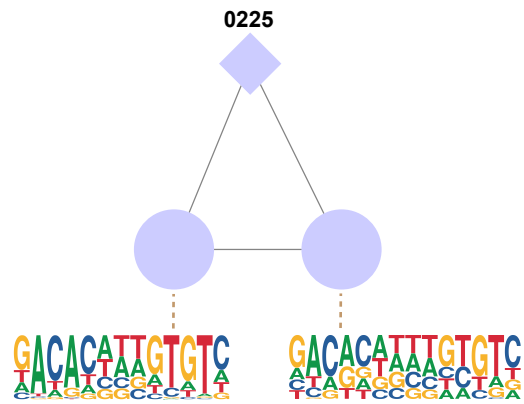

Module 36

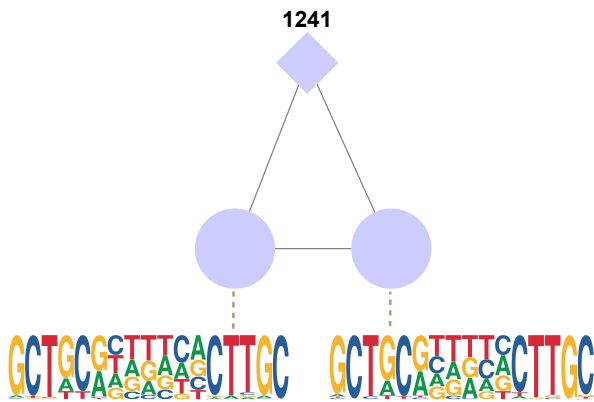

Module 37

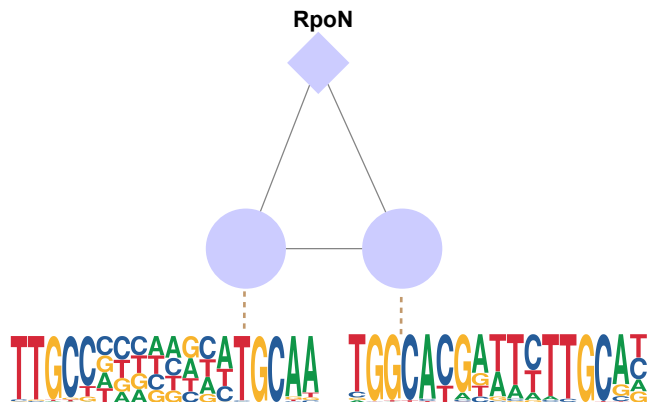

Module 38

TrpI

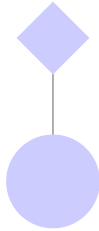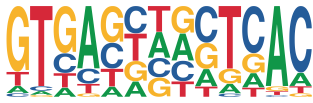

Module 39

0123

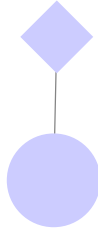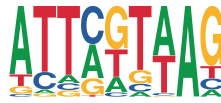

Module 40

0181

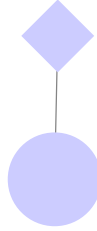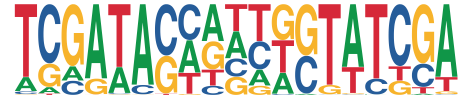

Module 41

AguR

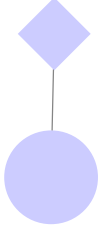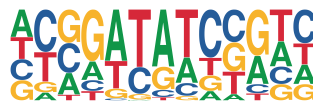

Module 42

CreB

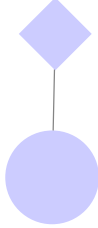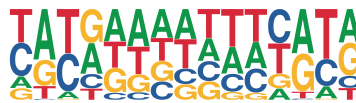

Module 43

0528

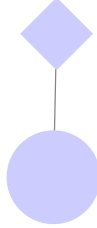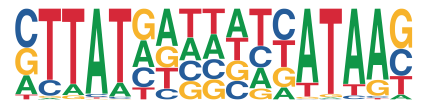

Module 44

0535

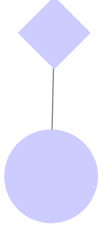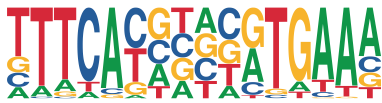

Module 45

0708

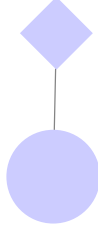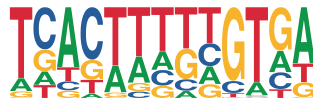

Module 46

AlpR

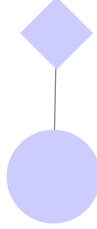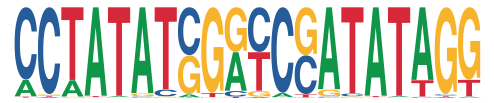

Module 47

0929

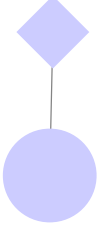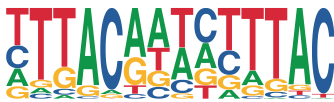

Module 48

FleQ

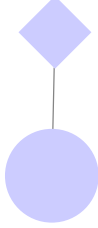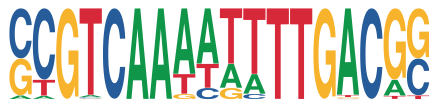

Module 49

FleR

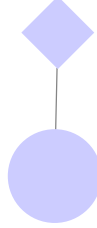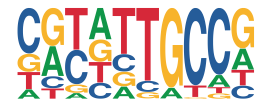

Module 50

1128

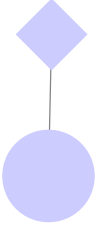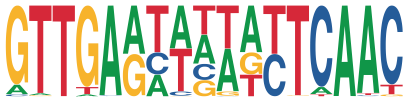

Module 51

1145

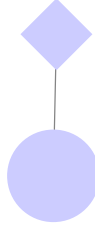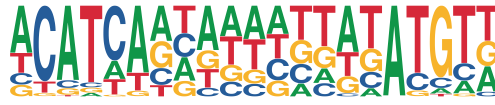

Module 52

DdaR

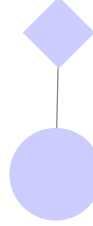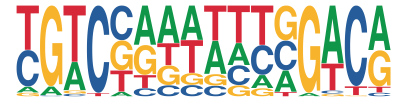

Module 53

1201

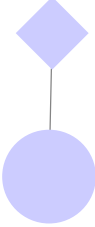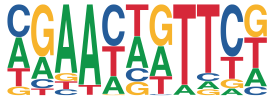

Module 54

1226

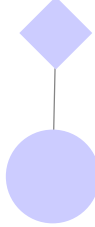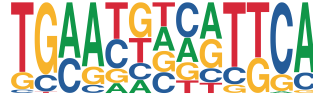

Module 55

1235

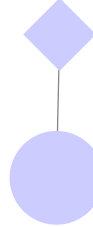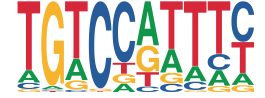

Module 56

1264

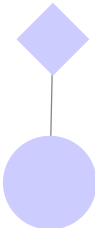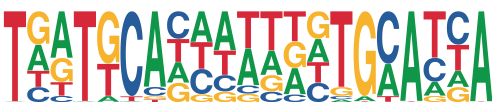

Module 57

1397

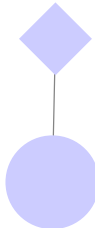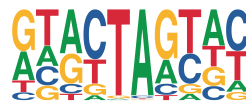

Module 58

1399

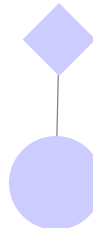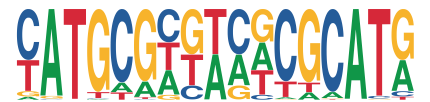

Module 59

LasR

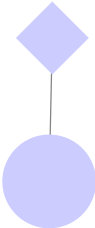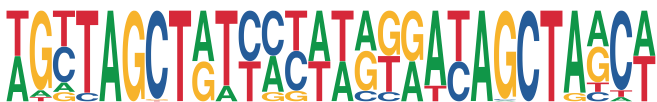

Module 60

RsaL

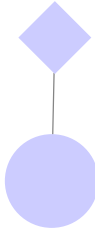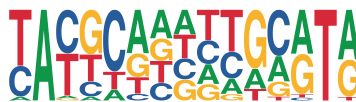

Module 61

1526

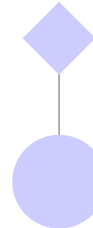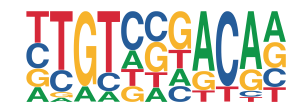

Module 62



1599

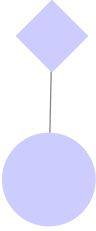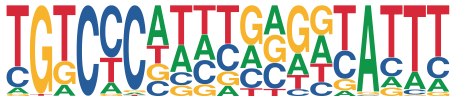

Module 63

1603

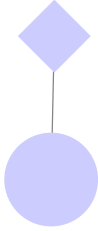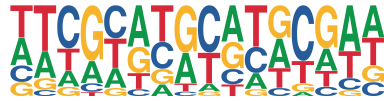

Module 64

1627

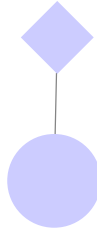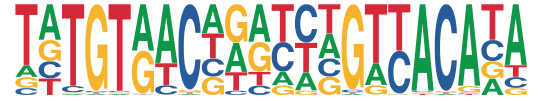

Module 65

1630

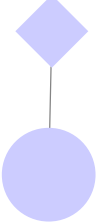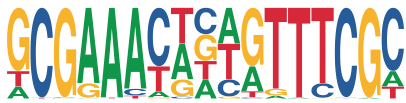

Module 66

CysB

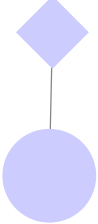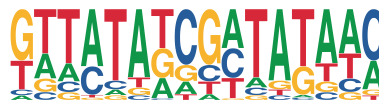

Module 67

1945

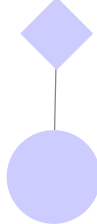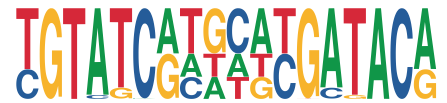

Module 68

EraR

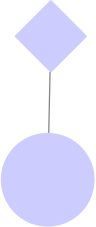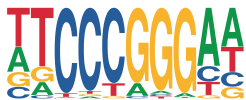

Module 69

HbcR

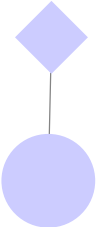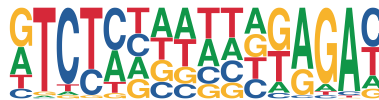

Module 70

2334

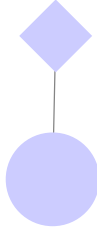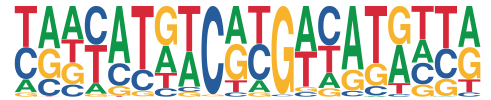

Module 71

2354

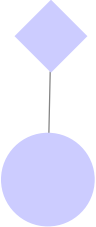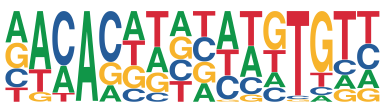

Module 72

2383

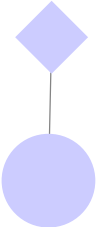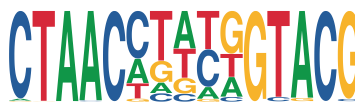

Module 73

2489

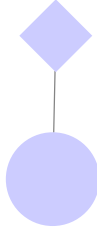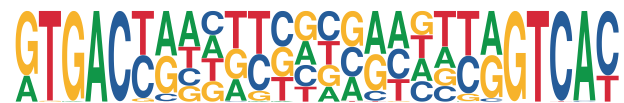

Module 74

MexT

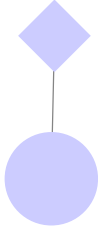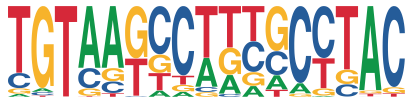

Module 75

CdpR

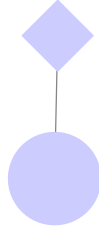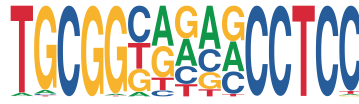

Module 76

BqsR

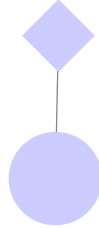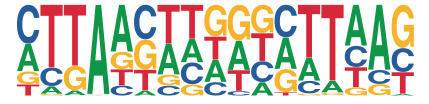

Module 77

2681

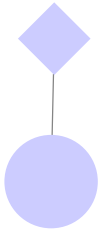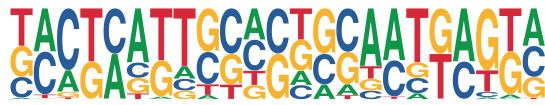

Module 78

CopR

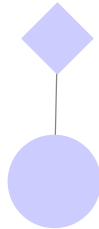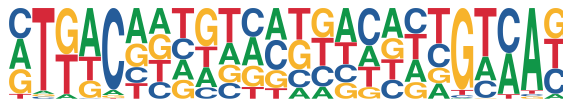

Module 79

2838

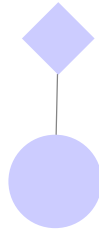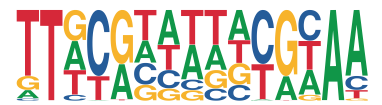

Module 80

2897

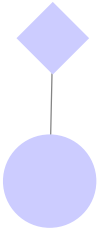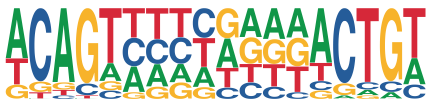

Module 81

PsrA

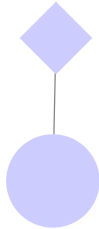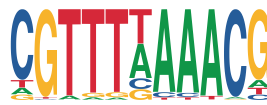

Module 82

CprR

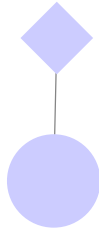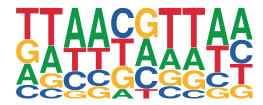

Module 83

3184

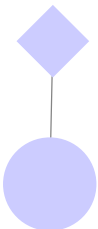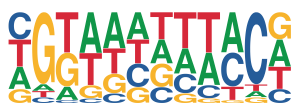

Module 84

3381

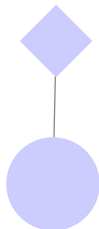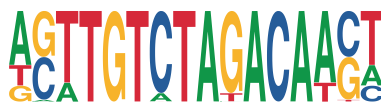

Module 85

3398

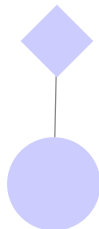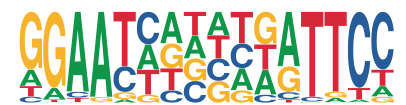

Module 86

3458

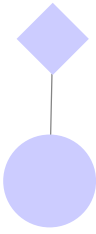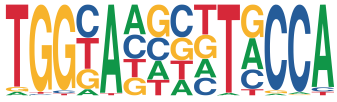

Module 87

NagR

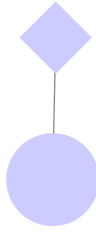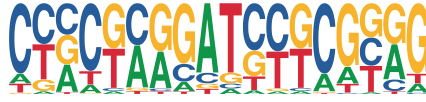

Module 88

NarL

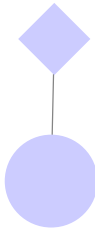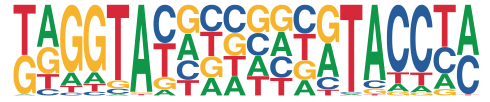

Module 89

4032

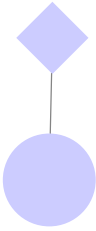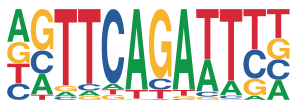

Module 90

SouR

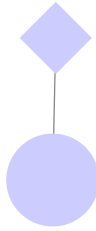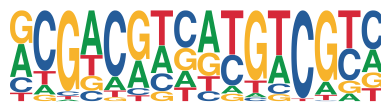

Module 91

PilR

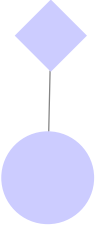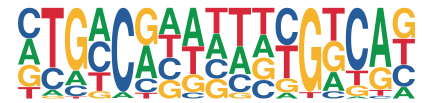

Module 92

4659

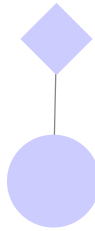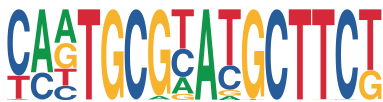

Module 93

4906

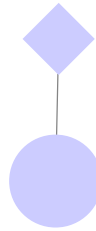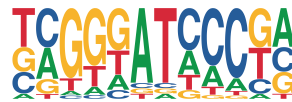

Module 94

4983

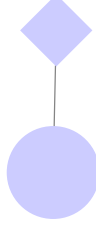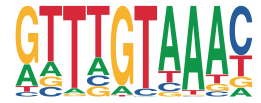

Module 95

4984

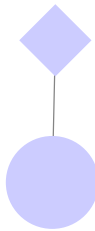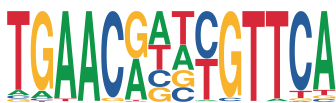

Module 96

4987

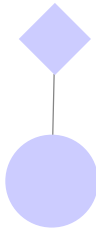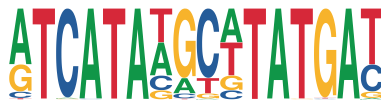

Module 97

4989

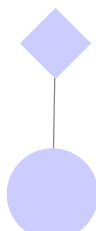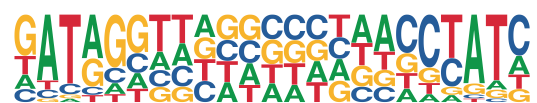

Module 98

5059

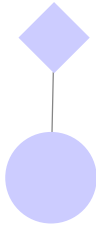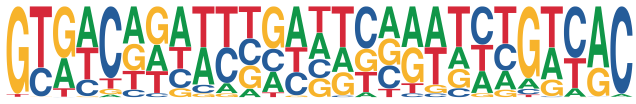

Module 99

NtrC

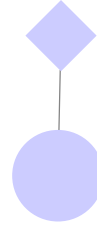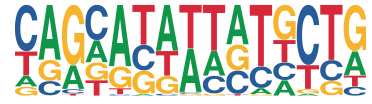

Module 100

5189

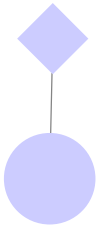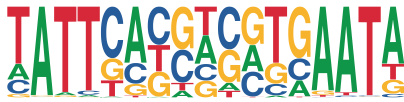

Module 101

5293

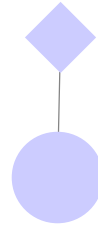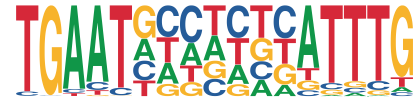

Module 102

SphR

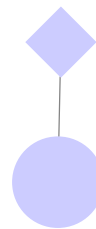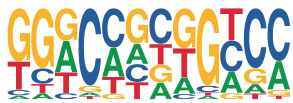

Module 103

AlgB

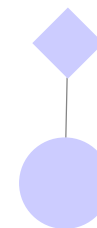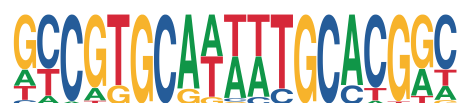

Module 104
