# Supplementary material for: An atlas of the binding specificities of transcription factors in Pseudomonas aeruginosa directs prediction of novel regulators in virulence
Source: eLife. 2021 Mar 29;10:e61885. doi: 10.7554/eLife.61885 (PMC8041468; doi:10.7554/eLife.61885)
Supplement: Supplementary file 1. — (A) Strains, primers, and plasmids, related to Figure 1. (B) DBD family catalogues for 371 TFs, related to Figure 1, Figure 1—figure supplement 1. [file elife-61885-supp1.xlsx]

## Sheet: Supplementary File 1 A
Supplementary File 1 A: Strains, plasmids and primers used in this study, related to Figure 1 A, Figure 3 D-E, Figure 4 C-D, and Figure 5 B-E.
Column A (Line 9-Line 403): The name for strains or plasmids.
Column B (Line 9-Line 403): Description for strains or plasmids.
Column C (Line 9-Line 403): Reference, application, source or reference for the strains or plasmids.
Column A (Line 405-Line 475): The name for primers.
Column B (Line 405-Line 475): The sequences for forward primer
Column C (Line 405-Line 475): The sequences for reverse primer
Strains	Description	Reference or Application
E. coli Strains
E. coli DH5α	supE44 ΔlacU169(φ80lacZΔM15)hsdR17recA1 endA1 gyrA96thi-1 relA1λpir	Stratagene
E. coli BL21(DE3)	F- ompT hsdSB (rB-mB-) gal dcm met (DE3)	Invitrogen
P. aeruginosa strains
P. aeruginosa PAO1	Wild type strain	Lab stock
P. aeruginosa ΔPA2497	Clean deletion of PA2497	This study
P. aeruginosa ΔPA2497/PA2497	Complemented PA2497 gene via pAK1900 vector in PA2497 mutant strain	This study
P. aeruginosa ΔPA1413	Clean deletion of PA1413	This study
P. aeruginosa ΔPA1413/PA1413	Complemented PA1413 gene via pAK1900 vector in PA1413 mutant strain	This study
P. aeruginosa ΔPA0225	Clean deletion of PA0225	This study
P. aeruginosa ΔPA0225/PA0225	Complemented PA0225 gene via pAK1900 vector in PA0225 mutant strain	This study
Plasmids
Name	Description	Source or reference
pEX18AP	a pEX18AP suicide plasmid, used to mutate gene in P. aeruginosa PAO1	Hoang T T, et al., Gene, 1998.
18AP-PA2497	This plasmid was used to mutate PA2497 in P. aeruginosa PAO1	This study
18AP-PA1413	This plasmid was used to mutate PA1413 in P. aeruginosa PAO1	This study
18AP-PA0225	This plasmid was used to mutate PA0225 in P. aeruginosa PAO1	This study
pET28a	N-terminus His-tag fusion expression plasmid. Ori:f1. T7 promoter. Kanr	Invitrogen
pET28a-zur	pET28a containing ORF of zur from P. aeruginosa PAO1	This study
pET28a-xylS	pET28a containing ORF of xylS from P. aeruginosa PAO1	This study
pET28a-vqsM	pET28a containing ORF of vqsM from P. aeruginosa PAO1	This study
pET28a-vfr	pET28a containing ORF of vfr from P. aeruginosa PAO1	This study
pET28a-trpI	pET28a containing ORF of trpI from P. aeruginosa PAO1	This study
pET28a-toxR	pET28a containing ORF of toxR from P. aeruginosa PAO1	This study
pET28a-sphR	pET28a containing ORF of sphR from P. aeruginosa PAO1	This study
pET28a-souR	pET28a containing ORF of souR from P. aeruginosa PAO1	This study
pET28a-sfa3	pET28a containing ORF of sfa3 from P. aeruginosa PAO1	This study
pET28a-sawR	pET28a containing ORF of sawR from P. aeruginosa PAO1	This study
pET28a-rtcR	pET28a containing ORF of rtcR from P. aeruginosa PAO1	This study
pET28a-rsaL	pET28a containing ORF of rsaL from P. aeruginosa PAO1	This study
pET28a-rpoN	pET28a containing ORF of rpoN from P. aeruginosa PAO1	This study
pET28a-roxR	pET28a containing ORF of roxR from P. aeruginosa PAO1	This study
pET28a-rocA2	pET28a containing ORF of rocA2 from P. aeruginosa PAO1	This study
pET28a-rocA1	pET28a containing ORF of rocA1 from P. aeruginosa PAO1	This study
pET28a-rhlR	pET28a containing ORF of rhlR from P. aeruginosa PAO1	This study
pET28a-pyrR	pET28a containing ORF of pyrR from P. aeruginosa PAO1	This study
pET28a-ptxS	pET28a containing ORF of ptxS from P. aeruginosa PAO1	This study
pET28a-ptxR	pET28a containing ORF of ptxR from P. aeruginosa PAO1	This study
pET28a-psrA	pET28a containing ORF of psrA from P. aeruginosa PAO1	This study
pET28a-psdR	pET28a containing ORF of psdR from P. aeruginosa PAO1	This study
pET28a-pruR	pET28a containing ORF of pruR from P. aeruginosa PAO1	This study
pET28a-prtR	pET28a containing ORF of prtR from P. aeruginosa PAO1	This study
pET28a-prtN	pET28a containing ORF of prtN from P. aeruginosa PAO1	This study
pET28a-pprB	pET28a containing ORF of pprB from P. aeruginosa PAO1	This study
pET28a-pmrA	pET28a containing ORF of pmrA from P. aeruginosa PAO1	This study
pET28a-pilR	pET28a containing ORF of pilR from P. aeruginosa PAO1	This study
pET28a-phoP	pET28a containing ORF of phoP from P. aeruginosa PAO1	This study
pET28a-phoB	pET28a containing ORF of phoB from P. aeruginosa PAO1	This study
pET28a-phhR	pET28a containing ORF of phhR from P. aeruginosa PAO1	This study
pET28a-pfeR	pET28a containing ORF of pfeR from P. aeruginosa PAO1	This study
pET28a-pcrR	pET28a containing ORF of pcrR from P. aeruginosa PAO1	This study
pET28a-pchR	pET28a containing ORF of pchR from P. aeruginosa PAO1	This study
pET28a-pcaR	pET28a containing ORF of pcaR from P. aeruginosa PAO1	This study
pET28a-pcaQ	pET28a containing ORF of pcaQ from P. aeruginosa PAO1	This study
pET28a-parR	pET28a containing ORF of parR from P. aeruginosa PAO1	This study
pET28a-oruR	pET28a containing ORF of oruR from P. aeruginosa PAO1	This study
pET28a-ntrC	pET28a containing ORF of ntrC from P. aeruginosa PAO1	This study
pET28a-nrtR	pET28a containing ORF of nrtR from P. aeruginosa PAO1	This study
pET28a-nmoR	pET28a containing ORF of nmoR from P. aeruginosa PAO1	This study
pET28a-nfxB	pET28a containing ORF of nfxB from P. aeruginosa PAO1	This study
pET28a-narL	pET28a containing ORF of narL from P. aeruginosa PAO1	This study
pET28a-nagR	pET28a containing ORF of nagR from P. aeruginosa PAO1	This study
pET28a-mvfR	pET28a containing ORF of mvfR from P. aeruginosa PAO1	This study
pET28a-mvaT	pET28a containing ORF of mvaT from P. aeruginosa PAO1	This study
pET28a-mtlR	pET28a containing ORF of mtlR from P. aeruginosa PAO1	This study
pET28a-mmsR	pET28a containing ORF of mmsR from P. aeruginosa PAO1	This study
pET28a-mifR	pET28a containing ORF of mifR from P. aeruginosa PAO1	This study
pET28a-mexT	pET28a containing ORF of mexT from P. aeruginosa PAO1	This study
pET28a-metR	pET28a containing ORF of metR from P. aeruginosa PAO1	This study
pET28a-lhpR	pET28a containing ORF of lhpR from P. aeruginosa PAO1	This study
pET28a-lasR	pET28a containing ORF of lasR from P. aeruginosa PAO1	This study
pET28a-laoR	pET28a containing ORF of laoR from P. aeruginosa PAO1	This study
pET28a-kdpE	pET28a containing ORF of kdpE from P. aeruginosa PAO1	This study
pET28a-irlR	pET28a containing ORF of irlR from P. aeruginosa PAO1	This study
pET28a-hutR	pET28a containing ORF of hutR from P. aeruginosa PAO1	This study
pET28a-hmgR	pET28a containing ORF of hmgR from P. aeruginosa PAO1	This study
pET28a-hbcR	pET28a containing ORF of hbcR from P. aeruginosa PAO1	This study
pET28a-gntR	pET28a containing ORF of gntR from P. aeruginosa PAO1	This study
pET28a-gltR	pET28a containing ORF of gltR from P. aeruginosa PAO1	This study
pET28a-glmR	pET28a containing ORF of glmR from P. aeruginosa PAO1	This study
pET28a-glcC	pET28a containing ORF of glcC from P. aeruginosa PAO1	This study
pET28a-gfnR	pET28a containing ORF of gfnR from P. aeruginosa PAO1	This study
pET28a-gcsR	pET28a containing ORF of gcsR from P. aeruginosa PAO1	This study
pET28a-gcdR	pET28a containing ORF of gcdR from P. aeruginosa PAO1	This study
pET28a-gacA	pET28a containing ORF of gacA from P. aeruginosa PAO1	This study
pET28a-fleR	pET28a containing ORF of fleR from P. aeruginosa PAO1	This study
pET28a-fleQ	pET28a containing ORF of fleQ from P. aeruginosa PAO1	This study
pET28a-exsA	pET28a containing ORF of exsA from P. aeruginosa PAO1	This study
pET28a-erdR	pET28a containing ORF of erdR from P. aeruginosa PAO1	This study
pET28a-erbR	pET28a containing ORF of erbR from P. aeruginosa PAO1	This study
pET28a-eraR	pET28a containing ORF of eraR from P. aeruginosa PAO1	This study
pET28a-dnr	pET28a containing ORF of dnr from P. aeruginosa PAO1	This study
pET28a-dhcR	pET28a containing ORF of dhcR from P. aeruginosa PAO1	This study
pET28a-ddaR	pET28a containing ORF of ddaR from P. aeruginosa PAO1	This study
pET28a-dctD	pET28a containing ORF of dctD from P. aeruginosa PAO1	This study
pET28a-dauR	pET28a containing ORF of dauR from P. aeruginosa PAO1	This study
pET28a-czcR	pET28a containing ORF of czcR from P. aeruginosa PAO1	This study
pET28a-cysB	pET28a containing ORF of cysB from P. aeruginosa PAO1	This study
pET28a-cynR	pET28a containing ORF of cynR from P. aeruginosa PAO1	This study
pET28a-creB	pET28a containing ORF of creB from P. aeruginosa PAO1	This study
pET28a-cpxR	pET28a containing ORF of cpxR from P. aeruginosa PAO1	This study
pET28a-cprR	pET28a containing ORF of cprR from P. aeruginosa PAO1	This study
pET28a-copR	pET28a containing ORF of copR from P. aeruginosa PAO1	This study
pET28a-colR	pET28a containing ORF of colR from P. aeruginosa PAO1	This study
pET28a-cmrA	pET28a containing ORF of cmrA from P. aeruginosa PAO1	This study
pET28a-chpD	pET28a containing ORF of chpD from P. aeruginosa PAO1	This study
pET28a-cdhR	pET28a containing ORF of cdhR from P. aeruginosa PAO1	This study
pET28a-cbrB	pET28a containing ORF of cbrB from P. aeruginosa PAO1	This study
pET28a-catR	pET28a containing ORF of catR from P. aeruginosa PAO1	This study
pET28a-bqsR	pET28a containing ORF of bqsR from P. aeruginosa PAO1	This study
pET28a-bkdR	pET28a containing ORF of bkdR from P. aeruginosa PAO1	This study
pET28a-bfmR	pET28a containing ORF of bfmR from P. aeruginosa PAO1	This study
pET28a-bfiR	pET28a containing ORF of bfiR from P. aeruginosa PAO1	This study
pET28a-betI	pET28a containing ORF of betI from P. aeruginosa PAO1	This study
pET28a-argR	pET28a containing ORF of argR from P. aeruginosa PAO1	This study
pET28a-anr	pET28a containing ORF of anr from P. aeruginosa PAO1	This study
pET28a-amrZ	pET28a containing ORF of amrZ from P. aeruginosa PAO1	This study
pET28a-ampR	pET28a containing ORF of ampR from P. aeruginosa PAO1	This study
pET28a-amgR	pET28a containing ORF of amgR from P. aeruginosa PAO1	This study
pET28a-amaR	pET28a containing ORF of amaR from P. aeruginosa PAO1	This study
pET28a-alpR	pET28a containing ORF of alpR from P. aeruginosa PAO1	This study
pET28a-algR	pET28a containing ORF of algR from P. aeruginosa PAO1	This study
pET28a-algQ	pET28a containing ORF of algQ from P. aeruginosa PAO1	This study
pET28a-algB	pET28a containing ORF of algB from P. aeruginosa PAO1	This study
pET28a-aguR	pET28a containing ORF of aguR from P. aeruginosa PAO1	This study
pET28a-agtR	pET28a containing ORF of agtR from P. aeruginosa PAO1	This study
pET28a-ada	pET28a containing ORF of ada from P. aeruginosa PAO1	This study
pET28a-acoR	pET28a containing ORF of acoR from P. aeruginosa PAO1	This study
pET28a-aauR	pET28a containing ORF of aauR from P. aeruginosa PAO1	This study
pET28a-PA5525	pET28a containing ORF of PA5525 from P. aeruginosa PAO1	This study
pET28a-PA5438	pET28a containing ORF of PA5438 from P. aeruginosa PAO1	This study
pET28a-PA5431	pET28a containing ORF of PA5431 from P. aeruginosa PAO1	This study
pET28a-PA5428	pET28a containing ORF of PA5428 from P. aeruginosa PAO1	This study
pET28a-PA5403	pET28a containing ORF of PA5403 from P. aeruginosa PAO1	This study
pET28a-PA5382	pET28a containing ORF of PA5382 from P. aeruginosa PAO1	This study
pET28a-PA5342	pET28a containing ORF of PA5342 from P. aeruginosa PAO1	This study
pET28a-PA5293	pET28a containing ORF of PA5293 from P. aeruginosa PAO1	This study
pET28a-PA5283	pET28a containing ORF of PA5283 from P. aeruginosa PAO1	This study
pET28a-PA5218	pET28a containing ORF of PA5218 from P. aeruginosa PAO1	This study
pET28a-PA5189	pET28a containing ORF of PA5189 from P. aeruginosa PAO1	This study
pET28a-PA5179	pET28a containing ORF of PA5179 from P. aeruginosa PAO1	This study
pET28a-PA5157	pET28a containing ORF of PA5157 from P. aeruginosa PAO1	This study
pET28a-PA5116	pET28a containing ORF of PA5116 from P. aeruginosa PAO1	This study
pET28a-PA5059	pET28a containing ORF of PA5059 from P. aeruginosa PAO1	This study
pET28a-PA5032	pET28a containing ORF of PA5032 from P. aeruginosa PAO1	This study
pET28a-PA5029	pET28a containing ORF of PA5029 from P. aeruginosa PAO1	This study
pET28a-PA4989	pET28a containing ORF of PA4989 from P. aeruginosa PAO1	This study
pET28a-PA4987	pET28a containing ORF of PA4987 from P. aeruginosa PAO1	This study
pET28a-PA4984	pET28a containing ORF of PA4984 from P. aeruginosa PAO1	This study
pET28a-PA4983	pET28a containing ORF of PA4983 from P. aeruginosa PAO1	This study
pET28a-PA4906	pET28a containing ORF of PA4906 from P. aeruginosa PAO1	This study
pET28a-PA4902	pET28a containing ORF of PA4902 from P. aeruginosa PAO1	This study
pET28a-PA4831	pET28a containing ORF of PA4831 from P. aeruginosa PAO1	This study
pET28a-PA4806	pET28a containing ORF of PA4806 from P. aeruginosa PAO1	This study
pET28a-PA4787	pET28a containing ORF of PA4787 from P. aeruginosa PAO1	This study
pET28a-PA4784	pET28a containing ORF of PA4784 from P. aeruginosa PAO1	This study
pET28a-PA4769	pET28a containing ORF of PA4769 from P. aeruginosa PAO1	This study
pET28a-PA4659	pET28a containing ORF of PA4659 from P. aeruginosa PAO1	This study
pET28a-PA4508	pET28a containing ORF of PA4508 from P. aeruginosa PAO1	This study
pET28a-PA4436	pET28a containing ORF of PA4436 from P. aeruginosa PAO1	This study
pET28a-PA4341	pET28a containing ORF of PA4341 from P. aeruginosa PAO1	This study
pET28a-PA4288	pET28a containing ORF of PA4288 from P. aeruginosa PAO1	This study
pET28a-PA4185	pET28a containing ORF of PA4185 from P. aeruginosa PAO1	This study
pET28a-PA4174	pET28a containing ORF of PA4174 from P. aeruginosa PAO1	This study
pET28a-PA4165	pET28a containing ORF of PA4165 from P. aeruginosa PAO1	This study
pET28a-PA4157	pET28a containing ORF of PA4157 from P. aeruginosa PAO1	This study
pET28a-PA4145	pET28a containing ORF of PA4145 from P. aeruginosa PAO1	This study
pET28a-PA4135	pET28a containing ORF of PA4135 from P. aeruginosa PAO1	This study
pET28a-PA4132	pET28a containing ORF of PA4132 from P. aeruginosa PAO1	This study
pET28a-PA4120	pET28a containing ORF of PA4120 from P. aeruginosa PAO1	This study
pET28a-PA4094	pET28a containing ORF of PA4094 from P. aeruginosa PAO1	This study
pET28a-PA4080	pET28a containing ORF of PA4080 from P. aeruginosa PAO1	This study
pET28a-PA4077	pET28a containing ORF of PA4077 from P. aeruginosa PAO1	This study
pET28a-PA4074	pET28a containing ORF of PA4074 from P. aeruginosa PAO1	This study
pET28a-PA4070	pET28a containing ORF of PA4070 from P. aeruginosa PAO1	This study
pET28a-PA4032	pET28a containing ORF of PA4032 from P. aeruginosa PAO1	This study
pET28a-PA4021	pET28a containing ORF of PA4021 from P. aeruginosa PAO1	This study
pET28a-PA3995	pET28a containing ORF of PA3995 from P. aeruginosa PAO1	This study
pET28a-PA3973	pET28a containing ORF of PA3973 from P. aeruginosa PAO1	This study
pET28a-PA3965	pET28a containing ORF of PA3965 from P. aeruginosa PAO1	This study
pET28a-PA3932	pET28a containing ORF of PA3932 from P. aeruginosa PAO1	This study
pET28a-PA3927	pET28a containing ORF of PA3927 from P. aeruginosa PAO1	This study
pET28a-PA3921	pET28a containing ORF of PA3921 from P. aeruginosa PAO1	This study
pET28a-PA3898	pET28a containing ORF of PA3898 from P. aeruginosa PAO1	This study
pET28a-PA3895	pET28a containing ORF of PA3895 from P. aeruginosa PAO1	This study
pET28a-PA3845	pET28a containing ORF of PA3845 from P. aeruginosa PAO1	This study
pET28a-PA3830	pET28a containing ORF of PA3830 from P. aeruginosa PAO1	This study
pET28a-PA3782	pET28a containing ORF of PA3782 from P. aeruginosa PAO1	This study
pET28a-PA3778	pET28a containing ORF of PA3778 from P. aeruginosa PAO1	This study
pET28a-PA3776	pET28a containing ORF of PA3776 from P. aeruginosa PAO1	This study
pET28a-PA3771	pET28a containing ORF of PA3771 from P. aeruginosa PAO1	This study
pET28a-PA3714	pET28a containing ORF of PA3714 from P. aeruginosa PAO1	This study
pET28a-PA3711	pET28a containing ORF of PA3711 from P. aeruginosa PAO1	This study
pET28a-PA3699	pET28a containing ORF of PA3699 from P. aeruginosa PAO1	This study
pET28a-PA3689	pET28a containing ORF of PA3689 from P. aeruginosa PAO1	This study
pET28a-PA3599	pET28a containing ORF of PA3599 from P. aeruginosa PAO1	This study
pET28a-PA3594	pET28a containing ORF of PA3594 from P. aeruginosa PAO1	This study
pET28a-PA3565	pET28a containing ORF of PA3565 from P. aeruginosa PAO1	This study
pET28a-PA3508	pET28a containing ORF of PA3508 from P. aeruginosa PAO1	This study
pET28a-PA3458	pET28a containing ORF of PA3458 from P. aeruginosa PAO1	This study
pET28a-PA3433	pET28a containing ORF of PA3433 from P. aeruginosa PAO1	This study
pET28a-PA3423	pET28a containing ORF of PA3423 from P. aeruginosa PAO1	This study
pET28a-PA3420	pET28a containing ORF of PA3420 from P. aeruginosa PAO1	This study
pET28a-PA3398	pET28a containing ORF of PA3398 from P. aeruginosa PAO1	This study
pET28a-PA3381	pET28a containing ORF of PA3381 from P. aeruginosa PAO1	This study
pET28a-PA3341	pET28a containing ORF of PA3341 from P. aeruginosa PAO1	This study
pET28a-PA3321	pET28a containing ORF of PA3321 from P. aeruginosa PAO1	This study
pET28a-PA3269	pET28a containing ORF of PA3269 from P. aeruginosa PAO1	This study
pET28a-PA3260	pET28a containing ORF of PA3260 from P. aeruginosa PAO1	This study
pET28a-PA3249	pET28a containing ORF of PA3249 from P. aeruginosa PAO1	This study
pET28a-PA3225	pET28a containing ORF of PA3225 from P. aeruginosa PAO1	This study
pET28a-PA3220	pET28a containing ORF of PA3220 from P. aeruginosa PAO1	This study
pET28a-PA3215	pET28a containing ORF of PA3215 from P. aeruginosa PAO1	This study
pET28a-PA3184	pET28a containing ORF of PA3184 from P. aeruginosa PAO1	This study
pET28a-PA3135	pET28a containing ORF of PA3135 from P. aeruginosa PAO1	This study
pET28a-PA3124	pET28a containing ORF of PA3124 from P. aeruginosa PAO1	This study
pET28a-PA3122	pET28a containing ORF of PA3122 from P. aeruginosa PAO1	This study
pET28a-PA3094	pET28a containing ORF of PA3094 from P. aeruginosa PAO1	This study
pET28a-PA3067	pET28a containing ORF of PA3067 from P. aeruginosa PAO1	This study
pET28a-PA3034	pET28a containing ORF of PA3034 from P. aeruginosa PAO1	This study
pET28a-PA3027	pET28a containing ORF of PA3027 from P. aeruginosa PAO1	This study
pET28a-PA2957	pET28a containing ORF of PA2957 from P. aeruginosa PAO1	This study
pET28a-PA2930	pET28a containing ORF of PA2930 from P. aeruginosa PAO1	This study
pET28a-PA2921	pET28a containing ORF of PA2921 from P. aeruginosa PAO1	This study
pET28a-PA2917	pET28a containing ORF of PA2917 from P. aeruginosa PAO1	This study
pET28a-PA2899	pET28a containing ORF of PA2899 from P. aeruginosa PAO1	This study
pET28a-PA2897	pET28a containing ORF of PA2897 from P. aeruginosa PAO1	This study
pET28a-PA2879	pET28a containing ORF of PA2879 from P. aeruginosa PAO1	This study
pET28a-PA2877	pET28a containing ORF of PA2877 from P. aeruginosa PAO1	This study
pET28a-PA2848	pET28a containing ORF of PA2848 from P. aeruginosa PAO1	This study
pET28a-PA2846	pET28a containing ORF of PA2846 from P. aeruginosa PAO1	This study
pET28a-PA2838	pET28a containing ORF of PA2838 from P. aeruginosa PAO1	This study
pET28a-PA2834	pET28a containing ORF of PA2834 from P. aeruginosa PAO1	This study
pET28a-PA2802	pET28a containing ORF of PA2802 from P. aeruginosa PAO1	This study
pET28a-PA2766	pET28a containing ORF of PA2766 from P. aeruginosa PAO1	This study
pET28a-PA2758	pET28a containing ORF of PA2758 from P. aeruginosa PAO1	This study
pET28a-PA2718	pET28a containing ORF of PA2718 from P. aeruginosa PAO1	This study
pET28a-PA2704	pET28a containing ORF of PA2704 from P. aeruginosa PAO1	This study
pET28a-PA2696	pET28a containing ORF of PA2696 from P. aeruginosa PAO1	This study
pET28a-PA2692	pET28a containing ORF of PA2692 from P. aeruginosa PAO1	This study
pET28a-PA2681	pET28a containing ORF of PA2681 from P. aeruginosa PAO1	This study
pET28a-PA2601	pET28a containing ORF of PA2601 from P. aeruginosa PAO1	This study
pET28a-PA2588	pET28a containing ORF of PA2588 from P. aeruginosa PAO1	This study
pET28a-PA2577	pET28a containing ORF of PA2577 from P. aeruginosa PAO1	This study
pET28a-PA2556	pET28a containing ORF of PA2556 from P. aeruginosa PAO1	This study
pET28a-PA2551	pET28a containing ORF of PA2551 from P. aeruginosa PAO1	This study
pET28a-PA2547	pET28a containing ORF of PA2547 from P. aeruginosa PAO1	This study
pET28a-PA2534	pET28a containing ORF of PA2534 from P. aeruginosa PAO1	This study
pET28a-PA2497	pET28a containing ORF of PA2497 from P. aeruginosa PAO1	This study
pET28a-PA2489	pET28a containing ORF of PA2489 from P. aeruginosa PAO1	This study
pET28a-PA2488	pET28a containing ORF of PA2488 from P. aeruginosa PAO1	This study
pET28a-PA2479	pET28a containing ORF of PA2479 from P. aeruginosa PAO1	This study
pET28a-PA2469	pET28a containing ORF of PA2469 from P. aeruginosa PAO1	This study
pET28a-PA2447	pET28a containing ORF of PA2447 from P. aeruginosa PAO1	This study
pET28a-PA2417	pET28a containing ORF of PA2417 from P. aeruginosa PAO1	This study
pET28a-PA2383	pET28a containing ORF of PA2383 from P. aeruginosa PAO1	This study
pET28a-PA2376	pET28a containing ORF of PA2376 from P. aeruginosa PAO1	This study
pET28a-PA2354	pET28a containing ORF of PA2354 from P. aeruginosa PAO1	This study
pET28a-PA2334	pET28a containing ORF of PA2334 from P. aeruginosa PAO1	This study
pET28a-PA2332	pET28a containing ORF of PA2332 from P. aeruginosa PAO1	This study
pET28a-PA2316	pET28a containing ORF of PA2316 from P. aeruginosa PAO1	This study
pET28a-PA2312	pET28a containing ORF of PA2312 from P. aeruginosa PAO1	This study
pET28a-PA2299	pET28a containing ORF of PA2299 from P. aeruginosa PAO1	This study
pET28a-PA2281	pET28a containing ORF of PA2281 from P. aeruginosa PAO1	This study
pET28a-PA2276	pET28a containing ORF of PA2276 from P. aeruginosa PAO1	This study
pET28a-PA2270	pET28a containing ORF of PA2270 from P. aeruginosa PAO1	This study
pET28a-PA2267	pET28a containing ORF of PA2267 from P. aeruginosa PAO1	This study
pET28a-PA2220	pET28a containing ORF of PA2220 from P. aeruginosa PAO1	This study
pET28a-PA2206	pET28a containing ORF of PA2206 from P. aeruginosa PAO1	This study
pET28a-PA2196	pET28a containing ORF of PA2196 from P. aeruginosa PAO1	This study
pET28a-PA2123	pET28a containing ORF of PA2123 from P. aeruginosa PAO1	This study
pET28a-PA2121	pET28a containing ORF of PA2121 from P. aeruginosa PAO1	This study
pET28a-PA2115	pET28a containing ORF of PA2115 from P. aeruginosa PAO1	This study
pET28a-PA2100	pET28a containing ORF of PA2100 from P. aeruginosa PAO1	This study
pET28a-PA2096	pET28a containing ORF of PA2096 from P. aeruginosa PAO1	This study
pET28a-PA2076	pET28a containing ORF of PA2076 from P. aeruginosa PAO1	This study
pET28a-PA2056	pET28a containing ORF of PA2056 from P. aeruginosa PAO1	This study
pET28a-PA2032	pET28a containing ORF of PA2032 from P. aeruginosa PAO1	This study
pET28a-PA2028	pET28a containing ORF of PA2028 from P. aeruginosa PAO1	This study
pET28a-PA1961	pET28a containing ORF of PA1961 from P. aeruginosa PAO1	This study
pET28a-PA1945	pET28a containing ORF of PA1945 from P. aeruginosa PAO1	This study
pET28a-PA1884	pET28a containing ORF of PA1884 from P. aeruginosa PAO1	This study
pET28a-PA1864	pET28a containing ORF of PA1864 from P. aeruginosa PAO1	This study
pET28a-PA1859	pET28a containing ORF of PA1859 from P. aeruginosa PAO1	This study
pET28a-PA1853	pET28a containing ORF of PA1853 from P. aeruginosa PAO1	This study
pET28a-PA1850	pET28a containing ORF of PA1850 from P. aeruginosa PAO1	This study
pET28a-PA1836	pET28a containing ORF of PA1836 from P. aeruginosa PAO1	This study
pET28a-PA1826	pET28a containing ORF of PA1826 from P. aeruginosa PAO1	This study
pET28a-PA1760	pET28a containing ORF of PA1760 from P. aeruginosa PAO1	This study
pET28a-PA1759	pET28a containing ORF of PA1759 from P. aeruginosa PAO1	This study
pET28a-PA1738	pET28a containing ORF of PA1738 from P. aeruginosa PAO1	This study
pET28a-PA1653	pET28a containing ORF of PA1653 from P. aeruginosa PAO1	This study
pET28a-PA1630	pET28a containing ORF of PA1630 from P. aeruginosa PAO1	This study
pET28a-PA1627	pET28a containing ORF of PA1627 from P. aeruginosa PAO1	This study
pET28a-PA1619	pET28a containing ORF of PA1619 from P. aeruginosa PAO1	This study
pET28a-PA1603	pET28a containing ORF of PA1603 from P. aeruginosa PAO1	This study
pET28a-PA1599	pET28a containing ORF of PA1599 from P. aeruginosa PAO1	This study
pET28a-PA1570	pET28a containing ORF of PA1570 from P. aeruginosa PAO1	This study
pET28a-PA1526	pET28a containing ORF of PA1526 from P. aeruginosa PAO1	This study
pET28a-PA1520	pET28a containing ORF of PA1520 from P. aeruginosa PAO1	This study
pET28a-PA1504	pET28a containing ORF of PA1504 from P. aeruginosa PAO1	This study
pET28a-PA1490	pET28a containing ORF of PA1490 from P. aeruginosa PAO1	This study
pET28a-PA1484	pET28a containing ORF of PA1484 from P. aeruginosa PAO1	This study
pET28a-PA1437	pET28a containing ORF of PA1437 from P. aeruginosa PAO1	This study
pET28a-PA1413	pET28a containing ORF of PA1413 from P. aeruginosa PAO1	This study
pET28a-PA1403	pET28a containing ORF of PA1403 from P. aeruginosa PAO1	This study
pET28a-PA1399	pET28a containing ORF of PA1399 from P. aeruginosa PAO1	This study
pET28a-PA1397	pET28a containing ORF of PA1397 from P. aeruginosa PAO1	This study
pET28a-PA1380	pET28a containing ORF of PA1380 from P. aeruginosa PAO1	This study
pET28a-PA1359	pET28a containing ORF of PA1359 from P. aeruginosa PAO1	This study
pET28a-PA1347	pET28a containing ORF of PA1347 from P. aeruginosa PAO1	This study
pET28a-PA1328	pET28a containing ORF of PA1328 from P. aeruginosa PAO1	This study
pET28a-PA1315	pET28a containing ORF of PA1315 from P. aeruginosa PAO1	This study
pET28a-PA1312	pET28a containing ORF of PA1312 from P. aeruginosa PAO1	This study
pET28a-PA1309	pET28a containing ORF of PA1309 from P. aeruginosa PAO1	This study
pET28a-PA1290	pET28a containing ORF of PA1290 from P. aeruginosa PAO1	This study
pET28a-PA1285	pET28a containing ORF of PA1285 from P. aeruginosa PAO1	This study
pET28a-PA1283	pET28a containing ORF of PA1283 from P. aeruginosa PAO1	This study
pET28a-PA1269	pET28a containing ORF of PA1269 from P. aeruginosa PAO1	This study
pET28a-PA1264	pET28a containing ORF of PA1264 from P. aeruginosa PAO1	This study
pET28a-PA1241	pET28a containing ORF of PA1241 from P. aeruginosa PAO1	This study
pET28a-PA1235	pET28a containing ORF of PA1235 from P. aeruginosa PAO1	This study
pET28a-PA1229	pET28a containing ORF of PA1229 from P. aeruginosa PAO1	This study
pET28a-PA1226	pET28a containing ORF of PA1226 from P. aeruginosa PAO1	This study
pET28a-PA1223	pET28a containing ORF of PA1223 from P. aeruginosa PAO1	This study
pET28a-PA1201	pET28a containing ORF of PA1201 from P. aeruginosa PAO1	This study
pET28a-PA1184	pET28a containing ORF of PA1184 from P. aeruginosa PAO1	This study
pET28a-PA1182	pET28a containing ORF of PA1182 from P. aeruginosa PAO1	This study
pET28a-PA1157	pET28a containing ORF of PA1157 from P. aeruginosa PAO1	This study
pET28a-PA1145	pET28a containing ORF of PA1145 from P. aeruginosa PAO1	This study
pET28a-PA1142	pET28a containing ORF of PA1142 from P. aeruginosa PAO1	This study
pET28a-PA1141	pET28a containing ORF of PA1141 from P. aeruginosa PAO1	This study
pET28a-PA1138	pET28a containing ORF of PA1138 from P. aeruginosa PAO1	This study
pET28a-PA1136	pET28a containing ORF of PA1136 from P. aeruginosa PAO1	This study
pET28a-PA1128	pET28a containing ORF of PA1128 from P. aeruginosa PAO1	This study
pET28a-PA1109	pET28a containing ORF of PA1109 from P. aeruginosa PAO1	This study
pET28a-PA1067	pET28a containing ORF of PA1067 from P. aeruginosa PAO1	This study
pET28a-PA1015	pET28a containing ORF of PA1015 from P. aeruginosa PAO1	This study
pET28a-PA0942	pET28a containing ORF of PA0942 from P. aeruginosa PAO1	This study
pET28a-PA0929	pET28a containing ORF of PA0929 from P. aeruginosa PAO1	This study
pET28a-PA0877	pET28a containing ORF of PA0877 from P. aeruginosa PAO1	This study
pET28a-PA0876	pET28a containing ORF of PA0876 from P. aeruginosa PAO1	This study
pET28a-PA0864	pET28a containing ORF of PA0864 from P. aeruginosa PAO1	This study
pET28a-PA0839	pET28a containing ORF of PA0839 from P. aeruginosa PAO1	This study
pET28a-PA0828	pET28a containing ORF of PA0828 from P. aeruginosa PAO1	This study
pET28a-PA0816	pET28a containing ORF of PA0816 from P. aeruginosa PAO1	This study
pET28a-PA0815	pET28a containing ORF of PA0815 from P. aeruginosa PAO1	This study
pET28a-PA0797	pET28a containing ORF of PA0797 from P. aeruginosa PAO1	This study
pET28a-PA0791	pET28a containing ORF of PA0791 from P. aeruginosa PAO1	This study
pET28a-PA0784	pET28a containing ORF of PA0784 from P. aeruginosa PAO1	This study
pET28a-PA0756	pET28a containing ORF of PA0756 from P. aeruginosa PAO1	This study
pET28a-PA0739	pET28a containing ORF of PA0739 from P. aeruginosa PAO1	This study
pET28a-PA0708	pET28a containing ORF of PA0708 from P. aeruginosa PAO1	This study
pET28a-PA0701	pET28a containing ORF of PA0701 from P. aeruginosa PAO1	This study
pET28a-PA0564	pET28a containing ORF of PA0564 from P. aeruginosa PAO1	This study
pET28a-PA0547	pET28a containing ORF of PA0547 from P. aeruginosa PAO1	This study
pET28a-PA0535	pET28a containing ORF of PA0535 from P. aeruginosa PAO1	This study
pET28a-PA0533	pET28a containing ORF of PA0533 from P. aeruginosa PAO1	This study
pET28a-PA0528	pET28a containing ORF of PA0528 from P. aeruginosa PAO1	This study
pET28a-PA0515	pET28a containing ORF of PA0515 from P. aeruginosa PAO1	This study
pET28a-PA0491	pET28a containing ORF of PA0491 from P. aeruginosa PAO1	This study
pET28a-PA0479	pET28a containing ORF of PA0479 from P. aeruginosa PAO1	This study
pET28a-PA0477	pET28a containing ORF of PA0477 from P. aeruginosa PAO1	This study
pET28a-PA0475	pET28a containing ORF of PA0475 from P. aeruginosa PAO1	This study
pET28a-PA0436	pET28a containing ORF of PA0436 from P. aeruginosa PAO1	This study
pET28a-PA0306	pET28a containing ORF of PA0306 from P. aeruginosa PAO1	This study
pET28a-PA0279	pET28a containing ORF of PA0279 from P. aeruginosa PAO1	This study
pET28a-PA0275	pET28a containing ORF of PA0275 from P. aeruginosa PAO1	This study
pET28a-PA0272	pET28a containing ORF of PA0272 from P. aeruginosa PAO1	This study
pET28a-PA0268	pET28a containing ORF of PA0268 from P. aeruginosa PAO1	This study
pET28a-PA0248	pET28a containing ORF of PA0248 from P. aeruginosa PAO1	This study
pET28a-PA0243	pET28a containing ORF of PA0243 from P. aeruginosa PAO1	This study
pET28a-PA0236	pET28a containing ORF of PA0236 from P. aeruginosa PAO1	This study
pET28a-PA0233	pET28a containing ORF of PA0233 from P. aeruginosa PAO1	This study
pET28a-PA0225	pET28a containing ORF of PA0225 from P. aeruginosa PAO1	This study
pET28a-PA0218	pET28a containing ORF of PA0218 from P. aeruginosa PAO1	This study
pET28a-PA0217	pET28a containing ORF of PA0217 from P. aeruginosa PAO1	This study
pET28a-PA0207	pET28a containing ORF of PA0207 from P. aeruginosa PAO1	This study
pET28a-PA0191	pET28a containing ORF of PA0191 from P. aeruginosa PAO1	This study
pET28a-PA0181	pET28a containing ORF of PA0181 from P. aeruginosa PAO1	This study
pET28a-PA0167	pET28a containing ORF of PA0167 from P. aeruginosa PAO1	This study
pET28a-PA0163	pET28a containing ORF of PA0163 from P. aeruginosa PAO1	This study
pET28a-PA0159	pET28a containing ORF of PA0159 from P. aeruginosa PAO1	This study
pET28a-PA0123	pET28a containing ORF of PA0123 from P. aeruginosa PAO1	This study
pET28a-PA0120	pET28a containing ORF of PA0120 from P. aeruginosa PAO1	This study
pET28a-PA0056	pET28a containing ORF of PA0056 from P. aeruginosa PAO1	This study
pET28a-PA0048	pET28a containing ORF of PA0048 from P. aeruginosa PAO1	This study
pET28a-PA0034	pET28a containing ORF of PA0034 from P. aeruginosa PAO1	This study
pET28a-PA0032	pET28a containing ORF of PA0032 from P. aeruginosa PAO1	This study
pAK1900	An overexpressing plasmid, used for constructing complemented strain.
pAK1900-PA0225	pAK1900 containing PA0225 gene from P. aeruginosa PAO1	Jansons I, et al. Plasmid. 1994.
pAK1900-PA2497	pAK1900 containing PA2497 gene from P. aeruginosa PAO1	This study
pAK1900-PA1413	pAK1900 containing PA1413 gene from P. aeruginosa PAO1	This study
Probe Name	Forward Primer	Reverse Primer
EMSA
algB	ATGCCAGCCTTTCTGAAAAATAAAAAC	CTGTTCTTGGGTTTTCGGGAAG
algD	GGAAATGCCATCTCCGGCG	GGCCTTTCCGTTAAATGCCTG
amrz	GCTCATCGTTCTCCCTCCAATC	TGCCAGTACCAGCTATCTGAAATG
arnB	CCTTTCCAACCCTGCAAGC	CTTGGCCGGGAGAATGGC
dppA3	GAGCCAGTCCGTAGCGC	ATGGGCCATGGCAACTCTC
higB	CGTAGCGACTGTGAGGATCG	CGGAGCACTTGGAATCGGC
katB	TCTTGGCGAATTCCTGAAAATCGA	CCCATGGGTTCACTCCCTGTATT
muxA	GTTGGAGTCATGGTTCTTCTTCAG	CAAGCCTTCGCCCGTAACG
mvaU	CGGGAAACATCCGGCAAGC	AAGTTTGCGCTCTGCCTCG
nirS	CAGGAGCCCTGCGAGG	TCGCGTCCCGCATGTC
nrdA	GAATCGATAAAGAGCCGGGCAG	CGCTCATCGCAAGGAGCC
oprQ	CCAGAACCGCCACGCA	GTGGCTGTCCTCGACAAAC
PA0123	GCTCTCATTGGTCTGGTCGAAAAAT	GAGCGCTGGCCGTTCAG
PA0506	CCCGGCGGCCCCT	GGATCGCTCCCGGTC
PA0530	GCGGACCGTCGGATTACC	GGCCCCTGCTCCAGC
PA1315	ATGGAGCGCGGGTCC	CGATGAAGGTTCCCAGGTAAATG
PA2078	GTCTGCGTCCCCACAGG	GCGCGCCCTTTCCGG
PA2137	CTGGGGCAGGGCGCA	CGCCGTCCGCCCC
PA2384	CTGCCTGCACGTGTTCC	CCAGACCGAGCTGTTTTCCC
PA2439	GACGCCCTCGGCGTCC	AGAACCTTTCGATTGGTTAGGTGTT
PA2784	GACAACGTCCAGTTGCTGCAGAAGTA	CGGTCGCTTGTCATCGGGGGT
PA3205	GGCAGCCACCCCGACG	CGGTTAGCGTCTTGCGCA
PA3360	CCGCTGCGGCGACCAG	ACGCCGTCGACCGGGC
PA3575	ATTGCCTCCTGTTGGTCATCG	GGGCGATCTGTGACGGG
PA3794	AGCGGCTCGCCATGGG	GCACGTCTTGCTGTGACTCC
PA3762	ACATCGTTTTCTCCGCACGA	GGCTGAAGGCCAGGTGG
PA3829	CCATGGCGGCATGGCG	TTTCGACGCCACCAGCC
PA3965	TTCATCGTCTGCCTCGCC	GTGAGCCGTCGCCAACAG
PA4070	GAAGACAGGGTATGCACCGG	TCGCCCAATTGCAGCG
PA4513	AACGGGACTACACCGACG	CGGCATTGCTCGGGGTG
PA4842	TCCAGGACGCCGAAAACCT	TATCACCTATCGCCATGAAAGCC
PA4889	TCGGCCTCACGCAGC	GCAAAAGCCCTGCGACC
PA5402	GGCGCCGAAGCCATCTT	AGAGCTTGTGGTTGCTGAGA
pelA	ACGGGCAAAGCAGCCG	TTTCCTGATGAAGTGCGTGAAAC
phzH	TCGAAAAGTTCATACATCGACCG	CAAGGCGAGCGTATCGGT
pslA	CCCAGACTACGGATATTTC	AGGCTATCTACCGACTTCG
pstS	GGCGACGAACGTCAGGGC	TGTGTTTCCAGGCTTTTAGGGGT
qslA	GCACGCTAGTTGGGCACG	AGTTCAATACTTTGGTTGGGCATAC
rocA1	CGCTGGTCGACCTCGC	CAAGGCCAGGCACGATG
triA	GATCCCCTCCACAAGTTTGGAA	CGCACAGGATGGCGGG
vgrG4	AACCAAAGCCGAAGCAACG	GGAAGCCGCGCCGG
vgrG4b	CGCCGCGGTTTTCCGG	ATTCGAGAACCTGCAGGTC
aeR	TGAATGCTTTCACGAGGAAAAACAG	GACGCCCCGGCGTCA
aspA	GACGGGAAAGGCTCCGGTAA	GAGCAGGTCTTTCTCGATACGG
ctpL	AGAGCATGGCCAAGCAGG	GGTGAGCAGGAGCAGGGT
PA0136	CGATGTTGCGAAAATTGCCGG	CACGGACCAGGCTCCCG
PA0730	GCCTCATGTCGCTTCCTCC	CCCGGCCAATAGCCGC
PA0842	TTGACTTCCGGTGGGTAGGTTT	CCATCGACGAACGCCTCAA
PA0959	ATCTGCGTAGGTGCGCAG	CGAAGAGACCAACTGGAATACATAGG
PA1631	GAGTTTCCATCTCAAGCGCG	CACCAGGCTTTCGCGGA
PA1736	CTCCCTTTCGAACGCTTGCAT	GACCGCCCAGCTCAGC
PA1769	CGTCCGAGATGAAGAATGCGG	TACGTACTCTACCAAGGTGATCTCT
PA2428	CGAGCCAGTCGCGACC	CAGCTTAGGCCAAGTCATTCAAATG
PA2548	ATCCACGCGGTCTATCCATC	CGGCTCCAGAGGTCTTTGTC
PA2803	TCGCGGATGCGCAGGTA	AGAGCAGGGCGGTAAAGC
PA3250	ACGGTCTTCCCGGAGGC	TTCGGTCGGGCAGCCT
PA3258	CAAGCCGCAGGACGACG	TGTCCAGGGCGCTCAACT
PA3519	CTCTTCGATAACACTGGATGCG	TTTTCATTGAAGTCTGCGCGC
PA3940	TAATCCTTAACTAAGAACCGGAGGC	CTGCGCGAGGGGCCT
PA5473	AAATCCTCGCCGTTTCCCG	GACGAATGGCCAACCTCGC
panB	CTTCACACTGTTACCGAAAAGCTG	ATCAGGCATGGAAAGGCTCC
phoA	TTTCCTTGAACGAACCGGAATAGAC	GGGGATAACCTGGGGTCATGA
yrfL	CGAGATCGACCATCTCGCC	CAGGCCGCTTGGAACGG
flgB	TTTTCGTTTGCCGGAGAAGC	AAACTGATGCTCATGGCTGC
desT	TCGGCCTCACGCAGC	GCAAAAGCCCTGCGACC
Complemented primer
pAK1900-PA0225	ACACTATAGAATACTCAAGCTTATCGGGAGAAGGCTGTCCTCA	GAGCTCGGTACCCGGGGATCCTTAAGCGTAATCTGGAACATCGTATGGGTATTCGTCGCTGTGGATCACCAC
pAK1900-PA2497	ACACTATAGAATACTCAAGCTTTGCCTTTCAGTGGGAGTGTG	GAGCTCGGTACCCGGGGATCCTTAAGCGTAATCTGGAACATCGTATGGGTAGCGCTCGCCCTGCAAC
pAK1900-PA1413	ACACTATAGAATACTCAAGCTTTTCTGTTTTGGAGAATTAATCGTGGA	GAGCTCGGTACCCGGGGATCCTTAAGCGTAATCTGGAACATCGTATGGGTAAGCCAACGCCGATTCCCG

## Sheet: Supplementary File 1 B
Supplementary File 1 B: Family classification for TF based on DBD domain, related to Figure 1 A, and Figure 1-figure supplement 1 E.
Column A, B, C, D: DBD family catelogies for 371 TFs we used in the study
Column G, H, I, J: 62 RRs list we used in the study.
DBD family catelogies for 301 TFs we used in the study						62 RRs list we used in the study
NO.	Locus ID	Name	Family			No.	Locus ID	Name	DBD detectable or undetectable
1	PA0032		LysR family (113)			1	PA0034		Detectable
2	PA0037	TrpI				2	PA0463	CreB	Detectable
3	PA0056					3	PA0601	AgtR	Detectable
4	PA0123					4	PA0756		Detectable
5	PA0152	PcaQ				5	PA0929		Detectable
6	PA0159					6	PA1099	FleR	Detectable
7	PA0181					7	PA1157		Detectable
8	PA0191					8	PA1179	PhoP	Detectable
9	PA0207					9	PA1335	AauR	Detectable
10	PA0217					10	PA1397		Detectable
11	PA0218					11	PA1437		Detectable
12	PA0233					12	PA1637	KdpE	Detectable
13	PA0272					13	PA1799	ParR	Detectable
14	PA0448	GcdR				14	PA1978	ErbR	Detectable
15	PA0477					15	PA1980	EraR	Detectable
16	PA0479					16	PA2479		Detectable
17	PA0491					17	PA2523	CzcR	Detectable
18	PA0528					18	PA2657	BqsR	Detectable
19	PA0701					19	PA2686	PfeR	Detectable
20	PA0708					20	PA2809	CopR	Detectable
21	PA0739					21	PA3045	RocA2	Detectable
22	PA0784					22	PA3077	CprR	Detectable
23	PA0815					23	PA3204	CpxR	Detectable
24	PA0816					24	PA3714		Detectable
25	PA0876					25	PA3879	NarL	Detectable
26	PA0877					26	PA3948	RocA1	Detectable
27	PA1003	MvfR				27	PA4032		Detectable
28	PA1067					28	PA4132		Detectable
29	PA1128					29	PA4196	BfiR	Detectable
30	PA1138					30	PA4296	PprB	Detectable
31	PA1141					31	PA4381	ColR	Detectable
32	PA1145					32	PA4493	RoxR	Detectable
33	PA1184					33	PA4547	PilR	Detectable
34	PA1201					34	PA4776	PmrA	Detectable
35	PA1223					35	PA4885	IrlR	Detectable
36	PA1264					36	PA4983		Detectable
37	PA1309					37	PA5125	NtrC	Detectable
38	PA1312					38	PA5166	DctD	Detectable
39	PA1328					39	PA5200	AmgR	Detectable
40	PA1399					40	PA5261	AlgR	Detectable
41	PA1413					41	PA5360	PhoB	Detectable
42	PA1570					42	PA5483	AlgB	Detectable
43	PA1738					43	PA5511	MifR	Detectable
44	PA1754	CysB				44	PA3604	ErdR	Detectable
45	PA1826					45	PA4080		Detectable
46	PA1853					46	PA0179		Undetectable
47	PA1859					47	PA0408	PilG	Undetectable
48	PA1961					48	PA0409	PilH	Undetectable
49	PA1998	DhcR				49	PA0414	ChpB	Undetectable
50	PA2054	CynR				50	PA1456	CheY	Undetectable
51	PA2056					51	PA2572		Undetectable
52	PA2076					52	PA2798		Undetectable
53	PA2115					53	PA2881		Undetectable
54	PA2121					54	PA3346	HsbR	Undetectable
55	PA2123					55	PA3349		Undetectable
56	PA2206					56	PA3702	WspR	Undetectable
57	PA2220					57	PA4396		Undetectable
58	PA2258	PtxR				58	PA4777	PmrB	Undetectable
59	PA2267					59	PA5364		Undetectable
60	PA2316					60	PA2818	Arr	Undetectable
61	PA2334					61	PA2889	AtvR	Undetectable
62	PA2383					62	PA4726	CbrB	Undetectable
63	PA2417
64	PA2447
65	PA2469
66	PA2492	MexT
67	PA2497
68	PA2510	CatR
69	PA2534
70	PA2547
71	PA2551
72	PA2601
73	PA2681
74	PA2758
75	PA2834
76	PA2838
77	PA2846
78	PA2848
79	PA2877
80	PA2879
81	PA2921
82	PA2930
83	PA3122
84	PA3124
85	PA3135
86	PA3225
87	PA3321
88	PA3398
89	PA3433
90	PA3565
91	PA3587	MetR
92	PA3594
93	PA3630	GfnR
94	PA3711
95	PA3776
96	PA3778
97	PA3845
98	PA3895
99	PA3995
100	PA4109	AmpR
101	PA4145
102	PA4174
103	PA4203	NmoR
104	PA4902
105	PA4914	AmaR
106	PA4989
107	PA5029
108	PA5179
109	PA5189
110	PA5218
111	PA5293
112	PA5382
113	PA5428
114	PA0163		AraC family (56)
115	PA0248
116	PA0306
117	PA0416	ChpD
118	PA0564
119	PA0780	PruR
120	PA0791
121	PA0831	OruR
122	PA0864
123	PA0893	ArgR
124	PA1109
125	PA1182
126	PA1229
127	PA1235
128	PA1261	LhpR
129	PA1599
130	PA1619
131	PA1713	ExsA
132	PA1850
133	PA2096
134	PA2227	VqsM
135	PA2276
136	PA2281
137	PA2332
138	PA2337	MtlR
139	PA2488
140	PA2489
141	PA2519	XylS
142	PA2556
143	PA2588
144	PA2696
145	PA2704
146	PA2917
147	PA3027
148	PA3094
149	PA3215
150	PA3220
151	PA3269
152	PA3423
153	PA3571	MmsR
154	PA3782
155	PA3830
156	PA3898
157	PA3927
158	PA4070
159	PA4094
160	PA4120
161	PA4184	SouR
162	PA4227	PchR
163	PA4288
164	PA4436
165	PA4787
166	PA5032
167	PA5342
168	PA5389	CdhR
169	PA5324	SphR
170	PA0533		LuxR family (30)
171	PA1136
172	PA1347
173	PA1430	LasR
174	PA1484
175	PA1759
176	PA1760
177	PA2376
178	PA2899
179	PA3420
180	PA3477	RhlR
181	PA3599
182	PA3771
183	PA3921
184	PA4074
185	PA4806
186	PA0034
187	PA0601	AgtR
188	PA1397
189	PA1978	ErbR
190	PA1980	EraR
191	PA3045	RocA2
192	PA3714
193	PA3879	NarL
194	PA3948	RocA1
195	PA4196	BfiR
196	PA4296	PprB
197	PA3604	ErdR
198	PA2586	GacA
199	PA4080
200	PA3192	GltR	OmpR family (24)
201	PA0463	CreB
202	PA0756
203	PA0929
204	PA1157
205	PA1179	PhoP
206	PA1437
207	PA1637	KdpE
208	PA1799	ParR
209	PA2479
210	PA2523	CzcR
211	PA2657	BqsR
212	PA2686	PfeR
213	PA2809	CopR
214	PA3077	CprR
215	PA3204	CpxR
216	PA4032
217	PA4381	ColR
218	PA4776	PmrA
219	PA4885	IrlR
220	PA4983
221	PA5200	AmgR
222	PA4101	BfmR
223	PA5360	PhoB
224	PA0167		TetR family (23)
225	PA0243
226	PA0294	AguR
227	PA0436
228	PA0475
229	PA0828
230	PA0839
231	PA1226
232	PA1241
233	PA1290
234	PA1315
235	PA1403
236	PA1836
237	PA2196
238	PA2270
239	PA2766
240	PA2957
241	PA3006	PsrA
242	PA3034
243	PA3133	SawR
244	PA3699
245	PA3973
246	PA4831
247	PA0120		GntR family (23)
248	PA0268
249	PA0797
250	PA1142
251	PA1269
252	PA1520
253	PA1526
254	PA1627
255	PA2032
256	PA2100
257	PA2802
258	PA2897
259	PA3381
260	PA3757	NagR
261	PA4165
262	PA4185
263	PA4769
264	PA4906
265	PA5283
266	PA5356	GlcC
267	PA5431
268	PA5525
269	PA4132
270	PA0155	PcaR	Two DNA binding domains (19)
271	PA0236
272	PA0367	LaoR
273	PA1015
274	PA1283
275	PA1380
276	PA1504
277	PA1630
278	PA1864
279	PA2010	HmgR
280	PA2047	CmrA
281	PA2118	Ada
282	PA2299
283	PA3174	HutR
284	PA3249
285	PA4157
286	PA4984
287	PA5059
288	PA5374	BetI
289	PA1097	FleQ	Fis family (14)
290	PA1196	DdaR
291	PA1945
292	PA2005	HbcR
293	PA4021
294	PA4147	AcoR
295	PA1099	FleR
296	PA1335	AauR
297	PA4493	RoxR
298	PA4547	PilR
299	PA5125	NtrC
300	PA5166	DctD
301	PA5483	AlgB
302	PA5511	MifR
303	PA0403	PyrR	Undetectable (13)
304	PA0707	ToxR
305	PA2354
306	PA2359	Sfa3
307	PA3932
308	PA4315	MvaT
309	PA4581	RtcR
310	PA4600	NfxB
311	PA4916	NrtR
312	PA5255	AlgQ
313	PA4726	CbrB
314	PA5499	Zur
315	PA1431	RsaL
316	PA0048		Cro/CI family (13)
317	PA0225
318	PA0535
319	PA0611	PrtR
320	PA0906	AlpR
321	PA1359
322	PA1884
323	PA2312
324	PA3260
325	PA4077
326	PA4987
	PA0515
	PA5403
327	PA2028		AsnC family (6)
328	PA2246	BkdR
329	PA2577
330	PA3965
331	PA4508
332	PA4784
333	PA0942		MarR family (9)
334	PA1285
335	PA1653
336	PA3067
337	PA3341
338	PA1603
339	PA3458
340	PA4135
341	PA5157
342	PA2718		MerR family (4)
343	PA3689
344	PA4659
345	PA5116
346	PA0275		CRP family (3)
347	PA0527	Dnr
348	PA0652	Vfr
349	PA2259	PtxS	LacI family (2)
350	PA2320	GntR
351	PA3184		RpiR family (2)
352	PA5438
353	PA1490		DeoR family (2)
354	PA5550	GlmR
355	PA3508		IclR family (2)
356	PA4341
357	PA0279		ArsR family (2)
358	PA0547
359	PA0873	PhhR	TyrR family (2)
360	PA2449	GcsR
361	PA1544	Anr	CRP family (1)
362	PA2692		Rrf2 family (1)
363	PA1704	PcrR	LcrR family (1)
364	PA0610	PrtN	PyocinActivator (1)
365	PA3864	DauR	DauR-like family (1)
366
367
368	PA4499	PsdR	Cro/CI family(1)
369	PA5261	AlgR	LytTr family (1)
370	PA3385	AmrZ	Arc-like family (1)
371	PA4462	RpoN	Sigma factor 54 (1)

## Sheet: Supplementary File 1 C
Supplementary File 1 C: Number of proteins in each family, the successful rate of HT-SELEX in each family, related to Figure 1, Figure 1-figure supplement 1, and Supplementary File 1 A-B.
Column B: The family name
Column C: The TF number of each family
Column D: The ratio for each family TFs
Column E: Number of TFs without HT-SELEX Motifs
Column F: Number of TFs with HT-SELEX Motifs
Column G: Successful rate of HT-SELEX for each family
No.	Family	Number of proteins	Ratio (No. of TF for each family/371)	Number of TFs without HT-SELEX Motifs	Number of TFs with HT-SELEX Motifs	Successful rate of HT-SELEX for each family
1	LysR family	113	0.304582	54	59	0.522124
2	AraC family	56	0.150943	36	20	0.357143
3	LuxR family	30	0.0808625	22	8	0.266667
4	OmpR family	24	0.06469	7	17	0.708333
5	TetR family	23	0.0619946	12	11	0.478261
6	GntR family	23	0.0619946	9	14	0.608696
7	Two domains	19	0.0512129	12	7	0.368421
8	Fis family	14	0.0377358	4	10	0.714286
9	Undetectable	13	0.0350404	5	8	0.615385
10	Cro/CI family	13	0.0350404	4	9	0.692308
11	MarR family	9	0.0242588	4	5	0.555556
12	AsnC family	6	0.0161725	4	2	0.333333
13	MerR family	4	0.0107817	3	1	0.25
14	CRP family	3	0.00808625	1	2	0.666667
15	ArsR family	2	0.00539084	1	1	0.5
16	TyrR family	2	0.00539084	2	0	0
17	RpiR family	2	0.00539084	1	1	0.5
18	DeoR family	2	0.00539084	1	1	0.5
19	IclR family	2	0.00539084	2	0	0
20	LacI family	2	0.00539084	1	1	0.5
21	CRP family	1	0.00269542	1	0	0
22	DauR-like family	1	0.00269542	0	1	1
23	AsnC family	1	0.00269542	1	0	0
24	LcrR family	1	0.00269542	0	1	1
25	Pyocin activator	1	0.00269542	1	0	0
26	Rrf2 family	1	0.00269542	1	0	0
27	Arc-like family	1	0.00269542	0	1	1
28	LytTr family	1	0.00269542	0	1	1
29	Sigma factor 54	1	0.00269542	0	1	1
	Sum	371	1	189	182
					0.434066

## Sheet: Supplementary File 1 D
Supplementary File 1 D: The following primers were used for building the HT-SELEX libraries in this study, related to Figure 1 A.
Column A: The name of primer for HT-SELEX
Column B: The primer sequence for HT-SELEX
1. Primers for BGI system
BGI-insert-oligo	ATGGCTACGATCCGACTTNNNNNNNNNNNNNNNNNNNNNNNNNNNNNNNNNNNNNNNNAAGTCGGAGGCCAAGCGGTCTTAGGAAGACAA
BGI-system-F	/5Phos/ GAACGACATGGCTACGATCCGACTT
BGI-system-R	TGTGAGCCAAGGAGTTG
Barcode 1R	TGTGAGCCAAGGAGTTG ATCGGACCTA TTGTCTTCCTAAGACCGC
Barcode 2R	TGTGAGCCAAGGAGTTG GATTCCGTCC TTGTCTTCCTAAGACCGC
Barcode 3R	TGTGAGCCAAGGAGTTG CGGCAGTAAG TTGTCTTCCTAAGACCGC
Barcode 4R	TGTGAGCCAAGGAGTTG TCAATTAGGT TTGTCTTCCTAAGACCGC
Barcode 13R	TGTGAGCCAAGGAGTTG CGGATTGCCG TTGTCTTCCTAAGACCGC
Barcode 14R	TGTGAGCCAAGGAGTTG GAATCCTGAT TTGTCTTCCTAAGACCGC
Barcode 15R	TGTGAGCCAAGGAGTTG TCTGGAATGA TTGTCTTCCTAAGACCGC
Barcode 16R	TGTGAGCCAAGGAGTTG ATCCAGCATC TTGTCTTCCTAAGACCGC
Barcode 25R	TGTGAGCCAAGGAGTTG TTGTCCTCTA TTGTCTTCCTAAGACCGC
Barcode 26R	TGTGAGCCAAGGAGTTG ATTCGCTAGG TTGTCTTCCTAAGACCGC
Barcode 28R	TGTGAGCCAAGGAGTTG ACAGCTCAGC TTGTCTTCCTAAGACCGC
Barcode 29R	TGTGAGCCAAGGAGTTG TATCTAGGTT TTGTCTTCCTAAGACCGC
Barcode 30R	TGTGAGCCAAGGAGTTG GAGATGGCAA TTGTCTTCCTAAGACCGC
Barcode 32R	TGTGAGCCAAGGAGTTG GCCGATAGCG TTGTCTTCCTAAGACCGC
Barcode 33R	TGTGAGCCAAGGAGTTG CCATCGTTGC TTGTCTTCCTAAGACCGC
Barcode 34R	TGTGAGCCAAGGAGTTG TGAACGATTA TTGTCTTCCTAAGACCGC
Barcode 35R	TGTGAGCCAAGGAGTTG TAGAGCGAAC TTGTCTTCCTAAGACCGC
Barcode 36R	TGTGAGCCAAGGAGTTG ATGTGTGAGA TTGTCTTCCTAAGACCGC
Barcode 37R	TGTGAGCCAAGGAGTTG ATCCTAACAG TTGTCTTCCTAAGACCGC
Barcode 38R	TGTGAGCCAAGGAGTTG CGCGTCTGCG TTGTCTTCCTAAGACCGC
Barcode 39R	TGTGAGCCAAGGAGTTG GATGATCCTT TTGTCTTCCTAAGACCGC
Barcode 41R	TGTGAGCCAAGGAGTTG ATGCATCTAA TTGTCTTCCTAAGACCGC
Barcode 42R	TGTGAGCCAAGGAGTTG AGCTCTGGAC TTGTCTTCCTAAGACCGC
Barcode 43R	TGTGAGCCAAGGAGTTG CTATCACGTG TTGTCTTCCTAAGACCGC
Barcode 44R	TGTGAGCCAAGGAGTTG GGACTAGTGG TTGTCTTCCTAAGACCGC
Barcode 45R	TGTGAGCCAAGGAGTTG GCCAAGTCCA TTGTCTTCCTAAGACCGC
Barcode 46R	TGTGAGCCAAGGAGTTG CCTGTCAAGC TTGTCTTCCTAAGACCGC
Barcode 47R	TGTGAGCCAAGGAGTTG TAGAGGTCTT TTGTCTTCCTAAGACCGC
Barcode 48R	TGTGAGCCAAGGAGTTG TATGGCAACT TTGTCTTCCTAAGACCGC
Barcode 49R	TGTGAGCCAAGGAGTTG CTGCGTACAT TTGTCTTCCTAAGACCGC
Barcode 50R	TGTGAGCCAAGGAGTTG ATCTCATTAA TTGTCTTCCTAAGACCGC
Barcode 51R	TGTGAGCCAAGGAGTTG AAGTGGCGCA TTGTCTTCCTAAGACCGC
Barcode 52R	TGTGAGCCAAGGAGTTG GGCCTTAATG TTGTCTTCCTAAGACCGC
Barcode 53R	TGTGAGCCAAGGAGTTG TCTGAGGCGG TTGTCTTCCTAAGACCGC
Barcode 55R	TGTGAGCCAAGGAGTTG GATAACCGGC TTGTCTTCCTAAGACCGC
Barcode 56R	TGTGAGCCAAGGAGTTG TCAATATTCC TTGTCTTCCTAAGACCGC
Barcode 57R	TGTGAGCCAAGGAGTTG TCCGTTGAAT TTGTCTTCCTAAGACCGC
Barcode 58R	TGTGAGCCAAGGAGTTG CAGTACAGTT TTGTCTTCCTAAGACCGC
Barcode 59R	TGTGAGCCAAGGAGTTG ATTGAGGTAC TTGTCTTCCTAAGACCGC
Barcode 60R	TGTGAGCCAAGGAGTTG ATTAGAAGTC TTGTCTTCCTAAGACCGC
Barcode 61R	TGTGAGCCAAGGAGTTG CAACGCTTCA TTGTCTTCCTAAGACCGC
Barcode 62R	TGTGAGCCAAGGAGTTG GGATCGCACG TTGTCTTCCTAAGACCGC
Barcode 63R	TGTGAGCCAAGGAGTTG TGCCTTCCGA TTGTCTTCCTAAGACCGC
Barcode 64R	TGTGAGCCAAGGAGTTG GCGACATCGG TTGTCTTCCTAAGACCGC
Barcode 65R	TGTGAGCCAAGGAGTTG CATTCTAAGT TTGTCTTCCTAAGACCGC
Barcode 66R	TGTGAGCCAAGGAGTTG CAGGCTTGGA TTGTCTTCCTAAGACCGC
Barcode 67R	TGTGAGCCAAGGAGTTG ATCATCGTCT TTGTCTTCCTAAGACCGC
Barcode 68R	TGTGAGCCAAGGAGTTG GTCTTGTGAG TTGTCTTCCTAAGACCGC
Barcode 69R	TGTGAGCCAAGGAGTTG AGTAGGAACG TTGTCTTCCTAAGACCGC
Barcode 70R	TGTGAGCCAAGGAGTTG TCACAACCAC TTGTCTTCCTAAGACCGC
Barcode 71R	TGTGAGCCAAGGAGTTG GCAGGCCTTC TTGTCTTCCTAAGACCGC
Barcode 72R	TGTGAGCCAAGGAGTTG TGGCAAGCTA TTGTCTTCCTAAGACCGC
Barcode 73R	TGTGAGCCAAGGAGTTG GAGCATTGTC TTGTCTTCCTAAGACCGC
Barcode 74R	TGTGAGCCAAGGAGTTG TGTGATTAGC TTGTCTTCCTAAGACCGC
Barcode 75R	TGTGAGCCAAGGAGTTG CCTATGGACT TTGTCTTCCTAAGACCGC
Barcode 76R	TGTGAGCCAAGGAGTTG TAGGCGATAG TTGTCTTCCTAAGACCGC
Barcode 77R	TGTGAGCCAAGGAGTTG AGACCACGAT TTGTCTTCCTAAGACCGC
Barcode 78R	TGTGAGCCAAGGAGTTG GTATTAGCCA TTGTCTTCCTAAGACCGC
Barcode 79R	TGTGAGCCAAGGAGTTG CTCTGCACTG TTGTCTTCCTAAGACCGC
Barcode 80R	TGTGAGCCAAGGAGTTG ACCAGCCTGA TTGTCTTCCTAAGACCGC
Barcode 81R	TGTGAGCCAAGGAGTTG GCGTGAGTAT TTGTCTTCCTAAGACCGC
Barcode 82R	TGTGAGCCAAGGAGTTG CGCGGAGCAT TTGTCTTCCTAAGACCGC
Barcode 83R	TGTGAGCCAAGGAGTTG CAAGTTCACA TTGTCTTCCTAAGACCGC
Barcode 84R	TGTGAGCCAAGGAGTTG AGCACCTCTC TTGTCTTCCTAAGACCGC
Barcode 85R	TGTGAGCCAAGGAGTTG TTACAGTGCA TTGTCTTCCTAAGACCGC
Barcode 86R	TGTGAGCCAAGGAGTTG TTGCCTAGGC TTGTCTTCCTAAGACCGC
Barcode 87R	TGTGAGCCAAGGAGTTG GCTATGATGG TTGTCTTCCTAAGACCGC
Barcode 88R	TGTGAGCCAAGGAGTTG AATTACCATG TTGTCTTCCTAAGACCGC
Barcode 89R	TGTGAGCCAAGGAGTTG AGACATGGTG TTGTCTTCCTAAGACCGC
Barcode 90R	TGTGAGCCAAGGAGTTG CCAGACATAT TTGTCTTCCTAAGACCGC
Barcode 91R	TGTGAGCCAAGGAGTTG ACGCTTCCTT TTGTCTTCCTAAGACCGC
Barcode 92R	TGTGAGCCAAGGAGTTG GACGTCTTGA TTGTCTTCCTAAGACCGC
Barcode 93R	TGTGAGCCAAGGAGTTG TACTGAGCGG TTGTCTTCCTAAGACCGC
Barcode 94R	TGTGAGCCAAGGAGTTG TGTACACACC TTGTCTTCCTAAGACCGC
Barcode 95R	TGTGAGCCAAGGAGTTG CTTACGTGAA TTGTCTTCCTAAGACCGC
Barcode 96R	TGTGAGCCAAGGAGTTG GTGTGGAACC TTGTCTTCCTAAGACCGC
Barcode 97R	TGTGAGCCAAGGAGTTG AAGAATACCT TTGTCTTCCTAAGACCGC
Barcode 98R	TGTGAGCCAAGGAGTTG GTTGCATTCG TTGTCTTCCTAAGACCGC
Barcode 99R	TGTGAGCCAAGGAGTTG CGCCGTTGAA TTGTCTTCCTAAGACCGC
Barcode 100R	TGTGAGCCAAGGAGTTG TTCCGCCGAG TTGTCTTCCTAAGACCGC
Barcode 101R	TGTGAGCCAAGGAGTTG CCATTACCGT TTGTCTTCCTAAGACCGC
Barcode 102R	TGTGAGCCAAGGAGTTG ACGTCGGATC TTGTCTTCCTAAGACCGC
Barcode 103R	TGTGAGCCAAGGAGTTG TGTATCGTGA TTGTCTTCCTAAGACCGC
Barcode 104R	TGTGAGCCAAGGAGTTG GAAGAGAATC TTGTCTTCCTAAGACCGC
Barcode 114R	TGTGAGCCAAGGAGTTG CTGACTCTGG TTGTCTTCCTAAGACCGC
Barcode 115R	TGTGAGCCAAGGAGTTG ACTGCCTGTT TTGTCTTCCTAAGACCGC
Barcode 116R	TGTGAGCCAAGGAGTTG GTCATGGAGC TTGTCTTCCTAAGACCGC
Barcode 117R	TGTGAGCCAAGGAGTTG GGATAGACAT TTGTCTTCCTAAGACCGC
Barcode 121R	TGTGAGCCAAGGAGTTG TTGATCAAGG TTGTCTTCCTAAGACCGC
Barcode 122R	TGTGAGCCAAGGAGTTG TGCCACTTCC TTGTCTTCCTAAGACCGC
Barcode 123R	TGTGAGCCAAGGAGTTG GTAGAATGTT TTGTCTTCCTAAGACCGC
Barcode 124R	TGTGAGCCAAGGAGTTG GACTCGCGTC TTGTCTTCCTAAGACCGC
Barcode 125R	TGTGAGCCAAGGAGTTG AGTGTTATAG TTGTCTTCCTAAGACCGC
Barcode 126R	TGTGAGCCAAGGAGTTG ACACGAGACT TTGTCTTCCTAAGACCGC
Barcode 127R	TGTGAGCCAAGGAGTTG CATAGGCCGA TTGTCTTCCTAAGACCGC
Barcode 128R	TGTGAGCCAAGGAGTTG CCGTCTGCAA TTGTCTTCCTAAGACCGC
2. Primers for Illumina system
SELEX-F	AATGATACGGCGACCACCGAGATCTACAC
SELEX-R	CAAGCAGAAGACGGCATACGAGAT
N50N70	TCCCTACACGAC GCTCTTCCGATCT NNNNNNNNNNNNNNNNNNNNNNNNNNNNNNNNNNNNNNNN GATCGGAAGAGC ACACGTCTGAACTCCAGTCAC
N501	AATGATACGGCGACCACCGAGATCTACAC TAGATCGC ACACTCTTTCCCTACACGAC GCTCTTCCGATCT
N502	AATGATACGGCGACCACCGAGATCTACAC CTCTCTAT ACACTCTTTCCCTACACGAC GCTCTTCCGATCT
N503	AATGATACGGCGACCACCGAGATCTACAC TATCCTCT ACACTCTTTCCCTACACGAC GCTCTTCCGATCT
N504	AATGATACGGCGACCACCGAGATCTACAC AGAGTAGA ACACTCTTTCCCTACACGAC GCTCTTCCGATCT
N505	AATGATACGGCGACCACCGAGATCTACAC GTAAGGAG ACACTCTTTCCCTACACGAC GCTCTTCCGATCT
N506	AATGATACGGCGACCACCGAGATCTACAC ACTGCATA ACACTCTTTCCCTACACGAC GCTCTTCCGATCT
N507	AATGATACGGCGACCACCGAGATCTACAC AAGGAGTA ACACTCTTTCCCTACACGAC GCTCTTCCGATCT
N508	AATGATACGGCGACCACCGAGATCTACAC CTAAGCCT ACACTCTTTCCCTACACGAC GCTCTTCCGATCT
N701	CAAGCAGAAGACGGCATACGAGAT TCGCCTTA GTGACTGGAGTTCAGACGTGT
N702	CAAGCAGAAGACGGCATACGAGAT CTAGTACG GTGACTGGAGTTCAGACGTGT
N703	CAAGCAGAAGACGGCATACGAGAT TTCTGCCT GTGACTGGAGTTCAGACGTGT
N704	CAAGCAGAAGACGGCATACGAGAT GCTCAGGA GTGACTGGAGTTCAGACGTGT
N705	CAAGCAGAAGACGGCATACGAGAT AGGAGTCC GTGACTGGAGTTCAGACGTGT
N706	CAAGCAGAAGACGGCATACGAGAT CATGCCTA GTGACTGGAGTTCAGACGTGT
N707	CAAGCAGAAGACGGCATACGAGAT GTAGAGAG GTGACTGGAGTTCAGACGTGT
N708	CAAGCAGAAGACGGCATACGAGAT CCTCTCTG GTGACTGGAGTTCAGACGTGT
N709	CAAGCAGAAGACGGCATACGAGAT AGCGTAGC GTGACTGGAGTTCAGACGTGT
N710	CAAGCAGAAGACGGCATACGAGAT CAGCCTCG GTGACTGGAGTTCAGACGTGT
N711	CAAGCAGAAGACGGCATACGAGAT TGCCTCTT GTGACTGGAGTTCAGACGTGT
N712	CAAGCAGAAGACGGCATACGAGAT TCCTCTAC GTGACTGGAGTTCAGACGTGT
SA501	AATGATACGGCGACCACCGAGATCTACAC ATCGTACG ACACTCTTTCCCTACACGAC GCTCTTCCGATCT
SA502	AATGATACGGCGACCACCGAGATCTACAC ACTATCTG ACACTCTTTCCCTACACGAC GCTCTTCCGATCT
SA503	AATGATACGGCGACCACCGAGATCTACAC TAGCGAGT ACACTCTTTCCCTACACGAC GCTCTTCCGATCT
SA504	AATGATACGGCGACCACCGAGATCTACAC CTGCGTGT ACACTCTTTCCCTACACGAC GCTCTTCCGATCT
SA505	AATGATACGGCGACCACCGAGATCTACAC TCATCGAG ACACTCTTTCCCTACACGAC GCTCTTCCGATCT
SA506	AATGATACGGCGACCACCGAGATCTACAC CGTGAGTG ACACTCTTTCCCTACACGAC GCTCTTCCGATCT
SA507	AATGATACGGCGACCACCGAGATCTACAC GGATATCT ACACTCTTTCCCTACACGAC GCTCTTCCGATCT
SA508	AATGATACGGCGACCACCGAGATCTACAC GACACCGT ACACTCTTTCCCTACACGAC GCTCTTCCGATCT
SA701	CAAGCAGAAGACGGCATACGAGAT CGAGAGTT GTGACTGGAGTTCAGACGTGT
SA702	CAAGCAGAAGACGGCATACGAGAT GACATAGT GTGACTGGAGTTCAGACGTGT
SA703	CAAGCAGAAGACGGCATACGAGAT ACGCTACT GTGACTGGAGTTCAGACGTGT
SA704	CAAGCAGAAGACGGCATACGAGAT ACTCACAG GTGACTGGAGTTCAGACGTGT
SA705	CAAGCAGAAGACGGCATACGAGAT TGAGTAGG GTGACTGGAGTTCAGACGTGT
SA706	CAAGCAGAAGACGGCATACGAGAT CTGCGTAG GTGACTGGAGTTCAGACGTGT
SA707	CAAGCAGAAGACGGCATACGAGAT TAGTCTCC GTGACTGGAGTTCAGACGTGT
SA708	CAAGCAGAAGACGGCATACGAGAT CGAGCGAC GTGACTGGAGTTCAGACGTGT
SA709	CAAGCAGAAGACGGCATACGAGAT ACTACGAC GTGACTGGAGTTCAGACGTGT
SA710	CAAGCAGAAGACGGCATACGAGAT GTCTGCTA GTGACTGGAGTTCAGACGTGT
SA711	CAAGCAGAAGACGGCATACGAGAT GTCTATGA GTGACTGGAGTTCAGACGTGT
SA712	CAAGCAGAAGACGGCATACGAGAT TATAGCGA GTGACTGGAGTTCAGACGTGT
P501	AATGATACGGCGACCACCGAGATCTACAC GAGACCTT ACACTCTTTCCCTACACGAC GCTCTTCCGATCT
P502	AATGATACGGCGACCACCGAGATCTACAC GCGCAATT ACACTCTTTCCCTACACGAC GCTCTTCCGATCT
P503	AATGATACGGCGACCACCGAGATCTACAC GTGACACT ACACTCTTTCCCTACACGAC GCTCTTCCGATCT
P504	AATGATACGGCGACCACCGAGATCTACAC GAGACTTC ACACTCTTTCCCTACACGAC GCTCTTCCGATCT
P505	AATGATACGGCGACCACCGAGATCTACAC AAGTCGTC ACACTCTTTCCCTACACGAC GCTCTTCCGATCT
P506	AATGATACGGCGACCACCGAGATCTACAC GCAACTTG ACACTCTTTCCCTACACGAC GCTCTTCCGATCT
P507	AATGATACGGCGACCACCGAGATCTACAC GACATTCG ACACTCTTTCCCTACACGAC GCTCTTCCGATCT
P508	AATGATACGGCGACCACCGAGATCTACAC GCCAGTTA ACACTCTTTCCCTACACGAC GCTCTTCCGATCT
