# Supplementary material for: An atlas of the binding specificities of transcription factors in Pseudomonas aeruginosa directs prediction of novel regulators in virulence
Source: eLife. 2021 Mar 29;10:e61885. doi: 10.7554/eLife.61885 (PMC8041468; doi:10.7554/eLife.61885)
Supplement: Supplementary file 2. [file elife-61885-supp2.xlsx]

## Sheet: Supplementary File 2
Supplementary File 2 | PWM models related to Figure 1, Figure 2, Figure 3 D, Figure 2-figure supplement 1 and Figure 2-figure supplement 2.
This table contains background subtracted PWMs for all factors analyzed. First line for each factor contains information as follows:
Column A：symbol	Locus tag
Column B：TF name	gene name
Column C：clone type	Type of construct used: full-length
Column D：seed	Sequence used to identify subsequences to be included in the model
Column E：cycle	SELEX cycle used to construct the model; previous cycle was used as background
Column F：site type	number of repeats of a subsequence (momer, dimer, trimer)
Column G：comment	comment field
Models marked green are biological replicates or technical replicates in this study
symbol	TF name	clone type	seed	cycle	site type	comment
1	2	4	5	6	7	8	9	10	11	12	13	14	15	16	17	18	19	20	21	22	23	24	25	26	27	28	29	30
PA3385	AmrZ	full	RTRRTGGCNNNNNGCCAYYAY	3	dimeric
A	183938	21448	87634	153982	420	26145	133	247	160947	74876	184636	156968	34964	74	4553	283	194051	173	3455	193853	29994
C	48871	24113	370	57682	194	169	184	194096	51319	50030	9377	68897	2229	131	194093	194051	269	113025	169060	2450	77400
G	77399	2450	169124	113068	269	194043	194044	131	2229	68896	9377	50032	51322	194084	184	169	194	53868	370	24106	48873
T	29988	192419	3455	173	194104	283	4553	74	34968	156959	184689	74870	160954	249	133	26144	420	155636	87647	21441	185607
PA4101	BfmR	full	TGTACNGTACA	4	dimeric
A	460	547	46	680	471	360	475	186	673	227	682
C	540	121	57	154	682	320	308	45	48	678	377
G	365	678	47	45	308	320	681	154	57	121	540
T	681	227	672	186	474	360	472	681	46	542	460
PA4101	BfmR	full	NGTACNNNNNNGTACN	4	dimeric
A	952	2717	551	3042	1563	2107	1194	1919	1582	1852	1014	2102	487	3052	1632	2251
C	1489	1953	357	349	3033	634	871	509	995	1384	1465	1585	180	363	3028	729
G	732	3048	363	180	1587	1467	1392	990	509	872	636	3044	350	354	1953	1474
T	2259	1619	3045	486	2110	1018	1857	1581	1921	1189	2105	1573	3047	551	2722	953
PA2588	CdpR	full	TGCGGNNNNNCCTCC	3	momeric
A	51	60	1	1	27	68	578	392	622	430	1	1	1	1	21
C	6	24	1299	1	1	533	90	259	330	322	1302	1303	5	1303	1303
G	1	1303	1	1304	1303	329	453	473	246	512	3	1	1	1	18
T	1302	19	1	1	15	372	183	179	106	39	5	5	1303	1	48
PA1754	CysB	full	NTTATANNNNTATAAN	2	dimeric
A	82	238	292	421	60	421	237	181	61	301	169	421	76	421	421	78
C	124	161	217	176	45	85	53	150	306	20	137	57	65	72	257	383
G	383	256	72	65	57	137	20	306	150	53	85	45	176	217	161	124
T	78	421	421	76	421	169	301	61	181	237	421	60	421	292	238	82
PA1713	ExsA	full	TTTTTNNNNNNNAAAAA	3	dimeric
A	77	26	35	58	107	45	51	56	70	76	77	67	75	74	72	71	69
C	25	1	1	1	7	5	6	9	13	9	16	11	9	7	15	19	50
G	50	19	15	7	7	10	18	9	13	8	7	6	7	1	1	1	25
T	72	69	71	72	71	66	77	79	70	56	53	45	108	59	35	27	79
PA1097	FleQ	full	GCGTCAANNNNTTGACGC	2	dimeric
A	445	198	9	115	6	4271	4271	4265	2985	1298	1289	6	5	8	4271	1	959	10
C	5815	4271	6	68	4271	1	5	10	612	1	343	2	1	8	32	4271	14	4271
G	4271	14	4271	32	8	1	2	343	1	612	10	5	1	4271	68	6	4271	5815
T	10	959	1	4271	8	5	6	1289	1298	2985	4265	4271	4271	6	115	9	198	445
PA2586	GacA	full	RTRRTGGCANNNTGCCAYYAY	3	dimeric
A	68300	204	65242	815	1227	39	69	606	68313	65276	68281	1053	117	48	37	1637	68313	58	207	68314	69
C	130	10990	61	1110	42	9	50	68313	111	716	33	2403	343	185	68315	68315	1560	67550	68298	2038	66015
G	66012	2038	68304	67555	1560	68313	68312	185	343	2403	33	716	111	68315	50	9	42	1110	61	10990	130
T	69	68309	207	58	68314	1637	37	48	117	1053	68282	65278	68315	606	69	39	1227	815	65242	204	68301
PA2492	MexT	full	TGTAANNNNNNNCYTAC	2	momeric
A	38	37	1	809	809	1	61	48	274	178	100	136	109	12	3	811	1
C	186	34	1	265	154	9	455	632	49	30	280	227	811	515	160	4	810
G	67	809	1	100	174	471	174	63	46	257	126	425	35	73	187	30	61
T	809	15	811	13	50	335	164	83	489	393	320	69	1	297	811	29	36
PA0032		full	CTGGTCTAGACCAG	3	dimeric
A	1	1	1	1	2	760	2	2495	1	2495	1	1	2495	382
C	2495	2	1	1	3	2495	1	2	1	2	2495	2495	1	337
G	337	1	2495	2495	2	1	2	1	2495	3	1	1	2	2495
T	382	2495	1	1	2495	1	2495	2	760	2	1	1	1	1
PA0037	trpI	full	GTGANNNNNTCAC	4	dimeric
A	249	110	443	2233	457	694	1310	1213	777	352	692	2272	456
C	127	133	939	544	1142	1230	991	919	1639	126	2260	51	2264
G	2230	56	2233	128	1614	913	985	1222	1161	542	938	140	127
T	475	2233	683	341	785	1220	1315	694	465	2265	446	112	239
PA0048		full	CGGTNNNACCG	3	dimeric
A	84	132	57	60	170	200	2	225	1	210	316
C	223	31	77	225	164	21	5	9	223	223	107
G	106	215	219	13	5	21	164	213	85	39	221
T	306	216	1	217	2	204	170	72	65	129	87
PA0120		full	ACCGGTNNNACCGGT	4	dimeric
A	1142	35	261	1244	372	849	727	448	429	1142	1	658	228	193	873
C	155	1142	1142	60	11	1033	705	693	1	663	1142	1142	167	1	906
G	906	1	167	1142	1142	663	1	693	705	1033	11	60	1142	1142	155
T	873	193	261	658	1	1142	429	448	727	849	372	1244	261	35	1142
PA0123		full	ATTCNTAAG	4	momeric
A	4733	280	551	4201	851	359	4732	4805	543
C	210	1251	468	4764	252	594	272	7	870
G	523	243	445	2078	2413	981	109	1	4584
T	821	4695	4619	228	1532	4633	3541	1	935
PA0159		full	GNWAYGTTATAACRTWNC	4	dimeric
A	62	112	221	297	2	17	85	5	297	1	297	297	1	194	1	205	171	29
C	75	167	24	5	235	1	17	1	1	1	7	5	297	10	1	49	74	297
G	297	74	49	1	10	297	5	7	1	1	1	17	1	235	5	24	167	75
T	29	171	205	1	194	1	297	297	1	297	5	85	17	2	297	221	112	62
PA0181		full	TCGATACNNNNNGTATCGA	4	dimeric
A	233	129	277	1192	494	1192	1	725	860	712	374	469	33	1	1192	7	1	32	1192
C	50	1192	275	1	23	142	1192	803	218	481	655	27	875	8	14	257	1192	471	13
G	13	471	1192	257	14	8	875	27	655	481	218	803	1192	142	23	1	275	1192	50
T	1192	32	1	7	1192	1	33	469	374	712	860	725	1	1192	494	1192	277	129	233
PA0191		full	AACTANNNNNNTAGTT	4	dimeric
A	393	393	15	44	393	364	173	9	349	1	178	3	393	1	5	273
C	55	26	393	17	53	166	385	212	1	16	1	31	97	65	1	38
G	38	1	65	97	31	1	16	1	212	385	166	53	17	393	26	55
T	273	5	1	393	3	178	1	349	9	173	364	393	44	15	393	393
PA0225		full	GACACNNNGTGTC	4	dimeric
A	139	470	74	472	105	294	311	220	128	8	90	23	165
C	93	14	472	14	473	152	163	130	71	83	25	10	474
G	471	10	25	83	71	130	163	152	471	14	472	14	93
T	165	23	90	8	128	219	311	294	101	471	70	471	142
PA0225		full	GACACNNNNGTGTC	4	dimeric
A	57	164	53	163	58	104	82	82	84	49	57	1	44	45
C	53	40	164	1	164	44	50	73	58	59	113	35	7	164
G	164	7	35	113	59	58	73	50	44	164	1	164	40	53
T	45	44	1	57	49	84	82	82	104	58	164	53	164	57
PA0236		full	YTGACCNNNNGGTCAR	4	dimeric
A	51	2	114	2547	54	1	741	1285	740	861	1052	21	395	15	2783	2355
C	1574	15	1	3	2777	2777	1405	733	2040	1510	4	1	23	2783	18	11
G	11	18	2555	23	1	4	1510	2040	727	1411	2783	2783	3	1	15	1574
T	2356	2783	15	395	21	1052	861	740	1295	741	1	54	2772	114	2	51
PA0248		full	DCCAHNDTGGH	4	dimeric
A	1757	91	390	3355	3055	3361	1841	1	1	273	2032
C	428	3383	3424	39	890	411	13	1	1	1	2508
G	2443	10	1	1	21	416	903	63	3467	3367	419
T	2005	276	1	1	1796	3383	3065	3477	334	176	1818
PA0268		full	DCCAHWWTGGH	4	dimeric
A	30431	3693	3361	58756	43789	51812	40541	1298	2263	3869	30709
C	9644	58731	59236	1401	18520	8809	1115	1644	1248	2341	46461
G	45125	2321	1363	4743	994	8923	18643	1348	59319	58317	9612
T	31546	3917	2649	1783	36140	55836	52581	58956	3045	3862	31170
PA0275		full	TRTTANNNNNNNTAAYA	4	dimeric
A	15	2525	970	65	3331	3298	3272	1617	3057	3227	1841	1	75	3331	3331	21	3322
C	43	77	1	12	1	1609	551	22	269	270	621	549	18	73	137	2888	71
G	71	2888	137	73	18	549	621	270	269	22	551	1609	1	15	1	77	43
T	3331	21	3331	3331	75	1	1841	3227	3057	1617	3272	3298	3331	56	970	2525	15
PA0294	aguR	full	NYVGATATCBRWN	4	dimeric
A	790	279	679	740	2027	28	2041	1088	396	201	949	1136	599
C	602	1492	941	434	82	946	264	551	2034	1034	313	798	1038
G	580	378	1051	2055	387	202	825	193	660	919	1564	738	501
T	630	1032	182	372	1086	2025	117	2039	740	707	239	1440	646
PA0436		full	TKWACTAAMYRKTTAGTWMA	4	dimeric
A	334	1	3864	3865	28	17	3865	3865	1	1	3865	25	90	1	3865	36	1	3863	3	3865
C	1656	17	15	13	3865	1	428	2658	3866	4	8	1	110	1	1945	1	1	263	3866	2323
G	2323	3866	263	1	1	1945	1	110	1	8	4	3866	2658	428	1	3865	13	15	17	1656
T	3865	3	3863	1	36	3865	1	90	25	3865	1	1	3865	3865	17	28	3865	3864	1	334
PA0477		full	CGTACNNNNNNNTTAGT	4	momeric
A	32	16	135	1023	20	181	285	730	533	19	28	1	105	7	1023	1	1
C	1023	15	26	1	1023	8	187	19	461	957	7	2	1	20	45	54	4
G	22	1023	247	1	6	559	542	31	18	1	987	268	30	5	17	1023	1
T	520	11	1023	54	7	274	6	240	8	45	1	751	1023	1023	4	131	1023
PA0479		full	TKWACKAHMYRKTTMGTHHA	4	dimeric
A	1482	2381	2810	4807	501	498	4807	2867	1865	358	2410	304	1804	1377	3662	360	1279	2056	900	4807
C	2532	12	1048	1097	4807	1789	1616	699	3537	3172	639	282	506	3143	1982	31	198	1675	3042	2321
G	2375	3779	1892	248	203	2073	2811	396	318	478	2988	3718	1590	896	328	4807	1230	1062	9	3601
T	4807	1541	2929	1752	452	3572	998	1242	222	2225	637	1636	4807	4807	245	483	4807	2009	1378	1201
PA0491		full	CCTGACNNNNNGGTCA	3	dimeric
A	1	4	2	8	306	10	1	156	243	147	39	5	36	1	1	306
C	306	306	8	1	1	306	165	2	1	1	110	18	2	2	306	1
G	5	1	1	306	1	1	5	249	42	5	8	306	306	8	1	1
T	5	34	306	1	1	7	135	1	21	152	249	1	5	306	1	1
PA0528		full	STTATNNNNNNNATAAS	3	dimeric
A	5319	286	1886	12644	2424	6635	9265	5846	7108	7356	5075	3039	12797	220	12795	12634	1419
C	10877	2799	41	500	382	4953	2668	5195	5781	4748	5316	7883	111	114	658	360	7593
G	7593	360	679	117	111	7812	5313	4710	5774	5144	2712	5025	379	500	41	2860	11277
T	1416	12545	12654	224	12746	3009	5198	7339	7278	5774	9142	6710	2424	13003	1902	286	5186
PA0535		full	NTTCABNNNNVTGAAN	4	dimeric
A	160	104	127	68	753	49	329	254	369	188	472	1	102	748	753	683
C	204	17	20	755	56	570	359	353	333	481	182	35	1	55	1	226
G	226	1	55	1	38	182	481	333	353	359	570	56	750	13	17	204
T	686	757	755	102	1	470	185	369	254	329	49	753	70	127	104	160
PA0547		full	ACGGANNNNNNNNTCCGT	4	dimeric
A	119	1	1	1	119	2	123	87	1	111	34	108	1	10	4	13	7	1
C	25	119	3	1	3	117	4	48	43	16	1	1	116	10	119	119	1	96
G	96	1	119	119	10	116	1	1	16	43	48	4	117	3	1	3	119	25
T	1	7	13	4	10	1	108	34	111	1	87	123	2	119	1	1	1	119
PA0564		full	WNCGTATANNNTATACGNW	4	dimeric
A	139	51	44	19	1	139	1	139	3	1	132	1	139	1	139	6	1	136	85
C	6	3	139	1	1	3	6	1	139	139	1	13	1	1	6	139	27	35	3
G	3	35	27	139	6	1	1	13	1	139	139	1	6	3	1	1	139	3	6
T	85	136	1	6	139	1	139	1	132	1	3	139	1	139	1	19	44	51	139
PA0652	vfr	full	ATTGGATCCAAT	4	dimeric
A	480	237	3	1	1	483	6	1	2	483	483	169
C	16	51	1	4	3	1	1	481	483	9	10	65
G	65	10	9	483	483	1	1	3	4	1	51	16
T	169	480	480	2	1	6	483	1	1	3	237	483
PA0708		full	TCACWTTTTGTNW	4	dimeric
A	19	33	103	9	33	55	44	18	51	1	18	24	78
C	1	103	16	103	1	14	37	29	66	17	2	19	1
G	9	53	13	39	6	18	29	76	40	103	2	49	21
T	103	32	24	27	71	103	103	103	103	6	103	10	26
PA0739		full	ACCACNNNNGTGGT	4	dimeric
A	130	1	3	133	5	59	59	47	69	43	29	1	25	12
C	17	130	133	3	134	46	71	63	58	2	6	1	5	8
G	8	5	1	6	2	58	63	71	46	134	4	134	134	17
T	12	25	1	29	43	69	47	59	59	5	134	3	1	134
PA0739		full	ACCACNNNGTGGT	4	dimeric
A	111	18	33	111	1	54	51	40	26	1	1	21	46
C	1	111	111	3	111	56	60	61	1	1	1	1	14
G	14	1	1	1	1	61	60	56	111	3	111	111	1
T	46	21	1	1	26	40	51	54	1	111	33	18	111
PA0784		full	YTGGWCTAGWCCAR	3	dimeric
A	75	2	1	1	696	226	1	1463	1	1450	4	5	1463	769
C	1410	1	5	1	47	1463	1	2	12	1	1463	1463	2	117
G	117	2	1463	1463	1	12	2	1	1463	47	1	5	1	1410
T	769	1460	5	4	1450	1	1463	1	226	696	1	1	2	75
PA0791		full	TGGCCNNNNNNCGAAA	4	momeric
A	195	38	82	38	94	126	410	385	306	111	281	230	448	966	968	964
C	193	1	1	966	964	238	89	154	174	398	99	962	235	332	88	416
G	104	968	966	1	163	370	264	253	233	173	366	47	964	88	52	436
T	958	1	142	11	227	237	205	179	254	286	221	29	366	359	379	487
PA0828		full	NGTATANNNTATACN	3	dimeric
A	1717	1576	458	9350	1	9449	591	1395	7594	193	9340	17	9436	875	2943
C	8212	98	284	50	302	237	9240	7963	73	224	66	66	533	9436	2582
G	2582	9345	533	66	66	224	73	7792	9180	237	302	50	284	98	8149
T	2943	875	9265	17	9345	193	7637	1393	591	9338	1	9436	458	1576	1717
PA0839		full	ANNNGACCGGTCNNNT	4	dimeric
A	832	414	337	308	35	831	164	11	133	1	23	6	479	527	388	145
C	172	157	312	566	12	16	829	832	7	34	89	835	46	267	495	243
G	242	495	267	46	831	89	34	7	832	833	16	12	568	313	157	171
T	143	387	526	479	6	23	1	133	11	164	832	35	308	339	414	833
PA0864		full	TGDCNGNNNNNCGAYAG	4	momeric
A	60	1	169	4	184	123	392	181	398	234	267	38	231	800	153	800	157
C	76	30	2	800	541	217	86	108	61	222	82	797	11	5	371	1	285
G	59	799	363	10	12	797	182	96	210	146	195	50	800	110	37	58	802
T	799	4	272	30	67	313	144	420	136	204	263	23	35	28	435	16	341
PA0906	alpR	full	NCTATATNNNNNNATATAGN	3	dimeric
A	39	3	45	198	3	198	1	13	1	165	6	10	3	198	1	198	3	198	3	3
C	169	198	1	1	1	3	17	195	1	25	191	195	158	3	7	1	1	3	3	1
G	1	3	3	1	1	7	3	158	195	191	25	1	195	17	3	1	1	1	198	169
T	3	3	198	3	198	1	198	3	10	6	165	1	13	1	198	3	198	45	3	39
PA1128		full	GTTGANNNNNNNTCAAC	4	dimeric
A	213	41	1	47	1725	1747	830	1555	1105	1542	1781	1	4	154	1725	1725	1
C	45	3	1	1	16	1	845	163	619	20	1	1529	1	1725	1	21	1725
G	1725	21	1	1725	1	1529	1	20	619	163	845	1	16	1	1	3	45
T	1	1725	1725	154	4	1	1781	1542	1105	1555	830	1747	1725	47	1	41	213
PA1141		full	ACCACNNNNGTGGT	4	dimeric
A	194	22	18	194	12	77	113	66	102	35	15	11	29	1
C	90	194	194	1	194	78	72	96	77	1	1	1	11	18
G	18	11	1	1	1	77	96	72	78	193	1	191	193	90
T	1	29	11	15	35	102	66	111	77	12	193	18	22	193
PA1141		full	ACCACNNNGTGGT	4	dimeric
A	138	1	20	138	37	70	57	56	16	1	1	30	18
C	44	138	138	9	138	31	81	79	40	1	1	1	9
G	9	1	1	1	40	79	81	31	136	9	136	136	42
T	18	30	1	1	16	56	57	69	37	136	20	1	138
PA1141		full	ACCACNNNNNGTGGT	4	dimeric
A	155	14	33	155	1	83	64	94	63	48	32	4	1	25	6
C	34	155	155	9	155	46	80	61	58	62	11	3	10	4	26
G	26	4	10	3	11	62	58	61	80	46	155	9	155	155	34
T	6	25	1	4	32	48	63	94	64	83	1	155	33	17	155
PA1142		full	GCCCANNNNNNNTGGGC	4	dimeric
A	412	1367	1	274	4395	1456	1855	2148	2657	1970	2121	1433	261	113	1859	60	402
C	246	4401	4354	4397	260	1303	1952	1900	1860	2058	1708	1857	1	3	48	48	4399
G	4379	48	47	3	1	1864	1727	2044	1851	1895	1939	1303	263	4371	4371	4388	249
T	399	60	1864	113	260	1441	2126	1982	2672	2133	1860	1449	4374	272	1	1373	409
PA1142		full	GCCCANNNNNNTGGGC	4	dimeric
A	328	1448	22	327	4351	1632	1921	2273	1876	2097	1503	220	120	1947	91	389
C	284	4354	4333	4344	117	1364	1946	1770	1972	1607	1792	14	18	10	62	4364
G	4350	60	10	16	14	1790	1618	1985	1773	1943	1344	117	4328	4357	4368	289
T	392	84	1935	121	222	1508	2095	1851	2279	1895	1615	4333	331	22	1471	326
PA1142		full	GCCCANNNNNTGGGC	4	dimeric
A	317	1125	63	248	3769	1732	2311	2258	1641	1294	309	54	1432	108	250
C	155	3773	3749	3775	91	1217	1483	1743	1629	1771	37	41	13	7	3790
G	3780	5	13	41	37	1775	1648	1739	1477	1208	88	3790	3774	3777	157
T	256	106	1434	54	311	1280	1627	2266	2311	1749	3792	253	63	1127	314
PA1145		full	NCATCANNNNNNNNNTATGTN	4	dimeric
A	144	1	281	14	94	281	108	72	136	94	102	87	40	45	141	55	281	1	22	62	77
C	36	281	30	19	281	1	52	73	27	46	39	67	60	41	10	107	1	73	41	86	15
G	36	13	26	19	10	24	82	48	57	51	43	49	73	67	52	152	1	25	281	15	77
T	61	42	6	281	79	75	35	84	57	87	92	75	105	124	73	281	1	281	11	281	107
PA1196	ddaR	full	TGTCGNNNNNNCGACA	4	dimeric
A	283	232	1021	1	331	1476	1499	1398	1327	884	496	1509	83	2112	1	2100
C	1706	29	98	2107	2441	310	448	463	429	795	1120	2093	1	121	2068	179
G	178	2113	121	1	2101	1124	789	483	462	445	309	2457	2114	98	29	1703
T	2078	1	2027	82	1490	491	882	1333	1402	1490	1482	318	1	979	232	283
PA1201		full	CGAACNGTTCG	4	dimeric
A	430	195	461	461	197	320	331	58	54	61	256
C	461	83	41	1	461	137	14	1	55	461	124
G	124	461	55	1	14	137	461	1	41	83	461
T	256	61	54	58	331	320	197	461	461	195	430
PA1223		full	ATTGGATCCAAT	4	dimeric
A	1983	669	7	1	1	1983	4	3	1	1983	1983	368
C	42	160	1	3	6	1	3	1983	1983	17	23	297
G	297	23	17	1981	1981	3	1	6	3	1	160	42
T	368	1983	1981	1	3	4	1983	1	1	7	669	1983
PA1226		full	TGCANNNNNTGCA	4	dimeric
A	1	1	835	527	98	169	342	316	353	1	1	14	537
C	28	125	527	69	285	216	297	456	139	143	1	530	133
G	134	535	1	149	139	452	300	234	283	71	533	125	25
T	538	11	1	1	354	316	342	167	102	530	832	1	1
PA1235		full	TGTCCRTTTY	3	momeric
A	787	165	1575	1	597	2790	2152	1035	1331	736
C	401	80	185	4306	4208	369	793	586	1369	2515
G	188	4181	678	129	655	1669	986	137	532	440
T	4268	67	4145	50	771	900	4369	4382	4438	1925
PA1241		full	GCTGCGNNNNNNYTTGC	4	momeric
A	14	1	1	116	1	281	86	104	84	124	99	152	8	22	15	18	1
C	8	396	7	1	396	15	123	48	28	60	171	83	387	1	19	6	396
G	396	7	6	396	1	396	71	91	125	87	34	103	9	1	15	396	1
T	4	14	396	75	55	14	115	150	157	124	91	57	9	396	396	1	1
PA1241	MetR	full	GCTGCGNNNNNYTTGC	4	momeric
A	15	1	1	117	1	242	73	98	112	69	113	15	1	1	1	3
C	8	362	16	1	362	18	97	20	7	111	113	339	2	9	1	362
G	363	2	1	362	1	362	72	92	117	45	89	4	8	16	362	13
T	9	1	362	32	16	20	118	150	123	135	46	23	361	361	1	13
PA1264		full	TRDTGCANNNNNNNTGCAHYA	4	dimeric
A	12	1121	1257	14	168	16	1478	622	797	1090	1209	682	696	695	55	88	906	1485	377	702	1487
C	1	653	174	4	8	1478	177	833	655	460	275	295	207	586	68	1	1487	1	651	1447	1
G	1	1438	651	1	1478	1	68	586	207	295	275	460	703	833	177	1487	8	4	174	653	1
T	1478	702	368	1478	906	88	55	695	696	682	1209	1090	797	622	1487	16	168	14	1257	1121	12
PA1269		full	GTATANNNTATAC	4	dimeric
A	8282	6057	16693	2317	16359	5622	6270	7873	5730	16286	2353	16228	7737
C	2307	7609	2259	4923	8831	15149	11651	1308	5107	4048	2786	8184	16326
G	16405	8281	2713	3994	5089	1300	11735	14683	8690	4956	2282	7446	2284
T	7628	16206	2364	16582	5724	7686	6193	5707	16522	2380	15945	6069	8123
PA1290		full	RGTATGWWWCATACY	3	dimeric
A	12556	74	3854	15808	166	4170	8750	15953	14972	3041	15831	2198	15621	215	110
C	2194	12	2127	974	7539	8889	110	309	415	16006	13298	333	1829	15662	12372
G	12193	15816	1829	333	13429	15360	415	309	110	8745	7696	969	2130	12	2205
T	110	215	15795	2157	15701	3064	15031	15781	8796	4170	166	15929	3726	74	12644
PA1315		full	YGACYGACNGTCRGTCR	4	dimeric
A	686	1671	26713	6331	166	1326	26710	8445	7910	4392	6389	2062	16495	1308	65	27	24697
C	17508	4	50	26710	24475	11	2386	26586	18803	6631	19599	26586	363	327	1929	26713	1460
G	1460	26710	1929	327	363	26586	19599	6631	18803	26713	2386	11	24475	26713	50	4	17508
T	24693	27	65	1308	16495	2062	6389	4392	7910	8445	26710	1326	166	6331	26586	1671	686
PA1328		full	NTAGTTAGCTAACTAN	4	dimeric
A	781	1	890	1	283	272	890	1	1	42	890	890	4	43	890	112
C	1	4	183	67	21	1	6	1	890	55	4	34	890	1	4	226
G	226	4	1	890	34	4	55	890	1	6	1	21	67	183	4	1
T	112	890	43	4	890	890	42	1	1	890	272	283	1	890	1	781
PA1359		full	NTAGTAGACYRGTCTACTAN	4	dimeric
A	1	1	423	97	1	423	63	423	157	1	424	1	1	1	38	423	14	1	423	423
C	1	36	1	75	17	878	1	1	423	424	1	1	1	423	1	7	423	1	1	1
G	1	1	1	423	7	1	423	1	1	1	424	423	1	1	878	17	75	1	36	1
T	423	423	1	14	423	38	1	1	1	424	1	157	423	63	423	1	97	423	1	1
PA1399		full	TATGAATNNNATTCATA	4	dimeric
A	31	293	1	3	293	293	260	2	292	198	293	37	226	22	293	1	293
C	484	3	1	3	2204	15	355	91	1	292	55	1357	1	293	1	10	53
G	53	10	1	293	1	1357	55	292	1	91	355	15	2204	3	1	3	484
T	293	1	293	22	226	37	293	198	292	2	260	293	293	3	1	293	31
PA1413		full	YGATAANNNNNNNTTATCR	4	dimeric
A	223	460	2359	12	2359	2359	800	591	1534	1713	997	1159	1217	36	65	2359	19	295	2099
C	2099	2062	1	24	10	125	987	1600	319	646	710	1206	1491	849	1	11	14	2359	6
G	6	2359	14	11	1	849	1491	1206	710	646	319	1600	987	125	10	24	1	2062	2099
T	2099	295	19	2359	65	36	1217	1159	997	1713	1534	591	800	2358	2359	12	2359	460	223
PA1430	lasR	full	DGNTAGCTRNNNNNNNNNNYAGCTANCH	4	dimeric
A	3756	320	792	1	3758	1	1	1	3758	794	1	2972	6	3747	2965	2972	8	2972	3758	1	3758	41	1	1	3758	2972	210	3759
C	1	3	2963	393	1	1	3758	7	1	1	3756	3749	2963	8	8	784	784	1	1	2974	1	64	3758	2	1	784	3758	2
G	2	3758	784	1	2	3758	64	1	2974	1	1	784	784	8	8	2963	3749	3756	1	1	7	3758	1	1	393	2963	3	1
T	3759	210	2972	3758	1	1	41	3758	1	3758	2972	8	2972	2965	3747	6	2972	1	794	3758	1	1	1	3758	1	792	320	3756
PA1490		full	WWATAAGNNNNNCTTATWW	4	dimeric
A	7788	6692	7786	1	7786	7786	1514	1	13	1924	7790	7792	3	5	1	7786	1	7792	6687
C	1	5	3	4	1	1	9	5859	1	5861	1	1	7786	1	9	5	4	3383	3
G	3	3383	4	5	9	1	7786	1	1	5861	1	5859	9	1	1	4	3	5	1
T	6687	7792	1	7786	1	5	3	7792	7790	1924	13	1	1514	7786	7786	1	7786	6692	7788
PA1520		full	TTGTATACAAT	4	dimeric
A	13539	115	9	1	6815	22	7008	1	6318	6282	10369
C	6246	1814	1	1052	1	3690	1503	7053	513	3531	653
G	9905	764	6423	204	2794	1	297	1	2109	1471	2830
T	6709	7263	10	7249	1	7017	1	8	1	6968	5678
PA1526		full	TTGTNNNACAA	4	dimeric
A	205	32	87	73	144	130	136	406	1	412	411
C	350	157	1	130	304	273	125	1	406	44	254
G	252	41	424	1	124	271	300	131	1	152	345
T	433	422	1	423	133	136	145	79	83	37	198
PA1570		full	WYATAAGNNNNNCTTATRW	4	dimeric
A	284	160	551	8	551	551	86	62	213	272	352	371	102	12	29	550	1	459	469
C	103	208	3	2	30	8	192	313	215	279	169	103	550	44	1	1	1	44	125
G	125	44	1	1	1	44	551	103	169	279	215	312	192	8	30	2	3	208	103
T	469	461	1	551	29	12	102	371	352	272	213	62	86	550	550	8	550	160	284
PA1599		full	TGTCCCNNNNNNNNTATTT	3	momeric
A	891	24	1774	18	1928	243	3916	2629	2524	1033	2278	2906	2121	2786	1110	8905	1843	2304	2268
C	2935	1	44	8406	8927	8726	1495	1283	2401	2693	1968	2559	708	1393	5618	116	3324	712	3758
G	349	8867	3756	1	426	261	1665	1053	1172	1430	3943	2774	4756	2955	2303	328	1500	186	777
T	8647	208	8835	7	4212	137	1775	3852	2867	3810	794	734	1398	1836	8924	23	8941	8745	8911
PA1603		full	TTTGTDYGCRHACAAA	4	dimeric
A	1057	725	888	492	825	1035	371	798	212	1143	398	1235	94	1235	1235	1235
C	639	168	2410	194	1387	178	847	122	1235	481	654	346	1235	530	321	537
G	537	321	530	1235	346	654	481	1235	122	847	178	1387	194	2400	168	639
T	1235	1235	1235	94	1235	398	1143	212	798	371	1035	825	492	878	725	1057
PA1627		full	ATTGTATCNNNNNNGATACAAT	4	dimeric
A	62	133	1	1	1	62	166	1	35	32	47	17	20	30	1	62	1	62	1	62	62	317
C	37	64	5	1	1	1	27	62	22	5	12	37	42	22	2	1	57	1	62	1	79	57
G	57	79	1	62	1	57	1	2	22	42	37	12	5	22	62	27	1	1	1	5	64	37
T	317	62	62	1	62	1	62	1	30	20	17	47	32	35	1	166	62	1	1	1	133	62
PA1630		full	GCGRAAYNNNRTTYCGC	4	dimeric
A	4747	10	142	23599	24860	24860	2483	15479	10323	15590	9948	958	301	83	1	296	6068
C	27	24860	239	183	1	2105	23445	941	14536	7435	527	1	34	4571	24860	1	24860
G	24860	1	24860	4571	34	1	527	7435	14536	941	23445	2105	1	183	239	24860	27
T	6068	296	1	83	301	958	9948	15590	10323	15479	2483	24860	24860	23599	142	10	4747
PA1704		full	RGTATGNNNCATACY	4	dimeric
A	50670	8	2153	49536	1	14010	33051	45436	48501	8206	54553	6434	54406	2946	13
C	8069	1	3539	6754	20080	14466	2525	9064	97	54311	25206	417	3132	54189	48889
G	48522	54120	3132	417	25206	54533	97	9064	2525	14466	19991	6754	3539	1	8069
T	13	2946	54378	6434	54546	8206	53632	45436	27972	14010	1	54481	2153	8	50891
PA1738		full	ATTGGATCCAAT	4	dimeric
A	7268	4388	6	1	1	6902	1	6	9	7326	7314	2632
C	124	444	9	6	1	1	9	7081	7093	95	220	842
G	842	220	95	7135	7144	9	1	1	6	9	444	124
T	2623	7295	7135	9	6	1	7087	1	1	6	4206	7120
PA1760		full	ATTGGATCCAAT	4	dimeric
A	151642	71290	549	57	132	154667	13	10	18	150542	160627	58258
C	4628	12415	1140	1	4	30	81	148486	151828	2689	3859	22402
G	22115	3809	2730	152130	151067	81	30	4	1	1140	12468	4713
T	58473	151149	154809	18	10	13	154683	132	57	549	70930	153815
PA1826		full	WNRTTAAYATRTTAAYNW	3	dimeric
A	3909	2285	4466	3338	2755	6285	6298	624	6368	2286	4259	572	903	6368	6243	3233	2631	5405
C	4331	3539	4750	2133	160	2807	343	5531	973	2236	3353	1091	14	4868	3514	5341	2831	3105
G	3105	2831	5300	3507	4820	14	1091	3340	2250	973	5600	343	2793	160	2133	4722	3456	4338
T	5530	2631	3213	6416	6347	903	565	4280	2279	6285	624	6451	6326	2755	3331	4424	2313	3909
PA1864		full	YTGACCNNNNGGTCAR	4	dimeric
A	275	165	648	2666	474	46	972	1393	906	704	1800	334	1419	128	2668	2250
C	1911	276	48	194	2665	2666	1480	953	1405	1503	180	57	429	2661	375	108
G	108	375	2660	429	57	181	1504	1409	946	1480	2674	2671	196	48	275	1906
T	2249	2660	128	1418	334	1800	703	904	1393	969	46	474	2668	650	165	275
PA1884		full	HATARYTATD	4	dimeric
A	42394	131739	5096	130733	92201	15881	16617	133226	2794	119971
C	70210	1805	5903	5451	25525	124668	3470	2604	30755	28286
G	28648	31798	2621	3471	122729	26008	5597	6154	1771	72046
T	117529	2794	133475	15502	15195	95331	131120	5128	130295	44090
PA1945		full	YGTATCRHDHDYGATACR	4	dimeric
A	108	9	1	105868	409	644	105843	54164	51704	54155	105854	37	19	105868	87	105866	9	105860
C	51709	6	22	5039	100	105868	9	51668	39	105850	21	105839	3	14843	24	25	105868	11
G	11	105868	25	24	14843	3	105839	21	105850	39	51668	8	105868	100	5039	22	6	51709
T	105860	9	105868	87	105868	19	37	105854	54155	51704	54164	105843	644	409	105836	1	9	108
PA2005	hbcR	full	GTCTCNNNNNNGAGAC	4	dimeric
A	4005	153	281	30	4276	2603	3465	3592	3174	2625	3066	1471	5742	542	5728	1921
C	1442	60	5790	2420	5788	2717	1945	1678	2008	2576	2283	768	284	263	283	5761
G	5700	283	262	281	759	2315	2548	1970	1676	1869	2716	5774	2450	5664	60	1467
T	2028	5852	542	5708	1517	3047	2589	3152	3576	3491	2536	4126	30	281	156	4159
PA2028		full	YTGGTCTAGACCAR	3	dimeric
A	576	1	1	1	3627	1690	1	8538	1	8484	1	1	8285	5857
C	6962	1	1	1	607	8457	9	1	1	9	8430	8357	9	2894
G	2813	9	8376	8348	9	1	1	9	8538	598	1	1	1	7142
T	5839	8366	1	1	8538	1	8466	1	1672	3573	1	1	1	576
PA2100	MdrR2	full	NTTAANATNTTAAN	3	dimeric
A	772	354	157	1332	1332	1	1332	82	635	54	20	1332	1332	352
C	242	12	1	42	41	1087	46	65	549	6	1	22	148	587
G	587	148	22	1	6	549	65	46	1087	41	42	1	12	242
T	352	1332	1332	20	54	635	82	1332	1	1332	1332	157	354	772
PA2118	ada	full	ADTAGACNNGTCTAYT	3	dimeric
A	2159	1076	1	2159	19	2159	1	49	1501	3	9	1	103	2159	623	1
C	5	319	65	168	1	3	2159	2062	1	1	29	2159	57	1	2054	6
G	6	1483	7	34	2159	18	1	1	1928	2159	6	1	179	66	311	1
T	1	620	2159	99	1	9	3	1371	52	1	2159	40	2159	1	1125	2159
PA2121		full	NAGTAGACNNGTCTACTN	3	dimeric
A	4415	11252	14622	336	11255	2584	11255	1169	18	6183	153	102	3	2888	11255	14119	26	5566
C	7560	2496	9543	694	7024	3	5	11255	11144	1	272	997	11255	3339	857	11255	550	4425
G	4425	550	11255	857	3339	11255	997	272	1	11144	11255	5	3	7024	694	9543	2496	7560
T	5566	26	14119	11255	2888	3	102	153	6183	18	1169	11255	2584	11255	336	14622	11255	4415
PA2206		full	ACAGANNNNTCTGT	4	dimeric
A	648	14	649	65	651	397	204	213	27	6	85	247	31	34
C	37	648	158	38	1	574	570	43	27	2	647	104	1	25
G	25	1	104	649	2	27	43	568	570	1	38	159	649	37
T	34	31	247	85	6	27	215	204	390	649	65	645	14	653
PA2220		full	TTTAGNNNNNCTAAA	4	dimeric
A	2813	12823	6621	15282	2268	7831	7112	7703	9133	8482	908	910	15094	14694	14599
C	1687	380	3541	203	3326	5107	6716	7421	3153	6635	14423	62	7205	7516	3474
G	3474	8599	7196	62	15299	6680	3415	7514	6427	5068	3326	203	3544	380	1698
T	14825	14709	15107	910	883	8222	9786	7085	7071	7961	2287	14467	6679	12907	2759
PA2258	ptxR	full	ACCANNNNNNNTGGT	3	dimeric
A	4059	189	264	4249	927	1107	2002	3033	1547	2326	356	160	97	573	431
C	1312	4213	4189	176	2053	2982	1847	1473	2834	1243	1459	19	246	210	397
G	397	217	268	23	1475	1197	2915	1440	1917	2933	2013	161	4240	4264	1341
T	442	564	97	154	334	2348	1493	3050	1964	1116	931	4174	258	182	4444
PA2259	ptxS	full	GTYKCANNNNNTGMAAC	4	dimeric
A	1098	1158	1106	180	547	14523	3936	5226	5712	5507	6670	355	2705	8038	14708	14669	670
C	681	341	8121	12	14455	330	5025	3430	4562	5543	3668	1242	31	8211	201	298	14436
G	14171	243	190	7758	33	536	3258	5856	6023	3881	4646	717	14661	11	8422	178	437
T	1194	14022	6831	7970	2181	123	6199	6307	5641	6021	3434	14548	1085	196	1219	1047	646
PA2259	ptxS	full	GTYKCANNNNTGMAAC	4	dimeric
A	1009	1076	1095	133	592	13663	4026	5310	5851	7853	441	2090	7839	13756	13467	748
C	671	381	7079	15	13822	56	5470	3594	4752	2409	629	1	7087	157	269	13712
G	13669	213	131	7132	1	250	1935	5506	3978	4870	89	13713	42	7673	150	432
T	1280	13962	7382	7883	1685	109	6855	5431	5206	3175	13531	1215	126	1167	1002	677
PA2259	ptxS	full	GTYKCANNNNNNTGMAAC	4	dimeric
A	411	439	410	16	301	6157	2017	1659	2453	2420	2422	2948	250	1224	2973	6209	6255	249
C	274	124	3672	3	6256	430	1672	1661	1623	2141	1870	1552	669	1	3517	48	55	6179
G	6183	46	45	3546	17	303	1376	2047	2286	1954	1966	1531	800	6239	4	3773	60	173
T	412	6189	2635	3000	936	102	2706	2714	2111	2003	1808	1717	6225	643	6	453	391	246
PA2267		full	TTGCANNNGCGCA	4	momeric
A	5273	1	1	21	50951	621	10233	1257	15037	1508	7588	7	50937
C	374	1	1	50949	692	22756	11103	20823	6004	50942	11	37964	5009
G	5219	504	50949	1	6668	7181	7532	8814	50953	1630	44531	1	945
T	50566	50944	99	2480	542	20373	22068	20040	1574	16833	523	1567	502
PA2267		full	TTGCANNNNNGCATA	4	dimeric
A	12839	1	1	2094	71381	1890	30821	23416	53463	56	1657	11	71381	6034	71374
C	2646	9	1	71383	15726	15303	7507	8257	1340	24783	1	71364	8425	1831	1522
G	5851	1	71390	1	17960	862	17952	22391	16080	6317	71399	1	52	928	10622
T	71385	71362	222	135	865	53314	15096	17310	497	40201	7	553	500	71383	5657
PA2316		full	ABTRCGGANNNNNNNNTCCGYAVT	4	dimeric
A	45355	20929	22199	45356	134	1210	9	45352	59	45340	39403	5	45334	5950	45263	5891	3982	1	2900	9	2	45355	39452	790
C	517	5913	76	17174	45352	7629	2845	193	39446	54	12	18	5916	54	44	45297	98	45355	45355	126	5922	3	39418	1309
G	1309	39418	3	5922	126	45352	45352	98	45293	44	54	5916	18	12	54	39446	193	2845	7629	45350	17174	76	5913	517
T	790	39452	45353	2	9	2900	1	3982	5891	45247	5950	45334	5	39405	45344	59	45355	9	1210	134	45352	22199	20929	45355
PA2332		full	TTTAGNNNNNCTAAA	4	dimeric
A	24	100	59	196	12	109	81	105	124	77	17	3	196	196	196
C	1	11	17	15	2	90	68	89	55	65	196	7	43	41	16
G	16	41	41	7	195	65	55	90	69	92	2	15	17	11	1
T	196	196	196	3	17	77	124	104	81	109	12	196	59	100	24
PA2334		full	NGTYATAACNNGTTATRACN	3	dimeric
A	118	630	640	117	447	2	447	447	1	358	114	1	575	253	447	10	411	447	11	372
C	290	258	237	421	178	148	143	65	447	43	342	10	62	655	41	75	32	416	447	41
G	41	447	416	32	75	41	655	62	10	342	43	447	65	143	148	178	421	237	258	290
T	372	11	447	411	10	447	253	575	1	114	358	1	447	447	2	447	117	640	630	118
PA2337	mtlR	full	ATTGGATCCAAT	4	dimeric
A	715	192	2	1	6	700	1	1	1	715	706	71
C	1	19	1	1	1	6	1	696	696	1	10	32
G	32	10	1	711	706	1	6	1	1	1	19	1
T	71	715	715	1	1	1	711	6	1	2	192	698
PA2354		full	DACACNNNNNNGTGTB	4	dimeric
A	164	314	155	312	102	129	118	137	101	175	136	124	1	34	90	95
C	99	1	313	1	314	59	44	116	133	109	76	119	14	43	99	133
G	133	53	1	1	141	101	93	124	116	11	33	319	9	315	84	70
T	75	122	51	1	1	110	167	113	140	119	153	181	319	73	315	167
PA2359	sfa3	full	HAKACWGACNNGTCWGTMTD	4	dimeric
A	8513	8989	1	8989	264	8990	16	8989	198	1375	5193	3	1	1	3795	1	42	4719	802	7615
C	475	6	2	2	8989	44	1	5	8989	7139	476	6	2	8989	2	1	199	5645	47	1
G	1	47	5645	199	1	2	8989	2	6	476	7139	8989	5	1	44	8989	2	2	6	475
T	7615	802	4719	42	1	3795	1	1	3	5193	1375	198	8989	16	8990	264	8989	1	8989	8513
PA2376		full	RGTCANNNNNTGACY	4	dimeric
A	29396	2059	2291	121	38798	14172	27621	29999	22775	23662	9571	270	38857	8026	2465
C	12491	1139	3026	38324	6747	25769	9815	12827	16209	11688	23924	99	761	39255	32050
G	31958	37972	785	96	23909	11655	16144	12865	9879	25886	6639	39444	3000	1178	12588
T	2450	7979	38171	261	9500	23613	22699	29969	27774	13772	38575	118	2214	2019	29423
PA2383		full	CTAACNNNNNGTACG	4	momeric
A	13	1	524	522	1	142	62	218	69	115	1	1	526	1	1
C	520	1	1	6	520	276	50	47	218	29	1	28	1	526	15
G	5	3	1	1	1	19	126	91	17	249	524	1	21	1	526
T	1	522	1	1	1	88	289	169	222	134	1	526	2	2	2
PA2469		full	DHTATASYTATAWD	4	dimeric
A	4053	1015	1092	5376	15	5377	3980	697	866	6158	10	6155	1640	1248
C	153	1068	1317	15	11	85	854	1291	143	121	209	2354	574	528
G	642	435	475	307	76	332	4524	396	361	95	1006	5585	53	419
T	565	3387	5380	1	5377	43	817	4086	6129	85	6160	1037	5407	5168
PA2489		full	RTGACNNNNNNNNNNNNNNNNGTCAY	4	dimeric
A	2913	1	67	7289	1	1	7135	5105	3446	2862	139	127	3423	2190	2881	6416	4947	3423	3038	73	6200	14	2	11	7289	1
C	1	1	1	1	7289	6070	1246	2547	3636	125	5464	4333	3119	4321	3626	1507	4002	3109	2266	6023	495	21	1	7289	96	7190
G	7190	96	7289	1	21	495	6023	2266	3109	4002	1507	3626	4321	3119	4333	5464	125	3636	2547	1246	6070	7289	1	1	1	1
T	1	7289	11	2	14	6200	73	3038	3423	4947	6416	2881	2190	3423	127	139	2862	3446	5105	7135	1	1	7289	67	1	2913
PA2497		full	ACNGAMCGKTCNGT	4	dimeric
A	1280	359	813	246	1276	954	939	810	187	191	323	413	270	179
C	176	1280	434	277	207	1117	1276	187	76	212	1276	450	1	340
G	340	1	450	1274	212	76	187	1276	1117	207	277	434	1281	176
T	179	270	413	323	191	187	810	939	956	1281	246	813	359	1281
PA2510	catR	full	GACYGACBGWCVGTCRGTC	4	dimeric
A	54	189	188	1	1	189	2	1	1	190	1	106	1	1	2	170	117	49	117
C	91	4	189	190	1	1	189	170	1	1	189	2	1	2	189	1	121	119	189
G	189	119	121	1	189	2	1	2	189	1	1	170	189	1	1	190	189	4	91
T	117	49	117	170	2	1	1	106	1	190	1	1	2	189	1	1	188	189	54
PA2519	xylS	full	ACNGAMCGKTCNGT	4	dimeric
A	13136	4286	7982	3052	12686	9289	8883	6915	1551	256	2043	6877	757	1253
C	906	13501	5156	351	763	9099	12879	4979	847	1489	13111	4096	392	2152
G	2154	392	4205	12529	1490	847	4992	12720	8455	768	351	5162	12973	920
T	1253	855	6727	1935	253	1545	6623	9580	9164	12772	3065	7697	4367	12646
PA2534		full	AATAATNNNNNNNATTATT	4	dimeric
A	206	206	15	206	206	23	61	72	86	99	110	75	38	206	5	9	202	18	24
C	31	5	29	13	15	17	74	113	89	106	90	72	89	3	8	5	69	4	28
G	28	4	69	5	8	3	89	76	90	106	86	113	74	17	15	13	29	5	31
T	24	18	206	9	5	206	38	75	110	99	86	72	61	23	206	202	15	206	206
PA2534		full	AATAATNNNNNNNNATTATT	4	dimeric
A	217	217	3	217	217	15	90	92	104	112	81	96	87	59	217	1	6	217	14	52
C	25	1	22	21	1	12	87	89	86	96	88	87	77	63	7	7	2	57	11	9
G	9	11	57	2	7	7	63	77	87	88	96	86	89	87	12	1	21	22	1	25
T	52	14	217	6	1	217	59	87	96	81	112	104	92	90	15	217	217	3	217	217
PA2534		full	AATAATNNNNNNATTATT	4	dimeric
A	197	201	5	201	201	12	61	75	101	83	96	51	201	6	2	201	8	35
C	26	13	32	13	14	10	90	97	76	102	66	50	22	10	12	51	1	28
G	28	1	51	12	10	22	50	66	102	76	97	90	10	14	13	32	13	26
T	35	8	201	2	6	201	51	96	83	101	75	61	12	201	201	5	201	201
PA2681		full	ATTNNTGCANNNNNTGCANNAAT	3	dimeric
A	244	2698	2481	1	242	2193	17	259	244	1	170	1	78	79	618	1183	351	244	1	242	244	244	5601
C	3088	2673	7150	1	246	624	2	244	1850	246	168	246	77	166	2494	177	244	623	2	170	628	63	4614
G	4614	63	628	170	2	623	244	177	2494	166	77	246	168	246	1850	244	2	624	246	1	7150	2673	3088
T	5601	244	244	242	1	244	351	1183	618	79	78	1	170	1	244	259	17	2193	242	1	2481	2698	244
PA2758		full	ACNGAMCGKTCNGT	4	dimeric
A	44469	18721	28426	12557	45118	35628	32938	24392	5468	1877	10805	22723	4464	4480
C	4621	45435	20436	2277	3914	35590	43872	15989	3550	6029	43729	14932	1926	9134
G	8907	1981	14976	44192	6070	3576	16046	44386	35868	3841	2221	19924	43159	4703
T	4399	4576	22787	10379	1803	5344	24299	32592	36235	44222	12419	29031	18937	43672
PA2802		full	ACCANNNNNNNTGGT	3	dimeric
A	8901	626	884	9003	2971	3465	4714	6149	4938	4694	2043	644	740	1097	1396
C	2871	8987	8973	1402	3814	5042	4151	4108	4521	3404	3571	518	666	609	1019
G	984	604	683	517	3523	3413	4625	4110	4145	5015	3797	1430	9049	9085	2921
T	1357	1110	740	621	2085	4764	4898	6044	4751	3495	2917	8990	880	639	9071
PA2838		full	TTGCANNNNNTGCAA	4	dimeric
A	2526	1	18558	207	19875	8546	12772	15211	9145	11646	682	7176	15934	19836	19836
C	729	39	3925	19819	180	8365	6771	4664	4501	6152	30636	1	19873	65	4260
G	4260	65	19850	1	30635	6152	4501	4664	6769	8366	180	19873	3925	39	729
T	19875	19877	15741	7176	682	11649	9147	15212	12782	8838	19860	207	18558	1	2526
PA2846		full	ATCGGNNNNNCCGAT	4	dimeric
A	2010	299	235	12	411	931	997	1089	1711	1769	378	47	117	2010	279
C	80	307	2009	15	216	180	285	919	863	326	2010	2010	175	128	210
G	210	128	175	2010	2010	326	863	919	285	180	216	15	2010	307	80
T	279	2007	117	47	378	1769	1711	1089	997	931	413	12	235	299	2010
PA2877		full	TBRTTAACATGTTAAYVA	3	dimeric
A	911	294	592	490	81	986	986	39	986	389	196	1	39	986	986	254	675	986
C	327	742	480	4	2	87	1	986	2	40	904	40	1	239	90	562	165	1
G	1	165	562	90	239	1	40	904	40	2	986	1	87	2	4	480	742	327
T	986	675	254	986	986	39	1	196	389	986	39	986	986	81	490	592	294	911
PA2879		full	BATCGKNNNNNCCGWTR	4	dimeric
A	13238	52950	21238	9817	1522	14551	21133	21321	21049	29620	26473	22297	2385	10697	40977	12031	35533
C	25840	6457	11206	47835	993	12054	14159	13794	13216	10185	15513	54530	52143	6147	3966	8531	22009
G	17225	5750	4747	7381	54765	43107	17837	9748	16294	17629	12584	11684	501	56153	8519	10014	31046
T	25156	13045	52867	8293	3213	20594	25260	29986	29078	21310	23596	14043	1765	14669	18059	53355	12956
PA2897		full	ACAGTNNNNNNNNACTGT	3	dimeric
A	159	1	159	1	52	59	63	52	65	94	82	87	68	157	7	12	14	83
C	1	159	8	25	25	66	70	75	97	37	47	35	16	27	157	16	23	45
G	45	23	16	159	27	16	35	47	39	97	75	70	66	25	25	8	157	1
T	83	14	12	7	159	68	87	82	94	63	52	63	59	52	1	157	1	157
PA2921		full	TTTAGNNNNNCTAAA	4	dimeric
A	28	311	159	1554	20	724	683	824	1296	860	1	3	1550	1543	1519
C	2	5	34	14	25	655	391	729	321	489	1533	16	54	108	39
G	39	108	54	16	1554	489	321	726	391	655	25	14	34	5	2
T	1552	1551	1554	3	1	863	1296	824	679	724	20	1548	159	311	28
PA3034		full	HWTATARCTATRWH	4	dimeric
A	5619	9420	895	10905	1	10122	4488	288	47	10957	1	7125	4201	5622
C	4384	138	2906	6	1	36	49	10911	1	1	1	1190	1901	2812
G	3304	1263	605	127	1	7	6428	270	14	1	1	3791	145	3661
T	1032	1599	10912	1	10914	1	1	2242	10957	1	10960	2359	6818	2602
PA3067		full	DWYATARYTATRWH	4	dimeric
A	44547	42950	13438	52422	1	52464	42525	3959	3543	56985	1	56764	27511	22180
C	13213	2211	28378	512	1	2211	5420	47132	1	1737	10154	8837	8968	19455
G	20640	6752	11235	10337	1732	1	52568	6141	912	1	505	28719	2292	10476
T	22641	23709	51432	1	53311	2799	4006	43306	58187	48	52918	12929	48672	49931
PA3133	sawR	full	VSAACWBWSHGTTBB	4	dimeric
A	145	129	474	475	1	410	105	339	139	80	60	8	25	49	84
C	73	220	12	1	476	1	275	13	147	102	3	1	69	286	360
G	349	338	58	1	1	99	111	5	390	11	476	1	3	160	88
T	105	51	36	23	38	120	153	316	118	349	1	476	474	112	117
PA3135		full	RSAACASWSTGTTSY	3	dimeric
A	5276	4611	9236	9403	1564	9364	3184	9292	5330	5102	2698	2249	1897	1507	3471
C	3798	6068	932	1659	9338	529	8368	1199	5025	5762	318	264	4214	8293	8343
G	8468	8028	4136	264	318	5762	4984	1202	8432	526	9238	1667	924	6168	3784
T	3554	1502	1874	2247	2681	5040	5313	9359	3119	9307	1597	9287	9258	4658	5371
PA3184		full	NGTAATATTACN	4	dimeric
A	515	112	396	1206	1201	1353	1198	842	953	1190	103	629
C	630	97	93	141	326	1174	800	651	389	1007	1198	326
G	324	1181	1002	390	654	794	1174	327	141	92	97	629
T	627	103	1195	948	841	1191	1354	1198	1189	397	112	515
PA3192	gltR	full	GTTACNNNNNGTTAC	4	dimeric
A	1778	83	80	260287	33972	205677	150540	145077	148250	13516	403	3984	30	255271	863
C	3849	38	126985	29	255323	11582	8873	27583	32315	148530	1	498	127222	2	254549
G	261920	16519	95078	562	1	167421	24304	7947	8628	20861	248314	13734	143086	4202	86
T	1656	259332	253872	1935	9498	10707	225223	215989	219746	197301	1556	247035	254807	1957	1731
PA3225		full	NTGGWMTAKWCCAN	3	dimeric
A	1294	1	1	1	3254	2226	1	12617	1	11865	20	1	12617	5075
C	6815	8	1	1	1336	11896	1	1	15	11	8823	12614	1	3125
G	3125	1	12006	9557	11	15	1	1	12613	1336	1	1	8	9892
T	5075	12003	1	20	12591	1	12617	1	2226	3254	1	1	1	1294
PA3249		full	YTGGTCTAGACCAR	3	dimeric
A	14394	69	14	34	53399	41734	1	71542	61	69352	14	18	69723	45149
C	59482	12	8	1	15616	70974	15	1	782	344	68676	71600	11	38651
G	37739	11	69652	71611	344	782	1	15	68429	15765	1	8	12	59770
T	45707	71139	18	14	70394	61	70666	1	41830	53764	34	14	69	14276
PA3341		full	WTAGTTAGCTANSYAW	4	dimeric
A	659	253	1648	97	737	436	1641	42	6	97	1648	387	213	250	1622	914
C	56	88	833	470	617	44	181	147	1648	957	306	415	787	433	13	308
G	408	18	141	1648	785	405	551	1648	162	127	97	434	862	516	128	69
T	1101	1648	354	58	1648	1641	253	26	123	1648	512	411	225	1197	192	846
PA3381		full	DSTTGTCTAGACAASH	4	dimeric
A	1396	48	373	1	1	1	141	1	1395	7	1395	2	1395	1395	6	529
C	5	1052	1	2	1	1	1395	1	2	1	2	1395	1	1	1136	415
G	415	1136	1	1	1395	2	1	2	1	1395	1	1	2	1	1052	5
T	529	6	1395	1395	2	1395	7	1395	1	141	1	1	1	373	48	1396
PA3398		full	GGAATNNNNNNATTCC	4	dimeric
A	45	24	159	161	10	62	89	67	68	62	61	159	1	9	6	29
C	17	1	12	1	75	80	35	63	65	70	20	21	9	1	159	159
G	159	159	1	9	21	20	70	65	63	35	80	75	1	12	1	17
T	29	6	9	1	158	61	62	68	67	89	62	10	159	159	24	45
PA3458		full	TGGNANNNNTNCCA	4	dimeric
A	158	16	1	260	3517	2323	1411	1181	1450	103	1284	79	83	3537
C	1	47	126	1376	1	1892	1741	2475	1381	1	813	3436	3508	190
G	202	3493	3546	833	1	1403	2458	1723	1867	1	1383	129	46	1
T	3425	81	84	1280	96	1433	1173	1443	2328	3492	263	1	8	164
PA3594		full	GATAANNNNNNNTTATC	4	dimeric
A	5202	5812	156	5849	5846	3104	1847	2469	3596	3826	3203	1576	1030	422	5724	60	2384
C	6485	1	1	666	441	2161	3154	1912	2129	1835	1834	3202	3985	41	280	104	5845
G	5710	104	280	41	3986	3248	1834	1791	2263	1912	3180	2156	428	671	1	1	6507
T	2396	60	5808	422	1030	1588	3208	3822	3596	2472	1840	3173	5853	5792	156	5829	5292
PA3630	gfnR	full	NNTTAANATNTTAANN	4	dimeric
A	224	408	34	42	607	607	7	658	1	285	1	1	607	607	3	189
C	420	71	1	1	20	13	507	1	11	114	1	1	33	31	553	117
G	117	553	31	33	1	1	114	11	1	507	13	20	1	1	71	420
T	189	3	607	607	1	1	285	1	658	7	607	607	42	34	408	224
PA3757	nagR	full	WYRTTAACATGTTAAYDW	4	dimeric
A	14	1	13	8	1	13	13	7	13	1	2	1	1	13	13	1	12	13
C	100	14	15	65	1	13	1	13	2	1	24	17	1	52	1	14	4	2
G	2	4	14	1	15	1	17	44	1	2	13	1	15	1	49	17	14	100
T	13	12	1	13	13	1	1	2	1	13	7	13	13	1	7	13	1	14
PA3771		full	HATNRTTAAYATRTTAAYNMTD	2	trimeric
A	1294	1293	1	1	1294	1	1	1293	1293	1	1293	1	1	1	1	1293	1293	1	1	669	6	626
C	668	1	1	1293	5	1	1	1	1	1294	1	1	1	1	1	1	1	1293	667	625	11	1
G	1	11	625	667	668	1	3	1	1	1	1	1	1294	1	1	1	1	5	669	1	1	668
T	1	9	1293	1	1	1293	1293	1	1	1	1	1293	1	1293	1293	1	1	669	624	1	1293	669
PA3778		full	TTTAGNNNNNCTAAA	4	dimeric
A	116	1370	728	2451	91	1257	1053	1375	1834	1112	95	1	2429	2435	2443
C	23	1	201	8	67	1259	852	1095	608	839	2451	8	238	611	115
G	115	620	238	8	2456	840	608	1084	852	1253	67	8	201	1	23
T	2446	2453	2456	1	95	1112	1867	1375	1053	1257	91	2448	728	1357	116
PA3782		full	GGGCCANNNNNNNTGGCCC	4	dimeric
A	28	14	40	164	22	174	83	88	82	94	74	62	75	68	16	4	47	45	13
C	25	1	21	174	174	33	56	64	75	79	83	76	63	19	3	9	174	174	174
G	174	174	174	9	3	19	63	76	83	79	75	64	56	33	174	174	21	1	25
T	13	45	47	4	16	68	75	62	74	94	82	88	83	174	22	164	40	14	28
PA3782		full	GGGCCANNNNNNNNTGGCCC	4	dimeric
A	15	1	27	133	6	173	82	76	85	65	86	94	73	72	60	6	15	30	56	14
C	14	13	1	173	173	42	88	65	64	85	90	59	78	62	49	17	1	173	173	173
G	173	173	173	1	17	49	62	78	59	90	85	64	65	88	42	173	173	1	13	14
T	14	56	30	15	6	60	72	73	94	86	63	85	76	82	171	6	133	27	1	15
PA3782		full	GGGCCANNNNNNNNNTGGCCC	4	dimeric
A	22	9	5	109	14	204	107	76	105	88	123	101	109	100	83	37	20	9	21	6	9
C	4	4	8	204	204	14	65	90	79	78	80	82	68	94	92	29	17	1	204	204	204
G	204	204	204	1	17	29	92	94	68	82	80	78	79	90	65	14	204	204	8	4	4
T	9	6	21	9	20	37	83	100	109	101	123	88	105	76	107	204	14	109	5	9	22
PA3864	dauR	full	TRGACNNNNNNGTCYA	4	dimeric
A	211	829	15	1309	286	659	664	753	711	540	828	456	121	315	37	1309
C	311	111	58	40	1307	336	511	444	414	647	432	101	11	1311	1080	720
G	716	1077	1313	11	101	432	647	411	445	512	336	1313	40	58	111	314
T	1313	36	315	121	456	825	539	711	752	662	655	290	1315	16	831	210
PA3864	dauR	full	TRGACNNNNNGTCYA	4	dimeric
A	159	1273	43	1682	958	1201	1208	1296	787	922	496	143	300	52	1682
C	220	76	71	13	1668	226	360	395	511	548	127	1	1680	1261	1050
G	1048	1265	1685	1	127	552	511	394	357	226	1679	13	70	76	219
T	1678	54	299	143	492	919	788	1293	1210	1195	964	1676	43	1278	158
PA3895		full	ATCGGNNNNNCCGAT	3	dimeric
A	607	19	54	1	24	375	361	492	292	467	567	1	53	607	507
C	39	51	600	20	67	150	175	104	50	3	600	607	1	34	1
G	1	34	1	607	607	3	50	104	175	150	67	20	607	51	39
T	507	600	53	1	567	467	292	492	361	375	24	1	54	19	607
PA3995		full	TAGGTCAANNNNNTTGACCTA	4	dimeric
A	14922	10220	170	1	354	1199	10220	10220	4740	5469	10219	1	10215	1	2	1	10220	2	3260	6735	10220
C	5	3	365	2	3	10220	12	1	2	4738	1	10220	5474	3	1	1	11	10220	10220	586	2
G	2	586	10220	10220	11	1	1	3	5474	10220	1	4738	2	1	12	10220	3	2	365	3	5
T	10220	6735	3260	2	10220	1	2	1	10215	1	10219	5469	4740	10220	10220	1199	354	1	170	10220	14922
PA4021		full	TCRTTAACATGTTAAYGA	3	dimeric
A	8	149	74	1	30	74	74	16	74	220	728	1	3	74	74	317	234	74
C	1	74	192	1	1	67	2	74	1	1	46	1	1	1	81	2	242	1
G	1	242	2	81	1	1	1	46	1	1	74	2	67	1	1	192	74	1
T	74	234	317	74	74	3	1	728	220	74	16	74	74	30	1	74	149	8
PA4120		full	GTCAANNNNNTTGAC	4	dimeric
A	22	1	18	939	939	792	113	917	284	77	1	13	1	939	7
C	1	18	939	28	1	633	573	21	353	317	7	1	12	1	939
G	939	1	12	1	7	317	353	21	573	633	1	28	939	18	1
T	7	939	1	13	1	77	284	917	113	792	939	939	18	1	22
PA4135		full	WBRTTAACATGTTAAYBW	4	dimeric
A	90	26	96	87	107	146	146	43	146	80	153	36	36	146	146	54	43	119
C	85	73	73	79	16	63	23	146	24	61	138	49	1	134	105	108	69	106
G	85	65	115	117	112	2	62	135	56	28	146	26	61	15	72	81	76	106
T	110	37	49	146	146	41	23	123	71	146	57	146	146	108	111	103	30	81
PA4184	souR	full	NYGRCNNNNNGWCGYN	4	dimeric
A	4469	1309	207	7426	1786	3505	3746	2273	5788	1081	557	3865	1	1565	1269	2940
C	2071	8021	498	1737	8618	918	2431	5135	1398	4219	478	1438	8553	121	5159	5038
G	4524	881	8757	2530	538	6368	1348	3115	3217	1046	8688	1003	1	8562	2038	2024
T	1182	1823	374	3458	889	776	4722	1907	2057	6049	1551	6176	278	668	6089	1707
PA4203	nmoR	full	TCRTTAACATGTTAAYGA	4	dimeric
A	1	24	5	3	1	355	355	65	355	96	159	5	188	355	355	231	65	355
C	295	355	298	262	1	309	1	355	1	92	100	8	1	286	65	352	300	42
G	42	300	352	65	286	1	8	100	92	1	355	1	309	1	262	298	355	295
T	355	65	231	355	355	188	5	159	96	355	65	355	355	1	3	5	24	1
PA4227	pchR	full	ATTGGATCCAAT	2	dimeric
A	363	83	1	2	1	363	1	4	1	363	363	121
C	27	29	1	3	1	2	1	363	363	15	5	14
G	14	5	15	363	363	1	2	1	3	1	29	27
T	121	363	363	1	4	1	363	1	2	1	83	363
PA4288		full	NTTAANNNNTTAAN	4	dimeric
A	1285	310	317	2446	2444	66	2221	307	1272	43	42	2438	2432	344
C	690	657	194	1304	11	2384	5	116	312	1	1	713	302	1864
G	1856	294	713	1	1	312	116	5	2367	9	1302	196	657	690
T	346	2442	2442	42	41	1276	307	2217	66	2442	2424	319	310	1281
PA4315	mvaT	full	DHBTGTATACAATHHB	4	momeric
A	834	853	571	1	1	8	2007	2	2007	1	2007	2007	390	144	31	33
C	334	13	774	24	9	7	4	1	1	2007	80	171	573	665	1791	829
G	807	560	713	201	2007	1	453	2	7	1	8	797	35	110	1	1073
T	361	1143	523	2007	1	2007	2	2007	3	1	1	676	2007	1193	182	90
PA4436		full	ANWWATAAGNNNNNCTTATWWNT	4	dimeric
A	495	135	357	273	495	1	495	495	5	1	368	338	478	349	17	1	1	495	1	498	377	118	236
C	1	374	1	50	1	1	8	1	115	143	8	154	2	233	495	59	1	1	47	1	1	357	8
G	8	357	1	1	47	1	1	59	495	233	2	154	8	143	115	1	8	1	1	50	1	374	1
T	236	118	377	498	1	495	1	1	17	349	478	338	368	1	5	495	495	1	495	273	357	135	495
PA4499	psdR	full	NHTGGATCCAAN	3	dimeric
A	286	60	1	1	17	335	9	32	4	335	335	59
C	3	13	1	1	26	69	6	335	335	11	14	39
G	19	13	45	335	335	1	41	11	57	10	43	15
T	99	265	335	1	76	13	335	2	1	1	98	296
PA4508		full	BYTATCCNNNNGGATARV	3	dimeric
A	63	1	1	496	1	1	6	1	348	87	492	21	9	496	1	496	499	413
C	236	497	4	4	1	496	496	149	412	146	264	4	6	164	6	12	21	264
G	264	21	12	6	164	6	4	264	146	412	149	496	496	1	4	4	497	236
T	413	499	496	1	496	9	21	492	87	348	1	6	1	1	496	1	1	63
PA4581	rtcR	full	NTTATCCNNNNGGATAAN	4	dimeric
A	812	501	250	3706	10	4748	474	2073	2032	1518	1500	1635	1453	3706	1	3706	3706	1373
C	1927	5389	1	42	1	3706	3706	1466	2206	482	337	1642	1	780	1	1029	1952	2993
G	2993	1952	1029	1	780	1	1642	337	482	2206	1466	3706	3706	1	42	1	5389	1927
T	1373	3706	3706	1	3706	1453	1635	1500	1518	2032	2073	474	4767	10	3706	250	501	812
PA4600	nfxB	full	NNTTAANATNTTAANN	4	dimeric
A	273	824	40	29	882	882	4	882	35	567	4	1	882	882	62	213
C	845	28	1	19	1	1	755	1	26	84	16	8	20	50	681	233
G	233	681	50	20	8	16	84	26	1	755	1	1	19	1	28	845
T	213	62	882	882	1	4	567	35	882	4	882	882	29	40	824	273
PA4659		full	YMNTGCGHAYGCTTCK	4	momeric
A	10	524	276	3	1	1	32	146	745	40	2	1	2	1	6	2
C	553	223	119	1	1	747	1	251	1	228	1	747	1	1	747	1
G	1	1	210	1	747	1	747	58	1	56	745	1	2	5	1	245
T	194	6	140	747	1	5	4	349	1	518	8	1	747	747	1	500
PA4769		full	TGGTCNGACCA	4	dimeric
A	164	16	53	57	354	146	76	202	1	189	200
C	67	43	1	89	200	52	34	6	202	200	55
G	55	202	200	6	34	52	199	88	1	44	67
T	200	189	1	202	77	149	350	57	54	16	164
PA4787		full	ATTGGATCCAAT	3	dimeric
A	2228	610	1	1	4	2220	1	13	8	2224	2211	517
C	50	93	8	4	1	4	1	2224	2241	13	4	202
G	198	4	13	2220	2203	1	4	1	4	8	93	50
T	517	2211	2216	8	13	1	2237	4	1	1	610	2232
PA4902		full	WDGGTCAANNNNNTTGACCHW	4	dimeric
A	968	1249	1578	5	665	758	1332	1332	512	1069	930	94	912	10	329	6	1332	12	1543	130	1331
C	324	215	1703	1	1	1332	182	112	801	380	400	1076	305	767	1	10	674	1332	1332	1085	2
G	2	1085	1332	1332	674	10	1	767	305	1076	400	380	801	112	182	1332	1	1	1703	215	324
T	1331	130	1543	12	1332	6	329	10	912	94	930	1069	512	1332	1332	758	665	5	1578	1249	968
PA4906		full	ATTGGATCCAAT	3	dimeric
A	14	86	5	2	5	14	1	8	5	14	14	102
C	57	109	4	1	3	1	1	14	14	78	41	65
G	65	41	78	14	14	1	1	3	1	4	109	57
T	102	14	14	5	8	1	14	5	2	5	86	14
PA4984		full	TGAACNNNNGTTCA	4	dimeric
A	20	28	296	295	1	216	198	148	7	1	1	10	5	289
C	13	9	1	1	295	5	101	87	252	13	1	1	296	12
G	12	296	1	1	13	250	87	101	5	296	1	1	9	13
T	296	5	10	1	1	7	148	198	216	1	296	296	28	20
PA4987		full	RTCATANNNNTATGAY	4	dimeric
A	3860	12	60	5535	20	5535	3860	1210	69	3956	2	5537	1	4	5501	90
C	454	18	5539	46	1	15	1726	405	5467	1066	4	22	4	49	16	1879
G	1878	16	49	4	22	4	1066	5480	405	1726	15	1	46	5542	18	454
T	90	5540	4	1	5544	2	3956	69	1210	3838	5499	20	5494	60	12	3869
PA4989		full	GATAGNNNNNNNNNNNNNCTATC	4	dimeric
A	973	2804	150	2804	577	815	988	1210	1278	1124	1252	1202	1003	1181	1228	1531	1999	708	429	461	2779	392	1254
C	892	372	440	526	804	1033	909	1133	1202	1187	1323	1579	1476	1413	1232	841	838	2014	2784	1820	169	165	2787
G	2784	165	169	1818	2787	2011	831	841	1230	1420	1483	1576	1328	1192	1220	1143	909	1033	804	529	442	372	897
T	1254	392	2804	464	429	708	2004	1548	1228	1181	1003	1202	1247	1127	1280	1212	983	815	582	2774	150	2787	975
PA5059		full	GTATCNNNNNNNNNNNNNNNNNGATAC	4	dimeric
A	2	7	2088	2685	83	1635	1147	1776	1637	450	313	903	1797	1209	1097	227	1163	1825	1787	957	965	821	304	2088	605	2088	73
C	6	986	31	1093	2088	339	182	846	379	1600	979	1021	1027	876	83	1878	846	181	174	400	1679	1181	164	70	3593	19	2088
G	2088	19	3593	70	164	1181	1679	400	174	181	846	1878	83	876	1027	1021	979	1600	379	846	182	339	2088	1093	31	986	6
T	73	2088	605	2088	304	821	965	957	1787	1825	1163	227	1097	1209	1797	903	313	450	1637	1776	1147	1635	83	2685	2088	7	2
PA5189		full	TATTCANNNNNTGAATA	4	dimeric
A	80	288	11	7	6	288	5	40	179	46	158	11	90	288	288	1	288
C	71	2	1	15	288	107	229	193	105	250	150	59	122	2	6	4	19
G	19	4	6	2	122	59	150	250	105	193	229	107	288	15	1	2	71
T	288	1	288	288	90	11	158	46	179	40	5	288	6	7	11	288	80
PA5293		full	TGAATNNNNNNNATTTG	4	momeric
A	1	1	635	632	1	152	147	155	175	135	115	80	626	12	29	9	44
C	34	5	31	68	60	138	222	260	122	228	129	231	61	53	42	77	37
G	1	634	1	11	5	231	87	99	126	85	161	145	98	42	54	42	629
T	632	1	24	40	632	110	177	114	209	185	227	176	123	623	623	629	86
PA5403		full	CGATAANTAATT	4	momeric
A	163	346	499	42	499	499	96	440	499	499	78	133
C	495	61	62	127	180	38	127	93	95	343	22	296
G	104	498	129	204	209	29	149	159	69	430	44	186
T	163	63	284	499	52	39	125	499	438	248	499	499
PA5499	zur	full	GNWAYGTTATAACRTWNC	4	dimeric
A	87	70	113	163	1	40	58	16	163	1	163	163	2	87	2	111	70	54
C	63	74	33	7	154	3	70	1	1	1	14	11	163	30	7	52	55	163
G	163	55	52	7	30	163	11	14	1	1	1	70	3	154	7	33	74	63
T	54	70	111	2	87	2	163	163	1	163	16	58	40	1	163	113	70	87
PA3006	PsrA	full	CGTTTNAAACG	2	dimeric
A	33	1	16	11	10	259	341	341	341	7	37
C	341	4	1	1	1	82	22	18	1	341	27
G	27	341	1	18	22	82	1	1	1	4	341
T	37	7	341	341	341	259	10	11	15	1	33
PA4462	RpoN	full	TTGCCNNNNNNNNNTGCAA	2	momeric
A	141	170	72	179	187	2098	1907	2211	2638	2494	4293	2390	3112	5171	93	22	132	11897	11873
C	176	55	129	11884	11775	3954	4402	2171	3687	2705	2417	3673	4024	2773	54	21	11903	135	392
G	127	95	11845	181	1278	3714	2718	2939	2306	2907	2734	3964	2107	291	30	11892	42	325	951
T	11884	11885	153	387	1378	2156	2876	4596	3291	3798	2476	1869	2644	3681	11862	60	1	386	828
PA4462	RpoN	full	NGGCAYKNNNNTTGCAN	4	momeric
A	81	18	17	9	2283	7	270	1295	834	459	253	137	6	3	15	2285	401
C	202	18	15	2283	77	1729	79	203	63	76	1207	77	125	11	2284	239	726
G	84	2284	2283	13	12	7	2250	424	143	56	85	25	9	2283	1	538	374
T	1919	18	54	62	44	556	33	364	1246	1698	744	2283	2283	1	36	58	786
PA1431	RsaL	full	TATBHNNNNNDVATA	4	dimeric
A	49258	130902	32454	8040	54321	92583	81495	92360	68740	52133	53137	70821	131840	1	132533
C	64057	1	72071	53315	122711	47190	58882	63932	63091	76841	7293	111712	39937	1	30634
G	31112	1	41312	113702	7632	76436	65562	62690	60522	47494	122586	55124	74119	1	63712
T	128799	1	132262	70185	53264	50135	68947	90284	82802	92441	54758	8287	32062	130413	49061
PA5324	sphR	full	GGACNNNNGTCC	4	dimeric
A	442	648	6409	291	3396	2480	2037	1957	281	4215	986	3367
C	707	1653	1249	6443	4619	2230	4366	635	559	6279	6364	6237
G	6436	6362	6593	558	638	4369	2192	4723	6372	1262	1660	696
T	3412	985	4220	283	1986	2103	2503	3431	290	6430	628	440
PA0463	creB	full	CATGNNNNNNNCATG	4	dimeric
A	1270	3614	582	3248	2418	2756	2208	2636	1740	1936	1959	1231	3627	875	3664
C	3607	86	3160	1541	537	567	1413	1380	1538	1302	1802	3670	119	1932	1327
G	1257	1867	109	3591	1849	1317	1561	1370	1417	585	532	1571	3111	98	3603
T	3608	908	3667	1199	1956	2027	1749	2562	2216	2736	2442	3227	562	3543	1302
PA0929		full	TTTACNNNNTTTAC	4	dimeric
A	447	77	63	953	51	528	423	345	268	195	221	17	957	11
C	577	71	101	32	961	53	128	146	374	533	44	77	46	939
G	317	107	351	134	47	302	171	60	181	319	156	169	74	1
T	939	964	953	1	7	93	244	426	144	918	928	933	58	44
PA1099	fleR	full	CGYNTTGCCG	4	momeric
A	381	1431	151	687	496	7	251	1	328	954
C	1819	580	891	352	707	297	1	1818	1810	597
G	723	1821	223	489	590	170	1838	39	150	1823
T	686	499	1081	451	1849	1910	4	275	168	707
PA1397		full	GYRCTAGYRC	4	dimeric
A	11559	9179	15722	1756	227	17111	7888	2283	16451	4582
C	3229	8788	3499	16953	127	577	3759	10655	6438	16807
G	16703	6626	10821	3860	571	166	16597	3436	8748	3393
T	4698	16398	2369	8208	16707	205	1744	15387	9410	11833
PA1437		full	TGWMWGNNNNNTGWHAN	4	dimeric
A	185	73	152	76	340	102	49	115	169	123	80	256	80	82	78	365	24
C	209	85	1	286	83	362	170	74	71	71	180	363	6	31	236	58	93
G	151	358	1	1	98	362	139	37	77	102	48	284	357	4	1	1	145
T	358	157	249	10	21	326	58	190	97	101	69	355	7	315	70	1	143
PA1637	kdpE	full	HTTTACDNNNNBTTTACR	4	dimeric
A	31	20	1	1	107	4	22	40	34	47	28	2	6	7	21	107	2	34
C	54	17	6	4	7	107	1	19	13	12	17	78	17	3	3	14	107	1
G	14	35	7	16	11	1	64	20	26	8	6	9	27	4	8	20	10	73
T	24	107	107	107	9	14	21	24	31	36	51	21	107	107	107	1	1	8
PA1799	parR	full	TTTACANNNNTTTACA	4	dimeric
A	227	171	215	524	1	525	175	167	151	121	169	24	379	525	10	525
C	131	35	194	3	524	18	118	62	129	125	189	30	318	11	525	65
G	220	121	44	21	3	93	87	69	46	118	220	5	62	19	1	97
T	521	522	524	12	2	38	141	222	194	156	525	525	525	24	1	43
PA1980	eraR	full	TTCCCGGGAA	4	dimeric
A	1094	382	23	47	3	289	64	76	1695	1699
C	518	102	1708	1710	1696	56	50	9	458	646
G	642	451	9	50	56	1685	1682	1680	102	513
T	1689	1707	78	62	289	3	47	23	389	1094
PA2479		full	TTAATNNNNNNNATTAA	4	dimeric
A	1028	346	1759	1776	720	601	795	857	818	841	784	568	1768	323	134	1778	1797
C	373	133	346	281	1777	827	771	728	984	757	642	749	1096	231	50	168	997
G	986	166	50	231	1098	746	644	757	969	732	771	829	1789	283	346	135	375
T	1783	1764	134	318	1780	568	790	843	818	850	800	600	716	1759	1776	346	1028
PA2657	bqsR	full	STTAABNNNNNSTTAAN	4	dimeric
A	104	21	14	171	169	10	70	58	59	75	31	98	74	27	171	174	4
C	148	51	1	1	37	68	23	54	36	12	48	102	41	1	89	38	50
G	49	5	69	1	63	59	25	28	84	91	65	72	7	6	35	30	90
T	43	171	171	1	58	41	89	84	61	53	64	11	171	171	84	1	45
PA2809	copR	full	GTAAGNNNNNNGTAAG	4	dimeric
A	998	6205	25951	26677	4163	2624	8101	8836	10290	5907	4672	678	9055	25764	26074	3535
C	1480	2928	20962	1718	13681	12220	6007	4675	4015	9731	8038	534	9025	20938	717	4381
G	26740	541	367	2409	26029	9877	3725	5217	5773	6196	4928	26908	557	110	148	26676
T	2550	26700	1849	1605	15985	3952	11605	10927	8672	7804	11323	683	26784	336	67	11169
PA3077	cprR	full	TTAANNTTAA	4	dimeric
A	1312	1476	2038	2008	406	1184	1072	1145	2056	2040
C	866	561	980	831	1279	966	632	445	823	1535
G	1491	809	424	623	962	1296	827	996	619	900
T	1960	2015	1174	1101	1147	412	2026	2010	1454	1328
PA3204	cpxR	full	TTTACNNNNNNTTTAC	4	dimeric
A	85	82	44	580	11	217	114	222	143	168	150	61	84	1	576	25
C	361	25	2	8	577	90	107	62	120	197	259	292	1	6	23	577
G	64	45	352	37	1	132	133	77	125	60	99	105	37	370	60	1
T	576	579	580	25	13	141	231	225	197	156	72	570	572	579	18	23
PA3879	narL	full	KRGGTAYNNNNNNRTACCYM	4	dimeric
A	9	404	94	81	10	477	59	246	163	180	186	225	145	329	8	477	55	47	144	384
C	1	64	22	29	35	1	376	184	247	260	211	198	270	123	11	52	477	476	258	299
G	299	258	477	476	52	11	123	270	198	211	260	247	184	376	1	35	29	22	64	1
T	384	143	47	55	476	8	329	145	225	186	180	163	246	59	477	10	81	94	404	9
PA4032		full	NVTTCAGAWTBN	4	momeric
A	1849	1224	303	319	342	4648	78	4682	1917	950	261	1121
C	921	1381	200	422	4664	1	751	77	317	217	1704	1158
G	1211	2447	368	257	338	69	4608	161	190	76	979	1182
T	1125	318	4628	4675	341	520	596	352	3051	4627	2362	1633
PA4547	pilR	full	GTGACNNNNNNNGTCAC	4	dimeric
A	400	35	81	342	25	201	172	238	192	173	147	37	1	195	13	341	181
C	479	126	59	317	342	86	143	39	149	112	120	228	1	78	341	16	341
G	342	16	342	78	1	228	120	112	149	39	143	86	341	317	59	130	477
T	181	342	13	192	1	37	147	173	192	236	172	200	25	339	81	35	400
PA4726	cbrB	full	TGTTACNNNNNGTAACA	3	dimeric
A	784	146	916	1820	3273	15	862	1836	2452	1760	1389	1	675	3268	3268	1	3260
C	3665	15	1289	944	327	3263	1765	904	858	1355	1730	1	84	99	327	3252	963
G	968	3268	324	99	84	1	1740	1368	858	910	1767	3250	327	944	1299	15	3693
T	3240	1	3268	3286	672	1	1381	1784	2440	1821	864	15	3283	1831	919	146	782
PA4776	pmrA	full	GNWAYGTTATAACRTWNC	4	dimeric
A	11210	12043	26254	32990	100	1304	9899	508	32737	2	32836	32518	17	22164	296	22903	19141	3883
C	7096	16910	2251	386	25562	2	2170	20	2	6	195	378	32806	1414	6	8086	8939	32338
G	32789	8852	8025	6	1414	32882	378	195	6	2	20	2207	2	25421	386	2276	16914	7106
T	3826	19197	23122	296	21965	17	32829	32396	2	32835	508	9965	1304	100	32536	26051	12237	11096
PA4983		full	GTTTGTAAAC	4	dimeric
A	591	423	107	562	174	14	1594	1594	1599	292
C	132	285	10	335	1	144	225	15	129	1596
G	1596	297	52	331	1584	1	124	23	176	357
T	163	1597	1603	1599	38	1583	283	91	215	682
PA5125	ntrC	full	YAGNAYWWWRTNCTR	4	dimeric
A	550	2465	974	1026	2470	96	2347	2458	1262	2179	247	719	85	15	1195
C	2315	646	189	1646	61	1417	111	103	905	1292	871	824	2451	930	455
G	455	944	2475	825	871	1289	905	103	113	1423	61	1622	189	653	2305
T	1197	15	85	724	245	2196	1268	2458	2340	96	2468	1031	974	2468	550
PA5200	amgR	full	GTAACNNNNNGTAAC	4	dimeric
A	319	972	3588	3535	578	1600	968	1064	1293	463	233	555	3623	3585	351
C	120	848	923	226	3539	290	803	804	922	1491	141	403	857	294	3564
G	3635	161	1068	499	481	1402	704	764	773	604	3517	159	1302	182	682
T	88	3596	1236	911	1054	617	1434	1332	923	1346	62	3487	1475	1303	731
PA5261	algR	full	VGTCANNNNNTGACY	4	dimeric
A	375	158	116	104	861	223	449	452	318	404	322	1	862	289	110
C	291	67	186	859	251	431	211	241	355	222	715	129	18	861	569
G	423	855	32	82	729	246	353	235	175	413	201	858	214	105	336
T	77	245	855	1	293	387	301	503	461	247	856	126	200	167	519
PA5360	phoB	full	TGTMAYNNNNNTGTMAY	4	dimeric
A	2716	964	3458	5872	11787	1288	5931	5244	5355	6063	2275	2094	634	3419	5880	11893	1437
C	5799	179	2046	7097	318	6726	2675	2134	1910	1846	4434	6520	53	2583	7090	181	6570
G	3779	11844	176	223	1577	658	3443	1940	2204	1761	2689	3741	12052	147	211	1469	653
T	11709	1744	11790	525	828	6170	1652	4159	4043	4017	4343	11904	1050	11937	456	839	6429
PA5483	algB	full	ATCGTGCANNNTGCACGAT	3	dimeric
A	151	45	5	26	1	1	1	151	133	138	129	1	1	1	151	9	1	151	131
C	50	305	151	1	1	1	151	1	1	12	26	32	1	151	41	151	1	9	511
G	511	9	1	151	41	151	1	32	26	12	1	1	151	1	1	1	151	305	50
T	131	151	1	9	151	1	1	1	129	138	133	151	1	1	1	26	5	45	151
PA5511	mifR	full	GNWAYGTTATAACRTWNC	2	dimeric
A	468	278	477	594	18	135	340	105	594	1	594	594	10	353	44	405	281	308
C	368	241	154	35	502	8	228	17	1	1	64	102	594	129	1	296	253	594
G	594	253	296	1	129	594	102	64	1	1	17	228	8	502	35	154	241	368
T	308	281	405	44	353	10	594	594	1	594	105	340	135	18	594	477	278	468
PA3385	AmrZ	full	RTRRTGGCNNNNNGCCAYYAY	4	dimeric	biological replicate
A	56156	5481	50042	67968	1	1796	230	51	64565	22855	69279	6256	137	48	38696	39	70307	63	482	68915	16929
C	14554	1	1	7849	11	108	3458	57719	6160	64517	1	481	6559	72	27950	62827	26	18286	68044	1	6642
G	17883	1	67493	4365	26	68728	68718	72	6547	480	1	60051	17366	66454	3460	109	11	1	1	1	14213
T	16915	39339	500	102	52984	39	38655	48	137	6231	67587	15976	64339	51	229	1797	1	65584	52125	5483	67521
PA1431	RsaL	full	TATBHNNNNNDVATA	4	dimeric	biological replicate
A	7145	113720	7331	10323	21439	107201	72351	70644	52149	34652	37054	62631	117282	1	103724
C	54825	1	110017	38183	118800	16898	44816	60261	62790	60474	1	113988	8298	1	1
G	1	1	5288	113301	1	58324	56189	60087	43422	14931	109711	36777	106911	1	77347
T	99922	1	105176	68376	34084	40725	55219	67295	80040	94425	21907	10080	8954	118368	7970
PA1754	CysB	full	NTTATANNNNTATAAN	2	dimeric	biological replicate
A	32	209	124	370	30	370	145	62	29	280	55	370	18	370	370	196
C	40	67	73	184	46	26	13	273	81	213	42	25	16	54	113	351
G	351	113	54	16	25	42	213	81	273	13	26	46	184	73	67	40
T	196	370	370	18	370	55	280	29	62	145	370	30	370	124	209	32
PA0225		full	GACACNNNGTGTC	4	dimeric	biological replicate
A	2406	3829	2453	3821	1475	1943	2093	1528	1547	977	1529	493	2455
C	1316	1275	3832	1500	3813	1858	1950	1789	1074	809	356	332	3850
G	3754	336	355	814	1079	1792	1930	1864	3850	1496	3865	1286	1317
T	2450	491	1521	976	1528	1537	2075	1958	1485	3851	2486	3837	2423
PA0225		full	GACACNNNNGTGTC	4	dimeric	biological replicate
A	268	644	223	642	370	326	263	279	272	166	142	119	620	230
C	242	165	642	155	643	277	305	253	295	145	315	199	635	644
G	644	635	199	315	145	295	253	305	277	644	155	645	164	242
T	231	618	120	142	166	272	279	263	328	371	643	223	645	268
PA0791		full	TGGCCNNNNNNCGAAA	4	momeric	biological replicate
A	8939	2738	1956	2113	3427	20160	22005	20455	16707	8219	15828	32271	18373	24177	36237	18674
C	15488	4670	5685	51082	51097	15226	10834	14067	16106	27320	9545	51171	10891	17706	20668	16029
G	9807	51024	51127	5847	5277	21198	18366	19985	16824	14795	26036	30622	25904	12634	24267	18449
T	31085	3053	5832	594	4767	9316	14595	11199	16132	14482	13863	14850	9871	11353	23932	12682
PA1235		full	TGTCCRTTTY	3	momeric	biological replicate
A	11128	1	31903	1	4758	86808	38543	84077	31453	17761
C	5707	1	1185	112933	114574	6390	13879	21817	23151	66136
G	1218	114786	4665	1	6297	49314	16577	8692	10585	17488
T	113797	3613	113303	1	5760	9846	95768	115848	78992	45833
PA1241		full	GCTGCGNNNNNNYTTGC	4	momeric	biological replicate
A	13	7	29	46	1	29	29	40	60	39	46	6	15	20	16	6
C	18	196	33	11	196	12	67	26	28	70	60	196	10	89	2	196
G	196	1	24	125	1	196	41	53	67	47	66	13	31	14	196	13
T	13	3	196	24	5	4	59	77	43	41	24	2	196	196	2	2
PA1315		full	YGACYGACNGTCRGTCR	4	dimeric	biological replicate
A	1577	1273	20658	5930	96	1629	19597	9088	5929	6551	7140	1622	15573	762	352	62	17095
C	14742	36	102	20613	16519	41	3421	20728	20799	10970	10915	20584	689	1025	1394	20726	2558
G	2571	20821	1414	1018	687	20841	10935	10753	20700	20782	3413	41	16431	20846	102	36	14867
T	16645	62	350	770	15639	1604	7168	6562	5865	9132	19488	1628	96	6012	20609	1271	1592
PA2267		full	TTGCANNNGCGCA	4	momeric	biological replicate
A	202592	697	1	1	74328	9513	12661	15534	28723	1098	4787	1	67168
C	18470	1	270	70968	23695	27773	13062	46272	5562	34084	1	70019	16919
G	98111	2325	71964	1	106069	8929	30420	26047	39205	20064	65694	456	2047
T	75741	68165	1	16557	10761	36959	37887	6077	16338	32774	1	264	1
PA2267		full	TTGCANNNNNGCATA	4	dimeric	biological replicate
A	120337	107	1	1	133802	59239	54878	94411	85775	19319	17557	4121	275036	29521	218942
C	16368	3538	1	201405	26250	113502	111629	129309	44682	159453	1	234435	136888	65961	3312
G	63470	14420	256788	416	156811	64839	98622	70867	160805	39809	247863	283	1	1	30398
T	108933	241425	55	26492	28375	97056	73023	67953	39176	152924	1	1	18402	238429	74706
PA3249		full	YTGGTCTAGACCAR	3	dimeric	biological replicate
A	26626	653	381	603	168354	54298	279	409526	204	419525	63	33	419616	212310
C	379705	736	128	293	45929	421816	145	21	537	694	422197	410425	251	144462
G	146318	251	425654	419984	694	536	21	145	414622	46259	295	129	749	378717
T	216852	424376	33	63	414727	204	409371	278	53238	173981	603	381	652	26561
PA4101	BfmR	full	TGTACNGTACA	4	dimeric	biological replicate
A	3044	4257	945	11162	1583	11381	1562	695	11250	2463	8060
C	6884	5943	384	734	11544	4783	1340	322	736	10964	1924
G	1958	11277	727	320	1339	4697	11434	732	405	5964	6855
T	8032	2469	11176	691	1573	11510	1587	11489	965	4297	3142
PA5360	PhoB	full	TGTMAYNNNNNTGTMAY	4	dimeric	biological replicate
A	30538	15153	67894	148335	286104	27824	162048	148114	159637	166088	55053	23931	10213	79350	150019	282957	25442
C	102913	1860	65070	208873	5429	210092	91010	74523	61382	68304	162929	118352	1987	68558	210835	5022	193392
G	72206	283133	4424	3457	48186	17264	109942	79301	83176	64871	81935	69477	284811	5880	4030	43506	16334
T	189831	42550	285595	6157	18987	142927	37470	102069	112952	109166	114840	184145	42577	283910	5647	14907	142889
PA5360	PhoB	full	TGTMAYNNNNNTGTMAY	4	dimeric	technical replicate
A	29708	15524	74929	130356	258555	26370	131430	113717	127267	141616	45918	25354	12585	74352	142468	247818	25325
C	98528	1749	66797	191573	4676	180734	85953	67777	59828	58956	150234	98363	1243	66575	179995	6649	170842
G	70765	254107	4255	3604	47921	19373	101896	78122	74629	60320	62691	71022	249654	4692	3094	44278	15414
T	155124	43287	256106	6339	20066	136495	35634	97088	94587	90595	89283	156398	46778	251872	6520	14896	120451
