# Supplementary material for: An atlas of the binding specificities of transcription factors in Pseudomonas aeruginosa directs prediction of novel regulators in virulence
Source: eLife. 2021 Mar 29;10:e61885. doi: 10.7554/eLife.61885 (PMC8041468; doi:10.7554/eLife.61885)
Supplement: Supplementary file 4. — TFBSs in the P. aeruginosa PAO1 reference genome using the FIMO software, related to Figures 3–5, Figure 1—figure supplement 1, and Figure 2—figure supplements 1–12. [file elife-61885-supp4.xlsx]

## Sheet: Supplementary File 4
Supplementary File 4: Direct interactions between 199 PWMs and DNA sequences by FIMO software to scan genome wide TF binding sites (TFBSs) in the P. aeruginosa PAO1 genome, related to Figures. 3-5, Figure 1-figure supplement 1, and Figure 2-figure supplement 1-12
TargetChrom	targetStart	targetEnd	PWM_ID	tarScore	targetStrand	tar_p_value	tar_q_value	target_Sequence	annoChrom	annoStart	annoEnd	annoInfo	annoSore	annoStrand	tar_anno_distance
chromosome	597683	597696	PA0032_pwm	21.8902	+	5.76e-08	0.321	CTGGTCTATACCAA	chromosome	597708	598538	PA0539|CDS|-	0	+	-13
chromosome	597683	597696	PA0032_pwm	21.8902	-	5.76e-08	0.321	TTGGTATAGACCAG	chromosome	596970	597479	PA0538|CDS|dsbB	0	-	-205
chromosome	544361	544374	PA0032_pwm	15.622	+	2.08e-07	0.427	CTGCTCTAGACCAG	chromosome	544654	545097	PA0483|CDS|-	0	+	-281
chromosome	544361	544374	PA0032_pwm	15.622	-	2.08e-07	0.427	CTGGTCTAGAGCAG	chromosome	542170	544347	PA0482|CDS|glcB	0	-	-15
chromosome	125875	125888	PA0032_pwm	14.8902	-	2.96e-07	0.427	CCGGTATAGACCAG	chromosome	115046	115298	PA0093_promoter|T6SS	0	-	-10578
chromosome	125875	125888	PA0032_pwm	14.8902	+	2.96e-07	0.427	CTGGTCTATACCGG	chromosome	124810	126381	PA0103|CDS|-	0	+	0
chromosome	3722944	3722957	PA0032_pwm	14.4756	-	3.44e-07	0.427	CTGGCCTAGACCAA	chromosome	3720681	3722759	PA3319|CDS|plcN	0	-	-186
chromosome	3722944	3722957	PA0032_pwm	14.4756	+	3.44e-07	0.427	TTGGTCTAGGCCAG	chromosome	3723534	3724448	PA3321|CDS|-	0	+	-578
chromosome	1639742	1639755	PA0032_pwm	13.7195	+	4.52e-07	0.427	CTGGTCAAGACCAC	chromosome	1649928	1650308	PA1518|CDS|-	0	+	-10174
chromosome	1639742	1639755	PA0032_pwm	13.7195	-	4.52e-07	0.427	GTGGTCTTGACCAG	chromosome	1638652	1639794	PA1509|CDS|tplEi	0	-	0
chromosome	3636272	3636285	PA0032_pwm	13.622	-	5.29e-07	0.427	CTGGACTAGACCAA	chromosome	3635541	3636257	PA3249|CDS|-	0	-	-16
chromosome	3636272	3636285	PA0032_pwm	13.622	+	5.29e-07	0.427	TTGGTCTAGTCCAG	chromosome	3636621	3637679	PA3250|CDS|-	0	+	-337
chromosome	3791031	3791044	PA0032_pwm	12.6341	+	7.93e-07	0.427	CTGGTGTAGACCAA	chromosome	3790987	3791346	PA3385_promoter|biofilm	0	+	0
chromosome	3791031	3791044	PA0032_pwm	12.6341	+	7.93e-07	0.427	CTGGTGTAGACCAA	chromosome	3790987	3791346	PA3385_promoter|T3SS	0	+	0
chromosome	3791031	3791044	PA0032_pwm	12.6341	+	7.93e-07	0.427	CTGGTGTAGACCAA	chromosome	3790987	3791346	PA3385_promoter|T6SS	0	+	0
chromosome	3791031	3791044	PA0032_pwm	12.6341	-	7.93e-07	0.427	TTGGTCTACACCAG	chromosome	3790150	3790986	PA3384|CDS|phnC	0	-	-46
chromosome	3636527	3636540	PA0032_pwm	12.4512	+	9.37e-07	0.427	CTGATCTAGACCAC	chromosome	3636621	3637679	PA3250|CDS|-	0	+	-82
chromosome	3636527	3636540	PA0032_pwm	12.4512	-	9.37e-07	0.427	GTGGTCTAGATCAG	chromosome	3635541	3636257	PA3249|CDS|-	0	-	-271
chromosome	1236401	1236414	PA0032_pwm	12.3659	+	9.63e-07	0.427	ATGGTCTAGACCAA	chromosome	1236644	1237546	PA1145|CDS|-	0	+	-231
chromosome	1236401	1236414	PA0032_pwm	12.3659	-	9.63e-07	0.427	TTGGTCTAGACCAT	chromosome	1234816	1236150	PA1144|CDS|-	0	-	-252
chromosome	2016214	2016227	PA0032_pwm	12	-	1.1e-06	0.427	CTGGGCTATACCAC	chromosome	2015139	2016581	PA1856|CDS|-	0	-	0
chromosome	2016214	2016227	PA0032_pwm	12	+	1.1e-06	0.427	GTGGTATAGCCCAG	chromosome	2019776	2020603	PA1860|CDS|-	0	+	-3550
chromosome	488982	488995	PA0032_pwm	11.7195	-	1.25e-06	0.427	CTGGTCAATACCAC	chromosome	482706	484115	PA0432|CDS|sahH	0	-	-4868
chromosome	488982	488995	PA0032_pwm	11.7195	+	1.25e-06	0.427	GTGGTATTGACCAG	chromosome	488730	489350	PA0436|CDS|-	0	+	0
chromosome	1236522	1236535	PA0032_pwm	11.622	-	1.35e-06	0.427	CTGGTCTATTCCAA	chromosome	1234816	1236150	PA1144|CDS|-	0	-	-373
chromosome	1236522	1236535	PA0032_pwm	11.622	+	1.35e-06	0.427	TTGGAATAGACCAG	chromosome	1236644	1237546	PA1145|CDS|-	0	+	-110
chromosome	3588832	3588845	PA0032_pwm	10.9146	-	1.59e-06	0.427	CTGGTCTATACCCA	chromosome	3588741	3589271	PA3196|CDS|-	0	-	0
chromosome	3588832	3588845	PA0032_pwm	10.9146	+	1.59e-06	0.427	TGGGTATAGACCAG	chromosome	3593144	3593731	PA3201|CDS|-	0	+	-4300
chromosome	2893356	2893369	PA0032_pwm	10	-	2.34e-06	0.427	CTGGTATATACCGC	chromosome	2893286	2893828	PA2559|CDS|-	0	-	0
chromosome	2893356	2893369	PA0032_pwm	10	+	2.34e-06	0.427	GCGGTATATACCAG	chromosome	2894147	2894377	PA2559.1|CDS|srfA	0	+	-779
chromosome	4551588	4551601	PA0032_pwm	7.47561	+	4.02e-06	0.427	CTGGCCGAGACCAG	chromosome	4552859	4553527	PA4074|CDS|-	0	+	-1259
chromosome	4551588	4551601	PA0032_pwm	7.47561	-	4.02e-06	0.427	CTGGTCTCGGCCAG	chromosome	4551143	4552630	PA4073|CDS|-	0	-	0
chromosome	5128693	5128706	PA0032_pwm	7.47561	+	4.02e-06	0.427	CTGGCCTCGACCAG	chromosome	5131082	5131155	PA4581.1|tRNA|tRNA-Arg	0	+	-2377
chromosome	5128693	5128706	PA0032_pwm	7.47561	-	4.02e-06	0.427	CTGGTCGAGGCCAG	chromosome	5128563	5129117	PA4580|CDS|-	0	-	0
chromosome	477548	477561	PA0032_pwm	7.19512	-	4.31e-06	0.427	CTGGCCTTGACCAG	chromosome	471749	472023	PA0424_promoter|antibiotic resistance	0	-	-5526
chromosome	477548	477561	PA0032_pwm	7.19512	-	4.31e-06	0.427	CTGGCCTTGACCAG	chromosome	471750	472023	PA0424_promoter|ROS	0	-	-5526
chromosome	477548	477561	PA0032_pwm	7.19512	+	4.31e-06	0.427	CTGGTCAAGGCCAG	chromosome	476333	477790	PA0427|antibiotic resistance	0	+	0
chromosome	477548	477561	PA0032_pwm	7.19512	+	4.31e-06	0.427	CTGGTCAAGGCCAG	chromosome	476333	477790	PA0427|CDS|oprM	0	+	0
chromosome	1685209	1685222	PA0032_pwm	7.19512	-	4.31e-06	0.427	CTGGCCAAGACCAG	chromosome	1684941	1687376	PA1549|CDS|copA2	0	-	0
chromosome	1685209	1685222	PA0032_pwm	7.19512	+	4.31e-06	0.427	CTGGTCTTGGCCAG	chromosome	1696467	1697099	PA1558|CDS|-	0	+	-11246
chromosome	4513977	4513990	PA0032_pwm	6.90244	-	4.44e-06	0.427	CTGGTCGCGACCAG	chromosome	4513168	4513884	PA4032|CDS|-	0	-	-94
chromosome	4513977	4513990	PA0032_pwm	6.90244	+	4.44e-06	0.427	CTGGTCGCGACCAG	chromosome	4513885	4514078	PA4033_promoter|biofilm	0	+	0
chromosome	5432551	5432564	PA0032_pwm	6.90244	-	4.44e-06	0.427	CCGGTCTCGACCAG	chromosome	5431381	5433291	PA4839|CDS|speA	0	-	0
chromosome	5432551	5432564	PA0032_pwm	6.90244	+	4.44e-06	0.427	CTGGTCGAGACCGG	chromosome	5435727	5436078	PA4843_promoter|biofilm	0	+	-3164
chromosome	604748	604761	PA0032_pwm	6.62195	+	4.57e-06	0.427	CCGGTCTTGACCAG	chromosome	606160	608157	PA0548|CDS|tktA	0	+	-1400
chromosome	604748	604761	PA0032_pwm	6.62195	-	4.57e-06	0.427	CTGGTCAAGACCGG	chromosome	603706	604896	PA0546|CDS|metK	0	-	0
chromosome	933565	933578	PA0032_pwm	6.62195	+	4.57e-06	0.427	CCGGTCTTGACCAG	chromosome	935427	935975	PA0856|CDS|-	0	+	-1850
chromosome	933565	933578	PA0032_pwm	6.62195	-	4.57e-06	0.427	CTGGTCAAGACCGG	chromosome	932718	934112	PA0854|CDS|fumC2	0	-	0
chromosome	2459390	2459403	PA0032_pwm	6.62195	+	4.57e-06	0.427	CTGGACGAGACCAG	chromosome	2458295	2460283	PA2235|biofilm	0	+	0
chromosome	2459390	2459403	PA0032_pwm	6.62195	+	4.57e-06	0.427	CTGGACGAGACCAG	chromosome	2458295	2460283	PA2235|CDS|pslE	0	+	0
chromosome	2459390	2459403	PA0032_pwm	6.62195	-	4.57e-06	0.427	CTGGTCTCGTCCAG	chromosome	2450766	2451706	PA2226_promoter|QS	0	-	-7685
chromosome	2459390	2459403	PA0032_pwm	6.62195	-	4.57e-06	0.427	CTGGTCTCGTCCAG	chromosome	2450766	2451706	PA2227_promoter|antibiotic resistance	0	-	-7685
chromosome	2459390	2459403	PA0032_pwm	6.62195	-	4.57e-06	0.427	CTGGTCTCGTCCAG	chromosome	2450766	2451706	PA2227_promoter|QS	0	-	-7685
chromosome	2459390	2459403	PA0032_pwm	6.62195	-	4.57e-06	0.427	CTGGTCTCGTCCAG	chromosome	2450766	2451706	PA2227_promoter|T3SS	0	-	-7685
chromosome	3161441	3161454	PA0032_pwm	6.62195	-	4.57e-06	0.427	CTGGGCAAGACCAG	chromosome	3160651	3161481	PA2806|CDS|-	0	-	0
chromosome	3161441	3161454	PA0032_pwm	6.62195	+	4.57e-06	0.427	CTGGTCTTGCCCAG	chromosome	3162580	3162704	PA2809_promoter|antibiotic resistance	0	+	-1127
chromosome	3161441	3161454	PA0032_pwm	6.62195	+	4.57e-06	0.427	CTGGTCTTGCCCAG	chromosome	3162580	3162704	PA2809_promoter|T3SS	0	+	-1127
chromosome	3161441	3161454	PA0032_pwm	6.62195	+	4.57e-06	0.427	CTGGTCTTGCCCAG	chromosome	3162580	3162704	PA2810_promoter|antibiotic resistance	0	+	-1127
chromosome	3161441	3161454	PA0032_pwm	6.62195	+	4.57e-06	0.427	CTGGTCTTGCCCAG	chromosome	3162580	3162704	PA2810_promoter|T3SS	0	+	-1127
chromosome	846304	846317	PA0032_pwm	6.4878	-	4.59e-06	0.427	CTGGCCTGGACCAG	chromosome	845793	848192	PA0779|CDS|asrA	0	-	0
chromosome	846304	846317	PA0032_pwm	6.4878	+	4.59e-06	0.427	CTGGTCCAGGCCAG	chromosome	848383	849135	PA0780|CDS|pruR	0	+	-2067
chromosome	3224229	3224242	PA0032_pwm	6.4878	+	4.59e-06	0.427	CTGGCCTGGACCAG	chromosome	3231218	3231859	PA2878|CDS|-	0	+	-6977
chromosome	3224229	3224242	PA0032_pwm	6.4878	-	4.59e-06	0.427	CTGGTCCAGGCCAG	chromosome	3223736	3224533	PA2871|CDS|-	0	-	0
chromosome	4599522	4599535	PA0032_pwm	6.4878	+	4.59e-06	0.427	CTGGCCTGGACCAG	chromosome	4602503	4603888	PA4115|CDS|-	0	+	-2969
chromosome	4599522	4599535	PA0032_pwm	6.4878	-	4.59e-06	0.427	CTGGTCCAGGCCAG	chromosome	4595849	4600102	PA4112|CDS|-	0	-	0
chromosome	4084243	4084256	PA0032_pwm	6.04878	+	4.66e-06	0.427	CTGGCATAGGCCAG	chromosome	4095172	4095957	PA3657|CDS|map	0	+	-10917
chromosome	4084243	4084256	PA0032_pwm	6.04878	-	4.66e-06	0.427	CTGGCCTATGCCAG	chromosome	4083444	4084505	PA3646|CDS|lpxD	0	-	0
chromosome	1236222	1236235	PA0032_pwm	5.93902	+	4.72e-06	0.427	ATGGTCTAGGCCAG	chromosome	1236644	1237546	PA1145|CDS|-	0	+	-410
chromosome	1236222	1236235	PA0032_pwm	5.93902	-	4.72e-06	0.427	CTGGCCTAGACCAT	chromosome	1234816	1236150	PA1144|CDS|-	0	-	-73
chromosome	3158894	3158907	PA0032_pwm	5.93902	-	4.72e-06	0.427	ATGGTCTAGGCCAG	chromosome	3158073	3158792	PA2802|CDS|-	0	-	-103
chromosome	3158894	3158907	PA0032_pwm	5.93902	+	4.72e-06	0.427	CTGGCCTAGACCAT	chromosome	3158926	3159669	PA2803|CDS|-	0	+	-20
chromosome	2072258	2072271	PA0032_pwm	5.91463	+	4.82e-06	0.427	CCGGTCTGGACCAG	chromosome	2071721	2072938	PA1901|CDS|phzC2	0	+	0
chromosome	2072258	2072271	PA0032_pwm	5.91463	+	4.82e-06	0.427	CCGGTCTGGACCAG	chromosome	2071721	2072938	PA1901|QS	0	+	0
chromosome	2072258	2072271	PA0032_pwm	5.91463	-	4.82e-06	0.427	CTGGTCCAGACCGG	chromosome	2067961	2068728	PA1897|CDS|-	0	-	-3531
chromosome	4715363	4715376	PA0032_pwm	5.91463	+	4.82e-06	0.427	CCGGTCTGGACCAG	chromosome	4714826	4716043	PA4212|CDS|phzC1	0	+	0
chromosome	4715363	4715376	PA0032_pwm	5.91463	+	4.82e-06	0.427	CCGGTCTGGACCAG	chromosome	4714826	4716043	PA4212|QS	0	+	0
chromosome	4715363	4715376	PA0032_pwm	5.91463	-	4.82e-06	0.427	CTGGTCCAGACCGG	chromosome	4713100	4713795	PA4209_promoter|QS	0	-	-1569
chromosome	2867741	2867754	PA0032_pwm	5.63415	+	5.09e-06	0.427	CCGGTGTAGACCAG	chromosome	2876555	2877367	PA2545|CDS|xthA	0	+	-8802
chromosome	2867741	2867754	PA0032_pwm	5.63415	-	5.09e-06	0.427	CTGGTCTACACCGG	chromosome	2867542	2869302	PA2540|CDS|-	0	-	0
chromosome	4885406	4885419	PA0032_pwm	5.63415	+	5.09e-06	0.427	CAGGTCTCGACCAG	chromosome	4890286	4891344	PA4362|CDS|-	0	+	-4868
chromosome	4885406	4885419	PA0032_pwm	5.63415	-	5.09e-06	0.427	CTGGTCGAGACCTG	chromosome	4884961	4887261	PA4358|CDS|feoB	0	-	0
chromosome	5023331	5023344	PA0032_pwm	5.63415	-	5.09e-06	0.427	CGGGTCAAGACCAG	chromosome	5020402	5024952	PA4489|CDS|magD	0	-	0
chromosome	5023331	5023344	PA0032_pwm	5.63415	+	5.09e-06	0.427	CTGGTCTTGACCCG	chromosome	5030525	5031235	PA4495|CDS|-	0	+	-7182
chromosome	5167702	5167715	PA0032_pwm	5.63415	-	5.09e-06	0.427	CTGGTCGACACCAG	chromosome	5167284	5168645	PA4609|CDS|radA	0	-	0
chromosome	5167702	5167715	PA0032_pwm	5.63415	+	5.09e-06	0.427	CTGGTGTCGACCAG	chromosome	5168755	5169189	PA4610|CDS|-	0	+	-1041
chromosome	5713791	5713804	PA0032_pwm	5.63415	-	5.09e-06	0.427	CTGGTCTCCACCAG	chromosome	5713232	5714032	PA5076|CDS|-	0	-	0
chromosome	5713791	5713804	PA0032_pwm	5.63415	+	5.09e-06	0.427	CTGGTGGAGACCAG	chromosome	5720469	5720945	PA5081|CDS|-	0	+	-6666
chromosome	2391621	2391634	PA0032_pwm	5.47561	-	5.17e-06	0.427	CCGGCATAGACCAG	chromosome	2388346	2389887	PA2165|CDS|-	0	-	-1735
chromosome	2391621	2391634	PA0032_pwm	5.47561	+	5.17e-06	0.427	CTGGTCTATGCCGG	chromosome	2390949	2392046	PA2167|CDS|-	0	+	0
chromosome	3606065	3606078	PA0032_pwm	5.47561	-	5.17e-06	0.427	CTGGCCGATACCAG	chromosome	3603994	3605007	PA3215|CDS|-	0	-	-1059
chromosome	3606065	3606078	PA0032_pwm	5.47561	+	5.17e-06	0.427	CTGGTATCGGCCAG	chromosome	3605684	3607075	PA3217|biofilm	0	+	0
chromosome	3606065	3606078	PA0032_pwm	5.47561	+	5.17e-06	0.427	CTGGTATCGGCCAG	chromosome	3605684	3607075	PA3217|CDS|cyaB	0	+	0
chromosome	3606065	3606078	PA0032_pwm	5.47561	+	5.17e-06	0.427	CTGGTATCGGCCAG	chromosome	3605684	3607075	PA3217|motility	0	+	0
chromosome	4667079	4667092	PA0032_pwm	5.47561	+	5.17e-06	0.427	CTGGCCTATCCCAG	chromosome	4666836	4667768	PA4170|CDS|-	0	+	0
chromosome	4667079	4667092	PA0032_pwm	5.47561	-	5.17e-06	0.427	CTGGGATAGGCCAG	chromosome	4666327	4666755	PA4169|CDS|-	0	-	-325
chromosome	5588013	5588026	PA0032_pwm	5.47561	+	5.17e-06	0.427	CCGGTATAGGCCAG	chromosome	5601149	5603095	PA4986|CDS|-	0	+	-13124
chromosome	5588013	5588026	PA0032_pwm	5.47561	-	5.17e-06	0.427	CTGGCCTATACCGG	chromosome	5587574	5589253	PA4977|CDS|aruI	0	-	0
chromosome	5686801	5686814	PA0032_pwm	5.47561	+	5.17e-06	0.427	CTGGCCGATACCAG	chromosome	5687496	5689715	PA5050|CDS|priA	0	+	-683
chromosome	5686801	5686814	PA0032_pwm	5.47561	-	5.17e-06	0.427	CTGGTATCGGCCAG	chromosome	5686278	5687045	PA5048|CDS|-	0	-	0
chromosome	3215149	3215162	PA0032_pwm	5.35366	-	5.63e-06	0.427	CTGGTCTCGAACAG	chromosome	3213044	3213484	PA2860|CDS|-	0	-	-1666
chromosome	3215149	3215162	PA0032_pwm	5.35366	+	5.63e-06	0.427	CTGTTCGAGACCAG	chromosome	3214282	3215217	PA2862|CDS|lipA	0	+	0
chromosome	3215149	3215162	PA0032_pwm	5.35366	+	5.63e-06	0.427	CTGTTCGAGACCAG	chromosome	3214282	3215217	PA2862|T6SS	0	+	0
chromosome	3315211	3315224	PA0032_pwm	5.35366	-	5.63e-06	0.427	CTGATCGAGACCAG	chromosome	3315057	3315689	PA2955|CDS|-	0	-	0
chromosome	3315211	3315224	PA0032_pwm	5.35366	+	5.63e-06	0.427	CTGGTCTCGATCAG	chromosome	3317524	3318657	PA2958|CDS|-	0	+	-2301
chromosome	3973194	3973207	PA0032_pwm	5.35366	+	5.63e-06	0.427	CTGGTCTTCACCAG	chromosome	3973014	3974117	PA3547|biofilm	0	+	0
chromosome	3973194	3973207	PA0032_pwm	5.35366	+	5.63e-06	0.427	CTGGTCTTCACCAG	chromosome	3973014	3974117	PA3547|CDS|algL	0	+	0
chromosome	3973194	3973207	PA0032_pwm	5.35366	-	5.63e-06	0.427	CTGGTGAAGACCAG	chromosome	3958288	3958755	PA3536|CDS|-	0	-	-14440
chromosome	4075278	4075291	PA0032_pwm	5.35366	-	5.63e-06	0.427	CTGGACTACACCAG	chromosome	4075157	4078678	PA3640|CDS|dnaE	0	-	0
chromosome	4075278	4075291	PA0032_pwm	5.35366	+	5.63e-06	0.427	CTGGTGTAGTCCAG	chromosome	4095172	4095957	PA3657|CDS|map	0	+	-19882
chromosome	4901142	4901155	PA0032_pwm	5.35366	+	5.63e-06	0.427	CTGCTCTTGACCAG	chromosome	4901127	4902191	PA4372|CDS|-	0	+	0
chromosome	4901142	4901155	PA0032_pwm	5.35366	+	5.63e-06	0.427	CTGCTCTTGACCAG	chromosome	4901127	4902191	PA4372|siderophore	0	+	0
chromosome	4901142	4901155	PA0032_pwm	5.35366	-	5.63e-06	0.427	CTGGTCAAGAGCAG	chromosome	4897427	4897999	PA4369|CDS|-	0	-	-3144
chromosome	5493554	5493567	PA0032_pwm	5.35366	-	5.63e-06	0.427	CTGGTCTCGAACAG	chromosome	5491182	5491345	PA4896_promoter|siderophore	0	-	-2210
chromosome	5493554	5493567	PA0032_pwm	5.35366	+	5.63e-06	0.427	CTGTTCGAGACCAG	chromosome	5491346	5494315	PA4897|CDS|-	0	+	0
chromosome	5493554	5493567	PA0032_pwm	5.35366	+	5.63e-06	0.427	CTGTTCGAGACCAG	chromosome	5491346	5494315	PA4897|siderophore	0	+	0
chromosome	4421291	4421304	PA0032_pwm	5.19512	-	5.67e-06	0.427	CTGGCATTGACCAG	chromosome	4420204	4421799	PA3943|CDS|-	0	-	0
chromosome	4421291	4421304	PA0032_pwm	5.19512	+	5.67e-06	0.427	CTGGTCAATGCCAG	chromosome	4428412	4429041	PA3948|CDS|rocA1	0	+	-7109
chromosome	5535012	5535025	PA0032_pwm	5.08537	+	5.73e-06	0.427	ATGGTCTTGACCAG	chromosome	5541614	5541700	PA4937.1|tRNA|tRNA-Leu	0	+	-6590
chromosome	5535012	5535025	PA0032_pwm	5.08537	-	5.73e-06	0.427	CTGGTCAAGACCAT	chromosome	5534162	5535556	PA4931|CDS|dnaB	0	-	0
chromosome	187051	187064	PA0032_pwm	4.92683	-	5.86e-06	0.427	CGGGTCCAGACCAG	chromosome	185957	186754	PA0163|CDS|-	0	-	-298
chromosome	187051	187064	PA0032_pwm	4.92683	+	5.86e-06	0.427	CTGGTCTGGACCCG	chromosome	186832	188448	PA0164|CDS|-	0	+	0
chromosome	380227	380240	PA0032_pwm	4.92683	-	5.86e-06	0.427	CGGGTCTGGACCAG	chromosome	377893	378095	PA0334_promoter|antibiotic resistance	0	-	-2133
chromosome	380227	380240	PA0032_pwm	4.92683	+	5.86e-06	0.427	CTGGTCCAGACCCG	chromosome	378598	380877	PA0337|antibiotic resistance	0	+	0
chromosome	380227	380240	PA0032_pwm	4.92683	+	5.86e-06	0.427	CTGGTCCAGACCCG	chromosome	378598	380877	PA0337|CDS|ptsP	0	+	0
chromosome	1619122	1619135	PA0032_pwm	4.90244	-	5.93e-06	0.427	CCGGTCGATACCAG	chromosome	1617489	1618265	PA1490|CDS|-	0	-	-858
chromosome	1619122	1619135	PA0032_pwm	4.90244	+	5.93e-06	0.427	CTGGTATCGACCGG	chromosome	1618612	1619847	PA1491|CDS|-	0	+	0
chromosome	1424718	1424731	PA0032_pwm	4.64634	-	6e-06	0.427	CAGGTCTGGACCAG	chromosome	1422355	1423266	PA1312|CDS|-	0	-	-1453
chromosome	1424718	1424731	PA0032_pwm	4.64634	+	6e-06	0.427	CTGGTCCAGACCTG	chromosome	1423374	1424732	PA1313|CDS|-	0	+	0
chromosome	4565246	4565259	PA0032_pwm	4.64634	+	6e-06	0.427	CAGGTCTGGACCAG	chromosome	4570096	4570920	PA4087|CDS|-	0	+	-4838
chromosome	4565246	4565259	PA0032_pwm	4.64634	-	6e-06	0.427	CTGGTCCAGACCTG	chromosome	4564684	4565424	PA4083|CDS|cupB4	0	-	0
chromosome	4565246	4565259	PA0032_pwm	4.64634	-	6e-06	0.427	CTGGTCCAGACCTG	chromosome	4564684	4565424	PA4083|motility	0	-	0
chromosome	3802658	3802671	PA0032_pwm	4.62195	-	6.11e-06	0.427	CTGGAAGAGACCAG	chromosome	3802567	3803343	PA3397|CDS|fprA	0	-	0
chromosome	3802658	3802671	PA0032_pwm	4.62195	+	6.11e-06	0.427	CTGGTCTCTTCCAG	chromosome	3803617	3804543	PA3398|CDS|-	0	+	-947
chromosome	4909813	4909826	PA0032_pwm	4.62195	+	6.11e-06	0.427	CCGGAATAGACCAG	chromosome	4913041	4913835	PA4382|CDS|-	0	+	-3216
chromosome	4909813	4909826	PA0032_pwm	4.62195	-	6.11e-06	0.427	CTGGTCTATTCCGG	chromosome	4909401	4910105	PA4378|CDS|warB	0	-	0
chromosome	2505015	2505028	PA0032_pwm	4.58537	+	6.15e-06	0.427	CTGGCCGAGACCAC	chromosome	2505645	2506535	PA2276|CDS|-	0	+	-618
chromosome	2505015	2505028	PA0032_pwm	4.58537	-	6.15e-06	0.427	GTGGTCTCGGCCAG	chromosome	2504375	2505436	PA2275|CDS|-	0	-	0
chromosome	6053727	6053740	PA0032_pwm	4.58537	+	6.15e-06	0.427	CTGGTCGAGGCCAC	chromosome	6056877	6058253	PA5379|CDS|sdaB	0	+	-3138
chromosome	6053727	6053740	PA0032_pwm	4.58537	-	6.15e-06	0.427	GTGGCCTCGACCAG	chromosome	6053412	6054590	PA5376|CDS|cbcV	0	-	0
chromosome	6147894	6147907	PA0032_pwm	4.58537	+	6.15e-06	0.427	CTGGTCGAGGCCAC	chromosome	6147021	6148322	PA5456|CDS|-	0	+	0
chromosome	6147894	6147907	PA0032_pwm	4.58537	-	6.15e-06	0.427	GTGGCCTCGACCAG	chromosome	6144077	6144991	PA5454|CDS|rmd	0	-	-2904
chromosome	822716	822729	PA0032_pwm	4.4878	-	6.23e-06	0.427	CTGGTCGAGGCCAA	chromosome	821902	822885	PA0754|CDS|-	0	-	0
chromosome	822716	822729	PA0032_pwm	4.4878	+	6.23e-06	0.427	TTGGCCTCGACCAG	chromosome	824409	825080	PA0756|CDS|-	0	+	-1681
chromosome	1186888	1186901	PA0032_pwm	4.4878	+	6.23e-06	0.427	CTGGTCGAGGCCAA	chromosome	1186606	1186986	PA1095|CDS|-	0	+	0
chromosome	1186888	1186901	PA0032_pwm	4.4878	+	6.23e-06	0.427	CTGGTCGAGGCCAA	chromosome	1186606	1186986	PA1095|motility	0	+	0
chromosome	1186888	1186901	PA0032_pwm	4.4878	-	6.23e-06	0.427	TTGGCCTCGACCAG	chromosome	1161856	1162977	PA1074|CDS|braC	0	-	-23912
chromosome	1421900	1421913	PA0032_pwm	4.4878	+	6.23e-06	0.427	CTGGCCGAGACCAA	chromosome	1421477	1422304	PA1311|CDS|phnX	0	+	0
chromosome	1421900	1421913	PA0032_pwm	4.4878	-	6.23e-06	0.427	TTGGTCTCGGCCAG	chromosome	1419298	1420158	PA1309|CDS|-	0	-	-1743
chromosome	2049553	2049566	PA0032_pwm	4.4878	-	6.23e-06	0.427	CTGGTCGAGGCCAA	chromosome	2049237	2049791	PA1879|CDS|-	0	-	0
chromosome	2049553	2049566	PA0032_pwm	4.4878	+	6.23e-06	0.427	TTGGCCTCGACCAG	chromosome	2052611	2052940	PA1883_promoter|antibiotic resistance	0	+	-3046
chromosome	2324350	2324363	PA0032_pwm	4.4878	-	6.23e-06	0.427	CTGGTCTCGGCCAA	chromosome	2323554	2324783	PA2113|antibiotic resistance	0	-	0
chromosome	2324350	2324363	PA0032_pwm	4.4878	-	6.23e-06	0.427	CTGGTCTCGGCCAA	chromosome	2323554	2324783	PA2113|CDS|opdO	0	-	0
chromosome	2324350	2324363	PA0032_pwm	4.4878	+	6.23e-06	0.427	TTGGCCGAGACCAG	chromosome	2326334	2327287	PA2115|CDS|-	0	+	-1972
chromosome	2345962	2345975	PA0032_pwm	4.4878	+	6.23e-06	0.427	CTGGTCGAGGCCAA	chromosome	2343862	2346480	PA2130|CDS|cupA3	0	+	0
chromosome	2345962	2345975	PA0032_pwm	4.4878	+	6.23e-06	0.427	CTGGTCGAGGCCAA	chromosome	2343862	2346480	PA2130|motility	0	+	0
chromosome	2345962	2345975	PA0032_pwm	4.4878	-	6.23e-06	0.427	TTGGCCTCGACCAG	chromosome	2341641	2342492	PA2126_promoter|motility	0	-	-3471
chromosome	2345962	2345975	PA0032_pwm	4.4878	-	6.23e-06	0.427	TTGGCCTCGACCAG	chromosome	2341641	2342492	PA2127_promoter|motility	0	-	-3471
chromosome	2516829	2516842	PA0032_pwm	4.4878	+	6.23e-06	0.427	CGGGTATAGGCCAG	chromosome	2549748	2549906	PA2311|CDS|-	0	+	-32907
chromosome	2516829	2516842	PA0032_pwm	4.4878	-	6.23e-06	0.427	CTGGCCTATACCCG	chromosome	2516429	2518561	PA2289|CDS|-	0	-	0
chromosome	1064762	1064775	PA0032_pwm	4.36585	-	6.45e-06	0.427	CTGATCTGGACCAG	chromosome	1064555	1065103	PA0982|CDS|-	0	-	0
chromosome	1064762	1064775	PA0032_pwm	4.36585	+	6.45e-06	0.427	CTGGTCCAGATCAG	chromosome	1065138	1065425	PA0983|CDS|-	0	+	-364
chromosome	4379820	4379833	PA0032_pwm	4.36585	-	6.45e-06	0.427	CTGGTCCAGAACAG	chromosome	4379687	4381249	PA3910|CDS|eddA	0	-	0
chromosome	4379820	4379833	PA0032_pwm	4.36585	+	6.45e-06	0.427	CTGTTCTGGACCAG	chromosome	4389231	4391609	PA3920|CDS|copA1	0	+	-9399
chromosome	4709278	4709291	PA0032_pwm	4.36585	+	6.45e-06	0.427	CAGGTCTACACCAG	chromosome	4707535	4710624	PA4207|antibiotic resistance	0	+	0
chromosome	4709278	4709291	PA0032_pwm	4.36585	+	6.45e-06	0.427	CAGGTCTACACCAG	chromosome	4707535	4710624	PA4207|CDS|mexI	0	+	0
chromosome	4709278	4709291	PA0032_pwm	4.36585	-	6.45e-06	0.427	CTGGTGTAGACCTG	chromosome	4702042	4703097	PA4202|CDS|nmoA	0	-	-6182
chromosome	973547	973560	PA0032_pwm	4.30488	+	6.52e-06	0.427	CTGGTCAAGGCCAC	chromosome	973064	973753	PA0889|CDS|aotQ	0	+	0
chromosome	973547	973560	PA0032_pwm	4.30488	-	6.52e-06	0.427	GTGGCCTTGACCAG	chromosome	959484	960380	PA0877|CDS|-	0	-	-13168
chromosome	1737254	1737267	PA0032_pwm	4.30488	+	6.52e-06	0.427	CTGGTCAAGGCCAC	chromosome	1736189	1737418	PA1595|CDS|-	0	+	0
chromosome	1737254	1737267	PA0032_pwm	4.30488	-	6.52e-06	0.427	GTGGCCTTGACCAG	chromosome	1734827	1735063	PA1592|CDS|-	0	-	-2192
chromosome	3280007	3280020	PA0032_pwm	4.30488	+	6.52e-06	0.427	CTGGTCAAGGCCAC	chromosome	3279479	3280168	PA2924|CDS|hisQ	0	+	0
chromosome	3280007	3280020	PA0032_pwm	4.30488	-	6.52e-06	0.427	GTGGCCTTGACCAG	chromosome	3276319	3277308	PA2921|CDS|-	0	-	-2700
chromosome	2353554	2353567	PA0032_pwm	4.20732	+	6.63e-06	0.427	CTGGTCAAGGCCAA	chromosome	2353086	2355608	PA2138|CDS|ligD	0	+	0
chromosome	2353554	2353567	PA0032_pwm	4.20732	-	6.63e-06	0.427	TTGGCCTTGACCAG	chromosome	2351906	2352430	PA2136|CDS|-	0	-	-1125
chromosome	3442979	3442992	PA0032_pwm	4.20732	+	6.63e-06	0.427	CTGGCCAAGACCAA	chromosome	3442823	3443803	PA3070|CDS|-	0	+	0
chromosome	3442979	3442992	PA0032_pwm	4.20732	-	6.63e-06	0.427	TTGGTCTTGGCCAG	chromosome	3441713	3442330	PA3069|CDS|-	0	-	-650
chromosome	3725643	3725656	PA0032_pwm	4.20732	-	6.63e-06	0.427	CAGGTATAGGCCAG	chromosome	3724456	3725154	PA3322|CDS|-	0	-	-490
chromosome	3725643	3725656	PA0032_pwm	4.20732	+	6.63e-06	0.427	CTGGCCTATACCTG	chromosome	3725580	3726455	PA3323|CDS|-	0	+	0
chromosome	4762705	4762718	PA0032_pwm	4.20732	-	6.63e-06	0.427	CTGGCCAAGACCAA	chromosome	4762659	4762925	PA4254|CDS|rpsQ	0	-	0
chromosome	4762705	4762718	PA0032_pwm	4.20732	+	6.63e-06	0.427	TTGGTCTTGGCCAG	chromosome	4781285	4781785	PA4272.1_promoter|QS	0	+	-18568
chromosome	611992	612005	PA0032_pwm	4.0122	+	6.99e-06	0.427	CTGGTCGAGACCGC	chromosome	611281	612444	PA0552|CDS|pgk	0	+	0
chromosome	611992	612005	PA0032_pwm	4.0122	+	6.99e-06	0.427	CTGGTCGAGACCGC	chromosome	611281	612444	PA0552|ROS	0	+	0
chromosome	611992	612005	PA0032_pwm	4.0122	-	6.99e-06	0.427	GCGGTCTCGACCAG	chromosome	609202	609999	PA0550|CDS|-	0	-	-1994
chromosome	1088563	1088576	PA0032_pwm	4.0122	-	6.99e-06	0.427	CTGGTCGAGCCCAC	chromosome	1087096	1087842	PA1003_promoter|biofilm	0	-	-722
chromosome	1088563	1088576	PA0032_pwm	4.0122	-	6.99e-06	0.427	CTGGTCGAGCCCAC	chromosome	1087096	1087842	PA1003_promoter|QS	0	-	-722
chromosome	1088563	1088576	PA0032_pwm	4.0122	-	6.99e-06	0.427	CTGGTCGAGCCCAC	chromosome	1087096	1087842	PA1003_promoter|T6SS	0	-	-722
chromosome	1088563	1088576	PA0032_pwm	4.0122	+	6.99e-06	0.427	GTGGGCTCGACCAG	chromosome	1087843	1088901	PA1004|CDS|nadA	0	+	0
chromosome	2850618	2850631	PA0032_pwm	4.0122	-	6.99e-06	0.427	CTGGGCTCGACCAC	chromosome	2847776	2850886	PA2526|antibiotic resistance	0	-	0
chromosome	2850618	2850631	PA0032_pwm	4.0122	-	6.99e-06	0.427	CTGGGCTCGACCAC	chromosome	2847776	2850886	PA2526|CDS|muxC	0	-	0
chromosome	2850618	2850631	PA0032_pwm	4.0122	+	6.99e-06	0.427	GTGGTCGAGCCCAG	chromosome	2855548	2856981	PA2529|CDS|-	0	+	-4918
chromosome	3030560	3030573	PA0032_pwm	4.0122	-	6.99e-06	0.427	CTGGTCGAGCCCAC	chromosome	3030436	3031398	PA2683|CDS|-	0	-	0
chromosome	3030560	3030573	PA0032_pwm	4.0122	+	6.99e-06	0.427	GTGGGCTCGACCAG	chromosome	3037686	3037885	PA2686_promoter|siderophore	0	+	-7114
chromosome	4340878	4340891	PA0032_pwm	4.0122	-	6.99e-06	0.427	CTGGTCTCGCCCAC	chromosome	4338261	4342046	PA3875|antibiotic resistance	0	-	0
chromosome	4340878	4340891	PA0032_pwm	4.0122	-	6.99e-06	0.427	CTGGTCTCGCCCAC	chromosome	4338261	4342046	PA3875|CDS|narG	0	-	0
chromosome	4340878	4340891	PA0032_pwm	4.0122	+	6.99e-06	0.427	GTGGGCGAGACCAG	chromosome	4345010	4346878	PA3878|CDS|narX	0	+	-4120
chromosome	5823397	5823410	PA0032_pwm	4.0122	-	6.99e-06	0.427	CCGGTCTCGACCAC	chromosome	5798693	5799430	PA5150|CDS|-	0	-	-23968
chromosome	5823397	5823410	PA0032_pwm	4.0122	+	6.99e-06	0.427	GTGGTCGAGACCGG	chromosome	5822380	5823636	PA5171|CDS|arcA	0	+	0
chromosome	6152470	6152483	PA0032_pwm	4.0122	-	6.99e-06	0.427	CTGGTCGCGACCAC	chromosome	6144077	6144991	PA5454|CDS|rmd	0	-	-7480
chromosome	6152470	6152483	PA0032_pwm	4.0122	+	6.99e-06	0.427	GTGGTCGCGACCAG	chromosome	6152386	6152721	PA5463|CDS|-	0	+	0
chromosome	4846899	4846912	PA0032_pwm	3.93902	-	7.04e-06	0.427	ATGGTATAGGCCAG	chromosome	4844271	4845713	PA4316|CDS|sbcB	0	-	-1187
chromosome	4846899	4846912	PA0032_pwm	3.93902	+	7.04e-06	0.427	CTGGCCTATACCAT	chromosome	4846713	4847510	PA4318|CDS|-	0	+	0
chromosome	180123	180136	PA0032_pwm	3.91463	-	7.31e-06	0.427	CTGGTCGAGACCGA	chromosome	165219	165737	PA0145|CDS|-	0	-	-14387
chromosome	180123	180136	PA0032_pwm	3.91463	+	7.31e-06	0.427	TCGGTCTCGACCAG	chromosome	179522	182569	PA0158|antibiotic resistance	0	+	0
chromosome	180123	180136	PA0032_pwm	3.91463	+	7.31e-06	0.427	TCGGTCTCGACCAG	chromosome	179522	182569	PA0158|CDS|triC	0	+	0
chromosome	952890	952903	PA0032_pwm	3.91463	-	7.31e-06	0.427	CTGGTCGAGACCGA	chromosome	952619	953407	PA0872|CDS|phhA	0	-	0
chromosome	952890	952903	PA0032_pwm	3.91463	+	7.31e-06	0.427	TCGGTCTCGACCAG	chromosome	953691	955250	PA0873|CDS|phhR	0	+	-789
chromosome	1540695	1540708	PA0032_pwm	3.91463	-	7.31e-06	0.427	CTGGTCGCGACCAA	chromosome	1539749	1541131	PA1416|CDS|-	0	-	0
chromosome	1540695	1540708	PA0032_pwm	3.91463	+	7.31e-06	0.427	TTGGTCGCGACCAG	chromosome	1547437	1548330	PA1422|CDS|gbuR	0	+	-6730
chromosome	2453727	2453740	PA0032_pwm	3.91463	+	7.31e-06	0.427	CTGGTCGCGACCAA	chromosome	2453667	2455103	PA2231|biofilm	0	+	0
chromosome	2453727	2453740	PA0032_pwm	3.91463	+	7.31e-06	0.427	CTGGTCGCGACCAA	chromosome	2453667	2455103	PA2231|CDS|pslA	0	+	0
chromosome	2453727	2453740	PA0032_pwm	3.91463	-	7.31e-06	0.427	TTGGTCGCGACCAG	chromosome	2450766	2451706	PA2226_promoter|QS	0	-	-2022
chromosome	2453727	2453740	PA0032_pwm	3.91463	-	7.31e-06	0.427	TTGGTCGCGACCAG	chromosome	2450766	2451706	PA2227_promoter|antibiotic resistance	0	-	-2022
chromosome	2453727	2453740	PA0032_pwm	3.91463	-	7.31e-06	0.427	TTGGTCGCGACCAG	chromosome	2450766	2451706	PA2227_promoter|QS	0	-	-2022
chromosome	2453727	2453740	PA0032_pwm	3.91463	-	7.31e-06	0.427	TTGGTCGCGACCAG	chromosome	2450766	2451706	PA2227_promoter|T3SS	0	-	-2022
chromosome	3202133	3202146	PA0032_pwm	3.91463	+	7.31e-06	0.427	CTGGTCGAGACCGA	chromosome	3202293	3203312	PA2848|CDS|-	0	+	-148
chromosome	3202133	3202146	PA0032_pwm	3.91463	-	7.31e-06	0.427	TCGGTCTCGACCAG	chromosome	3201506	3202255	PA2847|CDS|-	0	-	0
chromosome	4050611	4050624	PA0032_pwm	3.91463	-	7.31e-06	0.427	CCGGTCTGTACCAG	chromosome	4045934	4048339	PA3613|CDS|-	0	-	-2273
chromosome	4050611	4050624	PA0032_pwm	3.91463	+	7.31e-06	0.427	CTGGTACAGACCGG	chromosome	4050005	4051075	PA3615|CDS|-	0	+	0
chromosome	847021	847034	PA0032_pwm	3.73171	+	7.67e-06	0.427	CTGGTCTTGCCCAC	chromosome	848383	849135	PA0780|CDS|pruR	0	+	-1350
chromosome	847021	847034	PA0032_pwm	3.73171	-	7.67e-06	0.427	GTGGGCAAGACCAG	chromosome	845793	848192	PA0779|CDS|asrA	0	-	0
chromosome	2155641	2155654	PA0032_pwm	3.73171	+	7.67e-06	0.427	CTGGGCAAGACCAC	chromosome	2155374	2157701	PA1973|CDS|pqqF	0	+	0
chromosome	2155641	2155654	PA0032_pwm	3.73171	-	7.67e-06	0.427	GTGGTCTTGCCCAG	chromosome	2151755	2153068	PA1971|CDS|braZ	0	-	-2574
chromosome	2182354	2182367	PA0032_pwm	3.63415	-	8.09e-06	0.427	CTGGTCAAGACCGA	chromosome	2182116	2182394	PA1996|CDS|ppiC1	0	-	0
chromosome	2182354	2182367	PA0032_pwm	3.63415	+	8.09e-06	0.427	TCGGTCTTGACCAG	chromosome	2185527	2186225	PA1999|CDS|dhcA	0	+	-3161
chromosome	2697481	2697494	PA0032_pwm	3.63415	-	8.09e-06	0.427	CTGGTCTTGCCCAA	chromosome	2696430	2697749	PA2414|CDS|-	0	-	0
chromosome	2697481	2697494	PA0032_pwm	3.63415	+	8.09e-06	0.427	TTGGGCAAGACCAG	chromosome	2698526	2700163	PA2416|CDS|treA	0	+	-1033
chromosome	3517377	3517390	PA0032_pwm	3.63415	-	8.09e-06	0.427	CTGCTCTCTACCAG	chromosome	3516938	3517858	PA3135|CDS|-	0	-	0
chromosome	3517377	3517390	PA0032_pwm	3.63415	+	8.09e-06	0.427	CTGGTAGAGAGCAG	chromosome	3517928	3518995	PA3136|CDS|-	0	+	-539
chromosome	4658819	4658832	PA0032_pwm	3.63415	+	8.09e-06	0.427	CTGGGCAAGACCAA	chromosome	4658450	4660159	PA4163|CDS|-	0	+	0
chromosome	4658819	4658832	PA0032_pwm	3.63415	-	8.09e-06	0.427	TTGGTCTTGCCCAG	chromosome	4657429	4658145	PA4162|CDS|-	0	-	-675
chromosome	4887960	4887973	PA0032_pwm	3.63415	-	8.09e-06	0.427	CTGGGCAAGACCAA	chromosome	4887722	4888195	PA4360|CDS|-	0	-	0
chromosome	4887960	4887973	PA0032_pwm	3.63415	+	8.09e-06	0.427	TTGGTCTTGCCCAG	chromosome	4890286	4891344	PA4362|CDS|-	0	+	-2314
chromosome	5569930	5569943	PA0032_pwm	3.63415	+	8.09e-06	0.427	CTGGACGAGACCAA	chromosome	5569090	5570628	PA4961|CDS|-	0	+	0
chromosome	5569930	5569943	PA0032_pwm	3.63415	-	8.09e-06	0.427	TTGGTCTCGTCCAG	chromosome	5568945	5569089	PA4960_promoter|antibiotic resistance	0	-	-842
chromosome	3769447	3769460	PA0032_pwm	3.59756	+	8.12e-06	0.427	CTGGTCTGGGCCAC	chromosome	3768184	3769530	PA3357|CDS|dsdA	0	+	0
chromosome	3769447	3769460	PA0032_pwm	3.59756	-	8.12e-06	0.427	GTGGCCCAGACCAG	chromosome	3766617	3767858	PA3356|CDS|pauA5	0	-	-1590
chromosome	4087271	4087284	PA0032_pwm	3.59756	-	8.12e-06	0.427	CTGGTCCAGGCCAC	chromosome	4085062	4087455	PA3648|CDS|opr86	0	-	0
chromosome	4087271	4087284	PA0032_pwm	3.59756	+	8.12e-06	0.427	GTGGCCTGGACCAG	chromosome	4095172	4095957	PA3657|CDS|map	0	+	-7889
chromosome	4278619	4278632	PA0032_pwm	3.59756	-	8.12e-06	0.427	CTGGCCCAGACCAC	chromosome	4277085	4278947	PA3821|CDS|secD	0	-	0
chromosome	4278619	4278632	PA0032_pwm	3.59756	+	8.12e-06	0.427	GTGGTCTGGGCCAG	chromosome	4281665	4281751	PA3824.1|tRNA|tRNA-Leu	0	+	-3034
chromosome	5132524	5132537	PA0032_pwm	3.59756	-	8.12e-06	0.427	CTGGTCCAGGCCAC	chromosome	5129173	5130768	PA4581|CDS|rtcR	0	-	-1757
chromosome	5132524	5132537	PA0032_pwm	3.59756	+	8.12e-06	0.427	GTGGCCTGGACCAG	chromosome	5131428	5132573	PA4582|CDS|-	0	+	0
chromosome	345390	345403	PA0032_pwm	3.5	-	8.16e-06	0.427	CTGGTCTGGGCCAA	chromosome	344303	346690	PA0305|CDS|hacB	0	-	0
chromosome	345390	345403	PA0032_pwm	3.5	+	8.16e-06	0.427	TTGGCCCAGACCAG	chromosome	346801	347853	PA0306|CDS|-	0	+	-1399
chromosome	1612717	1612730	PA0032_pwm	3.5	+	8.16e-06	0.427	CTGGTCCAGGCCAA	chromosome	1612126	1613226	PA1486|CDS|bapF	0	+	0
chromosome	1612717	1612730	PA0032_pwm	3.5	-	8.16e-06	0.427	TTGGCCTGGACCAG	chromosome	1609738	1610544	PA1484|CDS|-	0	-	-2174
chromosome	4422578	4422591	PA0032_pwm	3.5	+	8.16e-06	0.427	CTGGTCCAGGCCAA	chromosome	4428412	4429041	PA3948|CDS|rocA1	0	+	-5822
chromosome	4422578	4422591	PA0032_pwm	3.5	-	8.16e-06	0.427	TTGGCCTGGACCAG	chromosome	4422407	4422997	PA3945|CDS|-	0	-	0
chromosome	3279962	3279975	PA0032_pwm	3.45122	+	8.22e-06	0.427	CTGGTCAAGTCCAC	chromosome	3279479	3280168	PA2924|CDS|hisQ	0	+	0
chromosome	3279962	3279975	PA0032_pwm	3.45122	-	8.22e-06	0.427	GTGGACTTGACCAG	chromosome	3276319	3277308	PA2921|CDS|-	0	-	-2655
chromosome	1454355	1454368	PA0032_pwm	3.36585	+	8.35e-06	0.427	ACGGTATAGACCAG	chromosome	1457175	1457633	PA1343|CDS|-	0	+	-2808
chromosome	1454355	1454368	PA0032_pwm	3.36585	-	8.35e-06	0.427	CTGGTCTATACCGT	chromosome	1454201	1454869	PA1340|CDS|aatM	0	-	0
chromosome	1956707	1956720	PA0032_pwm	3.36585	-	8.35e-06	0.427	ATGGTATCGACCAG	chromosome	1952434	1952664	PA1798_promoter|antibiotic resistance	0	-	-4044
chromosome	1956707	1956720	PA0032_pwm	3.36585	-	8.35e-06	0.427	ATGGTATCGACCAG	chromosome	1952434	1952664	PA1798_promoter|QS	0	-	-4044
chromosome	1956707	1956720	PA0032_pwm	3.36585	-	8.35e-06	0.427	ATGGTATCGACCAG	chromosome	1952434	1952664	PA1799_promoter|antibiotic resistance	0	-	-4044
chromosome	1956707	1956720	PA0032_pwm	3.36585	-	8.35e-06	0.427	ATGGTATCGACCAG	chromosome	1952434	1952664	PA1799_promoter|QS	0	-	-4044
chromosome	1956707	1956720	PA0032_pwm	3.36585	+	8.35e-06	0.427	CTGGTCGATACCAT	chromosome	1956227	1958623	PA1803|antibiotic resistance	0	+	0
chromosome	1956707	1956720	PA0032_pwm	3.36585	+	8.35e-06	0.427	CTGGTCGATACCAT	chromosome	1956227	1958623	PA1803|CDS|lon	0	+	0
chromosome	1956707	1956720	PA0032_pwm	3.36585	+	8.35e-06	0.427	CTGGTCGATACCAT	chromosome	1956227	1958623	PA1803|QS	0	+	0
chromosome	61598	61611	PA0032_pwm	3.35366	+	8.92e-06	0.44	CTGCTCTATTCCAG	chromosome	61373	61726	PA0046|CDS|-	0	+	0
chromosome	61598	61611	PA0032_pwm	3.35366	-	8.92e-06	0.44	CTGGAATAGAGCAG	chromosome	57212	58594	PA0043|CDS|-	0	-	-3005
chromosome	3541134	3541147	PA0032_pwm	3.35366	+	8.92e-06	0.44	CTGGTATCGACAAG	chromosome	3560621	3561955	PA3170|CDS|-	0	+	-19475
chromosome	3541134	3541147	PA0032_pwm	3.35366	-	8.92e-06	0.44	CTTGTCGATACCAG	chromosome	3540782	3542671	PA3157|CDS|-	0	-	0
chromosome	4771052	4771065	PA0032_pwm	3.35366	+	8.92e-06	0.44	CCGGTATAGAACAG	chromosome	4781285	4781785	PA4272.1_promoter|QS	0	+	-10221
chromosome	4771052	4771065	PA0032_pwm	3.35366	-	8.92e-06	0.44	CTGTTCTATACCGG	chromosome	4769035	4771155	PA4266|CDS|fusA1	0	-	0
chromosome	5643662	5643675	PA0032_pwm	3.35366	+	8.92e-06	0.44	CTGCTCAATACCAG	chromosome	5641010	5643709	PA5017|CDS|dipA	0	+	0
chromosome	5643662	5643675	PA0032_pwm	3.35366	-	8.92e-06	0.44	CTGGTATTGAGCAG	chromosome	5632926	5635874	PA5014|CDS|glnE	0	-	-7789
chromosome	3913198	3913211	PA0032_pwm	3.31707	+	8.99e-06	0.44	CTGGCCTACACCAC	chromosome	3913129	3913767	PA3495|CDS|nth	0	+	0
chromosome	3913198	3913211	PA0032_pwm	3.31707	-	8.99e-06	0.44	GTGGTGTAGGCCAG	chromosome	3894099	3895193	PA3481|CDS|-	0	-	-18006
chromosome	596065	596078	PA0032_pwm	3.02439	-	9.7e-06	0.448	CTGGTCCCGACCAC	chromosome	595245	596270	PA0536|CDS|-	0	-	0
chromosome	596065	596078	PA0032_pwm	3.02439	+	9.7e-06	0.448	GTGGTCGGGACCAG	chromosome	597708	598538	PA0539|CDS|-	0	+	-1631
chromosome	3659509	3659522	PA0032_pwm	3.02439	-	9.7e-06	0.448	CTGGTCGGGACCAC	chromosome	3659169	3659756	PA3270|CDS|-	0	-	0
chromosome	3659509	3659522	PA0032_pwm	3.02439	+	9.7e-06	0.448	GTGGTCCCGACCAG	chromosome	3660022	3663501	PA3271|CDS|-	0	+	-501
chromosome	5024168	5024181	PA0032_pwm	3.02439	-	9.7e-06	0.448	CTGGTCTGGACCGC	chromosome	5020402	5024952	PA4489|CDS|magD	0	-	0
chromosome	5024168	5024181	PA0032_pwm	3.02439	+	9.7e-06	0.448	GCGGTCCAGACCAG	chromosome	5030525	5031235	PA4495|CDS|-	0	+	-6345
chromosome	5666550	5666563	PA0032_pwm	3.02439	+	9.7e-06	0.448	CGGGTCTCGACCAC	chromosome	5680714	5680897	PA5045_promoter|antibiotic resistance	0	+	-14152
chromosome	5666550	5666563	PA0032_pwm	3.02439	+	9.7e-06	0.448	CGGGTCTCGACCAC	chromosome	5680714	5680897	PA5045_promoter|motility	0	+	-14152
chromosome	5666550	5666563	PA0032_pwm	3.02439	-	9.7e-06	0.448	GTGGTCGAGACCCG	chromosome	5666234	5667667	PA5035|CDS|gltD	0	-	0
chromosome	5871698	5871711	PA0032_pwm	3.02439	+	9.7e-06	0.448	CTGGGCTGGACCAC	chromosome	5876664	5877857	PA5219|CDS|-	0	+	-4954
chromosome	5871698	5871711	PA0032_pwm	3.02439	-	9.7e-06	0.448	GTGGTCCAGCCCAG	chromosome	5871667	5872749	PA5215|CDS|gcvT1	0	-	0
chromosome	5982284	5982297	PA0032_pwm	3.02439	+	9.7e-06	0.448	CTGGTCCAGACCGC	chromosome	5983820	5985154	PA5313|CDS|gabT2	0	+	-1524
chromosome	5982284	5982297	PA0032_pwm	3.02439	-	9.7e-06	0.448	GCGGTCTGGACCAG	chromosome	5982097	5983590	PA5312|CDS|pauC	0	-	0
chromosome	12870	12883	PA0032_pwm	2.92683	-	9.98e-06	0.448	CTGGTCTGGACCGA	chromosome	12488	13435	PA0009|CDS|glyQ	0	-	0
chromosome	12870	12883	PA0032_pwm	2.92683	+	9.98e-06	0.448	TCGGTCCAGACCAG	chromosome	13540	14091	PA0010|CDS|tag	0	+	-658
chromosome	1705901	1705914	PA0032_pwm	2.92683	-	9.98e-06	0.448	CTGGTCGAGACCCA	chromosome	1704793	1706103	PA1565|CDS|pauB2	0	-	0
chromosome	1705901	1705914	PA0032_pwm	2.92683	+	9.98e-06	0.448	TGGGTCTCGACCAG	chromosome	1711192	1711568	PA1570_promoter|siderophore	0	+	-5279
chromosome	5199043	5199056	PA0032_pwm	2.92683	-	9.98e-06	0.448	CTGGGCCAGACCAA	chromosome	5198334	5199359	PA4631|CDS|-	0	-	0
chromosome	5199043	5199056	PA0032_pwm	2.92683	+	9.98e-06	0.448	TTGGTCTGGCCCAG	chromosome	5200487	5202625	PA4633|CDS|-	0	+	-1432
chromosome	5775708	5775721	PA0032_pwm	2.92683	-	9.98e-06	0.448	CTGGTCTCGACCCA	chromosome	5775620	5776087	PA5126|CDS|-	0	-	0
chromosome	5775708	5775721	PA0032_pwm	2.92683	+	9.98e-06	0.448	TGGGTCGAGACCAG	chromosome	5776086	5776547	PA5127|CDS|-	0	+	-366
chromosome	708410	708422	PA0037_pwm	13.92	-	1.93e-07	1	GTGACCTGCTCAC	chromosome	706673	706943	PA0652_promoter|motility	0	-	-1468
chromosome	708410	708422	PA0037_pwm	13.92	-	1.93e-07	1	GTGACCTGCTCAC	chromosome	706673	706943	PA0652_promoter|QS	0	-	-1468
chromosome	708410	708422	PA0037_pwm	13.92	-	1.93e-07	1	GTGACCTGCTCAC	chromosome	706673	706943	PA0652_promoter|T3SS	0	-	-1468
chromosome	708410	708422	PA0037_pwm	13.9143	+	2.14e-07	1	GTGAGCAGGTCAC	chromosome	707686	708480	PA0654|CDS|speD	0	+	0
chromosome	1213389	1213401	PA0037_pwm	13.7029	-	3.38e-07	1	GTGAGTACCTCAC	chromosome	1213195	1214502	PA1120|CDS|tpbB	0	-	0
chromosome	1213389	1213401	PA0037_pwm	13.6914	+	3.76e-07	1	GTGAGGTACTCAC	chromosome	1215284	1215727	PA1122|CDS|-	0	+	-1884
chromosome	4762738	4762750	PA0037_pwm	13.4229	-	7.47e-07	1	GTGACCTGGTCAC	chromosome	4762659	4762925	PA4254|CDS|rpsQ	0	-	0
chromosome	4762738	4762750	PA0037_pwm	13.4171	+	7.57e-07	1	GTGACCAGGTCAC	chromosome	4781285	4781785	PA4272.1_promoter|QS	0	+	-18536
chromosome	461541	461553	PA0037_pwm	13.3771	+	7.91e-07	1	GTGAGCGCGTCAC	chromosome	454126	461544	PA0413|CDS|chpA	0	+	0
chromosome	461541	461553	PA0037_pwm	13.3771	+	7.91e-07	1	GTGAGCGCGTCAC	chromosome	454126	461544	PA0413|motility	0	+	0
chromosome	461541	461553	PA0037_pwm	13.3771	+	7.91e-07	1	GTGAGCGCGTCAC	chromosome	461537	462568	PA0414|CDS|chpB	0	+	0
chromosome	461541	461553	PA0037_pwm	13.3771	+	7.91e-07	1	GTGAGCGCGTCAC	chromosome	461537	462568	PA0414|motility	0	+	0
chromosome	461541	461553	PA0037_pwm	13.3657	-	8.09e-07	1	GTGACGCGCTCAC	chromosome	449385	449638	PA0407_promoter|T3SS	0	-	-11904
chromosome	461541	461553	PA0037_pwm	13.3657	-	8.09e-07	1	GTGACGCGCTCAC	chromosome	449385	449638	PA0407_promoter|T6SS	0	-	-11904
chromosome	1056752	1056764	PA0037_pwm	13.0914	-	1.25e-06	1	GTGATCTGCTCAC	chromosome	1047549	1048019	PA0962|CDS|dps	0	-	-8734
chromosome	1697207	1697219	PA0037_pwm	13.0914	-	1.25e-06	1	GTGATCTGCTCAC	chromosome	1694852	1696279	PA1557|CDS|ccoN2	0	-	-929
chromosome	1056752	1056764	PA0037_pwm	13.0514	+	1.42e-06	1	GTGAGCAGATCAC	chromosome	1056049	1057347	PA0972|CDS|tolB	0	+	0
chromosome	1697207	1697219	PA0037_pwm	13.0514	+	1.42e-06	1	GTGAGCAGATCAC	chromosome	1697188	1697919	PA1559|CDS|-	0	+	0
chromosome	3543912	3543924	PA0037_pwm	13.0343	+	1.43e-06	1	GTCAGCGGCTCAC	chromosome	3560621	3561955	PA3170|CDS|-	0	+	-16698
chromosome	3543912	3543924	PA0037_pwm	13.0229	-	1.44e-06	1	GTGAGCCGCTGAC	chromosome	3543764	3545074	PA3159|CDS|wbpA	0	-	0
chromosome	3549680	3549692	PA0037_pwm	13	+	1.55e-06	1	GTGACCCAGTCAC	chromosome	3560621	3561955	PA3170|CDS|-	0	+	-10930
chromosome	3549680	3549692	PA0037_pwm	12.9943	-	1.59e-06	1	GTGACTGGGTCAC	chromosome	3548110	3549789	PA3162|CDS|rpsA	0	-	0
chromosome	1450172	1450184	PA0037_pwm	12.6686	-	2.6e-06	1	GTCACCTGCTCAC	chromosome	1448548	1450449	PA1336|CDS|aauS	0	-	0
chromosome	1450172	1450184	PA0037_pwm	12.6457	+	2.75e-06	1	GTGAGCAGGTGAC	chromosome	1457175	1457633	PA1343|CDS|-	0	+	-6992
chromosome	4692117	4692129	PA0037_pwm	12.6114	+	2.89e-06	1	GTCAGGCGCTCAC	chromosome	4696281	4697903	PA4198|CDS|-	0	+	-4153
chromosome	4692117	4692129	PA0037_pwm	12.6057	-	2.9e-06	1	GTGAGCGCCTGAC	chromosome	4692126	4692956	PA4195|CDS|-	0	-	0
chromosome	4766971	4766983	PA0037_pwm	12.5943	+	2.93e-06	1	GTGATCTGGTCAC	chromosome	4781285	4781785	PA4272.1_promoter|QS	0	+	-14303
chromosome	991056	991068	PA0037_pwm	12.5829	-	2.98e-06	1	GTGACGTCGTCAC	chromosome	977420	977743	PA0894|CDS|-	0	-	-13314
chromosome	991056	991068	PA0037_pwm	12.5771	+	2.99e-06	1	GTGACGACGTCAC	chromosome	991013	991198	PA0905|biofilm	0	+	0
chromosome	991056	991068	PA0037_pwm	12.5771	+	2.99e-06	1	GTGACGACGTCAC	chromosome	991013	991198	PA0905|CDS|rsmA	0	+	0
chromosome	991056	991068	PA0037_pwm	12.5771	+	2.99e-06	1	GTGACGACGTCAC	chromosome	991013	991198	PA0905|motility	0	+	0
chromosome	991056	991068	PA0037_pwm	12.5771	+	2.99e-06	1	GTGACGACGTCAC	chromosome	991013	991198	PA0905|QS	0	+	0
chromosome	991056	991068	PA0037_pwm	12.5771	+	2.99e-06	1	GTGACGACGTCAC	chromosome	991013	991198	PA0905|T3SS	0	+	0
chromosome	991056	991068	PA0037_pwm	12.5771	+	2.99e-06	1	GTGACGACGTCAC	chromosome	991013	991198	PA0905|T6SS	0	+	0
chromosome	4766971	4766983	PA0037_pwm	12.5543	-	3.09e-06	1	GTGACCAGATCAC	chromosome	4766625	4767260	PA4263|CDS|rplC	0	-	0
chromosome	950649	950661	PA0037_pwm	12.3657	+	4.14e-06	1	GTGCGTTGCTCAC	chromosome	953691	955250	PA0873|CDS|phhR	0	+	-3031
chromosome	950649	950661	PA0037_pwm	12.3371	-	4.36e-06	1	GTGAGCAACGCAC	chromosome	949716	950648	PA0869|CDS|pbpG	0	-	-2
chromosome	4144720	4144732	PA0037_pwm	12.24	-	5.15e-06	1	GTGCGTCGCTCAC	chromosome	4143788	4144831	PA3702|biofilm	0	-	0
chromosome	4144720	4144732	PA0037_pwm	12.24	-	5.15e-06	1	GTGCGTCGCTCAC	chromosome	4143788	4144831	PA3702|CDS|wspR	0	-	0
chromosome	4144720	4144732	PA0037_pwm	12.2114	+	5.47e-06	1	GTGAGCGACGCAC	chromosome	4156184	4157089	PA3711|CDS|-	0	+	-11453
chromosome	5615042	5615054	PA0037_pwm	12.2	+	5.55e-06	1	GTCAGGCCCTCAC	chromosome	5615652	5616302	PA4998|CDS|-	0	+	-599
chromosome	694437	694449	PA0037_pwm	12.1943	+	5.57e-06	1	GTCAGGGCCTCAC	chromosome	694421	695023	PA0640|antibiotic resistance	0	+	0
chromosome	694437	694449	PA0037_pwm	12.1943	+	5.57e-06	1	GTCAGGGCCTCAC	chromosome	694421	695023	PA0640|CDS|-	0	+	0
chromosome	694437	694449	PA0037_pwm	12.1943	+	5.57e-06	1	GTCAGGGCCTCAC	chromosome	694421	695023	PA0640|siderophore	0	+	0
chromosome	694437	694449	PA0037_pwm	12.1829	-	5.66e-06	1	GTGAGGCCCTGAC	chromosome	673962	674418	PA0611_promoter|antibiotic resistance	0	-	-20020
chromosome	694437	694449	PA0037_pwm	12.1829	-	5.66e-06	1	GTGAGGCCCTGAC	chromosome	673962	674418	PA0611_promoter|ROS	0	-	-20020
chromosome	694437	694449	PA0037_pwm	12.1829	-	5.66e-06	1	GTGAGGCCCTGAC	chromosome	673962	674418	PA0611_promoter|T3SS	0	-	-20020
chromosome	5615042	5615054	PA0037_pwm	12.1771	-	5.68e-06	1	GTGAGGGCCTGAC	chromosome	5613733	5615544	PA4997|CDS|msbA	0	-	0
chromosome	2211944	2211956	PA0037_pwm	12.1657	-	5.78e-06	1	GTGCGCTGGTCAC	chromosome	2211322	2212512	PA2019|antibiotic resistance	0	-	0
chromosome	2211944	2211956	PA0037_pwm	12.1657	-	5.78e-06	1	GTGCGCTGGTCAC	chromosome	2211322	2212512	PA2019|CDS|mexX	0	-	0
chromosome	5342340	5342352	PA0037_pwm	12.1657	+	5.78e-06	1	GTGATCGAGTCAC	chromosome	5349929	5351605	PA4763|CDS|recN	0	+	-7578
chromosome	1905710	1905722	PA0037_pwm	12.16	-	5.81e-06	1	GTGCCCAGCTCAC	chromosome	1897290	1898651	PA1758|CDS|pabB	0	-	-7060
chromosome	1905710	1905722	PA0037_pwm	12.1429	+	5.88e-06	1	GTGAGCTGGGCAC	chromosome	1904995	1905756	PA1762|CDS|-	0	+	0
chromosome	2211944	2211956	PA0037_pwm	12.1371	+	5.92e-06	1	GTGACCAGCGCAC	chromosome	2212513	2212676	PA2020_promoter|antibiotic resistance	0	+	-558
chromosome	5342340	5342352	PA0037_pwm	12.1371	-	5.92e-06	1	GTGACTCGATCAC	chromosome	5339864	5343085	PA4756|CDS|carB	0	-	0
chromosome	912770	912782	PA0037_pwm	12.1257	-	6.08e-06	1	GTGATGCCCTCAC	chromosome	911595	912779	PA0836|CDS|ackA	0	-	0
chromosome	912770	912782	PA0037_pwm	12.0857	+	6.32e-06	1	GTGAGGGCATCAC	chromosome	912791	912861	PA0836.1|ncRNA|P5	0	+	-10
chromosome	2729710	2729722	PA0037_pwm	12.0343	+	6.71e-06	1	GTGCGCGGGTCAC	chromosome	2729571	2729840	PA2433|CDS|-	0	+	0
chromosome	4753248	4753260	PA0037_pwm	12.0343	+	6.71e-06	1	GTGCGCGGGTCAC	chromosome	4781285	4781785	PA4272.1_promoter|QS	0	+	-28026
chromosome	4773696	4773708	PA0037_pwm	12.0343	+	6.71e-06	1	GTGCCCGGCTCAC	chromosome	4781285	4781785	PA4272.1_promoter|QS	0	+	-7578
chromosome	2729710	2729722	PA0037_pwm	12.0171	-	6.87e-06	1	GTGACCCGCGCAC	chromosome	2725967	2728141	PA2431|CDS|-	0	-	-1570
chromosome	4753248	4753260	PA0037_pwm	12.0171	-	6.87e-06	1	GTGACCCGCGCAC	chromosome	4752260	4753708	PA4236|CDS|katA	0	-	0
chromosome	4753248	4753260	PA0037_pwm	12.0171	-	6.87e-06	1	GTGACCCGCGCAC	chromosome	4752260	4753708	PA4236|ROS	0	-	0
chromosome	4773696	4773708	PA0037_pwm	12.0171	-	6.87e-06	1	GTGAGCCGGGCAC	chromosome	4772279	4776478	PA4269|CDS|rpoC	0	-	0
chromosome	6026990	6027002	PA0037_pwm	11.96	-	7.35e-06	1	GTCAGTTCGTCAC	chromosome	6026219	6026674	PA5359|CDS|-	0	-	-317
chromosome	6026990	6027002	PA0037_pwm	11.92	+	7.94e-06	1	GTGACGAACTGAC	chromosome	6026779	6027468	PA5360|CDS|phoB	0	+	0
chromosome	6026990	6027002	PA0037_pwm	11.92	+	7.94e-06	1	GTGACGAACTGAC	chromosome	6026779	6027468	PA5360|QS	0	+	0
chromosome	3097901	3097913	PA0037_pwm	11.8971	-	8.13e-06	1	GTGAGCACTTCAC	chromosome	3096130	3098508	PA2735|CDS|-	0	-	0
chromosome	3097901	3097913	PA0037_pwm	11.8857	+	8.36e-06	1	GTGAAGTGCTCAC	chromosome	3108057	3108383	PA2746|CDS|-	0	+	-10145
chromosome	3647670	3647682	PA0037_pwm	11.84	-	8.91e-06	1	GTCATCTGCTCAC	chromosome	3647399	3647746	PA3259.1|CDS|-	0	-	0
chromosome	5206540	5206552	PA0037_pwm	11.8343	-	8.97e-06	1	GTCATCAGCTCAC	chromosome	5206209	5206487	PA4637|CDS|-	0	-	-54
chromosome	2997995	2998007	PA0037_pwm	11.8	+	9.58e-06	1	GTTACCCGCTCAC	chromosome	2997840	2998649	PA2650|CDS|-	0	+	0
chromosome	2997995	2998007	PA0037_pwm	11.7943	-	9.66e-06	1	GTGAGCGGGTAAC	chromosome	2965546	2966802	PA2623|CDS|icd	0	-	-31194
chromosome	5206540	5206552	PA0037_pwm	11.7886	+	9.7e-06	1	GTGAGCTGATGAC	chromosome	5208464	5209987	PA4640|CDS|mqoB	0	+	-1913
chromosome	3647670	3647682	PA0037_pwm	11.7829	+	9.73e-06	1	GTGAGCAGATGAC	chromosome	3648170	3648916	PA3261|CDS|-	0	+	-489
chromosome	6244606	6244618	PA0037_pwm	11.7771	+	9.77e-06	1	TTGAGCCGCTCAC	chromosome	6264161	6264361	PA0004_promoter|antibiotic resistance	0	+	-19544
chromosome	1976916	1976928	PA0037_pwm	11.7714	+	9.82e-06	1	GTGAGCGCTTCAC	chromosome	1974821	1977076	PA1818|antibiotic resistance	0	+	0
chromosome	1976916	1976928	PA0037_pwm	11.7714	+	9.82e-06	1	GTGAGCGCTTCAC	chromosome	1974821	1977076	PA1818|CDS|cadA	0	+	0
chromosome	1976916	1976928	PA0037_pwm	11.76	-	9.94e-06	1	GTGAAGCGCTCAC	chromosome	1974238	1974627	PA1817|CDS|-	0	-	-2290
chromosome	103862	103872	PA0048_pwm	10.3051	-	1.38e-07	0.0215	TGGCCTGGCCA	chromosome	99757	100123	PA0078_promoter|T6SS	0	-	-3740
chromosome	103862	103872	PA0048_pwm	10.3051	-	1.38e-07	0.0215	TGGCCTGGCCA	chromosome	99757	100123	PA0079_promoter|T6SS	0	-	-3740
chromosome	103862	103872	PA0048_pwm	10.3051	-	1.38e-07	0.0215	TGGCCTGGCCA	chromosome	99757	100123	PA0080_promoter|T6SS	0	-	-3740
chromosome	103862	103872	PA0048_pwm	10.3051	-	1.38e-07	0.0215	TGGCCTGGCCA	chromosome	99757	100123	PA0081_promoter|T6SS	0	-	-3740
chromosome	390818	390828	PA0048_pwm	10.3051	-	1.38e-07	0.0215	TGGCCTGGCCA	chromosome	389733	390884	PA0347|CDS|glpQ	0	-	0
chromosome	626340	626350	PA0048_pwm	10.3051	+	1.38e-07	0.0215	TGGCCTGGCCA	chromosome	639316	640341	PA0580|CDS|gcp	0	+	-12967
chromosome	1054324	1054334	PA0048_pwm	10.3051	+	1.38e-07	0.0215	TGGCCTGGCCA	chromosome	1053848	1054543	PA0969|CDS|tolQ	0	+	0
chromosome	1335384	1335394	PA0048_pwm	10.3051	-	1.38e-07	0.0215	TGGCCTGGCCA	chromosome	1334950	1335453	PA1234|CDS|-	0	-	0
chromosome	1505388	1505398	PA0048_pwm	10.3051	+	1.38e-07	0.0215	TGGCCTGGCCA	chromosome	1504605	1505729	PA1385|CDS|-	0	+	0
chromosome	1722596	1722606	PA0048_pwm	10.3051	-	1.38e-07	0.0215	TGGCCTGGCCA	chromosome	1719109	1720395	PA1580|CDS|gltA	0	-	-2202
chromosome	2198073	2198083	PA0048_pwm	10.3051	-	1.38e-07	0.0215	TGGCCTGGCCA	chromosome	2197432	2198730	PA2009|CDS|hmgA	0	-	0
chromosome	2406049	2406059	PA0048_pwm	10.3051	+	1.38e-07	0.0215	TGGCCTGGCCA	chromosome	2405993	2406877	PA2185|CDS|katN	0	+	0
chromosome	2406049	2406059	PA0048_pwm	10.3051	+	1.38e-07	0.0215	TGGCCTGGCCA	chromosome	2405993	2406877	PA2185|ROS	0	+	0
chromosome	2409947	2409957	PA0048_pwm	10.3051	-	1.38e-07	0.0215	TGGCCTGGCCA	chromosome	2407681	2408847	PA2188|CDS|-	0	-	-1101
chromosome	2412701	2412711	PA0048_pwm	10.3051	-	1.38e-07	0.0215	TGGCCTGGCCA	chromosome	2411481	2411708	PA2191_promoter|T3SS	0	-	-994
chromosome	2724598	2724608	PA0048_pwm	10.3051	-	1.38e-07	0.0215	TGGCCTGGCCA	chromosome	2723309	2724223	PA2428|CDS|-	0	-	-376
chromosome	2867452	2867462	PA0048_pwm	10.3051	-	1.38e-07	0.0215	TGGCCTGGCCA	chromosome	2866193	2867506	PA2539|CDS|-	0	-	0
chromosome	2876399	2876409	PA0048_pwm	10.3051	+	1.38e-07	0.0215	TGGCCTGGCCA	chromosome	2876555	2877367	PA2545|CDS|xthA	0	+	-147
chromosome	2887085	2887095	PA0048_pwm	10.3051	-	1.38e-07	0.0215	TGGCCTGGCCA	chromosome	2886570	2887337	PA2554|CDS|-	0	-	0
chromosome	2941686	2941696	PA0048_pwm	10.3051	-	1.38e-07	0.0215	TGGCCTGGCCA	chromosome	2940802	2941884	PA2598|CDS|-	0	-	0
chromosome	3111998	3112008	PA0048_pwm	10.3051	+	1.38e-07	0.0215	TGGCCTGGCCA	chromosome	3111633	3112151	PA2750|CDS|-	0	+	0
chromosome	3130094	3130104	PA0048_pwm	10.3051	-	1.38e-07	0.0215	TGGCCTGGCCA	chromosome	3128292	3129071	PA2770|CDS|-	0	-	-1024
chromosome	3277005	3277015	PA0048_pwm	10.3051	+	1.38e-07	0.0215	TGGCCTGGCCA	chromosome	3277409	3278578	PA2922|CDS|-	0	+	-395
chromosome	4259800	4259810	PA0048_pwm	10.3051	-	1.38e-07	0.0215	TGGCCTGGCCA	chromosome	4259255	4260397	PA3800|CDS|-	0	-	0
chromosome	5070170	5070180	PA0048_pwm	10.3051	+	1.38e-07	0.0215	TGGCCTGGCCA	chromosome	5069763	5071463	PA4526|CDS|pilB	0	+	0
chromosome	5070170	5070180	PA0048_pwm	10.3051	+	1.38e-07	0.0215	TGGCCTGGCCA	chromosome	5069763	5071463	PA4526|motility	0	+	0
chromosome	5560771	5560781	PA0048_pwm	10.3051	+	1.38e-07	0.0215	TGGCCTGGCCA	chromosome	5560013	5561524	PA4955|CDS|-	0	+	0
chromosome	5659626	5659636	PA0048_pwm	10.3051	-	1.38e-07	0.0215	TGGCCTGGCCA	chromosome	5659276	5660181	PA5029|CDS|-	0	-	0
chromosome	103862	103872	PA0048_pwm	10.2797	+	2.76e-07	0.0215	TGGCCAGGCCA	chromosome	103839	104005	PA0086_promoter|T6SS	0	+	0
chromosome	103862	103872	PA0048_pwm	10.2797	+	2.76e-07	0.0215	TGGCCAGGCCA	chromosome	103839	104005	PA0087_promoter|T6SS	0	+	0
chromosome	103862	103872	PA0048_pwm	10.2797	+	2.76e-07	0.0215	TGGCCAGGCCA	chromosome	103839	104005	PA0088_promoter|T6SS	0	+	0
chromosome	103862	103872	PA0048_pwm	10.2797	+	2.76e-07	0.0215	TGGCCAGGCCA	chromosome	103839	104005	PA0089_promoter|T6SS	0	+	0
chromosome	103862	103872	PA0048_pwm	10.2797	+	2.76e-07	0.0215	TGGCCAGGCCA	chromosome	103839	104005	PA0090_promoter|T6SS	0	+	0
chromosome	103862	103872	PA0048_pwm	10.2797	+	2.76e-07	0.0215	TGGCCAGGCCA	chromosome	103839	104005	PA0091_promoter|T6SS	0	+	0
chromosome	390818	390828	PA0048_pwm	10.2797	+	2.76e-07	0.0215	TGGCCAGGCCA	chromosome	391094	392188	PA0348|CDS|-	0	+	-267
chromosome	626340	626350	PA0048_pwm	10.2797	-	2.76e-07	0.0215	TGGCCAGGCCA	chromosome	624994	627765	PA0572|CDS|-	0	-	0
chromosome	626340	626350	PA0048_pwm	10.2797	-	2.76e-07	0.0215	TGGCCAGGCCA	chromosome	624994	627765	PA0572|T3SS	0	-	0
chromosome	1054324	1054334	PA0048_pwm	10.2797	-	2.76e-07	0.0215	TGGCCAGGCCA	chromosome	1047549	1048019	PA0962|CDS|dps	0	-	-6306
chromosome	1335384	1335394	PA0048_pwm	10.2797	+	2.76e-07	0.0215	TGGCCAGGCCA	chromosome	1335645	1336427	PA1235|CDS|-	0	+	-252
chromosome	1505388	1505398	PA0048_pwm	10.2797	-	2.76e-07	0.0215	TGGCCAGGCCA	chromosome	1496087	1496920	PA1379|CDS|-	0	-	-8469
chromosome	1722596	1722606	PA0048_pwm	10.2797	+	2.76e-07	0.0215	TGGCCAGGCCA	chromosome	1721496	1723268	PA1583|CDS|sdhA	0	+	0
chromosome	2198073	2198083	PA0048_pwm	10.2797	+	2.76e-07	0.0215	TGGCCAGGCCA	chromosome	2198731	2198890	PA2010_promoter|antibiotic resistance	0	+	-649
chromosome	2406049	2406059	PA0048_pwm	10.2797	-	2.76e-07	0.0215	TGGCCAGGCCA	chromosome	2405230	2405739	PA2184|CDS|-	0	-	-311
chromosome	2409947	2409957	PA0048_pwm	10.2797	+	2.76e-07	0.0215	TGGCCAGGCCA	chromosome	2409837	2410181	PA2190|CDS|-	0	+	0
chromosome	2412701	2412711	PA0048_pwm	10.2797	+	2.76e-07	0.0215	TGGCCAGGCCA	chromosome	2412546	2412860	PA2193|CDS|hcnA	0	+	0
chromosome	2724598	2724608	PA0048_pwm	10.2797	+	2.76e-07	0.0215	TGGCCAGGCCA	chromosome	2724485	2724730	PA2429|CDS|-	0	+	0
chromosome	2867452	2867462	PA0048_pwm	10.2797	+	2.76e-07	0.0215	TGGCCAGGCCA	chromosome	2876555	2877367	PA2545|CDS|xthA	0	+	-9094
chromosome	2876399	2876409	PA0048_pwm	10.2797	-	2.76e-07	0.0215	TGGCCAGGCCA	chromosome	2875697	2876410	PA2544|CDS|-	0	-	0
chromosome	2887085	2887095	PA0048_pwm	10.2797	+	2.76e-07	0.0215	TGGCCAGGCCA	chromosome	2892271	2892963	PA2558|CDS|-	0	+	-5177
chromosome	2941686	2941696	PA0048_pwm	10.2797	+	2.76e-07	0.0215	TGGCCAGGCCA	chromosome	2945264	2945869	PA2602|CDS|-	0	+	-3569
chromosome	3111998	3112008	PA0048_pwm	10.2797	-	2.76e-07	0.0215	TGGCCAGGCCA	chromosome	3109743	3110525	PA2748|CDS|-	0	-	-1474
chromosome	3130094	3130104	PA0048_pwm	10.2797	+	2.76e-07	0.0215	TGGCCAGGCCA	chromosome	3129729	3130754	PA2771|CDS|-	0	+	0
chromosome	3277005	3277015	PA0048_pwm	10.2797	-	2.76e-07	0.0215	TGGCCAGGCCA	chromosome	3276319	3277308	PA2921|CDS|-	0	-	0
chromosome	4259800	4259810	PA0048_pwm	10.2797	+	2.76e-07	0.0215	TGGCCAGGCCA	chromosome	4274351	4274501	PA3818_promoter|biofilm	0	+	-14542
chromosome	4259800	4259810	PA0048_pwm	10.2797	+	2.76e-07	0.0215	TGGCCAGGCCA	chromosome	4274351	4274501	PA3818_promoter|T3SS	0	+	-14542
chromosome	4259800	4259810	PA0048_pwm	10.2797	+	2.76e-07	0.0215	TGGCCAGGCCA	chromosome	4274351	4274501	PA3818_promoter|T6SS	0	+	-14542
chromosome	5070170	5070180	PA0048_pwm	10.2797	-	2.76e-07	0.0215	TGGCCAGGCCA	chromosome	5069532	5069762	PA4525_promoter|motility	0	-	-409
chromosome	5560771	5560781	PA0048_pwm	10.2797	-	2.76e-07	0.0215	TGGCCAGGCCA	chromosome	5559873	5560012	PA4953_promoter|motility	0	-	-760
chromosome	5560771	5560781	PA0048_pwm	10.2797	-	2.76e-07	0.0215	TGGCCAGGCCA	chromosome	5559873	5560012	PA4954_promoter|motility	0	-	-760
chromosome	5659626	5659636	PA0048_pwm	10.2797	+	2.76e-07	0.0215	TGGCCAGGCCA	chromosome	5660357	5661673	PA5030|CDS|-	0	+	-722
chromosome	83060	83070	PA0048_pwm	10.1271	-	3.9e-07	0.0215	CGGCCTGGCCA	chromosome	82404	83318	PA0070|CDS|tagQ1	0	-	0
chromosome	83060	83070	PA0048_pwm	10.1271	-	3.9e-07	0.0215	CGGCCTGGCCA	chromosome	82404	83318	PA0070|T6SS	0	-	0
chromosome	128796	128806	PA0048_pwm	10.1271	+	3.9e-07	0.0215	CGGCCTGGCCA	chromosome	128512	130104	PA0106|CDS|coxA	0	+	0
chromosome	157851	157861	PA0048_pwm	10.1271	+	3.9e-07	0.0215	CGGCCTGGCCA	chromosome	157108	158034	PA0138|CDS|-	0	+	0
chromosome	201764	201774	PA0048_pwm	10.1271	-	3.9e-07	0.0215	CGGCCTGGCCA	chromosome	201675	202160	PA0177|CDS|-	0	-	0
chromosome	313010	313020	PA0048_pwm	10.1271	-	3.9e-07	0.0215	CGGCCTGGCCA	chromosome	312381	313133	PA0278|CDS|-	0	-	0
chromosome	360505	360515	PA0048_pwm	10.1271	-	3.9e-07	0.0215	CGGCCTGGCCA	chromosome	360413	361447	PA0321|CDS|-	0	-	0
chromosome	375708	375718	PA0048_pwm	10.1271	+	3.9e-07	0.0215	CGGCCTGGCCA	chromosome	377893	378095	PA0336_promoter|antibiotic resistance	0	+	-2176
chromosome	375708	375718	PA0048_pwm	10.1271	+	3.9e-07	0.0215	CGGCCTGGCCA	chromosome	377893	378095	PA0337_promoter|antibiotic resistance	0	+	-2176
chromosome	375708	375718	PA0048_pwm	10.1271	+	3.9e-07	0.0215	CGGCCTGGCCA	chromosome	377893	378095	PA0338_promoter|antibiotic resistance	0	+	-2176
chromosome	376898	376908	PA0048_pwm	10.1271	-	3.9e-07	0.0215	CGGCCTGGCCA	chromosome	375951	377189	PA0334|antibiotic resistance	0	-	0
chromosome	376898	376908	PA0048_pwm	10.1271	-	3.9e-07	0.0215	CGGCCTGGCCA	chromosome	375951	377189	PA0334|CDS|-	0	-	0
chromosome	390257	390267	PA0048_pwm	10.1271	-	3.9e-07	0.0215	CGGCCTGGCCA	chromosome	389733	390884	PA0347|CDS|glpQ	0	-	0
chromosome	400391	400401	PA0048_pwm	10.1271	+	3.9e-07	0.0215	CGGCCTGGCCA	chromosome	400248	401072	PA0356|CDS|-	0	+	0
chromosome	465509	465519	PA0048_pwm	10.1271	-	3.9e-07	0.0215	CGGCCTGGCCA	chromosome	464568	465983	PA0418|CDS|-	0	-	0
chromosome	468607	468617	PA0048_pwm	10.1271	+	3.9e-07	0.0215	CGGCCTGGCCA	chromosome	468410	469900	PA0421|CDS|-	0	+	0
chromosome	520961	520971	PA0048_pwm	10.1271	+	3.9e-07	0.0215	CGGCCTGGCCA	chromosome	520737	521315	PA0460|CDS|-	0	+	0
chromosome	542847	542857	PA0048_pwm	10.1271	-	3.9e-07	0.0215	CGGCCTGGCCA	chromosome	542170	544347	PA0482|CDS|glcB	0	-	0
chromosome	550681	550691	PA0048_pwm	10.1271	-	3.9e-07	0.0215	CGGCCTGGCCA	chromosome	550520	550813	PA0490|CDS|-	0	-	0
chromosome	560951	560961	PA0048_pwm	10.1271	+	3.9e-07	0.0215	CGGCCTGGCCA	chromosome	560808	562013	PA0501|CDS|bioF	0	+	0
chromosome	565240	565250	PA0048_pwm	10.1271	+	3.9e-07	0.0215	CGGCCTGGCCA	chromosome	564914	566719	PA0506|CDS|-	0	+	0
chromosome	565240	565250	PA0048_pwm	10.1271	+	3.9e-07	0.0215	CGGCCTGGCCA	chromosome	564914	566719	PA0506|QS	0	+	0
chromosome	582808	582818	PA0048_pwm	10.1271	+	3.9e-07	0.0215	CGGCCTGGCCA	chromosome	582455	583855	PA0524|CDS|norB	0	+	0
chromosome	609777	609787	PA0048_pwm	10.1271	-	3.9e-07	0.0215	CGGCCTGGCCA	chromosome	609202	609999	PA0550|CDS|-	0	-	0
chromosome	703824	703834	PA0048_pwm	10.1271	+	3.9e-07	0.0215	CGGCCTGGCCA	chromosome	703477	704082	PA0649|CDS|trpG	0	+	0
chromosome	731623	731633	PA0048_pwm	10.1271	-	3.9e-07	0.0215	CGGCCTGGCCA	chromosome	730679	732094	PA0670|CDS|-	0	-	0
chromosome	827002	827012	PA0048_pwm	10.1271	-	3.9e-07	0.0215	CGGCCTGGCCA	chromosome	826463	827299	PA0758|CDS|-	0	-	0
chromosome	866136	866146	PA0048_pwm	10.1271	-	3.9e-07	0.0215	CGGCCTGGCCA	chromosome	865636	866451	PA0790|CDS|-	0	-	0
chromosome	989742	989752	PA0048_pwm	10.1271	+	3.9e-07	0.0215	CGGCCTGGCCA	chromosome	989590	990828	PA0904|CDS|lysC	0	+	0
chromosome	993459	993469	PA0048_pwm	10.1271	+	3.9e-07	0.0215	CGGCCTGGCCA	chromosome	993409	993783	PA0908|CDS|alpB	0	+	0
chromosome	1143902	1143912	PA0048_pwm	10.1271	+	3.9e-07	0.0215	CGGCCTGGCCA	chromosome	1142061	1144862	PA1054|CDS|shaA	0	+	0
chromosome	1186217	1186227	PA0048_pwm	10.1271	+	3.9e-07	0.0215	CGGCCTGGCCA	chromosome	1185060	1186484	PA1094|CDS|fliD	0	+	0
chromosome	1186217	1186227	PA0048_pwm	10.1271	+	3.9e-07	0.0215	CGGCCTGGCCA	chromosome	1185060	1186484	PA1094|motility	0	+	0
chromosome	1200473	1200483	PA0048_pwm	10.1271	-	3.9e-07	0.0215	CGGCCTGGCCA	chromosome	1200063	1201220	PA1108|CDS|-	0	-	0
chromosome	1400941	1400951	PA0048_pwm	10.1271	-	3.9e-07	0.0215	CGGCCTGGCCA	chromosome	1400711	1401190	PA1289|CDS|-	0	-	0
chromosome	1424288	1424298	PA0048_pwm	10.1271	+	3.9e-07	0.0215	CGGCCTGGCCA	chromosome	1423374	1424732	PA1313|CDS|-	0	+	0
chromosome	1426922	1426932	PA0048_pwm	10.1271	+	3.9e-07	0.0215	CGGCCTGGCCA	chromosome	1425912	1427453	PA1316|CDS|-	0	+	0
chromosome	1431325	1431335	PA0048_pwm	10.1271	+	3.9e-07	0.0215	CGGCCTGGCCA	chromosome	1431062	1431691	PA1319|CDS|cyoC	0	+	0
chromosome	1458226	1458236	PA0048_pwm	10.1271	+	3.9e-07	0.0215	CGGCCTGGCCA	chromosome	1457729	1458523	PA1344|CDS|-	0	+	0
chromosome	1584102	1584112	PA0048_pwm	10.1271	+	3.9e-07	0.0215	CGGCCTGGCCA	chromosome	1583956	1584798	PA1454|CDS|fleN	0	+	0
chromosome	1584102	1584112	PA0048_pwm	10.1271	+	3.9e-07	0.0215	CGGCCTGGCCA	chromosome	1583956	1584798	PA1454|motility	0	+	0
chromosome	1721888	1721898	PA0048_pwm	10.1271	-	3.9e-07	0.0215	CGGCCTGGCCA	chromosome	1719109	1720395	PA1580|CDS|gltA	0	-	-1494
chromosome	1730978	1730988	PA0048_pwm	10.1271	+	3.9e-07	0.0215	CGGCCTGGCCA	chromosome	1730181	1731347	PA1588|antibiotic resistance	0	+	0
chromosome	1730978	1730988	PA0048_pwm	10.1271	+	3.9e-07	0.0215	CGGCCTGGCCA	chromosome	1730181	1731347	PA1588|CDS|sucC	0	+	0
chromosome	1734588	1734598	PA0048_pwm	10.1271	+	3.9e-07	0.0215	CGGCCTGGCCA	chromosome	1734004	1734768	PA1591|CDS|-	0	+	0
chromosome	1749639	1749649	PA0048_pwm	10.1271	-	3.9e-07	0.0215	CGGCCTGGCCA	chromosome	1749349	1749789	PA1607|CDS|-	0	-	0
chromosome	1763909	1763919	PA0048_pwm	10.1271	+	3.9e-07	0.0215	CGGCCTGGCCA	chromosome	1763793	1764434	PA1620|CDS|-	0	+	0
chromosome	1772174	1772184	PA0048_pwm	10.1271	-	3.9e-07	0.0215	CGGCCTGGCCA	chromosome	1771122	1772651	PA1628|CDS|-	0	-	0
chromosome	1777511	1777521	PA0048_pwm	10.1271	+	3.9e-07	0.0215	CGGCCTGGCCA	chromosome	1776045	1777739	PA1633|CDS|kdpA	0	+	0
chromosome	1793246	1793256	PA0048_pwm	10.1271	-	3.9e-07	0.0215	CGGCCTGGCCA	chromosome	1793019	1794740	PA1647|CDS|-	0	-	0
chromosome	1793855	1793865	PA0048_pwm	10.1271	-	3.9e-07	0.0215	CGGCCTGGCCA	chromosome	1793019	1794740	PA1647|CDS|-	0	-	0
chromosome	1798110	1798120	PA0048_pwm	10.1271	-	3.9e-07	0.0215	CGGCCTGGCCA	chromosome	1797958	1799154	PA1651|CDS|-	0	-	0
chromosome	1880122	1880132	PA0048_pwm	10.1271	+	3.9e-07	0.0215	CGGCCTGGCCA	chromosome	1878980	1880185	PA1736|CDS|-	0	+	0
chromosome	1931088	1931098	PA0048_pwm	10.1271	-	3.9e-07	0.0215	CGGCCTGGCCA	chromosome	1930564	1931775	PA1783|CDS|nasA	0	-	0
chromosome	1938917	1938927	PA0048_pwm	10.1271	-	3.9e-07	0.0215	CGGCCTGGCCA	chromosome	1938549	1939412	PA1789|CDS|-	0	-	0
chromosome	1986126	1986136	PA0048_pwm	10.1271	+	3.9e-07	0.0215	CGGCCTGGCCA	chromosome	1986067	1986828	PA1827|CDS|-	0	+	0
chromosome	2116999	2117009	PA0048_pwm	10.1271	+	3.9e-07	0.0215	CGGCCTGGCCA	chromosome	2117897	2118097	PA1936|CDS|-	0	+	-889
chromosome	2197812	2197822	PA0048_pwm	10.1271	-	3.9e-07	0.0215	CGGCCTGGCCA	chromosome	2197432	2198730	PA2009|CDS|hmgA	0	-	0
chromosome	2350202	2350212	PA0048_pwm	10.1271	+	3.9e-07	0.0215	CGGCCTGGCCA	chromosome	2350089	2351453	PA2135|CDS|-	0	+	0
chromosome	2393453	2393463	PA0048_pwm	10.1271	+	3.9e-07	0.0215	CGGCCTGGCCA	chromosome	2393424	2393633	PA2170|CDS|-	0	+	0
chromosome	2408424	2408434	PA0048_pwm	10.1271	+	3.9e-07	0.0215	CGGCCTGGCCA	chromosome	2409107	2409661	PA2189|CDS|-	0	+	-674
chromosome	2434272	2434282	PA0048_pwm	10.1271	+	3.9e-07	0.0215	CGGCCTGGCCA	chromosome	2433748	2435070	PA2214|CDS|-	0	+	0
chromosome	2518489	2518499	PA0048_pwm	10.1271	-	3.9e-07	0.0215	CGGCCTGGCCA	chromosome	2516429	2518561	PA2289|CDS|-	0	-	0
chromosome	2579853	2579863	PA0048_pwm	10.1271	+	3.9e-07	0.0215	CGGCCTGGCCA	chromosome	2579542	2580882	PA2336|CDS|-	0	+	0
chromosome	2693012	2693022	PA0048_pwm	10.1271	+	3.9e-07	0.0215	CGGCCTGGCCA	chromosome	2692764	2693681	PA2410|CDS|fpvF	0	+	0
chromosome	2693012	2693022	PA0048_pwm	10.1271	+	3.9e-07	0.0215	CGGCCTGGCCA	chromosome	2692764	2693681	PA2410|siderophore	0	+	0
chromosome	2704077	2704087	PA0048_pwm	10.1271	-	3.9e-07	0.0215	CGGCCTGGCCA	chromosome	2700167	2701105	PA2417|CDS|-	0	-	-2973
chromosome	2781572	2781582	PA0048_pwm	10.1271	-	3.9e-07	0.0215	CGGCCTGGCCA	chromosome	2781498	2782646	PA2465|CDS|-	0	-	0
chromosome	2794910	2794920	PA0048_pwm	10.1271	-	3.9e-07	0.0215	CGGCCTGGCCA	chromosome	2794206	2794976	PA2476|CDS|dsbG	0	-	0
chromosome	2799626	2799636	PA0048_pwm	10.1271	+	3.9e-07	0.0215	CGGCCTGGCCA	chromosome	2798412	2799734	PA2480|CDS|-	0	+	0
chromosome	2859219	2859229	PA0048_pwm	10.1271	+	3.9e-07	0.0215	CGGCCTGGCCA	chromosome	2858503	2859627	PA2531|CDS|-	0	+	0
chromosome	2859219	2859229	PA0048_pwm	10.1271	+	3.9e-07	0.0215	CGGCCTGGCCA	chromosome	2858503	2859627	PA2531|siderophore	0	+	0
chromosome	2870197	2870207	PA0048_pwm	10.1271	-	3.9e-07	0.0215	CGGCCTGGCCA	chromosome	2870162	2873827	PA2542|CDS|-	0	-	0
chromosome	2888412	2888422	PA0048_pwm	10.1271	-	3.9e-07	0.0215	CGGCCTGGCCA	chromosome	2887357	2889024	PA2555|CDS|-	0	-	0
chromosome	2903822	2903832	PA0048_pwm	10.1271	+	3.9e-07	0.0215	CGGCCTGGCCA	chromosome	2902218	2903981	PA2567|antibiotic resistance	0	+	0
chromosome	2903822	2903832	PA0048_pwm	10.1271	+	3.9e-07	0.0215	CGGCCTGGCCA	chromosome	2902218	2903981	PA2567|CDS|-	0	+	0
chromosome	2960893	2960903	PA0048_pwm	10.1271	+	3.9e-07	0.0215	CGGCCTGGCCA	chromosome	2960456	2961136	PA2617|CDS|aat	0	+	0
chromosome	2987241	2987251	PA0048_pwm	10.1271	+	3.9e-07	0.0215	CGGCCTGGCCA	chromosome	2986243	2987589	PA2641|CDS|nuoF	0	+	0
chromosome	3066325	3066335	PA0048_pwm	10.1271	+	3.9e-07	0.0215	CGGCCTGGCCA	chromosome	3066296	3067159	PA2712|CDS|-	0	+	0
chromosome	3114293	3114303	PA0048_pwm	10.1271	-	3.9e-07	0.0215	CGGCCTGGCCA	chromosome	3114240	3114683	PA2752|CDS|-	0	-	0
chromosome	3178966	3178976	PA0048_pwm	10.1271	-	3.9e-07	0.0215	CGGCCTGGCCA	chromosome	3176117	3177007	PA2823|CDS|-	0	-	-1960
chromosome	3214308	3214318	PA0048_pwm	10.1271	+	3.9e-07	0.0215	CGGCCTGGCCA	chromosome	3214282	3215217	PA2862|CDS|lipA	0	+	0
chromosome	3214308	3214318	PA0048_pwm	10.1271	+	3.9e-07	0.0215	CGGCCTGGCCA	chromosome	3214282	3215217	PA2862|T6SS	0	+	0
chromosome	3216836	3216846	PA0048_pwm	10.1271	-	3.9e-07	0.0215	CGGCCTGGCCA	chromosome	3216456	3216890	PA2864|antibiotic resistance	0	-	0
chromosome	3216836	3216846	PA0048_pwm	10.1271	-	3.9e-07	0.0215	CGGCCTGGCCA	chromosome	3216456	3216890	PA2864|CDS|-	0	-	0
chromosome	3264782	3264792	PA0048_pwm	10.1271	-	3.9e-07	0.0215	CGGCCTGGCCA	chromosome	3264642	3265211	PA2910|CDS|-	0	-	0
chromosome	3265031	3265041	PA0048_pwm	10.1271	+	3.9e-07	0.0215	CGGCCTGGCCA	chromosome	3265848	3268004	PA2911|CDS|-	0	+	-808
chromosome	3338183	3338193	PA0048_pwm	10.1271	-	3.9e-07	0.0215	CGGCCTGGCCA	chromosome	3337692	3338456	PA2979|CDS|kdsB	0	-	0
chromosome	3378178	3378188	PA0048_pwm	10.1271	-	3.9e-07	0.0215	CGGCCTGGCCA	chromosome	3377870	3378304	PA3016|CDS|-	0	-	0
chromosome	3413158	3413168	PA0048_pwm	10.1271	+	3.9e-07	0.0215	CGGCCTGGCCA	chromosome	3414401	3414613	PA3049|CDS|rmf	0	+	-1234
chromosome	3413163	3413173	PA0048_pwm	10.1271	-	3.9e-07	0.0215	CGGCCTGGCCA	chromosome	3411763	3413940	PA3048|CDS|-	0	-	0
chromosome	3426715	3426725	PA0048_pwm	10.1271	-	3.9e-07	0.0215	CGGCCTGGCCA	chromosome	3425555	3426922	PA3061|biofilm	0	-	0
chromosome	3426715	3426725	PA0048_pwm	10.1271	-	3.9e-07	0.0215	CGGCCTGGCCA	chromosome	3425555	3426922	PA3061|CDS|pelD	0	-	0
chromosome	3476694	3476704	PA0048_pwm	10.1271	+	3.9e-07	0.0215	CGGCCTGGCCA	chromosome	3483642	3484349	PA3104|CDS|xcpP	0	+	-6939
chromosome	3578941	3578951	PA0048_pwm	10.1271	-	3.9e-07	0.0215	CGGCCTGGCCA	chromosome	3578513	3579358	PA3188|CDS|-	0	-	0
chromosome	3653275	3653285	PA0048_pwm	10.1271	+	3.9e-07	0.0215	CGGCCTGGCCA	chromosome	3653138	3653452	PA3265|antibiotic resistance	0	+	0
chromosome	3653275	3653285	PA0048_pwm	10.1271	+	3.9e-07	0.0215	CGGCCTGGCCA	chromosome	3653138	3653452	PA3265|CDS|-	0	+	0
chromosome	3743041	3743051	PA0048_pwm	10.1271	+	3.9e-07	0.0215	CGGCCTGGCCA	chromosome	3742694	3743686	PA3333|CDS|fabH2	0	+	0
chromosome	3831680	3831690	PA0048_pwm	10.1271	-	3.9e-07	0.0215	CGGCCTGGCCA	chromosome	3830898	3832655	PA3422|CDS|-	0	-	0
chromosome	3835824	3835834	PA0048_pwm	10.1271	-	3.9e-07	0.0215	CGGCCTGGCCA	chromosome	3835579	3836349	PA3426|CDS|-	0	-	0
chromosome	3860477	3860487	PA0048_pwm	10.1271	-	3.9e-07	0.0215	CGGCCTGGCCA	chromosome	3859338	3860522	PA3454|CDS|-	0	-	0
chromosome	3866100	3866110	PA0048_pwm	10.1271	+	3.9e-07	0.0215	CGGCCTGGCCA	chromosome	3865897	3867666	PA3459|CDS|-	0	+	0
chromosome	3869380	3869390	PA0048_pwm	10.1271	+	3.9e-07	0.0215	CGGCCTGGCCA	chromosome	3867707	3869464	PA3460|CDS|-	0	+	0
chromosome	3880641	3880651	PA0048_pwm	10.1271	+	3.9e-07	0.0215	CGGCCTGGCCA	chromosome	3879559	3880926	PA3467|CDS|-	0	+	0
chromosome	3924487	3924497	PA0048_pwm	10.1271	-	3.9e-07	0.0215	CGGCCTGGCCA	chromosome	3923759	3924556	PA3507|CDS|-	0	-	0
chromosome	3965657	3965667	PA0048_pwm	10.1271	+	3.9e-07	0.0215	CGGCCTGGCCA	chromosome	3964275	3965759	PA3541|biofilm	0	+	0
chromosome	3965657	3965667	PA0048_pwm	10.1271	+	3.9e-07	0.0215	CGGCCTGGCCA	chromosome	3964275	3965759	PA3541|CDS|alg8	0	+	0
chromosome	4101195	4101205	PA0048_pwm	10.1271	-	3.9e-07	0.0215	CGGCCTGGCCA	chromosome	4100104	4101849	PA3660|CDS|-	0	-	0
chromosome	4116112	4116122	PA0048_pwm	10.1271	+	3.9e-07	0.0215	CGGCCTGGCCA	chromosome	4115468	4116148	PA3675|CDS|-	0	+	0
chromosome	4142547	4142557	PA0048_pwm	10.1271	+	3.9e-07	0.0215	CGGCCTGGCCA	chromosome	4156184	4157089	PA3711|CDS|-	0	+	-13628
chromosome	4148650	4148660	PA0048_pwm	10.1271	-	3.9e-07	0.0215	CGGCCTGGCCA	chromosome	4148249	4148938	PA3705|CDS|wspD	0	-	0
chromosome	4185818	4185828	PA0048_pwm	10.1271	+	3.9e-07	0.0215	CGGCCTGGCCA	chromosome	4185522	4186727	PA3734|CDS|-	0	+	0
chromosome	4188118	4188128	PA0048_pwm	10.1271	-	3.9e-07	0.0215	CGGCCTGGCCA	chromosome	4186781	4188190	PA3735|CDS|thrC	0	-	0
chromosome	4211164	4211174	PA0048_pwm	10.1271	+	3.9e-07	0.0215	CGGCCTGGCCA	chromosome	4210295	4212823	PA3760|CDS|-	0	+	0
chromosome	4232605	4232615	PA0048_pwm	10.1271	+	3.9e-07	0.0215	CGGCCTGGCCA	chromosome	4232258	4233400	PA3774|CDS|-	0	+	0
chromosome	4279880	4279890	PA0048_pwm	10.1271	-	3.9e-07	0.0215	CGGCCTGGCCA	chromosome	4279389	4280507	PA3823|CDS|tgt	0	-	0
chromosome	4390574	4390584	PA0048_pwm	10.1271	+	3.9e-07	0.0215	CGGCCTGGCCA	chromosome	4389231	4391609	PA3920|CDS|copA1	0	+	0
chromosome	4396493	4396503	PA0048_pwm	10.1271	-	3.9e-07	0.0215	CGGCCTGGCCA	chromosome	4396122	4398047	PA3923|CDS|-	0	-	0
chromosome	4587085	4587095	PA0048_pwm	10.1271	+	3.9e-07	0.0215	CGGCCTGGCCA	chromosome	4585886	4587190	PA4102|biofilm	0	+	0
chromosome	4587085	4587095	PA0048_pwm	10.1271	+	3.9e-07	0.0215	CGGCCTGGCCA	chromosome	4585886	4587190	PA4102|CDS|bfmS	0	+	0
chromosome	4587085	4587095	PA0048_pwm	10.1271	+	3.9e-07	0.0215	CGGCCTGGCCA	chromosome	4585886	4587190	PA4102|QS	0	+	0
chromosome	4722774	4722784	PA0048_pwm	10.1271	-	3.9e-07	0.0215	CGGCCTGGCCA	chromosome	4721614	4722858	PA4218|CDS|ampP	0	-	0
chromosome	4748374	4748384	PA0048_pwm	10.1271	-	3.9e-07	0.0215	CGGCCTGGCCA	chromosome	4747154	4748542	PA4233|CDS|-	0	-	0
chromosome	4815435	4815445	PA0048_pwm	10.1271	+	3.9e-07	0.0215	CGGCCTGGCCA	chromosome	4815043	4816512	PA4292|CDS|-	0	+	0
chromosome	4816861	4816871	PA0048_pwm	10.1271	-	3.9e-07	0.0215	CGGCCTGGCCA	chromosome	4816580	4819348	PA4293|CDS|pprA	0	-	0
chromosome	4882919	4882929	PA0048_pwm	10.1271	+	3.9e-07	0.0215	CGGCCTGGCCA	chromosome	4882404	4883570	PA4355|CDS|pyeM	0	+	0
chromosome	4891734	4891744	PA0048_pwm	10.1271	-	3.9e-07	0.0215	CGGCCTGGCCA	chromosome	4891345	4892247	PA4363|CDS|iciA	0	-	0
chromosome	4892915	4892925	PA0048_pwm	10.1271	+	3.9e-07	0.0215	CGGCCTGGCCA	chromosome	4892748	4893350	PA4365|CDS|lysE	0	+	0
chromosome	4903813	4903823	PA0048_pwm	10.1271	+	3.9e-07	0.0215	CGGCCTGGCCA	chromosome	4903466	4904596	PA4374|antibiotic resistance	0	+	0
chromosome	4903813	4903823	PA0048_pwm	10.1271	+	3.9e-07	0.0215	CGGCCTGGCCA	chromosome	4903466	4904596	PA4374|CDS|mexV	0	+	0
chromosome	4907651	4907661	PA0048_pwm	10.1271	-	3.9e-07	0.0215	CGGCCTGGCCA	chromosome	4897427	4897999	PA4369|CDS|-	0	-	-9653
chromosome	4924780	4924790	PA0048_pwm	10.1271	-	3.9e-07	0.0215	CGGCCTGGCCA	chromosome	4924247	4925083	PA4394|CDS|-	0	-	0
chromosome	5043042	5043052	PA0048_pwm	10.1271	+	3.9e-07	0.0215	CGGCCTGGCCA	chromosome	5042068	5043078	PA4503|CDS|dppB	0	+	0
chromosome	5052002	5052012	PA0048_pwm	10.1271	+	3.9e-07	0.0215	CGGCCTGGCCA	chromosome	5056095	5056775	PA4515|CDS|-	0	+	-4084
chromosome	5142253	5142263	PA0048_pwm	10.1271	-	3.9e-07	0.0215	CGGCCTGGCCA	chromosome	5141786	5143063	PA4591|CDS|-	0	-	0
chromosome	5160276	5160286	PA0048_pwm	10.1271	+	3.9e-07	0.0215	CGGCCTGGCCA	chromosome	5156368	5160615	PA4601|biofilm	0	+	0
chromosome	5160276	5160286	PA0048_pwm	10.1271	+	3.9e-07	0.0215	CGGCCTGGCCA	chromosome	5156368	5160615	PA4601|CDS|morA	0	+	0
chromosome	5160276	5160286	PA0048_pwm	10.1271	+	3.9e-07	0.0215	CGGCCTGGCCA	chromosome	5156368	5160615	PA4601|motility	0	+	0
chromosome	5200723	5200733	PA0048_pwm	10.1271	+	3.9e-07	0.0215	CGGCCTGGCCA	chromosome	5200487	5202625	PA4633|CDS|-	0	+	0
chromosome	5214277	5214287	PA0048_pwm	10.1271	+	3.9e-07	0.0215	CGGCCTGGCCA	chromosome	5213474	5214757	PA4647|CDS|uraA	0	+	0
chromosome	5222546	5222556	PA0048_pwm	10.1271	+	3.9e-07	0.0215	CGGCCTGGCCA	chromosome	5224890	5225873	PA4657|CDS|-	0	+	-2335
chromosome	5230215	5230225	PA0048_pwm	10.1271	+	3.9e-07	0.0215	CGGCCTGGCCA	chromosome	5234854	5234996	PA4667_promoter|antibiotic resistance	0	+	-4630
chromosome	5245022	5245032	PA0048_pwm	10.1271	+	3.9e-07	0.0215	CGGCCTGGCCA	chromosome	5243178	5245406	PA4675|CDS|chtA	0	+	0
chromosome	5245022	5245032	PA0048_pwm	10.1271	+	3.9e-07	0.0215	CGGCCTGGCCA	chromosome	5243178	5245406	PA4675|siderophore	0	+	0
chromosome	5271808	5271818	PA0048_pwm	10.1271	-	3.9e-07	0.0215	CGGCCTGGCCA	chromosome	5271485	5272300	PA4693|CDS|pssA	0	-	0
chromosome	5279431	5279441	PA0048_pwm	10.1271	-	3.9e-07	0.0215	CGGCCTGGCCA	chromosome	5277968	5280292	PA4700|CDS|mrcB	0	-	0
chromosome	5318236	5318246	PA0048_pwm	10.1271	-	3.9e-07	0.0215	CGGCCTGGCCA	chromosome	5308743	5308964	PA4726.2|ncRNA|P30	0	-	-9273
chromosome	5413243	5413253	PA0048_pwm	10.1271	-	3.9e-07	0.0215	CGGCCTGGCCA	chromosome	5412569	5414236	PA4822|CDS|-	0	-	0
chromosome	5420856	5420866	PA0048_pwm	10.1271	-	3.9e-07	0.0215	CGGCCTGGCCA	chromosome	5420323	5421726	PA4829|CDS|lpd3	0	-	0
chromosome	5471415	5471425	PA0048_pwm	10.1271	+	3.9e-07	0.0215	CGGCCTGGCCA	chromosome	5470186	5471451	PA4873|CDS|-	0	+	0
chromosome	5482350	5482360	PA0048_pwm	10.1271	+	3.9e-07	0.0215	CGGCCTGGCCA	chromosome	5481070	5482461	PA4886|CDS|-	0	+	0
chromosome	5507808	5507818	PA0048_pwm	10.1271	-	3.9e-07	0.0215	CGGCCTGGCCA	chromosome	5506966	5507898	PA4908|CDS|-	0	-	0
chromosome	5520286	5520296	PA0048_pwm	10.1271	+	3.9e-07	0.0215	CGGCCTGGCCA	chromosome	5519711	5520538	PA4920|CDS|nadE	0	+	0
chromosome	5524398	5524408	PA0048_pwm	10.1271	-	3.9e-07	0.0215	CGGCCTGGCCA	chromosome	5523868	5524719	PA4925|CDS|-	0	-	0
chromosome	5597090	5597100	PA0048_pwm	10.1271	-	3.9e-07	0.0215	CGGCCTGGCCA	chromosome	5595279	5598275	PA4982|CDS|-	0	-	0
chromosome	5642440	5642450	PA0048_pwm	10.1271	+	3.9e-07	0.0215	CGGCCTGGCCA	chromosome	5641010	5643709	PA5017|CDS|dipA	0	+	0
chromosome	5642785	5642795	PA0048_pwm	10.1271	+	3.9e-07	0.0215	CGGCCTGGCCA	chromosome	5641010	5643709	PA5017|CDS|dipA	0	+	0
chromosome	5691857	5691867	PA0048_pwm	10.1271	+	3.9e-07	0.0215	CGGCCTGGCCA	chromosome	5691762	5692457	PA5052|CDS|-	0	+	0
chromosome	5697431	5697441	PA0048_pwm	10.1271	+	3.9e-07	0.0215	CGGCCTGGCCA	chromosome	5697198	5698055	PA5057|CDS|phaD	0	+	0
chromosome	5723469	5723479	PA0048_pwm	10.1271	-	3.9e-07	0.0215	CGGCCTGGCCA	chromosome	5722267	5723517	PA5084|CDS|dguA	0	-	0
chromosome	5761874	5761884	PA0048_pwm	10.1271	-	3.9e-07	0.0215	CGGCCTGGCCA	chromosome	5761482	5762066	PA5115|CDS|-	0	-	0
chromosome	5769032	5769042	PA0048_pwm	10.1271	-	3.9e-07	0.0215	CGGCCTGGCCA	chromosome	5768442	5770649	PA5121|CDS|-	0	-	0
chromosome	5773257	5773267	PA0048_pwm	10.1271	+	3.9e-07	0.0215	CGGCCTGGCCA	chromosome	5772298	5773374	PA5124|CDS|ntrB	0	+	0
chromosome	5809561	5809571	PA0048_pwm	10.1271	+	3.9e-07	0.0215	CGGCCTGGCCA	chromosome	5808368	5809897	PA5160|antibiotic resistance	0	+	0
chromosome	5809561	5809571	PA0048_pwm	10.1271	+	3.9e-07	0.0215	CGGCCTGGCCA	chromosome	5808368	5809897	PA5160|CDS|-	0	+	0
chromosome	5815415	5815425	PA0048_pwm	10.1271	+	3.9e-07	0.0215	CGGCCTGGCCA	chromosome	5813727	5815565	PA5165|CDS|dctB	0	+	0
chromosome	5966160	5966170	PA0048_pwm	10.1271	+	3.9e-07	0.0215	CGGCCTGGCCA	chromosome	5964859	5966577	PA5297|CDS|poxB	0	+	0
chromosome	6018592	6018602	PA0048_pwm	10.1271	-	3.9e-07	0.0215	CGGCCTGGCCA	chromosome	6017624	6018778	PA5349|CDS|rubB	0	-	0
chromosome	6028732	6028742	PA0048_pwm	10.1271	+	3.9e-07	0.0215	CGGCCTGGCCA	chromosome	6027542	6028873	PA5361|CDS|phoR	0	+	0
chromosome	6054656	6054666	PA0048_pwm	10.1271	-	3.9e-07	0.0215	CGGCCTGGCCA	chromosome	6054594	6055433	PA5377|CDS|cbcW	0	-	0
chromosome	6076038	6076048	PA0048_pwm	10.1271	+	3.9e-07	0.0215	CGGCCTGGCCA	chromosome	6075880	6077940	PA5398|CDS|dgcA	0	+	0
chromosome	6095491	6095501	PA0048_pwm	10.1271	+	3.9e-07	0.0215	CGGCCTGGCCA	chromosome	6095363	6096613	PA5416|CDS|soxB	0	+	0
chromosome	6129306	6129316	PA0048_pwm	10.1271	-	3.9e-07	0.0215	CGGCCTGGCCA	chromosome	6128056	6130911	PA5442|CDS|-	0	-	0
chromosome	6184248	6184258	PA0048_pwm	10.1271	-	3.9e-07	0.0215	CGGCCTGGCCA	chromosome	6183784	6186525	PA5493|CDS|polA	0	-	0
chromosome	6211450	6211460	PA0048_pwm	10.1271	-	3.9e-07	0.0215	CGGCCTGGCCA	chromosome	6210065	6211768	PA5518|CDS|-	0	-	0
chromosome	60880	60890	PA0048_pwm	10.1017	+	6.71e-07	0.0268	CGGCCAGGCCA	chromosome	60656	61342	PA0045|CDS|-	0	+	0
chromosome	122667	122677	PA0048_pwm	10.1017	-	6.71e-07	0.0268	CGGCCAGGCCA	chromosome	115046	115298	PA0093_promoter|T6SS	0	-	-7370
chromosome	166833	166843	PA0048_pwm	10.1017	-	6.71e-07	0.0268	CGGCCAGGCCA	chromosome	165219	165737	PA0145|CDS|-	0	-	-1097
chromosome	331282	331292	PA0048_pwm	10.1017	-	6.71e-07	0.0268	CGGCCAGGCCA	chromosome	331034	331699	PA0294|CDS|aguR	0	-	0
chromosome	472566	472576	PA0048_pwm	10.1017	+	6.71e-07	0.0268	CGGCCAGGCCA	chromosome	472024	473175	PA0425|antibiotic resistance	0	+	0
chromosome	472566	472576	PA0048_pwm	10.1017	+	6.71e-07	0.0268	CGGCCAGGCCA	chromosome	472024	473175	PA0425|CDS|mexA	0	+	0
chromosome	565264	565274	PA0048_pwm	10.1017	+	6.71e-07	0.0268	CGGCCAGGCCA	chromosome	564914	566719	PA0506|CDS|-	0	+	0
chromosome	565264	565274	PA0048_pwm	10.1017	+	6.71e-07	0.0268	CGGCCAGGCCA	chromosome	564914	566719	PA0506|QS	0	+	0
chromosome	581858	581868	PA0048_pwm	10.1017	-	6.71e-07	0.0268	CGGCCAGGCCA	chromosome	578394	580100	PA0519|CDS|nirS	0	-	-1759
chromosome	603263	603273	PA0048_pwm	10.1017	-	6.71e-07	0.0268	CGGCCAGGCCA	chromosome	601398	602141	PA0544|CDS|-	0	-	-1123
chromosome	1075875	1075885	PA0048_pwm	10.1017	-	6.71e-07	0.0268	CGGCCAGGCCA	chromosome	1071239	1071877	PA0990|CDS|-	0	-	-3999
chromosome	1109431	1109441	PA0048_pwm	10.1017	+	6.71e-07	0.0268	CGGCCAGGCCA	chromosome	1108949	1109866	PA1023|CDS|-	0	+	0
chromosome	1198863	1198873	PA0048_pwm	10.1017	-	6.71e-07	0.0268	CGGCCAGGCCA	chromosome	1198750	1199946	PA1107|CDS|roeA	0	-	0
chromosome	1257415	1257425	PA0048_pwm	10.1017	-	6.71e-07	0.0268	CGGCCAGGCCA	chromosome	1251418	1254309	PA1156|CDS|nrdA	0	-	-3107
chromosome	1343830	1343840	PA0048_pwm	10.1017	+	6.71e-07	0.0268	TGGCCTGACCA	chromosome	1343453	1345225	PA1242|CDS|sprP	0	+	0
chromosome	1392364	1392374	PA0048_pwm	10.1017	+	6.71e-07	0.0268	CGGCCAGGCCA	chromosome	1391864	1392601	PA1281|CDS|cobV	0	+	0
chromosome	1402464	1402474	PA0048_pwm	10.1017	-	6.71e-07	0.0268	TGGCCTGACCA	chromosome	1401412	1402005	PA1290|CDS|-	0	-	-460
chromosome	1413195	1413205	PA0048_pwm	10.1017	+	6.71e-07	0.0268	CGGCCAGGCCA	chromosome	1411585	1414140	PA1302|CDS|-	0	+	0
chromosome	1413195	1413205	PA0048_pwm	10.1017	+	6.71e-07	0.0268	CGGCCAGGCCA	chromosome	1411585	1414140	PA1302|siderophore	0	+	0
chromosome	1423715	1423725	PA0048_pwm	10.1017	+	6.71e-07	0.0268	CGGCCAGGCCA	chromosome	1423374	1424732	PA1313|CDS|-	0	+	0
chromosome	1449012	1449022	PA0048_pwm	10.1017	-	6.71e-07	0.0268	CGGCCAGGCCA	chromosome	1448548	1450449	PA1336|CDS|aauS	0	-	0
chromosome	1454296	1454306	PA0048_pwm	10.1017	-	6.71e-07	0.0268	CGGCCAGGCCA	chromosome	1454201	1454869	PA1340|CDS|aatM	0	-	0
chromosome	1570786	1570796	PA0048_pwm	10.1017	+	6.71e-07	0.0268	CGGCCAGGCCA	chromosome	1570496	1571779	PA1441|CDS|-	0	+	0
chromosome	1570786	1570796	PA0048_pwm	10.1017	+	6.71e-07	0.0268	CGGCCAGGCCA	chromosome	1570496	1571779	PA1441|motility	0	+	0
chromosome	1624085	1624095	PA0048_pwm	10.1017	-	6.71e-07	0.0268	CGGCCAGGCCA	chromosome	1623864	1624715	PA1496|CDS|-	0	-	0
chromosome	1677747	1677757	PA0048_pwm	10.1017	+	6.71e-07	0.0268	TGGCCTGACCA	chromosome	1677559	1678407	PA1539|CDS|-	0	+	0
chromosome	1735009	1735019	PA0048_pwm	10.1017	+	6.71e-07	0.0268	CGGCCAGGCCA	chromosome	1735236	1735709	PA1593|CDS|-	0	+	-218
chromosome	1752378	1752388	PA0048_pwm	10.1017	-	6.71e-07	0.0268	CGGCCAGGCCA	chromosome	1751674	1752891	PA1609|CDS|fabB	0	-	0
chromosome	1799677	1799687	PA0048_pwm	10.1017	-	6.71e-07	0.0268	CGGCCAGGCCA	chromosome	1797958	1799154	PA1651|CDS|-	0	-	-524
chromosome	1887937	1887947	PA0048_pwm	10.1017	-	6.71e-07	0.0268	CGGCCAGGCCA	chromosome	1887698	1888186	PA1745|CDS|-	0	-	0
chromosome	2041006	2041016	PA0048_pwm	10.1017	+	6.71e-07	0.0268	CGGCCAGGCCA	chromosome	2036441	2043847	PA1874|CDS|-	0	+	0
chromosome	2146271	2146281	PA0048_pwm	10.1017	-	6.71e-07	0.0268	CGGCCAGGCCA	chromosome	2144810	2145745	PA1961|CDS|-	0	-	-527
chromosome	2180448	2180458	PA0048_pwm	10.1017	+	6.71e-07	0.0268	CGGCCAGGCCA	chromosome	2185527	2186225	PA1999|CDS|dhcA	0	+	-5070
chromosome	2359388	2359398	PA0048_pwm	10.1017	-	6.71e-07	0.0268	CGGCCAGGCCA	chromosome	2351906	2352430	PA2136|CDS|-	0	-	-6959
chromosome	2361780	2361790	PA0048_pwm	10.1017	+	6.71e-07	0.0268	CGGCCAGGCCA	chromosome	2361706	2361873	PA2146|CDS|-	0	+	0
chromosome	2394115	2394125	PA0048_pwm	10.1017	+	6.71e-07	0.0268	CGGCCAGGCCA	chromosome	2393708	2394178	PA2171|CDS|-	0	+	0
chromosome	2461050	2461060	PA0048_pwm	10.1017	-	6.71e-07	0.0268	CGGCCAGGCCA	chromosome	2450766	2451706	PA2226_promoter|QS	0	-	-9345
chromosome	2461050	2461060	PA0048_pwm	10.1017	-	6.71e-07	0.0268	CGGCCAGGCCA	chromosome	2450766	2451706	PA2227_promoter|antibiotic resistance	0	-	-9345
chromosome	2461050	2461060	PA0048_pwm	10.1017	-	6.71e-07	0.0268	CGGCCAGGCCA	chromosome	2450766	2451706	PA2227_promoter|QS	0	-	-9345
chromosome	2461050	2461060	PA0048_pwm	10.1017	-	6.71e-07	0.0268	CGGCCAGGCCA	chromosome	2450766	2451706	PA2227_promoter|T3SS	0	-	-9345
chromosome	2467049	2467059	PA0048_pwm	10.1017	+	6.71e-07	0.0268	CGGCCAGGCCA	chromosome	2466540	2467949	PA2241|biofilm	0	+	0
chromosome	2467049	2467059	PA0048_pwm	10.1017	+	6.71e-07	0.0268	CGGCCAGGCCA	chromosome	2466540	2467949	PA2241|CDS|pslK	0	+	0
chromosome	2489012	2489022	PA0048_pwm	10.1017	+	6.71e-07	0.0268	CGGCCAGGCCA	chromosome	2488950	2489732	PA2260|CDS|-	0	+	0
chromosome	2518815	2518825	PA0048_pwm	10.1017	-	6.71e-07	0.0268	CGGCCAGGCCA	chromosome	2518693	2521104	PA2290|CDS|gcd	0	-	0
chromosome	2585340	2585350	PA0048_pwm	10.1017	+	6.71e-07	0.0268	CGGCCAGGCCA	chromosome	2585299	2586411	PA2341|CDS|-	0	+	0
chromosome	2632536	2632546	PA0048_pwm	10.1017	-	6.71e-07	0.0268	CGGCCAGGCCA	chromosome	2632228	2632698	PA2379|CDS|-	0	-	0
chromosome	2729219	2729229	PA0048_pwm	10.1017	+	6.71e-07	0.0268	CGGCCAGGCCA	chromosome	2728542	2729456	PA2432|antibiotic resistance	0	+	0
chromosome	2729219	2729229	PA0048_pwm	10.1017	+	6.71e-07	0.0268	CGGCCAGGCCA	chromosome	2728542	2729456	PA2432|CDS|bexR	0	+	0
chromosome	2733951	2733961	PA0048_pwm	10.1017	+	6.71e-07	0.0268	CGGCCAGGCCA	chromosome	2737882	2738844	PA2440|CDS|-	0	+	-3922
chromosome	2859141	2859151	PA0048_pwm	10.1017	-	6.71e-07	0.0268	CGGCCAGGCCA	chromosome	2855292	2855547	PA2525_promoter|antibiotic resistance	0	-	-3595
chromosome	2859141	2859151	PA0048_pwm	10.1017	-	6.71e-07	0.0268	CGGCCAGGCCA	chromosome	2855292	2855547	PA2526_promoter|antibiotic resistance	0	-	-3595
chromosome	2859141	2859151	PA0048_pwm	10.1017	-	6.71e-07	0.0268	CGGCCAGGCCA	chromosome	2855292	2855547	PA2527_promoter|antibiotic resistance	0	-	-3595
chromosome	2859141	2859151	PA0048_pwm	10.1017	-	6.71e-07	0.0268	CGGCCAGGCCA	chromosome	2855292	2855547	PA2528_promoter|antibiotic resistance	0	-	-3595
chromosome	2907032	2907042	PA0048_pwm	10.1017	-	6.71e-07	0.0268	CGGCCAGGCCA	chromosome	2906166	2907578	PA2571|CDS|-	0	-	0
chromosome	2954513	2954523	PA0048_pwm	10.1017	-	6.71e-07	0.0268	CGGCCAGGCCA	chromosome	2953416	2954696	PA2612|CDS|serS	0	-	0
chromosome	3110951	3110961	PA0048_pwm	10.1017	+	6.71e-07	0.0268	CGGCCAGGCCA	chromosome	3110901	3111614	PA2749|CDS|endA	0	+	0
chromosome	3485049	3485059	PA0048_pwm	10.1017	+	6.71e-07	0.0268	CGGCCAGGCCA	chromosome	3484354	3486330	PA3105|CDS|xcpQ	0	+	0
chromosome	3561622	3561632	PA0048_pwm	10.1017	+	6.71e-07	0.0268	CGGCCAGGCCA	chromosome	3560621	3561955	PA3170|CDS|-	0	+	0
chromosome	3603752	3603762	PA0048_pwm	10.1017	+	6.71e-07	0.0268	CGGCCAGGCCA	chromosome	3603327	3603971	PA3214|antibiotic resistance	0	+	0
chromosome	3603752	3603762	PA0048_pwm	10.1017	+	6.71e-07	0.0268	CGGCCAGGCCA	chromosome	3603327	3603971	PA3214|CDS|-	0	+	0
chromosome	3660198	3660208	PA0048_pwm	10.1017	+	6.71e-07	0.0268	CGGCCAGGCCA	chromosome	3660022	3663501	PA3271|CDS|-	0	+	0
chromosome	3675481	3675491	PA0048_pwm	10.1017	+	6.71e-07	0.0268	CGGCCAGGCCA	chromosome	3679946	3680461	PA3287|CDS|-	0	+	-4456
chromosome	3858762	3858772	PA0048_pwm	10.1017	+	6.71e-07	0.0268	CGGCCAGGCCA	chromosome	3862309	3864273	PA3456|CDS|-	0	+	-3538
chromosome	3912042	3912052	PA0048_pwm	10.1017	+	6.71e-07	0.0268	CGGCCAGGCCA	chromosome	3911773	3912417	PA3493|CDS|-	0	+	0
chromosome	3968158	3968168	PA0048_pwm	10.1017	+	6.71e-07	0.0268	CGGCCAGGCCA	chromosome	3967025	3968452	PA3543|biofilm	0	+	0
chromosome	3968158	3968168	PA0048_pwm	10.1017	+	6.71e-07	0.0268	CGGCCAGGCCA	chromosome	3967025	3968452	PA3543|CDS|algK	0	+	0
chromosome	3998307	3998317	PA0048_pwm	10.1017	+	6.71e-07	0.0268	CGGCCAGGCCA	chromosome	3998137	3999150	PA3567|CDS|-	0	+	0
chromosome	4089240	4089250	PA0048_pwm	10.1017	+	6.71e-07	0.0268	CGGCCAGGCCA	chromosome	4095172	4095957	PA3657|CDS|map	0	+	-5923
chromosome	4186274	4186284	PA0048_pwm	10.1017	+	6.71e-07	0.0268	CGGCCAGGCCA	chromosome	4185522	4186727	PA3734|CDS|-	0	+	0
chromosome	4242877	4242887	PA0048_pwm	10.1017	+	6.71e-07	0.0268	CGGCCAGGCCA	chromosome	4242416	4243045	PA3783|CDS|-	0	+	0
chromosome	4243472	4243482	PA0048_pwm	10.1017	-	6.71e-07	0.0268	TGGCCTGACCA	chromosome	4243080	4243652	PA3784|antibiotic resistance	0	-	0
chromosome	4243472	4243482	PA0048_pwm	10.1017	-	6.71e-07	0.0268	TGGCCTGACCA	chromosome	4243080	4243652	PA3784|CDS|-	0	-	0
chromosome	4480888	4480898	PA0048_pwm	10.1017	-	6.71e-07	0.0268	CGGCCAGGCCA	chromosome	4480205	4481233	PA4000|CDS|rlpA	0	-	0
chromosome	4543793	4543803	PA0048_pwm	10.1017	-	6.71e-07	0.0268	CGGCCAGGCCA	chromosome	4540783	4541139	PA4062|CDS|-	0	-	-2655
chromosome	4642472	4642482	PA0048_pwm	10.1017	+	6.71e-07	0.0268	CGGCCAGGCCA	chromosome	4641711	4642511	PA4148|CDS|-	0	+	0
chromosome	4927185	4927195	PA0048_pwm	10.1017	+	6.71e-07	0.0268	CGGCCAGGCCA	chromosome	4927036	4927947	PA4397|CDS|panE	0	+	0
chromosome	4942515	4942525	PA0048_pwm	10.1017	+	6.71e-07	0.0268	CGGCCAGGCCA	chromosome	4956328	4956536	PA4421.1|ncRNA|rnpB	0	+	-13804
chromosome	4991706	4991716	PA0048_pwm	10.1017	+	6.71e-07	0.0268	TGGCCTGACCA	chromosome	4991392	4991919	PA4460|biofilm	0	+	0
chromosome	4991706	4991716	PA0048_pwm	10.1017	+	6.71e-07	0.0268	TGGCCTGACCA	chromosome	4991392	4991919	PA4460|CDS|lptH	0	+	0
chromosome	5175849	5175859	PA0048_pwm	10.1017	-	6.71e-07	0.0268	CGGCCAGGCCA	chromosome	5173654	5174652	PA4616|CDS|-	0	-	-1198
chromosome	5180222	5180232	PA0048_pwm	10.1017	-	6.71e-07	0.0268	CGGCCAGGCCA	chromosome	5179437	5182268	PA4621|CDS|-	0	-	0
chromosome	5358672	5358682	PA0048_pwm	10.1017	+	6.71e-07	0.0268	CGGCCAGGCCA	chromosome	5358442	5361258	PA4772|CDS|-	0	+	0
chromosome	5451194	5451204	PA0048_pwm	10.1017	-	6.71e-07	0.0268	CGGCCAGGCCA	chromosome	5434656	5435726	PA4842|CDS|-	0	-	-15469
chromosome	5585914	5585924	PA0048_pwm	10.1017	+	6.71e-07	0.0268	CGGCCAGGCCA	chromosome	5601149	5603095	PA4986|CDS|-	0	+	-15226
chromosome	5742582	5742592	PA0048_pwm	10.1017	-	6.71e-07	0.0268	CGGCCAGGCCA	chromosome	5741524	5742966	PA5099|CDS|-	0	-	0
chromosome	5757082	5757092	PA0048_pwm	10.1017	+	6.71e-07	0.0268	CGGCCAGGCCA	chromosome	5762150	5762575	PA5116|CDS|-	0	+	-5059
chromosome	5758605	5758615	PA0048_pwm	10.1017	+	6.71e-07	0.0268	CGGCCAGGCCA	chromosome	5762150	5762575	PA5116|CDS|-	0	+	-3536
chromosome	5806171	5806181	PA0048_pwm	10.1017	+	6.71e-07	0.0268	CGGCCAGGCCA	chromosome	5805680	5807158	PA5158|antibiotic resistance	0	+	0
chromosome	5806171	5806181	PA0048_pwm	10.1017	+	6.71e-07	0.0268	CGGCCAGGCCA	chromosome	5805680	5807158	PA5158|CDS|-	0	+	0
chromosome	5958197	5958207	PA0048_pwm	10.1017	-	6.71e-07	0.0268	CGGCCAGGCCA	chromosome	5957208	5958257	PA5292|CDS|pchP	0	-	0
chromosome	5974093	5974103	PA0048_pwm	10.1017	-	6.71e-07	0.0268	CGGCCAGGCCA	chromosome	5973833	5974177	PA5305|CDS|-	0	-	0
chromosome	5981881	5981891	PA0048_pwm	10.1017	-	6.71e-07	0.0268	TGGCCTGACCA	chromosome	5980787	5981950	PA5311|CDS|-	0	-	0
chromosome	6107860	6107870	PA0048_pwm	10.1017	+	6.71e-07	0.0268	CGGCCAGGCCA	chromosome	6107111	6108139	PA5427|antibiotic resistance	0	+	0
chromosome	6107860	6107870	PA0048_pwm	10.1017	+	6.71e-07	0.0268	CGGCCAGGCCA	chromosome	6107111	6108139	PA5427|CDS|adhA	0	+	0
chromosome	60880	60890	PA0048_pwm	10.0763	-	1.29e-06	0.0355	TGGCCTGGCCG	chromosome	57212	58594	PA0043|CDS|-	0	-	-2287
chromosome	117884	117894	PA0048_pwm	10.0763	-	1.29e-06	0.0355	TGGCCTTGCCA	chromosome	115046	115298	PA0093_promoter|T6SS	0	-	-2587
chromosome	122667	122677	PA0048_pwm	10.0763	+	1.29e-06	0.0355	TGGCCTGGCCG	chromosome	122248	123495	PA0101|CDS|-	0	+	0
chromosome	166833	166843	PA0048_pwm	10.0763	+	1.29e-06	0.0355	TGGCCTGGCCG	chromosome	165976	167073	PA0146|CDS|-	0	+	0
chromosome	331282	331292	PA0048_pwm	10.0763	+	1.29e-06	0.0355	TGGCCTGGCCG	chromosome	334534	334734	PA0299_promoter|SR and persisters	0	+	-3243
chromosome	385676	385686	PA0048_pwm	10.0763	+	1.29e-06	0.0355	TGGCATGGCCA	chromosome	389334	389696	PA0346|CDS|-	0	+	-3649
chromosome	472566	472576	PA0048_pwm	10.0763	-	1.29e-06	0.0355	TGGCCTGGCCG	chromosome	471749	472023	PA0424_promoter|antibiotic resistance	0	-	-544
chromosome	472566	472576	PA0048_pwm	10.0763	-	1.29e-06	0.0355	TGGCCTGGCCG	chromosome	471750	472023	PA0424_promoter|ROS	0	-	-544
chromosome	565264	565274	PA0048_pwm	10.0763	-	1.29e-06	0.0355	TGGCCTGGCCG	chromosome	558377	559078	PA0499|CDS|-	0	-	-6187
chromosome	581858	581868	PA0048_pwm	10.0763	+	1.29e-06	0.0355	TGGCCTGGCCG	chromosome	581668	581925	PA0522|CDS|-	0	+	0
chromosome	603263	603273	PA0048_pwm	10.0763	+	1.29e-06	0.0355	TGGCCTGGCCG	chromosome	602346	603650	PA0545|CDS|-	0	+	0
chromosome	662819	662829	PA0048_pwm	10.0763	+	1.29e-06	0.0355	TGGCATGGCCA	chromosome	662754	663386	PA0601|CDS|agtR	0	+	0
chromosome	1075875	1075885	PA0048_pwm	10.0763	+	1.29e-06	0.0355	TGGCCTGGCCG	chromosome	1074784	1077303	PA0994|CDS|cupC3	0	+	0
chromosome	1075875	1075885	PA0048_pwm	10.0763	+	1.29e-06	0.0355	TGGCCTGGCCG	chromosome	1074784	1077303	PA0994|motility	0	+	0
chromosome	1109431	1109441	PA0048_pwm	10.0763	-	1.29e-06	0.0355	TGGCCTGGCCG	chromosome	1098328	1099128	PA1015|CDS|-	0	-	-10304
chromosome	1198863	1198873	PA0048_pwm	10.0763	+	1.29e-06	0.0355	TGGCCTGGCCG	chromosome	1201310	1202089	PA1109|CDS|-	0	+	-2438
chromosome	1257415	1257425	PA0048_pwm	10.0763	+	1.29e-06	0.0355	TGGCCTGGCCG	chromosome	1256094	1257452	PA1158|CDS|-	0	+	0
chromosome	1392364	1392374	PA0048_pwm	10.0763	-	1.29e-06	0.0355	TGGCCTGGCCG	chromosome	1378500	1379168	PA1269|CDS|-	0	-	-13197
chromosome	1413195	1413205	PA0048_pwm	10.0763	-	1.29e-06	0.0355	TGGCCTGGCCG	chromosome	1407951	1408931	PA1297|CDS|-	0	-	-4265
chromosome	1423715	1423725	PA0048_pwm	10.0763	-	1.29e-06	0.0355	TGGCCTGGCCG	chromosome	1422355	1423266	PA1312|CDS|-	0	-	-450
chromosome	1449012	1449022	PA0048_pwm	10.0763	+	1.29e-06	0.0355	TGGCCTGGCCG	chromosome	1457175	1457633	PA1343|CDS|-	0	+	-8154
chromosome	1454296	1454306	PA0048_pwm	10.0763	+	1.29e-06	0.0355	TGGCCTGGCCG	chromosome	1457175	1457633	PA1343|CDS|-	0	+	-2870
chromosome	1500747	1500757	PA0048_pwm	10.0763	-	1.29e-06	0.0355	TGGCCTTGCCA	chromosome	1496087	1496920	PA1379|CDS|-	0	-	-3828
chromosome	1570786	1570796	PA0048_pwm	10.0763	-	1.29e-06	0.0355	TGGCCTGGCCG	chromosome	1569721	1570308	PA1440|CDS|-	0	-	-479
chromosome	1624085	1624095	PA0048_pwm	10.0763	+	1.29e-06	0.0355	TGGCCTGGCCG	chromosome	1633006	1633437	PA1503|CDS|-	0	+	-8912
chromosome	1729813	1729823	PA0048_pwm	10.0763	-	1.29e-06	0.0355	TGGCATGGCCA	chromosome	1719109	1720395	PA1580|CDS|gltA	0	-	-9419
chromosome	1735009	1735019	PA0048_pwm	10.0763	-	1.29e-06	0.0355	TGGCCTGGCCG	chromosome	1734827	1735063	PA1592|CDS|-	0	-	0
chromosome	1752378	1752388	PA0048_pwm	10.0763	+	1.29e-06	0.0355	TGGCCTGGCCG	chromosome	1758748	1759770	PA1614|CDS|gpsA	0	+	-6361
chromosome	1799677	1799687	PA0048_pwm	10.0763	+	1.29e-06	0.0355	TGGCCTGGCCG	chromosome	1799385	1800020	PA1652|CDS|-	0	+	0
chromosome	1887937	1887947	PA0048_pwm	10.0763	+	1.29e-06	0.0355	TGGCCTGGCCG	chromosome	1888407	1888913	PA1746|CDS|-	0	+	-461
chromosome	2041006	2041016	PA0048_pwm	10.0763	-	1.29e-06	0.0355	TGGCCTGGCCG	chromosome	2034918	2035940	PA1873|CDS|-	0	-	-5067
chromosome	2111583	2111593	PA0048_pwm	10.0763	+	1.29e-06	0.0355	TGGCATGGCCA	chromosome	2111691	2112203	PA1931|CDS|-	0	+	-99
chromosome	2146271	2146281	PA0048_pwm	10.0763	+	1.29e-06	0.0355	TGGCCTGGCCG	chromosome	2145894	2146502	PA1962|CDS|azoR2	0	+	0
chromosome	2180448	2180458	PA0048_pwm	10.0763	-	1.29e-06	0.0355	TGGCCTGGCCG	chromosome	2179848	2181056	PA1993|CDS|-	0	-	0
chromosome	2359388	2359398	PA0048_pwm	10.0763	+	1.29e-06	0.0355	TGGCCTGGCCG	chromosome	2358364	2360802	PA2144|CDS|glgP	0	+	0
chromosome	2361780	2361790	PA0048_pwm	10.0763	-	1.29e-06	0.0355	TGGCCTGGCCG	chromosome	2360809	2361207	PA2145|CDS|-	0	-	-574
chromosome	2394115	2394125	PA0048_pwm	10.0763	-	1.29e-06	0.0355	TGGCCTGGCCG	chromosome	2388346	2389887	PA2165|CDS|-	0	-	-4229
chromosome	2461050	2461060	PA0048_pwm	10.0763	+	1.29e-06	0.0355	TGGCCTGGCCG	chromosome	2460283	2461470	PA2236|biofilm	0	+	0
chromosome	2461050	2461060	PA0048_pwm	10.0763	+	1.29e-06	0.0355	TGGCCTGGCCG	chromosome	2460283	2461470	PA2236|CDS|pslF	0	+	0
chromosome	2467049	2467059	PA0048_pwm	10.0763	-	1.29e-06	0.0355	TGGCCTGGCCG	chromosome	2450766	2451706	PA2226_promoter|QS	0	-	-15344
chromosome	2467049	2467059	PA0048_pwm	10.0763	-	1.29e-06	0.0355	TGGCCTGGCCG	chromosome	2450766	2451706	PA2227_promoter|antibiotic resistance	0	-	-15344
chromosome	2467049	2467059	PA0048_pwm	10.0763	-	1.29e-06	0.0355	TGGCCTGGCCG	chromosome	2450766	2451706	PA2227_promoter|QS	0	-	-15344
chromosome	2467049	2467059	PA0048_pwm	10.0763	-	1.29e-06	0.0355	TGGCCTGGCCG	chromosome	2450766	2451706	PA2227_promoter|T3SS	0	-	-15344
chromosome	2489012	2489022	PA0048_pwm	10.0763	-	1.29e-06	0.0355	TGGCCTGGCCG	chromosome	2487294	2487855	PA2258_promoter|QS	0	-	-1158
chromosome	2518815	2518825	PA0048_pwm	10.0763	+	1.29e-06	0.0355	TGGCCTGGCCG	chromosome	2549748	2549906	PA2311|CDS|-	0	+	-30924
chromosome	2585340	2585350	PA0048_pwm	10.0763	-	1.29e-06	0.0355	TGGCCTGGCCG	chromosome	2576089	2577000	PA2334|CDS|-	0	-	-8341
chromosome	2632536	2632546	PA0048_pwm	10.0763	+	1.29e-06	0.0355	TGGCCTGGCCG	chromosome	2633494	2633736	PA2381|CDS|-	0	+	-949
chromosome	2729219	2729229	PA0048_pwm	10.0763	-	1.29e-06	0.0355	TGGCCTGGCCG	chromosome	2725967	2728141	PA2431|CDS|-	0	-	-1079
chromosome	2733951	2733961	PA0048_pwm	10.0763	-	1.29e-06	0.0355	TGGCCTGGCCG	chromosome	2733120	2734160	PA2437|CDS|-	0	-	0
chromosome	2859141	2859151	PA0048_pwm	10.0763	+	1.29e-06	0.0355	TGGCCTGGCCG	chromosome	2858503	2859627	PA2531|CDS|-	0	+	0
chromosome	2859141	2859151	PA0048_pwm	10.0763	+	1.29e-06	0.0355	TGGCCTGGCCG	chromosome	2858503	2859627	PA2531|siderophore	0	+	0
chromosome	2907032	2907042	PA0048_pwm	10.0763	+	1.29e-06	0.0355	TGGCCTGGCCG	chromosome	2907656	2908999	PA2572|CDS|-	0	+	-615
chromosome	2954513	2954523	PA0048_pwm	10.0763	+	1.29e-06	0.0355	TGGCCTGGCCG	chromosome	2959468	2960418	PA2616|CDS|trxB1	0	+	-4946
chromosome	3110951	3110961	PA0048_pwm	10.0763	-	1.29e-06	0.0355	TGGCCTGGCCG	chromosome	3109743	3110525	PA2748|CDS|-	0	-	-427
chromosome	3169269	3169279	PA0048_pwm	10.0763	-	1.29e-06	0.0355	TGGCCTTGCCA	chromosome	3167282	3167953	PA2814|CDS|-	0	-	-1317
chromosome	3440813	3440823	PA0048_pwm	10.0763	+	1.29e-06	0.0355	TGGCCTTGCCA	chromosome	3442823	3443803	PA3070|CDS|-	0	+	-2001
chromosome	3485049	3485059	PA0048_pwm	10.0763	-	1.29e-06	0.0355	TGGCCTGGCCG	chromosome	3481914	3483422	PA3103|CDS|xcpR	0	-	-1628
chromosome	3561622	3561632	PA0048_pwm	10.0763	-	1.29e-06	0.0355	TGGCCTGGCCG	chromosome	3559435	3560511	PA3169|CDS|-	0	-	-1112
chromosome	3603752	3603762	PA0048_pwm	10.0763	-	1.29e-06	0.0355	TGGCCTGGCCG	chromosome	3598404	3598775	PA3209|CDS|-	0	-	-4978
chromosome	3660198	3660208	PA0048_pwm	10.0763	-	1.29e-06	0.0355	TGGCCTGGCCG	chromosome	3659169	3659756	PA3270|CDS|-	0	-	-443
chromosome	3675481	3675491	PA0048_pwm	10.0763	-	1.29e-06	0.0355	TGGCCTGGCCG	chromosome	3675163	3675897	PA3282|CDS|-	0	-	0
chromosome	3858762	3858772	PA0048_pwm	10.0763	-	1.29e-06	0.0355	TGGCCTGGCCG	chromosome	3858544	3859209	PA3453|CDS|-	0	-	0
chromosome	3912042	3912052	PA0048_pwm	10.0763	-	1.29e-06	0.0355	TGGCCTGGCCG	chromosome	3894099	3895193	PA3481|CDS|-	0	-	-16850
chromosome	3968158	3968168	PA0048_pwm	10.0763	-	1.29e-06	0.0355	TGGCCTGGCCG	chromosome	3958288	3958755	PA3536|CDS|-	0	-	-9404
chromosome	3998307	3998317	PA0048_pwm	10.0763	-	1.29e-06	0.0355	TGGCCTGGCCG	chromosome	3996806	3997726	PA3565|CDS|-	0	-	-582
chromosome	4089240	4089250	PA0048_pwm	10.0763	-	1.29e-06	0.0355	TGGCCTGGCCG	chromosome	4088904	4090094	PA3650|CDS|dxr	0	-	0
chromosome	4186274	4186284	PA0048_pwm	10.0763	-	1.29e-06	0.0355	TGGCCTGGCCG	chromosome	4182785	4183405	PA3732|CDS|-	0	-	-2870
chromosome	4242877	4242887	PA0048_pwm	10.0763	-	1.29e-06	0.0355	TGGCCTGGCCG	chromosome	4241342	4242295	PA3782|CDS|-	0	-	-583
chromosome	4480888	4480898	PA0048_pwm	10.0763	+	1.29e-06	0.0355	TGGCCTGGCCG	chromosome	4488410	4489633	PA4008|CDS|-	0	+	-7513
chromosome	4543793	4543803	PA0048_pwm	10.0763	+	1.29e-06	0.0355	TGGCCTGGCCG	chromosome	4542658	4543923	PA4065|CDS|-	0	+	0
chromosome	4642472	4642482	PA0048_pwm	10.0763	-	1.29e-06	0.0355	TGGCCTGGCCG	chromosome	4639502	4641379	PA4147|CDS|acoR	0	-	-1094
chromosome	4927185	4927195	PA0048_pwm	10.0763	-	1.29e-06	0.0355	TGGCCTGGCCG	chromosome	4925316	4925795	PA4395|CDS|-	0	-	-1391
chromosome	4942515	4942525	PA0048_pwm	10.0763	-	1.29e-06	0.0355	TGGCCTGGCCG	chromosome	4941810	4942673	PA4409|CDS|ftsQ	0	-	0
chromosome	5175849	5175859	PA0048_pwm	10.0763	+	1.29e-06	0.0355	TGGCCTGGCCG	chromosome	5174980	5176104	PA4617|CDS|-	0	+	0
chromosome	5180222	5180232	PA0048_pwm	10.0763	+	1.29e-06	0.0355	TGGCCTGGCCG	chromosome	5182579	5183790	PA4622|CDS|-	0	+	-2348
chromosome	5286598	5286608	PA0048_pwm	10.0763	-	1.29e-06	0.0355	TGGCCAGACCA	chromosome	5286035	5287018	PA4707|CDS|phuU	0	-	0
chromosome	5286598	5286608	PA0048_pwm	10.0763	-	1.29e-06	0.0355	TGGCCAGACCA	chromosome	5286035	5287018	PA4707|siderophore	0	-	0
chromosome	5358672	5358682	PA0048_pwm	10.0763	-	1.29e-06	0.0355	TGGCCTGGCCG	chromosome	5354285	5355058	PA4769|CDS|-	0	-	-3615
chromosome	5451194	5451204	PA0048_pwm	10.0763	+	1.29e-06	0.0355	TGGCCTGGCCG	chromosome	5450757	5452046	PA4855|CDS|purD	0	+	0
chromosome	5585914	5585924	PA0048_pwm	10.0763	-	1.29e-06	0.0355	TGGCCTGGCCG	chromosome	5585615	5586319	PA4975|CDS|-	0	-	0
chromosome	5742582	5742592	PA0048_pwm	10.0763	+	1.29e-06	0.0355	TGGCCTGGCCG	chromosome	5749453	5750814	PA5106|CDS|-	0	+	-6862
chromosome	5757082	5757092	PA0048_pwm	10.0763	-	1.29e-06	0.0355	TGGCCTGGCCG	chromosome	5756347	5757741	PA5113|CDS|-	0	-	0
chromosome	5758605	5758615	PA0048_pwm	10.0763	-	1.29e-06	0.0355	TGGCCTGGCCG	chromosome	5757738	5761343	PA5114|CDS|-	0	-	0
chromosome	5806171	5806181	PA0048_pwm	10.0763	-	1.29e-06	0.0355	TGGCCTGGCCG	chromosome	5798693	5799430	PA5150|CDS|-	0	-	-6742
chromosome	5958197	5958207	PA0048_pwm	10.0763	+	1.29e-06	0.0355	TGGCCTGGCCG	chromosome	5959326	5959473	PA5294_promoter|antibiotic resistance	0	+	-1120
chromosome	5974093	5974103	PA0048_pwm	10.0763	+	1.29e-06	0.0355	TGGCCTGGCCG	chromosome	5977123	5977611	PA5308|CDS|lrp	0	+	-3021
chromosome	6107860	6107870	PA0048_pwm	10.0763	-	1.29e-06	0.0355	TGGCCTGGCCG	chromosome	6106764	6107110	PA5426_promoter|antibiotic resistance	0	-	-751
chromosome	83060	83070	PA0048_pwm	10.0508	+	1.74e-06	0.0355	TGGCCAGGCCG	chromosome	99757	100123	PA0082_promoter|T6SS	0	+	-16688
chromosome	117884	117894	PA0048_pwm	10.0508	+	1.74e-06	0.0355	TGGCAAGGCCA	chromosome	117552	118001	PA0096|CDS|-	0	+	0
chromosome	128796	128806	PA0048_pwm	10.0508	-	1.74e-06	0.0355	TGGCCAGGCCG	chromosome	115046	115298	PA0093_promoter|T6SS	0	-	-13499
chromosome	157851	157861	PA0048_pwm	10.0508	-	1.74e-06	0.0355	TGGCCAGGCCG	chromosome	151936	153306	PA0134|CDS|-	0	-	-4546
chromosome	201764	201774	PA0048_pwm	10.0508	+	1.74e-06	0.0355	TGGCCAGGCCG	chromosome	207071	207823	PA0182|CDS|-	0	+	-5298
chromosome	313010	313020	PA0048_pwm	10.0508	+	1.74e-06	0.0355	TGGCCAGGCCG	chromosome	313227	313925	PA0279|CDS|-	0	+	-208
chromosome	360505	360515	PA0048_pwm	10.0508	+	1.74e-06	0.0355	TGGCCAGGCCG	chromosome	367457	368422	PA0327|CDS|carP	0	+	-6943
chromosome	375708	375718	PA0048_pwm	10.0508	-	1.74e-06	0.0355	TGGCCAGGCCG	chromosome	371162	371833	PA0330|CDS|rpiA	0	-	-3876
chromosome	376898	376908	PA0048_pwm	10.0508	+	1.74e-06	0.0355	TGGCCAGGCCG	chromosome	377893	378095	PA0336_promoter|antibiotic resistance	0	+	-986
chromosome	376898	376908	PA0048_pwm	10.0508	+	1.74e-06	0.0355	TGGCCAGGCCG	chromosome	377893	378095	PA0337_promoter|antibiotic resistance	0	+	-986
chromosome	376898	376908	PA0048_pwm	10.0508	+	1.74e-06	0.0355	TGGCCAGGCCG	chromosome	377893	378095	PA0338_promoter|antibiotic resistance	0	+	-986
chromosome	385676	385686	PA0048_pwm	10.0508	-	1.74e-06	0.0355	TGGCCATGCCA	chromosome	385554	386351	PA0343|CDS|-	0	-	0
chromosome	390257	390267	PA0048_pwm	10.0508	+	1.74e-06	0.0355	TGGCCAGGCCG	chromosome	391094	392188	PA0348|CDS|-	0	+	-828
chromosome	400391	400401	PA0048_pwm	10.0508	-	1.74e-06	0.0355	TGGCCAGGCCG	chromosome	400033	400247	PA0355_promoter|antibiotic resistance	0	-	-145
chromosome	465509	465519	PA0048_pwm	10.0508	+	1.74e-06	0.0355	TGGCCAGGCCG	chromosome	468410	469900	PA0421|CDS|-	0	+	-2892
chromosome	468607	468617	PA0048_pwm	10.0508	-	1.74e-06	0.0355	TGGCCAGGCCG	chromosome	466833	468236	PA0420|CDS|bioA	0	-	-372
chromosome	520961	520971	PA0048_pwm	10.0508	-	1.74e-06	0.0355	TGGCCAGGCCG	chromosome	516029	517462	PA0458|CDS|-	0	-	-3500
chromosome	542847	542857	PA0048_pwm	10.0508	+	1.74e-06	0.0355	TGGCCAGGCCG	chromosome	544654	545097	PA0483|CDS|-	0	+	-1798
chromosome	550681	550691	PA0048_pwm	10.0508	+	1.74e-06	0.0355	TGGCCAGGCCG	chromosome	551911	552669	PA0492|CDS|-	0	+	-1221
chromosome	560951	560961	PA0048_pwm	10.0508	-	1.74e-06	0.0355	TGGCCAGGCCG	chromosome	558377	559078	PA0499|CDS|-	0	-	-1874
chromosome	565240	565250	PA0048_pwm	10.0508	-	1.74e-06	0.0355	TGGCCAGGCCG	chromosome	558377	559078	PA0499|CDS|-	0	-	-6163
chromosome	582808	582818	PA0048_pwm	10.0508	-	1.74e-06	0.0355	TGGCCAGGCCG	chromosome	578394	580100	PA0519|CDS|nirS	0	-	-2709
chromosome	609777	609787	PA0048_pwm	10.0508	+	1.74e-06	0.0355	TGGCCAGGCCG	chromosome	610000	610213	PA0552_promoter|ROS	0	+	-214
chromosome	662819	662829	PA0048_pwm	10.0508	-	1.74e-06	0.0355	TGGCCATGCCA	chromosome	659102	660163	PA0599|CDS|-	0	-	-2657
chromosome	703824	703834	PA0048_pwm	10.0508	-	1.74e-06	0.0355	TGGCCAGGCCG	chromosome	673962	674418	PA0611_promoter|antibiotic resistance	0	-	-29407
chromosome	703824	703834	PA0048_pwm	10.0508	-	1.74e-06	0.0355	TGGCCAGGCCG	chromosome	673962	674418	PA0611_promoter|ROS	0	-	-29407
chromosome	703824	703834	PA0048_pwm	10.0508	-	1.74e-06	0.0355	TGGCCAGGCCG	chromosome	673962	674418	PA0611_promoter|T3SS	0	-	-29407
chromosome	731623	731633	PA0048_pwm	10.0508	+	1.74e-06	0.0355	TGGCCAGGCCG	chromosome	732654	732958	PA0672_promoter|siderophore	0	+	-1022
chromosome	827002	827012	PA0048_pwm	10.0508	+	1.74e-06	0.0355	TGGCCAGGCCG	chromosome	828617	828871	PA0760|CDS|-	0	+	-1606
chromosome	866136	866146	PA0048_pwm	10.0508	+	1.74e-06	0.0355	TGGCCAGGCCG	chromosome	866558	867346	PA0791|CDS|-	0	+	-413
chromosome	989742	989752	PA0048_pwm	10.0508	-	1.74e-06	0.0355	TGGCCAGGCCG	chromosome	977420	977743	PA0894|CDS|-	0	-	-12000
chromosome	993459	993469	PA0048_pwm	10.0508	-	1.74e-06	0.0355	TGGCCAGGCCG	chromosome	991830	992543	PA0906|CDS|alpR	0	-	-917
chromosome	1143902	1143912	PA0048_pwm	10.0508	-	1.74e-06	0.0355	TGGCCAGGCCG	chromosome	1128857	1129321	PA1044|CDS|-	0	-	-14582
chromosome	1186217	1186227	PA0048_pwm	10.0508	-	1.74e-06	0.0355	TGGCCAGGCCG	chromosome	1161856	1162977	PA1074|CDS|braC	0	-	-23241
chromosome	1200473	1200483	PA0048_pwm	10.0508	+	1.74e-06	0.0355	TGGCCAGGCCG	chromosome	1201310	1202089	PA1109|CDS|-	0	+	-828
chromosome	1400941	1400951	PA0048_pwm	10.0508	+	1.74e-06	0.0355	TGGCCAGGCCG	chromosome	1402117	1402956	PA1291|CDS|-	0	+	-1167
chromosome	1424288	1424298	PA0048_pwm	10.0508	-	1.74e-06	0.0355	TGGCCAGGCCG	chromosome	1422355	1423266	PA1312|CDS|-	0	-	-1023
chromosome	1426922	1426932	PA0048_pwm	10.0508	-	1.74e-06	0.0355	TGGCCAGGCCG	chromosome	1425755	1425911	PA1315_promoter|siderophore	0	-	-1012
chromosome	1431325	1431335	PA0048_pwm	10.0508	-	1.74e-06	0.0355	TGGCCAGGCCG	chromosome	1425755	1425911	PA1315_promoter|siderophore	0	-	-5415
chromosome	1458226	1458236	PA0048_pwm	10.0508	-	1.74e-06	0.0355	TGGCCAGGCCG	chromosome	1455815	1456723	PA1342|CDS|aatJ	0	-	-1504
chromosome	1500747	1500757	PA0048_pwm	10.0508	+	1.74e-06	0.0355	TGGCAAGGCCA	chromosome	1498813	1501092	PA1382|CDS|-	0	+	0
chromosome	1584102	1584112	PA0048_pwm	10.0508	-	1.74e-06	0.0355	TGGCCAGGCCG	chromosome	1569721	1570308	PA1440|CDS|-	0	-	-13795
chromosome	1721888	1721898	PA0048_pwm	10.0508	+	1.74e-06	0.0355	TGGCCAGGCCG	chromosome	1721496	1723268	PA1583|CDS|sdhA	0	+	0
chromosome	1729813	1729823	PA0048_pwm	10.0508	+	1.74e-06	0.0355	TGGCCATGCCA	chromosome	1728416	1729852	PA1587|CDS|lpd	0	+	0
chromosome	1730978	1730988	PA0048_pwm	10.0508	-	1.74e-06	0.0355	TGGCCAGGCCG	chromosome	1719109	1720395	PA1580|CDS|gltA	0	-	-10584
chromosome	1734588	1734598	PA0048_pwm	10.0508	-	1.74e-06	0.0355	TGGCCAGGCCG	chromosome	1719109	1720395	PA1580|CDS|gltA	0	-	-14194
chromosome	1749639	1749649	PA0048_pwm	10.0508	+	1.74e-06	0.0355	TGGCCAGGCCG	chromosome	1758748	1759770	PA1614|CDS|gpsA	0	+	-9100
chromosome	1763909	1763919	PA0048_pwm	10.0508	-	1.74e-06	0.0355	TGGCCAGGCCG	chromosome	1756489	1758597	PA1613|CDS|-	0	-	-5313
chromosome	1772174	1772184	PA0048_pwm	10.0508	+	1.74e-06	0.0355	TGGCCAGGCCG	chromosome	1773441	1773681	PA1630_promoter|siderophore	0	+	-1258
chromosome	1777511	1777521	PA0048_pwm	10.0508	-	1.74e-06	0.0355	TGGCCAGGCCG	chromosome	1772655	1773440	PA1629|CDS|-	0	-	-4072
chromosome	1793246	1793256	PA0048_pwm	10.0508	+	1.74e-06	0.0355	TGGCCAGGCCG	chromosome	1796138	1796899	PA1649|CDS|-	0	+	-2883
chromosome	1793855	1793865	PA0048_pwm	10.0508	+	1.74e-06	0.0355	TGGCCAGGCCG	chromosome	1796138	1796899	PA1649|CDS|-	0	+	-2274
chromosome	1798110	1798120	PA0048_pwm	10.0508	+	1.74e-06	0.0355	TGGCCAGGCCG	chromosome	1799385	1800020	PA1652|CDS|-	0	+	-1266
chromosome	1880122	1880132	PA0048_pwm	10.0508	-	1.74e-06	0.0355	TGGCCAGGCCG	chromosome	1876588	1877409	PA1734|CDS|-	0	-	-2714
chromosome	1931088	1931098	PA0048_pwm	10.0508	+	1.74e-06	0.0355	TGGCCAGGCCG	chromosome	1938026	1938493	PA1788|CDS|-	0	+	-6929
chromosome	1938917	1938927	PA0048_pwm	10.0508	+	1.74e-06	0.0355	TGGCCAGGCCG	chromosome	1939583	1940206	PA1790|CDS|-	0	+	-657
chromosome	1986126	1986136	PA0048_pwm	10.0508	-	1.74e-06	0.0355	TGGCCAGGCCG	chromosome	1985030	1985935	PA1826|CDS|-	0	-	-192
chromosome	2111583	2111593	PA0048_pwm	10.0508	-	1.74e-06	0.0355	TGGCCATGCCA	chromosome	2109558	2109854	PA1929|CDS|-	0	-	-1730
chromosome	2116999	2117009	PA0048_pwm	10.0508	-	1.74e-06	0.0355	TGGCCAGGCCG	chromosome	2109558	2109854	PA1929|CDS|-	0	-	-7146
chromosome	2197812	2197822	PA0048_pwm	10.0508	+	1.74e-06	0.0355	TGGCCAGGCCG	chromosome	2198731	2198890	PA2010_promoter|antibiotic resistance	0	+	-910
chromosome	2350202	2350212	PA0048_pwm	10.0508	-	1.74e-06	0.0355	TGGCCAGGCCG	chromosome	2341641	2342492	PA2126_promoter|motility	0	-	-7711
chromosome	2350202	2350212	PA0048_pwm	10.0508	-	1.74e-06	0.0355	TGGCCAGGCCG	chromosome	2341641	2342492	PA2127_promoter|motility	0	-	-7711
chromosome	2393453	2393463	PA0048_pwm	10.0508	-	1.74e-06	0.0355	TGGCCAGGCCG	chromosome	2388346	2389887	PA2165|CDS|-	0	-	-3567
chromosome	2408424	2408434	PA0048_pwm	10.0508	-	1.74e-06	0.0355	TGGCCAGGCCG	chromosome	2407681	2408847	PA2188|CDS|-	0	-	0
chromosome	2434272	2434282	PA0048_pwm	10.0508	-	1.74e-06	0.0355	TGGCCAGGCCG	chromosome	2427572	2428669	PA2209|CDS|-	0	-	-5604
chromosome	2518489	2518499	PA0048_pwm	10.0508	+	1.74e-06	0.0355	TGGCCAGGCCG	chromosome	2549748	2549906	PA2311|CDS|-	0	+	-31250
chromosome	2579853	2579863	PA0048_pwm	10.0508	-	1.74e-06	0.0355	TGGCCAGGCCG	chromosome	2576089	2577000	PA2334|CDS|-	0	-	-2854
chromosome	2693012	2693022	PA0048_pwm	10.0508	-	1.74e-06	0.0355	TGGCCAGGCCG	chromosome	2671729	2687178	PA2402|CDS|-	0	-	-5835
chromosome	2704077	2704087	PA0048_pwm	10.0508	+	1.74e-06	0.0355	TGGCCAGGCCG	chromosome	2702926	2704344	PA2420|antibiotic resistance	0	+	0
chromosome	2704077	2704087	PA0048_pwm	10.0508	+	1.74e-06	0.0355	TGGCCAGGCCG	chromosome	2702926	2704344	PA2420|CDS|-	0	+	0
chromosome	2781572	2781582	PA0048_pwm	10.0508	+	1.74e-06	0.0355	TGGCCAGGCCG	chromosome	2788011	2789072	PA2470|CDS|gtdA	0	+	-6430
chromosome	2794910	2794920	PA0048_pwm	10.0508	+	1.74e-06	0.0355	TGGCCAGGCCG	chromosome	2797735	2798415	PA2479|CDS|-	0	+	-2816
chromosome	2799626	2799636	PA0048_pwm	10.0508	-	1.74e-06	0.0355	TGGCCAGGCCG	chromosome	2795809	2797572	PA2478|CDS|-	0	-	-2055
chromosome	2859219	2859229	PA0048_pwm	10.0508	-	1.74e-06	0.0355	TGGCCAGGCCG	chromosome	2855292	2855547	PA2525_promoter|antibiotic resistance	0	-	-3673
chromosome	2859219	2859229	PA0048_pwm	10.0508	-	1.74e-06	0.0355	TGGCCAGGCCG	chromosome	2855292	2855547	PA2526_promoter|antibiotic resistance	0	-	-3673
chromosome	2859219	2859229	PA0048_pwm	10.0508	-	1.74e-06	0.0355	TGGCCAGGCCG	chromosome	2855292	2855547	PA2527_promoter|antibiotic resistance	0	-	-3673
chromosome	2859219	2859229	PA0048_pwm	10.0508	-	1.74e-06	0.0355	TGGCCAGGCCG	chromosome	2855292	2855547	PA2528_promoter|antibiotic resistance	0	-	-3673
chromosome	2870197	2870207	PA0048_pwm	10.0508	+	1.74e-06	0.0355	TGGCCAGGCCG	chromosome	2876555	2877367	PA2545|CDS|xthA	0	+	-6349
chromosome	2888412	2888422	PA0048_pwm	10.0508	+	1.74e-06	0.0355	TGGCCAGGCCG	chromosome	2892271	2892963	PA2558|CDS|-	0	+	-3850
chromosome	2903822	2903832	PA0048_pwm	10.0508	-	1.74e-06	0.0355	TGGCCAGGCCG	chromosome	2901560	2902047	PA2566_promoter|antibiotic resistance	0	-	-1776
chromosome	2960893	2960903	PA0048_pwm	10.0508	-	1.74e-06	0.0355	TGGCCAGGCCG	chromosome	2959241	2959467	PA2615_promoter|antibiotic resistance	0	-	-1427
chromosome	2987241	2987251	PA0048_pwm	10.0508	-	1.74e-06	0.0355	TGGCCAGGCCG	chromosome	2965546	2966802	PA2623|CDS|icd	0	-	-20440
chromosome	3066325	3066335	PA0048_pwm	10.0508	-	1.74e-06	0.0355	TGGCCAGGCCG	chromosome	3061733	3062818	PA2708|CDS|-	0	-	-3508
chromosome	3114293	3114303	PA0048_pwm	10.0508	+	1.74e-06	0.0355	TGGCCAGGCCG	chromosome	3114819	3115193	PA2753|CDS|-	0	+	-517
chromosome	3169269	3169279	PA0048_pwm	10.0508	+	1.74e-06	0.0355	TGGCAAGGCCA	chromosome	3168106	3170553	PA2815|CDS|-	0	+	0
chromosome	3178966	3178976	PA0048_pwm	10.0508	+	1.74e-06	0.0355	TGGCCAGGCCG	chromosome	3177090	3179450	PA2824|biofilm	0	+	0
chromosome	3178966	3178976	PA0048_pwm	10.0508	+	1.74e-06	0.0355	TGGCCAGGCCG	chromosome	3177090	3179450	PA2824|CDS|sagS	0	+	0
chromosome	3214308	3214318	PA0048_pwm	10.0508	-	1.74e-06	0.0355	TGGCCAGGCCG	chromosome	3213044	3213484	PA2860|CDS|-	0	-	-825
chromosome	3216836	3216846	PA0048_pwm	10.0508	+	1.74e-06	0.0355	TGGCCAGGCCG	chromosome	3218666	3219469	PA2866|CDS|mttC	0	+	-1821
chromosome	3264782	3264792	PA0048_pwm	10.0508	+	1.74e-06	0.0355	TGGCCAGGCCG	chromosome	3265848	3268004	PA2911|CDS|-	0	+	-1057
chromosome	3265031	3265041	PA0048_pwm	10.0508	-	1.74e-06	0.0355	TGGCCAGGCCG	chromosome	3264642	3265211	PA2910|CDS|-	0	-	0
chromosome	3338183	3338193	PA0048_pwm	10.0508	+	1.74e-06	0.0355	TGGCCAGGCCG	chromosome	3343178	3343711	PA2985|CDS|-	0	+	-4986
chromosome	3378178	3378188	PA0048_pwm	10.0508	+	1.74e-06	0.0355	TGGCCAGGCCG	chromosome	3378512	3378949	PA3017|CDS|-	0	+	-325
chromosome	3413158	3413168	PA0048_pwm	10.0508	-	1.74e-06	0.0355	TGGCCAGGCCG	chromosome	3411763	3413940	PA3048|CDS|-	0	-	0
chromosome	3413163	3413173	PA0048_pwm	10.0508	+	1.74e-06	0.0355	TGGCCAGGCCG	chromosome	3414401	3414613	PA3049|CDS|rmf	0	+	-1229
chromosome	3426715	3426725	PA0048_pwm	10.0508	+	1.74e-06	0.0355	TGGCCAGGCCG	chromosome	3442823	3443803	PA3070|CDS|-	0	+	-16099
chromosome	3440813	3440823	PA0048_pwm	10.0508	-	1.74e-06	0.0355	TGGCAAGGCCA	chromosome	3436578	3441440	PA3068|CDS|gdhB	0	-	0
chromosome	3476694	3476704	PA0048_pwm	10.0508	-	1.74e-06	0.0355	TGGCCAGGCCG	chromosome	3476482	3477630	PA3096|CDS|xcpY	0	-	0
chromosome	3578941	3578951	PA0048_pwm	10.0508	+	1.74e-06	0.0355	TGGCCAGGCCG	chromosome	3587304	3587432	PA3195_promoter|ROS	0	+	-8354
chromosome	3653275	3653285	PA0048_pwm	10.0508	-	1.74e-06	0.0355	TGGCCAGGCCG	chromosome	3650815	3650890	PA3262.2|tRNA|tRNA-Val	0	-	-2386
chromosome	3743041	3743051	PA0048_pwm	10.0508	-	1.74e-06	0.0355	TGGCCAGGCCG	chromosome	3729471	3730076	PA3326|CDS|clpP2	0	-	-12966
chromosome	3831680	3831690	PA0048_pwm	10.0508	+	1.74e-06	0.0355	TGGCCAGGCCG	chromosome	3832940	3833683	PA3423|CDS|-	0	+	-1251
chromosome	3835824	3835834	PA0048_pwm	10.0508	+	1.74e-06	0.0355	TGGCCAGGCCG	chromosome	3840844	3841737	PA3433|CDS|-	0	+	-5011
chromosome	3860477	3860487	PA0048_pwm	10.0508	+	1.74e-06	0.0355	TGGCCAGGCCG	chromosome	3862309	3864273	PA3456|CDS|-	0	+	-1823
chromosome	3866100	3866110	PA0048_pwm	10.0508	-	1.74e-06	0.0355	TGGCCAGGCCG	chromosome	3865281	3865754	PA3458|CDS|-	0	-	-347
chromosome	3869380	3869390	PA0048_pwm	10.0508	-	1.74e-06	0.0355	TGGCCAGGCCG	chromosome	3865281	3865754	PA3458|CDS|-	0	-	-3627
chromosome	3880641	3880651	PA0048_pwm	10.0508	-	1.74e-06	0.0355	TGGCCAGGCCG	chromosome	3878033	3879373	PA3466|CDS|-	0	-	-1269
chromosome	3924487	3924497	PA0048_pwm	10.0508	+	1.74e-06	0.0355	TGGCCAGGCCG	chromosome	3944184	3944570	PA3524|CDS|gloA1	0	+	-19688
chromosome	3965657	3965667	PA0048_pwm	10.0508	-	1.74e-06	0.0355	TGGCCAGGCCG	chromosome	3958288	3958755	PA3536|CDS|-	0	-	-6903
chromosome	4101195	4101205	PA0048_pwm	10.0508	+	1.74e-06	0.0355	TGGCCAGGCCG	chromosome	4102087	4102446	PA3661|CDS|-	0	+	-883
chromosome	4116112	4116122	PA0048_pwm	10.0508	-	1.74e-06	0.0355	TGGCCAGGCCG	chromosome	4111078	4112001	PA3672|CDS|-	0	-	-4112
chromosome	4142547	4142557	PA0048_pwm	10.0508	-	1.74e-06	0.0355	TGGCCAGGCCG	chromosome	4140884	4142389	PA3700|CDS|lysS	0	-	-159
chromosome	4148650	4148660	PA0048_pwm	10.0508	+	1.74e-06	0.0355	TGGCCAGGCCG	chromosome	4156184	4157089	PA3711|CDS|-	0	+	-7525
chromosome	4185818	4185828	PA0048_pwm	10.0508	-	1.74e-06	0.0355	TGGCCAGGCCG	chromosome	4182785	4183405	PA3732|CDS|-	0	-	-2414
chromosome	4188118	4188128	PA0048_pwm	10.0508	+	1.74e-06	0.0355	TGGCCAGGCCG	chromosome	4191727	4193562	PA3739|CDS|-	0	+	-3600
chromosome	4211164	4211174	PA0048_pwm	10.0508	-	1.74e-06	0.0355	TGGCCAGGCCG	chromosome	4205296	4205907	PA3754|CDS|-	0	-	-5258
chromosome	4232605	4232615	PA0048_pwm	10.0508	-	1.74e-06	0.0355	TGGCCAGGCCG	chromosome	4227317	4228786	PA3770|CDS|guaB	0	-	-3820
chromosome	4279880	4279890	PA0048_pwm	10.0508	+	1.74e-06	0.0355	TGGCCAGGCCG	chromosome	4281665	4281751	PA3824.1|tRNA|tRNA-Leu	0	+	-1776
chromosome	4390574	4390584	PA0048_pwm	10.0508	-	1.74e-06	0.0355	TGGCCAGGCCG	chromosome	4387336	4388727	PA3919|CDS|-	0	-	-1848
chromosome	4396493	4396503	PA0048_pwm	10.0508	+	1.74e-06	0.0355	TGGCCAGGCCG	chromosome	4400123	4401298	PA3925|CDS|-	0	+	-3621
chromosome	4587085	4587095	PA0048_pwm	10.0508	-	1.74e-06	0.0355	TGGCCAGGCCG	chromosome	4576372	4577331	PA4094|CDS|-	0	-	-9755
chromosome	4722774	4722784	PA0048_pwm	10.0508	+	1.74e-06	0.0355	TGGCCAGGCCG	chromosome	4742424	4744067	PA4228|CDS|pchD	0	+	-19641
chromosome	4748374	4748384	PA0048_pwm	10.0508	+	1.74e-06	0.0355	TGGCCAGGCCG	chromosome	4748756	4751593	PA4234|CDS|uvrA	0	+	-373
chromosome	4815435	4815445	PA0048_pwm	10.0508	-	1.74e-06	0.0355	TGGCCAGGCCG	chromosome	4812598	4814214	PA4290|CDS|-	0	-	-1222
chromosome	4816861	4816871	PA0048_pwm	10.0508	+	1.74e-06	0.0355	TGGCCAGGCCG	chromosome	4819928	4820410	PA4295|CDS|fppA	0	+	-3058
chromosome	4882919	4882929	PA0048_pwm	10.0508	-	1.74e-06	0.0355	TGGCCAGGCCG	chromosome	4881328	4881900	PA4353|CDS|-	0	-	-1020
chromosome	4891734	4891744	PA0048_pwm	10.0508	+	1.74e-06	0.0355	TGGCCAGGCCG	chromosome	4892345	4892746	PA4364|CDS|-	0	+	-602
chromosome	4892915	4892925	PA0048_pwm	10.0508	-	1.74e-06	0.0355	TGGCCAGGCCG	chromosome	4891345	4892247	PA4363|CDS|iciA	0	-	-669
chromosome	4903813	4903823	PA0048_pwm	10.0508	-	1.74e-06	0.0355	TGGCCAGGCCG	chromosome	4897427	4897999	PA4369|CDS|-	0	-	-5815
chromosome	4907651	4907661	PA0048_pwm	10.0508	+	1.74e-06	0.0355	TGGCCAGGCCG	chromosome	4904647	4907703	PA4375|antibiotic resistance	0	+	0
chromosome	4907651	4907661	PA0048_pwm	10.0508	+	1.74e-06	0.0355	TGGCCAGGCCG	chromosome	4904647	4907703	PA4375|CDS|mexW	0	+	0
chromosome	4924780	4924790	PA0048_pwm	10.0508	+	1.74e-06	0.0355	TGGCCAGGCCG	chromosome	4925899	4926999	PA4396|CDS|-	0	+	-1110
chromosome	5043042	5043052	PA0048_pwm	10.0508	-	1.74e-06	0.0355	TGGCCAGGCCG	chromosome	5034860	5036077	PA4498|CDS|mdpA	0	-	-6966
chromosome	5052002	5052012	PA0048_pwm	10.0508	-	1.74e-06	0.0355	TGGCCAGGCCG	chromosome	5050848	5053400	PA4513|CDS|-	0	-	0
chromosome	5142253	5142263	PA0048_pwm	10.0508	+	1.74e-06	0.0355	TGGCCAGGCCG	chromosome	5149064	5149582	PA4596|CDS|esrC	0	+	-6802
chromosome	5160276	5160286	PA0048_pwm	10.0508	-	1.74e-06	0.0355	TGGCCAGGCCG	chromosome	5155401	5155560	PA4597_promoter|antibiotic resistance	0	-	-4717
chromosome	5160276	5160286	PA0048_pwm	10.0508	-	1.74e-06	0.0355	TGGCCAGGCCG	chromosome	5155401	5155560	PA4598_promoter|antibiotic resistance	0	-	-4717
chromosome	5160276	5160286	PA0048_pwm	10.0508	-	1.74e-06	0.0355	TGGCCAGGCCG	chromosome	5155401	5155560	PA4599_promoter|antibiotic resistance	0	-	-4717
chromosome	5200723	5200733	PA0048_pwm	10.0508	-	1.74e-06	0.0355	TGGCCAGGCCG	chromosome	5199503	5200324	PA4632|CDS|-	0	-	-400
chromosome	5214277	5214287	PA0048_pwm	10.0508	-	1.74e-06	0.0355	TGGCCAGGCCG	chromosome	5212107	5212664	PA4645|CDS|-	0	-	-1614
chromosome	5222546	5222556	PA0048_pwm	10.0508	-	1.74e-06	0.0355	TGGCCAGGCCG	chromosome	5222540	5223562	PA4655|CDS|hemH	0	-	0
chromosome	5230215	5230225	PA0048_pwm	10.0508	-	1.74e-06	0.0355	TGGCCAGGCCG	chromosome	5230114	5230911	PA4662|CDS|murI	0	-	0
chromosome	5245022	5245032	PA0048_pwm	10.0508	-	1.74e-06	0.0355	TGGCCAGGCCG	chromosome	5242850	5243177	PA4674.1_promoter|biofilm	0	-	-1846
chromosome	5245022	5245032	PA0048_pwm	10.0508	-	1.74e-06	0.0355	TGGCCAGGCCG	chromosome	5242850	5243177	PA4674.1_promoter|QS	0	-	-1846
chromosome	5245022	5245032	PA0048_pwm	10.0508	-	1.74e-06	0.0355	TGGCCAGGCCG	chromosome	5242850	5243177	PA4674.1_promoter|SR and persisters	0	-	-1846
chromosome	5245022	5245032	PA0048_pwm	10.0508	-	1.74e-06	0.0355	TGGCCAGGCCG	chromosome	5242850	5243177	PA4674.1_promoter|T3SS	0	-	-1846
chromosome	5245022	5245032	PA0048_pwm	10.0508	-	1.74e-06	0.0355	TGGCCAGGCCG	chromosome	5242850	5243177	PA4674_promoter|biofilm	0	-	-1846
chromosome	5245022	5245032	PA0048_pwm	10.0508	-	1.74e-06	0.0355	TGGCCAGGCCG	chromosome	5242850	5243177	PA4674_promoter|QS	0	-	-1846
chromosome	5245022	5245032	PA0048_pwm	10.0508	-	1.74e-06	0.0355	TGGCCAGGCCG	chromosome	5242850	5243177	PA4674_promoter|SR and persisters	0	-	-1846
chromosome	5245022	5245032	PA0048_pwm	10.0508	-	1.74e-06	0.0355	TGGCCAGGCCG	chromosome	5242850	5243177	PA4674_promoter|T3SS	0	-	-1846
chromosome	5271808	5271818	PA0048_pwm	10.0508	+	1.74e-06	0.0355	TGGCCAGGCCG	chromosome	5276283	5276735	PA4697|CDS|-	0	+	-4466
chromosome	5279431	5279441	PA0048_pwm	10.0508	+	1.74e-06	0.0355	TGGCCAGGCCG	chromosome	5280505	5282067	PA4701|CDS|-	0	+	-1065
chromosome	5318236	5318246	PA0048_pwm	10.0508	+	1.74e-06	0.0355	TGGCCAGGCCG	chromosome	5317569	5318450	PA4734|antibiotic resistance	0	+	0
chromosome	5318236	5318246	PA0048_pwm	10.0508	+	1.74e-06	0.0355	TGGCCAGGCCG	chromosome	5317569	5318450	PA4734|CDS|-	0	+	0
chromosome	5413243	5413253	PA0048_pwm	10.0508	+	1.74e-06	0.0355	TGGCCAGGCCG	chromosome	5419863	5420318	PA4828|CDS|-	0	+	-6611
chromosome	5420856	5420866	PA0048_pwm	10.0508	+	1.74e-06	0.0355	TGGCCAGGCCG	chromosome	5421899	5422438	PA4830|CDS|-	0	+	-1034
chromosome	5471415	5471425	PA0048_pwm	10.0508	-	1.74e-06	0.0355	TGGCCAGGCCG	chromosome	5469115	5469978	PA4872|CDS|-	0	-	-1438
chromosome	5482350	5482360	PA0048_pwm	10.0508	-	1.74e-06	0.0355	TGGCCAGGCCG	chromosome	5479641	5480264	PA4884|CDS|-	0	-	-2087
chromosome	5507808	5507818	PA0048_pwm	10.0508	+	1.74e-06	0.0355	TGGCCAGGCCG	chromosome	5513732	5514670	PA4914|CDS|amaR	0	+	-5915
chromosome	5520286	5520296	PA0048_pwm	10.0508	-	1.74e-06	0.0355	TGGCCAGGCCG	chromosome	5517712	5517820	PA4916_promoter|T3SS	0	-	-2467
chromosome	5520286	5520296	PA0048_pwm	10.0508	-	1.74e-06	0.0355	TGGCCAGGCCG	chromosome	5517712	5517820	PA4917_promoter|T3SS	0	-	-2467
chromosome	5524398	5524408	PA0048_pwm	10.0508	+	1.74e-06	0.0355	TGGCCAGGCCG	chromosome	5530973	5533015	PA4929|CDS|-	0	+	-6566
chromosome	5597090	5597100	PA0048_pwm	10.0508	+	1.74e-06	0.0355	TGGCCAGGCCG	chromosome	5601149	5603095	PA4986|CDS|-	0	+	-4050
chromosome	5642440	5642450	PA0048_pwm	10.0508	-	1.74e-06	0.0355	TGGCCAGGCCG	chromosome	5632926	5635874	PA5014|CDS|glnE	0	-	-6567
chromosome	5642785	5642795	PA0048_pwm	10.0508	-	1.74e-06	0.0355	TGGCCAGGCCG	chromosome	5632926	5635874	PA5014|CDS|glnE	0	-	-6912
chromosome	5691857	5691867	PA0048_pwm	10.0508	-	1.74e-06	0.0355	TGGCCAGGCCG	chromosome	5687105	5687320	PA5049|CDS|rpmE	0	-	-4538
chromosome	5697431	5697441	PA0048_pwm	10.0508	-	1.74e-06	0.0355	TGGCCAGGCCG	chromosome	5687105	5687320	PA5049|CDS|rpmE	0	-	-10112
chromosome	5723469	5723479	PA0048_pwm	10.0508	+	1.74e-06	0.0355	TGGCCAGGCCG	chromosome	5723630	5724538	PA5085|CDS|dguR	0	+	-152
chromosome	5761874	5761884	PA0048_pwm	10.0508	+	1.74e-06	0.0355	TGGCCAGGCCG	chromosome	5762150	5762575	PA5116|CDS|-	0	+	-267
chromosome	5769032	5769042	PA0048_pwm	10.0508	+	1.74e-06	0.0355	TGGCCAGGCCG	chromosome	5770937	5771458	PA5122|CDS|-	0	+	-1896
chromosome	5773257	5773267	PA0048_pwm	10.0508	-	1.74e-06	0.0355	TGGCCAGGCCG	chromosome	5768442	5770649	PA5121|CDS|-	0	-	-2609
chromosome	5809561	5809571	PA0048_pwm	10.0508	-	1.74e-06	0.0355	TGGCCAGGCCG	chromosome	5798693	5799430	PA5150|CDS|-	0	-	-10132
chromosome	5815415	5815425	PA0048_pwm	10.0508	-	1.74e-06	0.0355	TGGCCAGGCCG	chromosome	5798693	5799430	PA5150|CDS|-	0	-	-15986
chromosome	5966160	5966170	PA0048_pwm	10.0508	-	1.74e-06	0.0355	TGGCCAGGCCG	chromosome	5960852	5962528	PA5295|CDS|-	0	-	-3633
chromosome	6018592	6018602	PA0048_pwm	10.0508	+	1.74e-06	0.0355	TGGCCAGGCCG	chromosome	6023907	6024662	PA5356|CDS|glcC	0	+	-5306
chromosome	6028732	6028742	PA0048_pwm	10.0508	-	1.74e-06	0.0355	TGGCCAGGCCG	chromosome	6026219	6026674	PA5359|CDS|-	0	-	-2059
chromosome	6054656	6054666	PA0048_pwm	10.0508	+	1.74e-06	0.0355	TGGCCAGGCCG	chromosome	6056877	6058253	PA5379|CDS|sdaB	0	+	-2212
chromosome	6076038	6076048	PA0048_pwm	10.0508	-	1.74e-06	0.0355	TGGCCAGGCCG	chromosome	6071912	6073384	PA5394|CDS|cls	0	-	-2655
chromosome	6095491	6095501	PA0048_pwm	10.0508	-	1.74e-06	0.0355	TGGCCAGGCCG	chromosome	6093167	6093808	PA5414|CDS|-	0	-	-1684
chromosome	6129306	6129316	PA0048_pwm	10.0508	+	1.74e-06	0.0355	TGGCCAGGCCG	chromosome	6131088	6133274	PA5443|CDS|uvrD	0	+	-1773
chromosome	6184248	6184258	PA0048_pwm	10.0508	+	1.74e-06	0.0355	TGGCCAGGCCG	chromosome	6186603	6186893	PA5494|CDS|-	0	+	-2346
chromosome	6211450	6211460	PA0048_pwm	10.0508	+	1.74e-06	0.0355	TGGCCAGGCCG	chromosome	6212790	6213533	PA5520|CDS|-	0	+	-1331
chromosome	154485	154495	PA0048_pwm	10.0254	+	1.91e-06	0.0355	TTGCCTGGCCA	chromosome	154417	155988	PA0136|CDS|-	0	+	0
chromosome	3254205	3254215	PA0048_pwm	10.0254	-	1.91e-06	0.0355	TTGCCTGGCCA	chromosome	3253766	3254404	PA2899|CDS|atvR	0	-	0
chromosome	4408474	4408484	PA0048_pwm	10.0254	-	1.91e-06	0.0355	TTGCCTGGCCA	chromosome	4404902	4406368	PA3930|CDS|cioA	0	-	-2107
chromosome	4970383	4970393	PA0048_pwm	10.0254	-	1.91e-06	0.0355	TTGCCTGGCCA	chromosome	4967313	4968458	PA4435|CDS|-	0	-	-1926
chromosome	5036724	5036734	PA0048_pwm	10.0254	+	1.91e-06	0.0355	TTGCCTGGCCA	chromosome	5036245	5036808	PA4499|CDS|psdR	0	+	0
chromosome	876428	876438	PA0048_pwm	10	-	2.08e-06	0.0355	TTGCCAGGCCA	chromosome	875113	875835	PA0797|CDS|-	0	-	-594
chromosome	1223099	1223109	PA0048_pwm	10	+	2.08e-06	0.0355	TTGCCAGGCCA	chromosome	1224641	1225330	PA1132|CDS|-	0	+	-1533
chromosome	1962666	1962676	PA0048_pwm	10	+	2.08e-06	0.0355	TTGCCAGGCCA	chromosome	1972195	1972956	PA1814|CDS|kerV	0	+	-9520
chromosome	2440983	2440993	PA0048_pwm	10	+	2.08e-06	0.0355	TTGCCAGGCCA	chromosome	2441771	2442691	PA2220|CDS|-	0	+	-779
chromosome	6236152	6236162	PA0048_pwm	10	+	2.08e-06	0.0355	TTGCCAGGCCA	chromosome	6240870	6241493	PA5547|CDS|-	0	+	-4709
chromosome	5286598	5286608	PA0048_pwm	9.9661	+	2.24e-06	0.0355	TGGTCTGGCCA	chromosome	5289037	5289216	PA4710_promoter|siderophore	0	+	-2430
chromosome	1343830	1343840	PA0048_pwm	9.94068	-	2.41e-06	0.0355	TGGTCAGGCCA	chromosome	1341851	1342648	PA1240|CDS|-	0	-	-1183
chromosome	1402464	1402474	PA0048_pwm	9.94068	+	2.41e-06	0.0355	TGGTCAGGCCA	chromosome	1402117	1402956	PA1291|CDS|-	0	+	0
chromosome	1677747	1677757	PA0048_pwm	9.94068	-	2.41e-06	0.0355	TGGTCAGGCCA	chromosome	1675862	1677445	PA1538|CDS|-	0	-	-303
chromosome	4243472	4243482	PA0048_pwm	9.94068	+	2.41e-06	0.0355	TGGTCAGGCCA	chromosome	4244876	4245724	PA3787|CDS|-	0	+	-1395
chromosome	4991706	4991716	PA0048_pwm	9.94068	-	2.41e-06	0.0355	TGGTCAGGCCA	chromosome	4988892	4989304	PA4452_promoter|antibiotic resistance	0	-	-2403
chromosome	4991706	4991716	PA0048_pwm	9.94068	-	2.41e-06	0.0355	TGGTCAGGCCA	chromosome	4988892	4989304	PA4456_promoter|antibiotic resistance	0	-	-2403
chromosome	5981881	5981891	PA0048_pwm	9.94068	+	2.41e-06	0.0355	TGGTCAGGCCA	chromosome	5983820	5985154	PA5313|CDS|gabT2	0	+	-1930
chromosome	876428	876438	PA0048_pwm	9.9322	+	2.58e-06	0.0355	TGGCCTGGCAA	chromosome	875953	876603	PA0798|CDS|pmtA	0	+	0
chromosome	1223099	1223109	PA0048_pwm	9.9322	-	2.58e-06	0.0355	TGGCCTGGCAA	chromosome	1223060	1224328	PA1131|CDS|-	0	-	0
chromosome	1962666	1962676	PA0048_pwm	9.9322	-	2.58e-06	0.0355	TGGCCTGGCAA	chromosome	1962046	1963656	PA1807|CDS|nppD	0	-	0
chromosome	2440983	2440993	PA0048_pwm	9.9322	-	2.58e-06	0.0355	TGGCCTGGCAA	chromosome	2440347	2441555	PA2219|CDS|opdE	0	-	0
chromosome	6236152	6236162	PA0048_pwm	9.9322	-	2.58e-06	0.0355	TGGCCTGGCAA	chromosome	6235831	6236229	PA5543|CDS|-	0	-	0
chromosome	61983	61993	PA0048_pwm	9.92373	+	2.72e-06	0.0355	CGGCCTGACCA	chromosome	61879	62388	PA0047|CDS|-	0	+	0
chromosome	102497	102507	PA0048_pwm	9.92373	+	2.72e-06	0.0355	CGGCCTGACCA	chromosome	101778	103274	PA0084|CDS|tssC1	0	+	0
chromosome	102497	102507	PA0048_pwm	9.92373	+	2.72e-06	0.0355	CGGCCTGACCA	chromosome	101778	103274	PA0084|T6SS	0	+	0
chromosome	207571	207581	PA0048_pwm	9.92373	+	2.72e-06	0.0355	CGGCCTGACCA	chromosome	207071	207823	PA0182|CDS|-	0	+	0
chromosome	254859	254869	PA0048_pwm	9.92373	+	2.72e-06	0.0355	CGGCCTGACCA	chromosome	254791	255330	PA0225|CDS|-	0	+	0
chromosome	420188	420198	PA0048_pwm	9.92373	+	2.72e-06	0.0355	CGGCCTGACCA	chromosome	419562	420569	PA0375|CDS|ftsX	0	+	0
chromosome	522490	522500	PA0048_pwm	9.92373	-	2.72e-06	0.0355	CGGCCTGACCA	chromosome	521630	522517	PA0461|CDS|-	0	-	0
chromosome	577424	577434	PA0048_pwm	9.92373	-	2.72e-06	0.0355	CGGCCTGACCA	chromosome	576498	577676	PA0516|CDS|nirF	0	-	0
chromosome	619853	619863	PA0048_pwm	9.92373	-	2.72e-06	0.0355	CGGCCTGACCA	chromosome	619332	620006	PA0562|CDS|-	0	-	0
chromosome	854695	854705	PA0048_pwm	9.92373	+	2.72e-06	0.0355	CGGCCTGACCA	chromosome	851783	854965	PA0782|CDS|putA	0	+	0
chromosome	980425	980435	PA0048_pwm	9.92373	+	2.72e-06	0.0355	CGGCCTGACCA	chromosome	980357	981379	PA0897|CDS|aruG	0	+	0
chromosome	997826	997836	PA0048_pwm	9.92373	-	2.72e-06	0.0355	CGGCCTGACCA	chromosome	997536	997928	PA0914|CDS|-	0	-	0
chromosome	1159389	1159399	PA0048_pwm	9.92373	-	2.72e-06	0.0355	CGGCCTGACCA	chromosome	1158658	1159425	PA1071|CDS|braF	0	-	0
chromosome	1159496	1159506	PA0048_pwm	9.92373	-	2.72e-06	0.0355	CGGCCTGACCA	chromosome	1159422	1160675	PA1072|CDS|braE	0	-	0
chromosome	1242209	1242219	PA0048_pwm	9.92373	-	2.72e-06	0.0355	CGGCCTGACCA	chromosome	1240584	1242500	PA1148|CDS|toxA	0	-	0
chromosome	1243229	1243239	PA0048_pwm	9.92373	+	2.72e-06	0.0355	CGGCCTGACCA	chromosome	1243594	1245663	PA1150|CDS|pys2	0	+	-356
chromosome	1394265	1394275	PA0048_pwm	9.92373	+	2.72e-06	0.0355	CGGCCTGACCA	chromosome	1394188	1394748	PA1283|CDS|-	0	+	0
chromosome	1502675	1502685	PA0048_pwm	9.92373	+	2.72e-06	0.0355	CGGCCTGACCA	chromosome	1501611	1503416	PA1383|CDS|-	0	+	0
chromosome	1546438	1546448	PA0048_pwm	9.92373	-	2.72e-06	0.0355	CGGCCTGACCA	chromosome	1546271	1547230	PA1421|CDS|gbuA	0	-	0
chromosome	1618989	1618999	PA0048_pwm	9.92373	+	2.72e-06	0.0355	CGGCCTGACCA	chromosome	1618612	1619847	PA1491|CDS|-	0	+	0
chromosome	1708576	1708586	PA0048_pwm	9.92373	-	2.72e-06	0.0355	CGGCCTGACCA	chromosome	1708004	1709401	PA1567|CDS|-	0	-	0
chromosome	1726403	1726413	PA0048_pwm	9.92373	+	2.72e-06	0.0355	CGGCCTGACCA	chromosome	1724244	1727075	PA1585|CDS|sucA	0	+	0
chromosome	1796632	1796642	PA0048_pwm	9.92373	+	2.72e-06	0.0355	CGGCCTGACCA	chromosome	1796138	1796899	PA1649|CDS|-	0	+	0
chromosome	1913256	1913266	PA0048_pwm	9.92373	-	2.72e-06	0.0355	CGGCCTGACCA	chromosome	1913047	1913871	PA1769|CDS|-	0	-	0
chromosome	1919773	1919783	PA0048_pwm	9.92373	+	2.72e-06	0.0355	CGGCCTGACCA	chromosome	1919579	1920403	PA1775|biofilm	0	+	0
chromosome	1919773	1919783	PA0048_pwm	9.92373	+	2.72e-06	0.0355	CGGCCTGACCA	chromosome	1919579	1920403	PA1775|CDS|cmpX	0	+	0
chromosome	1942713	1942723	PA0048_pwm	9.92373	-	2.72e-06	0.0355	CGGCCTGACCA	chromosome	1942447	1942944	PA1793|CDS|ppiB	0	-	0
chromosome	1956997	1957007	PA0048_pwm	9.92373	+	2.72e-06	0.0355	CGGCCTGACCA	chromosome	1956227	1958623	PA1803|antibiotic resistance	0	+	0
chromosome	1956997	1957007	PA0048_pwm	9.92373	+	2.72e-06	0.0355	CGGCCTGACCA	chromosome	1956227	1958623	PA1803|CDS|lon	0	+	0
chromosome	1956997	1957007	PA0048_pwm	9.92373	+	2.72e-06	0.0355	CGGCCTGACCA	chromosome	1956227	1958623	PA1803|QS	0	+	0
chromosome	2001793	2001803	PA0048_pwm	9.92373	-	2.72e-06	0.0355	CGGCCTGACCA	chromosome	1999889	2003593	PA1843|CDS|metH	0	-	0
chromosome	2052060	2052070	PA0048_pwm	9.92373	-	2.72e-06	0.0355	CGGCCTGACCA	chromosome	2049949	2052144	PA1880|CDS|-	0	-	0
chromosome	2152069	2152079	PA0048_pwm	9.92373	-	2.72e-06	0.0355	CGGCCTGACCA	chromosome	2151755	2153068	PA1971|CDS|braZ	0	-	0
chromosome	2190365	2190375	PA0048_pwm	9.92373	-	2.72e-06	0.0355	CGGCCTGACCA	chromosome	2190084	2190854	PA2003|CDS|bdhA	0	-	0
chromosome	2471557	2471567	PA0048_pwm	9.92373	+	2.72e-06	0.0355	CGGCCTGACCA	chromosome	2471075	2472076	PA2244|biofilm	0	+	0
chromosome	2471557	2471567	PA0048_pwm	9.92373	+	2.72e-06	0.0355	CGGCCTGACCA	chromosome	2471075	2472076	PA2244|CDS|pslN	0	+	0
chromosome	2743501	2743511	PA0048_pwm	9.92373	-	2.72e-06	0.0355	CGGCCTGACCA	chromosome	2742401	2743657	PA2444|CDS|glyA2	0	-	0
chromosome	2978553	2978563	PA0048_pwm	9.92373	+	2.72e-06	0.0355	CGGCCTGACCA	chromosome	2977756	2979351	PA2634|CDS|aceA	0	+	0
chromosome	3052625	3052635	PA0048_pwm	9.92373	+	2.72e-06	0.0355	CGGCCTGACCA	chromosome	3051957	3053795	PA2699|antibiotic resistance	0	+	0
chromosome	3052625	3052635	PA0048_pwm	9.92373	+	2.72e-06	0.0355	CGGCCTGACCA	chromosome	3051957	3053795	PA2699|CDS|-	0	+	0
chromosome	3324479	3324489	PA0048_pwm	9.92373	-	2.72e-06	0.0355	CGGCCTGACCA	chromosome	3323574	3324818	PA2965|CDS|fabF1	0	-	0
chromosome	3373523	3373533	PA0048_pwm	9.92373	-	2.72e-06	0.0355	CGGCCTGACCA	chromosome	3373254	3374429	PA3013|CDS|faoB	0	-	0
chromosome	3749228	3749238	PA0048_pwm	9.92373	+	2.72e-06	0.0355	CGGCCTGACCA	chromosome	3747525	3749711	PA3339|CDS|plpD	0	+	0
chromosome	3816524	3816534	PA0048_pwm	9.92373	+	2.72e-06	0.0355	CGGCCTGACCA	chromosome	3820006	3820272	PA3413|CDS|-	0	+	-3473
chromosome	4458282	4458292	PA0048_pwm	9.92373	+	2.72e-06	0.0355	CGGCCTGACCA	chromosome	4457362	4458645	PA3977|CDS|hemL	0	+	0
chromosome	4628516	4628526	PA0048_pwm	9.92373	-	2.72e-06	0.0355	CGGCCTGACCA	chromosome	4627947	4629185	PA4138|CDS|tyrS	0	-	0
chromosome	4773307	4773317	PA0048_pwm	9.92373	-	2.72e-06	0.0355	CGGCCTGACCA	chromosome	4772279	4776478	PA4269|CDS|rpoC	0	-	0
chromosome	4846255	4846265	PA0048_pwm	9.92373	+	2.72e-06	0.0355	CGGCCTGACCA	chromosome	4845938	4846675	PA4317|CDS|-	0	+	0
chromosome	4862399	4862409	PA0048_pwm	9.92373	+	2.72e-06	0.0355	CGGCCTGACCA	chromosome	4861653	4863176	PA4333|CDS|-	0	+	0
chromosome	4914276	4914286	PA0048_pwm	9.92373	-	2.72e-06	0.0355	CGGCCTGACCA	chromosome	4914127	4914510	PA4383|CDS|-	0	-	0
chromosome	4919326	4919336	PA0048_pwm	9.92373	+	2.72e-06	0.0355	CGGCCTGACCA	chromosome	4919042	4919800	PA4389|CDS|-	0	+	0
chromosome	4947105	4947115	PA0048_pwm	9.92373	-	2.72e-06	0.0355	CGGCCTGACCA	chromosome	4946131	4947330	PA4413|CDS|ftsW	0	-	0
chromosome	5043908	5043918	PA0048_pwm	9.92373	+	2.72e-06	0.0355	CGGCCTGACCA	chromosome	5043090	5044001	PA4504|CDS|dppC	0	+	0
chromosome	5122831	5122841	PA0048_pwm	9.92373	+	2.72e-06	0.0355	CGGCCTGACCA	chromosome	5126166	5126654	PA4578|CDS|-	0	+	-3326
chromosome	5233704	5233714	PA0048_pwm	9.92373	-	2.72e-06	0.0355	CGGCCTGACCA	chromosome	5233585	5234853	PA4666|CDS|hemA	0	-	0
chromosome	5293652	5293662	PA0048_pwm	9.92373	+	2.72e-06	0.0355	CGGCCTGACCA	chromosome	5293257	5293706	PA4714|CDS|-	0	+	0
chromosome	5500272	5500282	PA0048_pwm	9.92373	-	2.72e-06	0.0355	CGGCCTGACCA	chromosome	5498740	5500326	PA4901|CDS|mdlC	0	-	0
chromosome	6091268	6091278	PA0048_pwm	9.92373	+	2.72e-06	0.0355	CGGCCTGACCA	chromosome	6094024	6095277	PA5415|CDS|glyA1	0	+	-2747
chromosome	6094170	6094180	PA0048_pwm	9.92373	+	2.72e-06	0.0355	CGGCCTGACCA	chromosome	6094024	6095277	PA5415|CDS|glyA1	0	+	0
chromosome	6141924	6141934	PA0048_pwm	9.92373	+	2.72e-06	0.0355	CGGCCTGACCA	chromosome	6145399	6147027	PA5455|CDS|-	0	+	-3466
chromosome	6215618	6215628	PA0048_pwm	9.92373	-	2.72e-06	0.0355	CGGCCTGACCA	chromosome	6214434	6215801	PA5522|CDS|pauA6	0	-	0
chromosome	6216873	6216883	PA0048_pwm	9.92373	-	2.72e-06	0.0355	CGGCCTGACCA	chromosome	6215803	6217155	PA5523|CDS|-	0	-	0
chromosome	6223920	6223930	PA0048_pwm	9.92373	+	2.72e-06	0.0355	CGGCCTGACCA	chromosome	6223174	6224481	PA5530|CDS|-	0	+	0
chromosome	6248982	6248992	PA0048_pwm	9.92373	-	2.72e-06	0.0355	CGGCCTGACCA	chromosome	6248278	6249654	PA5554|CDS|atpD	0	-	0
chromosome	154485	154495	PA0048_pwm	9.90678	-	2.89e-06	0.0355	TGGCCAGGCAA	chromosome	151936	153306	PA0134|CDS|-	0	-	-1180
chromosome	3254205	3254215	PA0048_pwm	9.90678	+	2.89e-06	0.0355	TGGCCAGGCAA	chromosome	3261522	3262769	PA2907|CDS|cobL	0	+	-7308
chromosome	4408474	4408484	PA0048_pwm	9.90678	+	2.89e-06	0.0355	TGGCCAGGCAA	chromosome	4407760	4408734	PA3932|CDS|-	0	+	0
chromosome	4970383	4970393	PA0048_pwm	9.90678	+	2.89e-06	0.0355	TGGCCAGGCAA	chromosome	4969770	4970732	PA4437|CDS|-	0	+	0
chromosome	5036724	5036734	PA0048_pwm	9.90678	-	2.89e-06	0.0355	TGGCCAGGCAA	chromosome	5034860	5036077	PA4498|CDS|mdpA	0	-	-648
chromosome	10940	10950	PA0048_pwm	9.89831	-	3.39e-06	0.0355	CGGCCTGGCCG	chromosome	10434	12488	PA0008|CDS|glyS	0	-	0
chromosome	11387	11397	PA0048_pwm	9.89831	-	3.39e-06	0.0355	CGGCCTGGCCG	chromosome	10434	12488	PA0008|CDS|glyS	0	-	0
chromosome	20448	20458	PA0048_pwm	9.89831	-	3.39e-06	0.0355	CGGCCTGGCCG	chromosome	20068	21012	PA0018|CDS|fmt	0	-	0
chromosome	31584	31594	PA0048_pwm	9.89831	-	3.39e-06	0.0355	CGGCCTGGCCG	chromosome	30502	32055	PA0029|CDS|-	0	-	0
chromosome	35025	35035	PA0048_pwm	9.89831	+	3.39e-06	0.0355	CGGCCTGGCCG	chromosome	34624	35538	PA0032|CDS|-	0	+	0
chromosome	67193	67203	PA0048_pwm	9.89831	-	3.39e-06	0.0355	CGGCCTGGCCG	chromosome	63068	64729	PA0049|CDS|-	0	-	-2465
chromosome	83072	83082	PA0048_pwm	9.89831	-	3.39e-06	0.0355	CGGCCTGGCCG	chromosome	82404	83318	PA0070|CDS|tagQ1	0	-	0
chromosome	83072	83082	PA0048_pwm	9.89831	-	3.39e-06	0.0355	CGGCCTGGCCG	chromosome	82404	83318	PA0070|T6SS	0	-	0
chromosome	114454	114464	PA0048_pwm	9.89831	-	3.39e-06	0.0355	CGGCCTGGCCG	chromosome	113303	114595	PA0093|CDS|tse6	0	-	0
chromosome	114454	114464	PA0048_pwm	9.89831	-	3.39e-06	0.0355	CGGCCTGGCCG	chromosome	113303	114595	PA0093|T6SS	0	-	0
chromosome	122418	122428	PA0048_pwm	9.89831	-	3.39e-06	0.0355	CGGCCTGGCCG	chromosome	115046	115298	PA0093_promoter|T6SS	0	-	-7121
chromosome	134040	134050	PA0048_pwm	9.89831	-	3.39e-06	0.0355	CGGCCAGACCA	chromosome	131583	131792	PA0109|CDS|-	0	-	-2249
chromosome	149622	149632	PA0048_pwm	9.89831	-	3.39e-06	0.0355	CGGCCTGGCCG	chromosome	149425	150771	PA0132|CDS|bauA	0	-	0
chromosome	152025	152035	PA0048_pwm	9.89831	-	3.39e-06	0.0355	CGGCCTGGCCG	chromosome	151936	153306	PA0134|CDS|-	0	-	0
chromosome	157707	157717	PA0048_pwm	9.89831	+	3.39e-06	0.0355	CGGCCTGGCCG	chromosome	157108	158034	PA0138|CDS|-	0	+	0
chromosome	196187	196197	PA0048_pwm	9.89831	-	3.39e-06	0.0355	CGGCCTGGCCG	chromosome	194757	196748	PA0172|biofilm	0	-	0
chromosome	196187	196197	PA0048_pwm	9.89831	-	3.39e-06	0.0355	CGGCCTGGCCG	chromosome	194757	196748	PA0172|CDS|siaA	0	-	0
chromosome	216458	216468	PA0048_pwm	9.89831	-	3.39e-06	0.0355	CGGCCAGACCA	chromosome	215550	216908	PA0189|antibiotic resistance	0	-	0
chromosome	216458	216468	PA0048_pwm	9.89831	-	3.39e-06	0.0355	CGGCCAGACCA	chromosome	215550	216908	PA0189|CDS|-	0	-	0
chromosome	225719	225729	PA0048_pwm	9.89831	+	3.39e-06	0.0355	CGGCATGGCCA	chromosome	225603	227039	PA0196|CDS|pntB	0	+	0
chromosome	225719	225729	PA0048_pwm	9.89831	+	3.39e-06	0.0355	CGGCATGGCCA	chromosome	225603	227039	PA0196|siderophore	0	+	0
chromosome	225905	225915	PA0048_pwm	9.89831	+	3.39e-06	0.0355	CGGCCTGGCCG	chromosome	225603	227039	PA0196|CDS|pntB	0	+	0
chromosome	225905	225915	PA0048_pwm	9.89831	+	3.39e-06	0.0355	CGGCCTGGCCG	chromosome	225603	227039	PA0196|siderophore	0	+	0
chromosome	237309	237319	PA0048_pwm	9.89831	+	3.39e-06	0.0355	CGGCCTGGCCG	chromosome	237232	238896	PA0208|CDS|mdcA	0	+	0
chromosome	276962	276972	PA0048_pwm	9.89831	-	3.39e-06	0.0355	CGGCCTGGCCG	chromosome	276480	277334	PA0244|CDS|-	0	-	0
chromosome	299593	299603	PA0048_pwm	9.89831	+	3.39e-06	0.0355	CGGCCAGACCA	chromosome	299522	300973	PA0265|CDS|davD	0	+	0
chromosome	312776	312786	PA0048_pwm	9.89831	-	3.39e-06	0.0355	CGGCCTGGCCG	chromosome	312381	313133	PA0278|CDS|-	0	-	0
chromosome	313005	313015	PA0048_pwm	9.89831	+	3.39e-06	0.0355	CGGCATGGCCA	chromosome	313227	313925	PA0279|CDS|-	0	+	-213
chromosome	329818	329828	PA0048_pwm	9.89831	+	3.39e-06	0.0355	CGGCCAGACCA	chromosome	334534	334734	PA0299_promoter|SR and persisters	0	+	-4707
chromosome	331330	331340	PA0048_pwm	9.89831	-	3.39e-06	0.0355	CGGCCTGGCCG	chromosome	331034	331699	PA0294|CDS|aguR	0	-	0
chromosome	352041	352051	PA0048_pwm	9.89831	+	3.39e-06	0.0355	CGGCCTGGCCG	chromosome	352430	352924	PA0312|CDS|-	0	+	-380
chromosome	391192	391202	PA0048_pwm	9.89831	-	3.39e-06	0.0355	CGGCCTGGCCG	chromosome	389733	390884	PA0347|CDS|glpQ	0	-	-309
chromosome	394350	394360	PA0048_pwm	9.89831	-	3.39e-06	0.0355	CGGCATGGCCA	chromosome	393830	394303	PA0351|CDS|-	0	-	-48
chromosome	404817	404827	PA0048_pwm	9.89831	-	3.39e-06	0.0355	CGGCCTGGCCG	chromosome	404386	406119	PA0361|CDS|-	0	-	0
chromosome	422302	422312	PA0048_pwm	9.89831	+	3.39e-06	0.0355	CGGCCTGGCCG	chromosome	422980	423357	PA0379|CDS|-	0	+	-669
chromosome	426334	426344	PA0048_pwm	9.89831	+	3.39e-06	0.0355	CGGCATGGCCA	chromosome	425504	426850	PA0383|CDS|-	0	+	0
chromosome	432367	432377	PA0048_pwm	9.89831	-	3.39e-06	0.0355	CGGCATGGCCA	chromosome	431858	433825	PA0391|CDS|-	0	-	0
chromosome	464852	464862	PA0048_pwm	9.89831	-	3.39e-06	0.0355	CGGCCTGGCCG	chromosome	464568	465983	PA0418|CDS|-	0	-	0
chromosome	465215	465225	PA0048_pwm	9.89831	-	3.39e-06	0.0355	CGGCCTGGCCG	chromosome	464568	465983	PA0418|CDS|-	0	-	0
chromosome	477496	477506	PA0048_pwm	9.89831	+	3.39e-06	0.0355	CGGCCTGGCCG	chromosome	476333	477790	PA0427|antibiotic resistance	0	+	0
chromosome	477496	477506	PA0048_pwm	9.89831	+	3.39e-06	0.0355	CGGCCTGGCCG	chromosome	476333	477790	PA0427|CDS|oprM	0	+	0
chromosome	494010	494020	PA0048_pwm	9.89831	-	3.39e-06	0.0355	CGGCCTGGCCG	chromosome	493354	494721	PA0440|CDS|-	0	-	0
chromosome	536231	536241	PA0048_pwm	9.89831	-	3.39e-06	0.0355	CGGCCTGGCCG	chromosome	536142	537869	PA0476|CDS|-	0	-	0
chromosome	541390	541400	PA0048_pwm	9.89831	+	3.39e-06	0.0355	CGGCCTGGCCG	chromosome	540839	541636	PA0480|CDS|-	0	+	0
chromosome	550088	550098	PA0048_pwm	9.89831	-	3.39e-06	0.0355	CGGCCTGGCCG	chromosome	549656	550381	PA0489|CDS|-	0	-	0
chromosome	554252	554262	PA0048_pwm	9.89831	+	3.39e-06	0.0355	CGGCATGGCCA	chromosome	553005	554381	PA0494|CDS|-	0	+	0
chromosome	578163	578173	PA0048_pwm	9.89831	+	3.39e-06	0.0355	CGGCCTGGCCG	chromosome	580316	581098	PA0520|CDS|nirQ	0	+	-2144
chromosome	593854	593864	PA0048_pwm	9.89831	+	3.39e-06	0.0355	CGGCCTGGCCG	chromosome	593273	594562	PA0534|CDS|pauB1	0	+	0
chromosome	607842	607852	PA0048_pwm	9.89831	+	3.39e-06	0.0355	CGGCCTGGCCG	chromosome	606160	608157	PA0548|CDS|tktA	0	+	0
chromosome	633706	633716	PA0048_pwm	9.89831	+	3.39e-06	0.0355	CGGCCTGGCCG	chromosome	639316	640341	PA0580|CDS|gcp	0	+	-5601
chromosome	635453	635463	PA0048_pwm	9.89831	-	3.39e-06	0.0355	CGGCCTGGCCG	chromosome	634371	636224	PA0576|CDS|rpoD	0	-	0
chromosome	642822	642832	PA0048_pwm	9.89831	+	3.39e-06	0.0355	CGGCCTGGCCG	chromosome	656654	657670	PA0596|CDS|-	0	+	-13823
chromosome	682782	682792	PA0048_pwm	9.89831	+	3.39e-06	0.0355	CGGCCTGGCCG	chromosome	682567	683070	PA0623|antibiotic resistance	0	+	0
chromosome	682782	682792	PA0048_pwm	9.89831	+	3.39e-06	0.0355	CGGCCTGGCCG	chromosome	682567	683070	PA0623|CDS|-	0	+	0
chromosome	682782	682792	PA0048_pwm	9.89831	+	3.39e-06	0.0355	CGGCCTGGCCG	chromosome	682567	683070	PA0623|siderophore	0	+	0
chromosome	691611	691621	PA0048_pwm	9.89831	-	3.39e-06	0.0355	CGGCCTTGCCA	chromosome	673962	674418	PA0611_promoter|antibiotic resistance	0	-	-17194
chromosome	691611	691621	PA0048_pwm	9.89831	-	3.39e-06	0.0355	CGGCCTTGCCA	chromosome	673962	674418	PA0611_promoter|ROS	0	-	-17194
chromosome	691611	691621	PA0048_pwm	9.89831	-	3.39e-06	0.0355	CGGCCTTGCCA	chromosome	673962	674418	PA0611_promoter|T3SS	0	-	-17194
chromosome	703319	703329	PA0048_pwm	9.89831	+	3.39e-06	0.0355	CGGCCTGGCCG	chromosome	703477	704082	PA0649|CDS|trpG	0	+	-149
chromosome	715471	715481	PA0048_pwm	9.89831	+	3.39e-06	0.0355	CGGCCTGGCCG	chromosome	714977	716011	PA0662|CDS|argC	0	+	0
chromosome	743703	743713	PA0048_pwm	9.89831	+	3.39e-06	0.0355	CGGCCAGACCA	chromosome	741925	744336	PA0685|CDS|hxcQ	0	+	0
chromosome	755176	755186	PA0048_pwm	9.89831	+	3.39e-06	0.0355	CGGCCTGGCCG	chromosome	749957	762499	PA0690|CDS|pdtA	0	+	0
chromosome	820463	820473	PA0048_pwm	9.89831	-	3.39e-06	0.0355	CGGCCTGGCCG	chromosome	819855	821372	PA0752|CDS|-	0	-	0
chromosome	853626	853636	PA0048_pwm	9.89831	+	3.39e-06	0.0355	CGGCCTGGCCG	chromosome	851783	854965	PA0782|CDS|putA	0	+	0
chromosome	859993	860003	PA0048_pwm	9.89831	-	3.39e-06	0.0355	CGGCCTGGCCG	chromosome	856942	857871	PA0784|CDS|-	0	-	-2123
chromosome	862379	862389	PA0048_pwm	9.89831	-	3.39e-06	0.0355	CGGCCTGGCCG	chromosome	860175	863300	PA0788|CDS|-	0	-	0
chromosome	948167	948177	PA0048_pwm	9.89831	+	3.39e-06	0.0355	CGGCCTGGCCG	chromosome	947205	948623	PA0866|CDS|aroP2	0	+	0
chromosome	951153	951163	PA0048_pwm	9.89831	-	3.39e-06	0.0355	CGGCCTGGCCG	chromosome	950962	952161	PA0870|CDS|phhC	0	-	0
chromosome	975207	975217	PA0048_pwm	9.89831	-	3.39e-06	0.0355	CGGCCTGGCCG	chromosome	959484	960380	PA0877|CDS|-	0	-	-14828
chromosome	982630	982640	PA0048_pwm	9.89831	+	3.39e-06	0.0355	CGGCCTGGCCG	chromosome	981422	982888	PA0898|CDS|aruD	0	+	0
chromosome	988239	988249	PA0048_pwm	9.89831	-	3.39e-06	0.0355	CGGCCTGGCCG	chromosome	977420	977743	PA0894|CDS|-	0	-	-10497
chromosome	994069	994079	PA0048_pwm	9.89831	+	3.39e-06	0.0355	CGGCCTGGCCG	chromosome	994143	994646	PA0910|CDS|alpD	0	+	-65
chromosome	1087639	1087649	PA0048_pwm	9.89831	-	3.39e-06	0.0355	CGGCCTGGCCG	chromosome	1087096	1087842	PA1003_promoter|biofilm	0	-	0
chromosome	1087639	1087649	PA0048_pwm	9.89831	-	3.39e-06	0.0355	CGGCCTGGCCG	chromosome	1087096	1087842	PA1003_promoter|QS	0	-	0
chromosome	1087639	1087649	PA0048_pwm	9.89831	-	3.39e-06	0.0355	CGGCCTGGCCG	chromosome	1087096	1087842	PA1003_promoter|T6SS	0	-	0
chromosome	1107518	1107528	PA0048_pwm	9.89831	+	3.39e-06	0.0355	CGGCCTGGCCG	chromosome	1107000	1107761	PA1021|CDS|-	0	+	0
chromosome	1148140	1148150	PA0048_pwm	9.89831	+	3.39e-06	0.0355	CGGCCTGGCCG	chromosome	1147928	1148833	PA1060|CDS|-	0	+	0
chromosome	1160264	1160274	PA0048_pwm	9.89831	-	3.39e-06	0.0355	CGGCCTGGCCG	chromosome	1159422	1160675	PA1072|CDS|braE	0	-	0
chromosome	1171235	1171245	PA0048_pwm	9.89831	+	3.39e-06	0.0355	CGGCCTGGCCG	chromosome	1170942	1172144	PA1085|CDS|flgJ	0	+	0
chromosome	1171235	1171245	PA0048_pwm	9.89831	+	3.39e-06	0.0355	CGGCCTGGCCG	chromosome	1170942	1172144	PA1085|motility	0	+	0
chromosome	1193496	1193506	PA0048_pwm	9.89831	+	3.39e-06	0.0355	CGGCCAGACCA	chromosome	1192405	1194201	PA1101|CDS|fliF	0	+	0
chromosome	1193496	1193506	PA0048_pwm	9.89831	+	3.39e-06	0.0355	CGGCCAGACCA	chromosome	1192405	1194201	PA1101|motility	0	+	0
chromosome	1200672	1200682	PA0048_pwm	9.89831	-	3.39e-06	0.0355	CGGCCTGGCCG	chromosome	1200063	1201220	PA1108|CDS|-	0	-	0
chromosome	1205998	1206008	PA0048_pwm	9.89831	+	3.39e-06	0.0355	CGGCCTGGCCG	chromosome	1205771	1207537	PA1113|CDS|-	0	+	0
chromosome	1223573	1223583	PA0048_pwm	9.89831	+	3.39e-06	0.0355	CGGCCAGACCA	chromosome	1224641	1225330	PA1132|CDS|-	0	+	-1059
chromosome	1266440	1266450	PA0048_pwm	9.89831	-	3.39e-06	0.0355	CGGCCTGGCCG	chromosome	1265147	1265935	PA1166|CDS|-	0	-	-506
chromosome	1279600	1279610	PA0048_pwm	9.89831	+	3.39e-06	0.0355	CGGCCTGGCCG	chromosome	1278362	1279708	PA1180|CDS|phoQ	0	+	0
chromosome	1301708	1301718	PA0048_pwm	9.89831	-	3.39e-06	0.0355	CGGCCAGACCA	chromosome	1301481	1302395	PA1201|CDS|-	0	-	0
chromosome	1312210	1312220	PA0048_pwm	9.89831	-	3.39e-06	0.0355	CGGCCTGGCCG	chromosome	1312136	1313365	PA1212|CDS|-	0	-	0
chromosome	1313255	1313265	PA0048_pwm	9.89831	+	3.39e-06	0.0355	CGGCCAGACCA	chromosome	1327024	1327803	PA1224|CDS|-	0	+	-13760
chromosome	1328286	1328296	PA0048_pwm	9.89831	-	3.39e-06	0.0355	CGGCCTGGCCG	chromosome	1327813	1328439	PA1225|CDS|-	0	-	0
chromosome	1376043	1376053	PA0048_pwm	9.89831	-	3.39e-06	0.0355	CGGCCTGGCCG	chromosome	1374844	1376097	PA1266|CDS|lhpE	0	-	0
chromosome	1387835	1387845	PA0048_pwm	9.89831	+	3.39e-06	0.0355	CGGCCTGGCCG	chromosome	1387254	1388249	PA1276|CDS|cobC	0	+	0
chromosome	1392109	1392119	PA0048_pwm	9.89831	+	3.39e-06	0.0355	CGGCCTGGCCG	chromosome	1391864	1392601	PA1281|CDS|cobV	0	+	0
chromosome	1392445	1392455	PA0048_pwm	9.89831	+	3.39e-06	0.0355	CGGCCTGGCCG	chromosome	1391864	1392601	PA1281|CDS|cobV	0	+	0
chromosome	1426588	1426598	PA0048_pwm	9.89831	+	3.39e-06	0.0355	CGGCCTGGCCG	chromosome	1425912	1427453	PA1316|CDS|-	0	+	0
chromosome	1429422	1429432	PA0048_pwm	9.89831	-	3.39e-06	0.0355	CGGCATGGCCA	chromosome	1425755	1425911	PA1315_promoter|siderophore	0	-	-3512
chromosome	1447393	1447403	PA0048_pwm	9.89831	+	3.39e-06	0.0355	CGGCCTGGCCG	chromosome	1457175	1457633	PA1343|CDS|-	0	+	-9773
chromosome	1467182	1467192	PA0048_pwm	9.89831	+	3.39e-06	0.0355	CGGCCTGGCCG	chromosome	1468510	1468890	PA1355|CDS|-	0	+	-1319
chromosome	1517793	1517803	PA0048_pwm	9.89831	-	3.39e-06	0.0355	CGGCCTGGCCG	chromosome	1517146	1518768	PA1396|CDS|-	0	-	0
chromosome	1523205	1523215	PA0048_pwm	9.89831	+	3.39e-06	0.0355	CGGCCTGGCCG	chromosome	1521109	1524396	PA1400|CDS|-	0	+	0
chromosome	1524327	1524337	PA0048_pwm	9.89831	+	3.39e-06	0.0355	CGGCCTGGCCG	chromosome	1521109	1524396	PA1400|CDS|-	0	+	0
chromosome	1544429	1544439	PA0048_pwm	9.89831	-	3.39e-06	0.0355	CGGCCTGGCCG	chromosome	1544307	1545818	PA1419|CDS|-	0	-	0
chromosome	1600355	1600365	PA0048_pwm	9.89831	+	3.39e-06	0.0355	CGGCCTGGCCG	chromosome	1602179	1602880	PA1475|CDS|ccmA	0	+	-1815
chromosome	1622147	1622157	PA0048_pwm	9.89831	+	3.39e-06	0.0355	CGGCATGGCCA	chromosome	1633006	1633437	PA1503|CDS|-	0	+	-10850
chromosome	1631423	1631433	PA0048_pwm	9.89831	+	3.39e-06	0.0355	CGGCCTGGCCG	chromosome	1633006	1633437	PA1503|CDS|-	0	+	-1574
chromosome	1664072	1664082	PA0048_pwm	9.89831	-	3.39e-06	0.0355	CGGCCTGGCCG	chromosome	1659413	1660546	PA1525|CDS|alkB2	0	-	-3527
chromosome	1666414	1666424	PA0048_pwm	9.89831	+	3.39e-06	0.0355	CGGCCTGGCCG	chromosome	1666025	1668409	PA1529|CDS|lig	0	+	0
chromosome	1671641	1671651	PA0048_pwm	9.89831	+	3.39e-06	0.0355	CGGCCTGGCCG	chromosome	1669989	1672034	PA1532|CDS|dnaX	0	+	0
chromosome	1681199	1681209	PA0048_pwm	9.89831	-	3.39e-06	0.0355	CGGCCTGGCCG	chromosome	1681071	1681805	PA1544|antibiotic resistance	0	-	0
chromosome	1681199	1681209	PA0048_pwm	9.89831	-	3.39e-06	0.0355	CGGCCTGGCCG	chromosome	1681071	1681805	PA1544|biofilm	0	-	0
chromosome	1681199	1681209	PA0048_pwm	9.89831	-	3.39e-06	0.0355	CGGCCTGGCCG	chromosome	1681071	1681805	PA1544|CDS|anr	0	-	0
chromosome	1681199	1681209	PA0048_pwm	9.89831	-	3.39e-06	0.0355	CGGCCTGGCCG	chromosome	1681071	1681805	PA1544|QS	0	-	0
chromosome	1684550	1684560	PA0048_pwm	9.89831	-	3.39e-06	0.0355	CGGCCTGGCCG	chromosome	1684077	1684760	PA1547|CDS|-	0	-	0
chromosome	1685615	1685625	PA0048_pwm	9.89831	+	3.39e-06	0.0355	CGGCCTGGCCG	chromosome	1696467	1697099	PA1558|CDS|-	0	+	-10843
chromosome	1688754	1688764	PA0048_pwm	9.89831	+	3.39e-06	0.0355	CGGCCTGGCCG	chromosome	1696467	1697099	PA1558|CDS|-	0	+	-7704
chromosome	1699380	1699390	PA0048_pwm	9.89831	-	3.39e-06	0.0355	CGGCCTGGCCG	chromosome	1698382	1699947	PA1561|CDS|aer	0	-	0
chromosome	1702173	1702183	PA0048_pwm	9.89831	-	3.39e-06	0.0355	CGGCCTGGCCG	chromosome	1700320	1703052	PA1562|CDS|acnA	0	-	0
chromosome	1717912	1717922	PA0048_pwm	9.89831	+	3.39e-06	0.0355	CGGCCTGGCCG	chromosome	1718386	1718994	PA1579|CDS|-	0	+	-465
chromosome	1735675	1735685	PA0048_pwm	9.89831	-	3.39e-06	0.0355	CGGCCTGGCCG	chromosome	1734827	1735063	PA1592|CDS|-	0	-	-613
chromosome	1759341	1759351	PA0048_pwm	9.89831	+	3.39e-06	0.0355	CGGCCTGGCCG	chromosome	1758748	1759770	PA1614|CDS|gpsA	0	+	0
chromosome	1761113	1761123	PA0048_pwm	9.89831	-	3.39e-06	0.0355	CGGCATGGCCA	chromosome	1756489	1758597	PA1613|CDS|-	0	-	-2517
chromosome	1779367	1779377	PA0048_pwm	9.89831	+	3.39e-06	0.0355	CGGCATGGCCA	chromosome	1777751	1779823	PA1634|antibiotic resistance	0	+	0
chromosome	1779367	1779377	PA0048_pwm	9.89831	+	3.39e-06	0.0355	CGGCATGGCCA	chromosome	1777751	1779823	PA1634|CDS|kdpB	0	+	0
chromosome	1787693	1787703	PA0048_pwm	9.89831	+	3.39e-06	0.0355	CGGCCTGGCCG	chromosome	1787250	1788284	PA1642|CDS|selD	0	+	0
chromosome	1826282	1826292	PA0048_pwm	9.89831	+	3.39e-06	0.0355	CGGCCTTGCCA	chromosome	1827992	1828906	PA1678|CDS|-	0	+	-1701
chromosome	1837681	1837691	PA0048_pwm	9.89831	+	3.39e-06	0.0355	CGGCATGGCCA	chromosome	1837388	1838257	PA1688|CDS|-	0	+	0
chromosome	1868157	1868167	PA0048_pwm	9.89831	-	3.39e-06	0.0355	CGGCCTGGCCG	chromosome	1866241	1868535	PA1726|CDS|bglX	0	-	0
chromosome	1874156	1874166	PA0048_pwm	9.89831	-	3.39e-06	0.0355	CGGCATGGCCA	chromosome	1870764	1871115	PA1727_promoter|biofilm	0	-	-3042
chromosome	1886604	1886614	PA0048_pwm	9.89831	-	3.39e-06	0.0355	CGGCCTTGCCA	chromosome	1885662	1886033	PA1741|CDS|-	0	-	-572
chromosome	1920169	1920179	PA0048_pwm	9.89831	+	3.39e-06	0.0355	CGGCCTGGCCG	chromosome	1919579	1920403	PA1775|biofilm	0	+	0
chromosome	1920169	1920179	PA0048_pwm	9.89831	+	3.39e-06	0.0355	CGGCCTGGCCG	chromosome	1919579	1920403	PA1775|CDS|cmpX	0	+	0
chromosome	1931295	1931305	PA0048_pwm	9.89831	-	3.39e-06	0.0355	CGGCCTGGCCG	chromosome	1930564	1931775	PA1783|CDS|nasA	0	-	0
chromosome	1969408	1969418	PA0048_pwm	9.89831	-	3.39e-06	0.0355	CGGCCTGGCCG	chromosome	1967615	1969444	PA1811|CDS|nppA1	0	-	0
chromosome	1973985	1973995	PA0048_pwm	9.89831	+	3.39e-06	0.0355	CGGCCAGACCA	chromosome	1973470	1974210	PA1816|CDS|dnaQ	0	+	0
chromosome	1991372	1991382	PA0048_pwm	9.89831	+	3.39e-06	0.0355	CGGCCTGGCCG	chromosome	1990428	1991453	PA1832|CDS|-	0	+	0
chromosome	2002099	2002109	PA0048_pwm	9.89831	+	3.39e-06	0.0355	CGGCCTGGCCG	chromosome	2005254	2007542	PA1846|CDS|cti	0	+	-3146
chromosome	2005571	2005581	PA0048_pwm	9.89831	-	3.39e-06	0.0355	CGGCCTGGCCG	chromosome	2004893	2005253	PA1844_promoter|T6SS	0	-	-319
chromosome	2008371	2008381	PA0048_pwm	9.89831	+	3.39e-06	0.0355	CGGCCAGACCA	chromosome	2011000	2012205	PA1851|CDS|-	0	+	-2620
chromosome	2011289	2011299	PA0048_pwm	9.89831	-	3.39e-06	0.0355	CGGCCAGACCA	chromosome	2009747	2010751	PA1850|CDS|-	0	-	-539
chromosome	2012735	2012745	PA0048_pwm	9.89831	-	3.39e-06	0.0355	CGGCCTGGCCG	chromosome	2012255	2012530	PA1852|CDS|-	0	-	-206
chromosome	2014368	2014378	PA0048_pwm	9.89831	+	3.39e-06	0.0355	CGGCCAGACCA	chromosome	2019776	2020603	PA1860|CDS|-	0	+	-5399
chromosome	2016444	2016454	PA0048_pwm	9.89831	+	3.39e-06	0.0355	CGGCCAGACCA	chromosome	2019776	2020603	PA1860|CDS|-	0	+	-3323
chromosome	2023403	2023413	PA0048_pwm	9.89831	+	3.39e-06	0.0355	CGGCCTGGCCG	chromosome	2024065	2025744	PA1865|CDS|-	0	+	-653
chromosome	2036989	2036999	PA0048_pwm	9.89831	-	3.39e-06	0.0355	CGGCCTGGCCG	chromosome	2034918	2035940	PA1873|CDS|-	0	-	-1050
chromosome	2037808	2037818	PA0048_pwm	9.89831	+	3.39e-06	0.0355	CGGCCAGACCA	chromosome	2036441	2043847	PA1874|CDS|-	0	+	0
chromosome	2038054	2038064	PA0048_pwm	9.89831	+	3.39e-06	0.0355	CGGCCAGACCA	chromosome	2036441	2043847	PA1874|CDS|-	0	+	0
chromosome	2040514	2040524	PA0048_pwm	9.89831	+	3.39e-06	0.0355	CGGCCAGACCA	chromosome	2036441	2043847	PA1874|CDS|-	0	+	0
chromosome	2061559	2061569	PA0048_pwm	9.89831	-	3.39e-06	0.0355	CGGCCTGGCCG	chromosome	2061278	2061667	PA1891|CDS|-	0	-	0
chromosome	2062898	2062908	PA0048_pwm	9.89831	+	3.39e-06	0.0355	CGGCCTGGCCG	chromosome	2068729	2069489	PA1898_promoter|QS	0	+	-5822
chromosome	2067349	2067359	PA0048_pwm	9.89831	-	3.39e-06	0.0355	CGGCCTGGCCG	chromosome	2066786	2067955	PA1896|CDS|-	0	-	0
chromosome	2073686	2073696	PA0048_pwm	9.89831	+	3.39e-06	0.0355	CGGCCTGGCCG	chromosome	2073555	2075438	PA1903|antibiotic resistance	0	+	0
chromosome	2073686	2073696	PA0048_pwm	9.89831	+	3.39e-06	0.0355	CGGCCTGGCCG	chromosome	2073555	2075438	PA1903|CDS|phzE2	0	+	0
chromosome	2073686	2073696	PA0048_pwm	9.89831	+	3.39e-06	0.0355	CGGCCTGGCCG	chromosome	2073555	2075438	PA1903|QS	0	+	0
chromosome	2123289	2123299	PA0048_pwm	9.89831	-	3.39e-06	0.0355	CGGCATGGCCA	chromosome	2122579	2123718	PA1940|CDS|-	0	-	0
chromosome	2133474	2133484	PA0048_pwm	9.89831	+	3.39e-06	0.0355	CGGCCTGGCCG	chromosome	2133391	2134389	PA1948|CDS|rbsC	0	+	0
chromosome	2136287	2136297	PA0048_pwm	9.89831	-	3.39e-06	0.0355	CGGCCTGGCCG	chromosome	2126396	2127493	PA1943|CDS|-	0	-	-8795
chromosome	2180117	2180127	PA0048_pwm	9.89831	-	3.39e-06	0.0355	CGGCCTGGCCG	chromosome	2179848	2181056	PA1993|CDS|-	0	-	0
chromosome	2191478	2191488	PA0048_pwm	9.89831	-	3.39e-06	0.0355	CGGCATGGCCA	chromosome	2190891	2192282	PA2004|CDS|-	0	-	0
chromosome	2243366	2243376	PA0048_pwm	9.89831	-	3.39e-06	0.0355	CGGCCTGGCCG	chromosome	2242170	2243603	PA2049|CDS|-	0	-	0
chromosome	2282536	2282546	PA0048_pwm	9.89831	-	3.39e-06	0.0355	CGGCCTGGCCG	chromosome	2279917	2281578	PA2075|CDS|-	0	-	-959
chromosome	2284280	2284290	PA0048_pwm	9.89831	-	3.39e-06	0.0355	CGGCCTGGCCG	chromosome	2283419	2285323	PA2077|CDS|-	0	-	0
chromosome	2286224	2286234	PA0048_pwm	9.89831	-	3.39e-06	0.0355	CGGCCTGGCCG	chromosome	2285363	2287237	PA2078|CDS|-	0	-	0
chromosome	2286224	2286234	PA0048_pwm	9.89831	-	3.39e-06	0.0355	CGGCCTGGCCG	chromosome	2285363	2287237	PA2078|ROS	0	-	0
chromosome	2353678	2353688	PA0048_pwm	9.89831	-	3.39e-06	0.0355	CGGCCTGGCCG	chromosome	2351906	2352430	PA2136|CDS|-	0	-	-1249
chromosome	2376732	2376742	PA0048_pwm	9.89831	+	3.39e-06	0.0355	CGGCCTGGCCG	chromosome	2390255	2390620	PA2166|CDS|-	0	+	-13514
chromosome	2381700	2381710	PA0048_pwm	9.89831	+	3.39e-06	0.0355	CGGCCTGGCCG	chromosome	2390255	2390620	PA2166|CDS|-	0	+	-8546
chromosome	2383604	2383614	PA0048_pwm	9.89831	-	3.39e-06	0.0355	CGGCCTGGCCG	chromosome	2381775	2384555	PA2162|CDS|-	0	-	0
chromosome	2385876	2385886	PA0048_pwm	9.89831	-	3.39e-06	0.0355	CGGCCTGGCCG	chromosome	2384548	2386602	PA2163|CDS|-	0	-	0
chromosome	2386912	2386922	PA0048_pwm	9.89831	-	3.39e-06	0.0355	CGGCCTGGCCG	chromosome	2386595	2388346	PA2164|CDS|-	0	-	0
chromosome	2398330	2398340	PA0048_pwm	9.89831	+	3.39e-06	0.0355	CGGCCTGGCCG	chromosome	2397569	2399668	PA2177|CDS|-	0	+	0
chromosome	2422180	2422190	PA0048_pwm	9.89831	-	3.39e-06	0.0355	CGGCCTGGCCG	chromosome	2422022	2422738	PA2203|CDS|-	0	-	0
chromosome	2430844	2430854	PA0048_pwm	9.89831	-	3.39e-06	0.0355	CGGCCTGGCCG	chromosome	2427572	2428669	PA2209|CDS|-	0	-	-2176
chromosome	2452396	2452406	PA0048_pwm	9.89831	-	3.39e-06	0.0355	CGGCCTGGCCG	chromosome	2450766	2451706	PA2226_promoter|QS	0	-	-691
chromosome	2452396	2452406	PA0048_pwm	9.89831	-	3.39e-06	0.0355	CGGCCTGGCCG	chromosome	2450766	2451706	PA2227_promoter|antibiotic resistance	0	-	-691
chromosome	2452396	2452406	PA0048_pwm	9.89831	-	3.39e-06	0.0355	CGGCCTGGCCG	chromosome	2450766	2451706	PA2227_promoter|QS	0	-	-691
chromosome	2452396	2452406	PA0048_pwm	9.89831	-	3.39e-06	0.0355	CGGCCTGGCCG	chromosome	2450766	2451706	PA2227_promoter|T3SS	0	-	-691
chromosome	2470605	2470615	PA0048_pwm	9.89831	+	3.39e-06	0.0355	CGGCCTGGCCG	chromosome	2469286	2471019	PA2243|biofilm	0	+	0
chromosome	2470605	2470615	PA0048_pwm	9.89831	+	3.39e-06	0.0355	CGGCCTGGCCG	chromosome	2469286	2471019	PA2243|CDS|pslM	0	+	0
chromosome	2479445	2479455	PA0048_pwm	9.89831	-	3.39e-06	0.0355	CGGCCTGGCCG	chromosome	2478312	2479130	PA2251|CDS|-	0	-	-316
chromosome	2545858	2545868	PA0048_pwm	9.89831	-	3.39e-06	0.0355	CGGCCTGGCCG	chromosome	2545769	2546635	PA2307|CDS|-	0	-	0
chromosome	2545858	2545868	PA0048_pwm	9.89831	-	3.39e-06	0.0355	CGGCCTGGCCG	chromosome	2545769	2546635	PA2307|siderophore	0	-	0
chromosome	2548338	2548348	PA0048_pwm	9.89831	+	3.39e-06	0.0355	CGGCCTGGCCG	chromosome	2549748	2549906	PA2311|CDS|-	0	+	-1401
chromosome	2553697	2553707	PA0048_pwm	9.89831	-	3.39e-06	0.0355	CGGCCTGGCCG	chromosome	2552675	2553850	PA2315|CDS|-	0	-	0
chromosome	2572059	2572069	PA0048_pwm	9.89831	-	3.39e-06	0.0355	CGGCATGGCCA	chromosome	2571688	2572755	PA2330|CDS|-	0	-	0
chromosome	2599832	2599842	PA0048_pwm	9.89831	+	3.39e-06	0.0355	CGGCCTGGCCG	chromosome	2614685	2614892	PA2367_promoter|T6SS	0	+	-14844
chromosome	2599832	2599842	PA0048_pwm	9.89831	+	3.39e-06	0.0355	CGGCCTGGCCG	chromosome	2614685	2614892	PA2371_promoter|T6SS	0	+	-14844
chromosome	2616549	2616559	PA0048_pwm	9.89831	+	3.39e-06	0.0355	CGGCCAGACCA	chromosome	2615461	2616945	PA2366|CDS|hsiC3	0	+	0
chromosome	2634736	2634746	PA0048_pwm	9.89831	+	3.39e-06	0.0355	CGGCATGGCCA	chromosome	2640872	2641034	PA2388_promoter|siderophore	0	+	-6127
chromosome	2638772	2638782	PA0048_pwm	9.89831	-	3.39e-06	0.0355	CGGCCTGGCCG	chromosome	2636517	2638805	PA2385|CDS|pvdQ	0	-	0
chromosome	2638772	2638782	PA0048_pwm	9.89831	-	3.39e-06	0.0355	CGGCCTGGCCG	chromosome	2636517	2638805	PA2385|siderophore	0	-	0
chromosome	2645105	2645115	PA0048_pwm	9.89831	+	3.39e-06	0.0355	CGGCCTGGCCG	chromosome	2643306	2645297	PA2390|CDS|pvdT	0	+	0
chromosome	2645105	2645115	PA0048_pwm	9.89831	+	3.39e-06	0.0355	CGGCCTGGCCG	chromosome	2643306	2645297	PA2390|siderophore	0	+	0
chromosome	2645383	2645393	PA0048_pwm	9.89831	+	3.39e-06	0.0355	CGGCCTGGCCG	chromosome	2645303	2646727	PA2391|CDS|opmQ	0	+	0
chromosome	2645383	2645393	PA0048_pwm	9.89831	+	3.39e-06	0.0355	CGGCCTGGCCG	chromosome	2645303	2646727	PA2391|siderophore	0	+	0
chromosome	2653533	2653543	PA0048_pwm	9.89831	+	3.39e-06	0.0355	CGGCCTTGCCA	chromosome	2653435	2655084	PA2397|CDS|pvdE	0	+	0
chromosome	2653533	2653543	PA0048_pwm	9.89831	+	3.39e-06	0.0355	CGGCCTTGCCA	chromosome	2653435	2655084	PA2397|siderophore	0	+	0
chromosome	2705084	2705094	PA0048_pwm	9.89831	+	3.39e-06	0.0355	CGGCCTGGCCG	chromosome	2704377	2705297	PA2421|CDS|-	0	+	0
chromosome	2706112	2706122	PA0048_pwm	9.89831	+	3.39e-06	0.0355	CGGCCTGGCCG	chromosome	2706387	2707181	PA2423|CDS|-	0	+	-266
chromosome	2730038	2730048	PA0048_pwm	9.89831	-	3.39e-06	0.0355	CGGCCTGGCCG	chromosome	2729976	2730521	PA2434|CDS|-	0	-	0
chromosome	2730368	2730378	PA0048_pwm	9.89831	+	3.39e-06	0.0355	CGGCCTGGCCG	chromosome	2737882	2738844	PA2440|CDS|-	0	+	-7505
chromosome	2735697	2735707	PA0048_pwm	9.89831	+	3.39e-06	0.0355	CGGCCTGGCCG	chromosome	2737882	2738844	PA2440|CDS|-	0	+	-2176
chromosome	2737223	2737233	PA0048_pwm	9.89831	-	3.39e-06	0.0355	CGGCCTGGCCG	chromosome	2735194	2737194	PA2439|CDS|-	0	-	-30
chromosome	2798600	2798610	PA0048_pwm	9.89831	+	3.39e-06	0.0355	CGGCCAGACCA	chromosome	2798412	2799734	PA2480|CDS|-	0	+	0
chromosome	2817472	2817482	PA0048_pwm	9.89831	-	3.39e-06	0.0355	CGGCCTGGCCG	chromosome	2815341	2816219	PA2497|CDS|-	0	-	-1254
chromosome	2826710	2826720	PA0048_pwm	9.89831	-	3.39e-06	0.0355	CGGCCTGGCCG	chromosome	2825958	2827079	PA2509|CDS|catB	0	-	0
chromosome	2826710	2826720	PA0048_pwm	9.89831	-	3.39e-06	0.0355	CGGCCTGGCCG	chromosome	2825958	2827079	PA2509|QS	0	-	0
chromosome	2834959	2834969	PA0048_pwm	9.89831	-	3.39e-06	0.0355	CGGCATGGCCA	chromosome	2834687	2836054	PA2518|CDS|xylX	0	-	0
chromosome	2859884	2859894	PA0048_pwm	9.89831	-	3.39e-06	0.0355	CGGCCTGGCCG	chromosome	2859777	2860274	PA2532|CDS|tpx	0	-	0
chromosome	2862072	2862082	PA0048_pwm	9.89831	-	3.39e-06	0.0355	CGGCCTGGCCG	chromosome	2861914	2862825	PA2534|CDS|-	0	-	0
chromosome	2876008	2876018	PA0048_pwm	9.89831	-	3.39e-06	0.0355	CGGCCTGGCCG	chromosome	2875697	2876410	PA2544|CDS|-	0	-	0
chromosome	2878598	2878608	PA0048_pwm	9.89831	-	3.39e-06	0.0355	CGGCATGGCCA	chromosome	2877477	2877908	PA2546|CDS|-	0	-	-691
chromosome	2882305	2882315	PA0048_pwm	9.89831	+	3.39e-06	0.0355	CGGCATGGCCA	chromosome	2883157	2884089	PA2551|CDS|-	0	+	-843
chromosome	2886860	2886870	PA0048_pwm	9.89831	+	3.39e-06	0.0355	CGGCCTGGCCG	chromosome	2892271	2892963	PA2558|CDS|-	0	+	-5402
chromosome	2892360	2892370	PA0048_pwm	9.89831	+	3.39e-06	0.0355	CGGCATGGCCA	chromosome	2892271	2892963	PA2558|CDS|-	0	+	0
chromosome	2926333	2926343	PA0048_pwm	9.89831	+	3.39e-06	0.0355	CGGCCTGGCCG	chromosome	2927922	2928538	PA2588_promoter|QS	0	+	-1580
chromosome	2942037	2942047	PA0048_pwm	9.89831	+	3.39e-06	0.0355	CGGCCTGGCCG	chromosome	2945264	2945869	PA2602|CDS|-	0	+	-3218
chromosome	2953526	2953536	PA0048_pwm	9.89831	-	3.39e-06	0.0355	CGGCCTGGCCG	chromosome	2953416	2954696	PA2612|CDS|serS	0	-	0
chromosome	3030540	3030550	PA0048_pwm	9.89831	-	3.39e-06	0.0355	CGGCCTGGCCG	chromosome	3030436	3031398	PA2683|CDS|-	0	-	0
chromosome	3035597	3035607	PA0048_pwm	9.89831	-	3.39e-06	0.0355	CGGCCTGGCCG	chromosome	3031749	3035702	PA2684|CDS|tse5	0	-	0
chromosome	3035597	3035607	PA0048_pwm	9.89831	-	3.39e-06	0.0355	CGGCCTGGCCG	chromosome	3031749	3035702	PA2684|T6SS	0	-	0
chromosome	3042900	3042910	PA0048_pwm	9.89831	-	3.39e-06	0.0355	CGGCCTGGCCG	chromosome	3037933	3038132	PA2685_promoter|T6SS	0	-	-4769
chromosome	3054137	3054147	PA0048_pwm	9.89831	-	3.39e-06	0.0355	CGGCATGGCCA	chromosome	3050669	3051349	PA2698|CDS|-	0	-	-2789
chromosome	3066727	3066737	PA0048_pwm	9.89831	+	3.39e-06	0.0355	CGGCCTGGCCG	chromosome	3066296	3067159	PA2712|CDS|-	0	+	0
chromosome	3071480	3071490	PA0048_pwm	9.89831	-	3.39e-06	0.0355	CGGCCTGGCCG	chromosome	3070719	3071954	PA2716|CDS|-	0	-	0
chromosome	3083943	3083953	PA0048_pwm	9.89831	+	3.39e-06	0.0355	CGGCCTGGCCG	chromosome	3083485	3086145	PA2728|CDS|-	0	+	0
chromosome	3134861	3134871	PA0048_pwm	9.89831	-	3.39e-06	0.0355	CGGCCTGGCCG	chromosome	3133449	3133525	PA2775.1|tRNA|tRNA-Val	0	-	-1337
chromosome	3143322	3143332	PA0048_pwm	9.89831	-	3.39e-06	0.0355	CGGCCTGGCCG	chromosome	3137044	3137442	PA2779|CDS|-	0	-	-5881
chromosome	3145899	3145909	PA0048_pwm	9.89831	-	3.39e-06	0.0355	CGGCCTGGCCG	chromosome	3144412	3146007	PA2788|CDS|-	0	-	0
chromosome	3157216	3157226	PA0048_pwm	9.89831	-	3.39e-06	0.0355	CGGCCTGGCCG	chromosome	3156860	3157564	PA2800|antibiotic resistance	0	-	0
chromosome	3157216	3157226	PA0048_pwm	9.89831	-	3.39e-06	0.0355	CGGCCTGGCCG	chromosome	3156860	3157564	PA2800|CDS|vacJ	0	-	0
chromosome	3159465	3159475	PA0048_pwm	9.89831	+	3.39e-06	0.0355	CGGCCTGGCCG	chromosome	3158926	3159669	PA2803|CDS|-	0	+	0
chromosome	3167662	3167672	PA0048_pwm	9.89831	-	3.39e-06	0.0355	CGGCCTGGCCG	chromosome	3167282	3167953	PA2814|CDS|-	0	-	0
chromosome	3183786	3183796	PA0048_pwm	9.89831	+	3.39e-06	0.0355	CGGCCTGGCCG	chromosome	3182986	3183861	PA2830|CDS|htpX	0	+	0
chromosome	3225670	3225680	PA0048_pwm	9.89831	+	3.39e-06	0.0355	CGGCCTTGCCA	chromosome	3231218	3231859	PA2878|CDS|-	0	+	-5539
chromosome	3239749	3239759	PA0048_pwm	9.89831	+	3.39e-06	0.0355	CGGCCAGACCA	chromosome	3239711	3240589	PA2887|CDS|atuB	0	+	0
chromosome	3245790	3245800	PA0048_pwm	9.89831	+	3.39e-06	0.0355	CGGCCTGGCCG	chromosome	3244345	3246330	PA2891|CDS|atuF	0	+	0
chromosome	3251178	3251188	PA0048_pwm	9.89831	-	3.39e-06	0.0355	CGGCCTGGCCG	chromosome	3250738	3251322	PA2896|CDS|sbrI	0	-	0
chromosome	3257655	3257665	PA0048_pwm	9.89831	-	3.39e-06	0.0355	CGGCCTGGCCG	chromosome	3256681	3258360	PA2903|CDS|cobJ	0	-	0
chromosome	3272301	3272311	PA0048_pwm	9.89831	-	3.39e-06	0.0355	CGGCCTGGCCG	chromosome	3271813	3272406	PA2916|CDS|-	0	-	0
chromosome	3274235	3274245	PA0048_pwm	9.89831	+	3.39e-06	0.0355	CGGCCAGACCA	chromosome	3273504	3274277	PA2918|CDS|-	0	+	0
chromosome	3278245	3278255	PA0048_pwm	9.89831	-	3.39e-06	0.0355	CGGCCTGGCCG	chromosome	3276319	3277308	PA2921|CDS|-	0	-	-938
chromosome	3293706	3293716	PA0048_pwm	9.89831	+	3.39e-06	0.0355	CGGCCTGGCCG	chromosome	3294282	3295892	PA2939|CDS|-	0	+	-567
chromosome	3306959	3306969	PA0048_pwm	9.89831	+	3.39e-06	0.0355	CGGCCTGGCCG	chromosome	3305919	3307013	PA2946|CDS|-	0	+	0
chromosome	3334362	3334372	PA0048_pwm	9.89831	+	3.39e-06	0.0355	CGGCCAGACCA	chromosome	3332881	3336054	PA2976|CDS|rne	0	+	0
chromosome	3340323	3340333	PA0048_pwm	9.89831	-	3.39e-06	0.0355	CGGCATGGCCA	chromosome	3340114	3340749	PA2983|CDS|-	0	-	0
chromosome	3347914	3347924	PA0048_pwm	9.89831	+	3.39e-06	0.0355	CGGCCTGGCCG	chromosome	3348073	3348795	PA2990|CDS|-	0	+	-150
chromosome	3354273	3354283	PA0048_pwm	9.89831	-	3.39e-06	0.0355	CGGCCTGGCCG	chromosome	3354169	3354954	PA2997|CDS|nqrC	0	-	0
chromosome	3358195	3358205	PA0048_pwm	9.89831	-	3.39e-06	0.0355	CGGCCTGGCCG	chromosome	3357758	3359167	PA3000|CDS|aroP1	0	-	0
chromosome	3375872	3375882	PA0048_pwm	9.89831	+	3.39e-06	0.0355	CGGCCTGGCCG	chromosome	3377035	3377853	PA3015|CDS|-	0	+	-1154
chromosome	3389756	3389766	PA0048_pwm	9.89831	-	3.39e-06	0.0355	CGGCCTGGCCG	chromosome	3389436	3391031	PA3026|CDS|-	0	-	0
chromosome	3410928	3410938	PA0048_pwm	9.89831	+	3.39e-06	0.0355	CGGCCTGGCCG	chromosome	3410264	3411694	PA3047|CDS|-	0	+	0
chromosome	3450939	3450949	PA0048_pwm	9.89831	-	3.39e-06	0.0355	CGGCCTGGCCG	chromosome	3441713	3442330	PA3069|CDS|-	0	-	-8610
chromosome	3455850	3455860	PA0048_pwm	9.89831	-	3.39e-06	0.0355	CGGCCTGGCCG	chromosome	3455266	3456363	PA3080|CDS|-	0	-	0
chromosome	3471627	3471637	PA0048_pwm	9.89831	-	3.39e-06	0.0355	CGGCCTGGCCG	chromosome	3470764	3472803	PA3092|CDS|fadH1	0	-	0
chromosome	3496303	3496313	PA0048_pwm	9.89831	-	3.39e-06	0.0355	CGGCCTGGCCG	chromosome	3495446	3498205	PA3115|CDS|fimV	0	-	0
chromosome	3496303	3496313	PA0048_pwm	9.89831	-	3.39e-06	0.0355	CGGCCTGGCCG	chromosome	3495446	3498205	PA3115|motility	0	-	0
chromosome	3520034	3520044	PA0048_pwm	9.89831	+	3.39e-06	0.0355	CGGCCTTGCCA	chromosome	3519045	3520544	PA3137|CDS|-	0	+	0
chromosome	3562237	3562247	PA0048_pwm	9.89831	+	3.39e-06	0.0355	CGGCCTGGCCG	chromosome	3562106	3562804	PA3171|CDS|ubiG	0	+	0
chromosome	3565216	3565226	PA0048_pwm	9.89831	-	3.39e-06	0.0355	CGGCCTTGCCA	chromosome	3559435	3560511	PA3169|CDS|-	0	-	-4706
chromosome	3572253	3572263	PA0048_pwm	9.89831	-	3.39e-06	0.0355	CGGCCTGGCCG	chromosome	3571621	3572337	PA3182|CDS|pgl	0	-	0
chromosome	3572253	3572263	PA0048_pwm	9.89831	-	3.39e-06	0.0355	CGGCCTGGCCG	chromosome	3571621	3572337	PA3182|ROS	0	-	0
chromosome	3586277	3586287	PA0048_pwm	9.89831	+	3.39e-06	0.0355	CGGCCTGGCCG	chromosome	3587304	3587432	PA3195_promoter|ROS	0	+	-1018
chromosome	3603371	3603381	PA0048_pwm	9.89831	+	3.39e-06	0.0355	CGGCCTGGCCG	chromosome	3603327	3603971	PA3214|antibiotic resistance	0	+	0
chromosome	3603371	3603381	PA0048_pwm	9.89831	+	3.39e-06	0.0355	CGGCCTGGCCG	chromosome	3603327	3603971	PA3214|CDS|-	0	+	0
chromosome	3663787	3663797	PA0048_pwm	9.89831	-	3.39e-06	0.0355	CGGCCTGGCCG	chromosome	3663509	3667855	PA3272|CDS|-	0	-	0
chromosome	3664765	3664775	PA0048_pwm	9.89831	-	3.39e-06	0.0355	CGGCCTGGCCG	chromosome	3663509	3667855	PA3272|CDS|-	0	-	0
chromosome	3674899	3674909	PA0048_pwm	9.89831	-	3.39e-06	0.0355	CGGCCTGGCCG	chromosome	3674570	3675160	PA3281|CDS|-	0	-	0
chromosome	3700028	3700038	PA0048_pwm	9.89831	+	3.39e-06	0.0355	CGGCCTGGCCG	chromosome	3699369	3700319	PA3301|CDS|-	0	+	0
chromosome	3714269	3714279	PA0048_pwm	9.89831	+	3.39e-06	0.0355	CGGCCTGGCCG	chromosome	3712560	3714911	PA3311|CDS|nbdA	0	+	0
chromosome	3755734	3755744	PA0048_pwm	9.89831	-	3.39e-06	0.0355	CGGCCTGGCCG	chromosome	3755021	3757159	PA3344|CDS|recQ	0	-	0
chromosome	3782093	3782103	PA0048_pwm	9.89831	-	3.39e-06	0.0355	CGGCATGGCCA	chromosome	3781680	3782843	PA3374|CDS|-	0	-	0
chromosome	3790557	3790567	PA0048_pwm	9.89831	-	3.39e-06	0.0355	CGGCCTGGCCG	chromosome	3790150	3790986	PA3384|CDS|phnC	0	-	0
chromosome	3836876	3836886	PA0048_pwm	9.89831	-	3.39e-06	0.0355	CGGCATGGCCA	chromosome	3836466	3837377	PA3427|CDS|-	0	-	0
chromosome	3841503	3841513	PA0048_pwm	9.89831	-	3.39e-06	0.0355	CGGCCTGGCCG	chromosome	3840359	3840748	PA3432|CDS|-	0	-	-756
chromosome	3847487	3847497	PA0048_pwm	9.89831	+	3.39e-06	0.0355	CGGCCTGGCCG	chromosome	3847200	3847538	PA3440.1|CDS|-	0	+	0
chromosome	3848402	3848412	PA0048_pwm	9.89831	-	3.39e-06	0.0355	CGGCCTGGCCG	chromosome	3847974	3848798	PA3442|CDS|-	0	-	0
chromosome	3863097	3863107	PA0048_pwm	9.89831	+	3.39e-06	0.0355	CGGCCTGGCCG	chromosome	3862309	3864273	PA3456|CDS|-	0	+	0
chromosome	3892090	3892100	PA0048_pwm	9.89831	-	3.39e-06	0.0355	CGGCCTGGCCG	chromosome	3892056	3892120	PA3478_promoter|QS	0	-	0
chromosome	3908567	3908577	PA0048_pwm	9.89831	-	3.39e-06	0.0355	CGGCCTGGCCG	chromosome	3894099	3895193	PA3481|CDS|-	0	-	-13375
chromosome	3925722	3925732	PA0048_pwm	9.89831	-	3.39e-06	0.0355	CGGCATGGCCA	chromosome	3925369	3926238	PA3509|CDS|-	0	-	0
chromosome	3994306	3994316	PA0048_pwm	9.89831	-	3.39e-06	0.0355	CGGCCTGGCCG	chromosome	3991541	3994411	PA3562|CDS|fruI	0	-	0
chromosome	3994804	3994814	PA0048_pwm	9.89831	-	3.39e-06	0.0355	CGGCCTTGCCA	chromosome	3991541	3994411	PA3562|CDS|fruI	0	-	-394
chromosome	4003616	4003626	PA0048_pwm	9.89831	-	3.39e-06	0.0355	CGGCCTGGCCG	chromosome	4002108	4003601	PA3570|CDS|mmsA	0	-	-16
chromosome	4015860	4015870	PA0048_pwm	9.89831	-	3.39e-06	0.0355	CGGCCTGGCCG	chromosome	4012071	4012541	PA3580|CDS|-	0	-	-3320
chromosome	4029869	4029879	PA0048_pwm	9.89831	+	3.39e-06	0.0355	CGGCCTGGCCG	chromosome	4029759	4031168	PA3595|CDS|-	0	+	0
chromosome	4042203	4042213	PA0048_pwm	9.89831	-	3.39e-06	0.0355	CGGCCAGACCA	chromosome	4040104	4040820	PA3606|CDS|-	0	-	-1384
chromosome	4087098	4087108	PA0048_pwm	9.89831	-	3.39e-06	0.0355	CGGCCTGGCCG	chromosome	4085062	4087455	PA3648|CDS|opr86	0	-	0
chromosome	4109925	4109935	PA0048_pwm	9.89831	-	3.39e-06	0.0355	CGGCCTGGCCG	chromosome	4108489	4110336	PA3670|CDS|-	0	-	0
chromosome	4143433	4143443	PA0048_pwm	9.89831	-	3.39e-06	0.0355	CGGCCTGGCCG	chromosome	4142570	4143665	PA3700|pseudo|-	0	-	0
chromosome	4179797	4179807	PA0048_pwm	9.89831	-	3.39e-06	0.0355	CGGCCTGGCCG	chromosome	4179276	4181342	PA3729|CDS|-	0	-	0
chromosome	4179851	4179861	PA0048_pwm	9.89831	-	3.39e-06	0.0355	CGGCCTGGCCG	chromosome	4179276	4181342	PA3729|CDS|-	0	-	0
chromosome	4181857	4181867	PA0048_pwm	9.89831	+	3.39e-06	0.0355	CGGCCTGGCCG	chromosome	4183710	4184939	PA3733|CDS|-	0	+	-1844
chromosome	4197222	4197232	PA0048_pwm	9.89831	-	3.39e-06	0.0355	CGGCATGGCCA	chromosome	4197169	4198542	PA3746|CDS|ffh	0	-	0
chromosome	4199931	4199941	PA0048_pwm	9.89831	+	3.39e-06	0.0355	CGGCCTGGCCG	chromosome	4199656	4200948	PA3748|CDS|-	0	+	0
chromosome	4210206	4210216	PA0048_pwm	9.89831	+	3.39e-06	0.0355	CGGCCTGGCCG	chromosome	4209256	4210278	PA3759|CDS|-	0	+	0
chromosome	4212508	4212518	PA0048_pwm	9.89831	+	3.39e-06	0.0355	CGGCCTGGCCG	chromosome	4210295	4212823	PA3760|CDS|-	0	+	0
chromosome	4231571	4231581	PA0048_pwm	9.89831	+	3.39e-06	0.0355	CGGCCTGGCCG	chromosome	4231071	4232228	PA3773|CDS|-	0	+	0
chromosome	4232177	4232187	PA0048_pwm	9.89831	+	3.39e-06	0.0355	CGGCCTGGCCG	chromosome	4231071	4232228	PA3773|CDS|-	0	+	0
chromosome	4298862	4298872	PA0048_pwm	9.89831	+	3.39e-06	0.0355	CGGCATGGCCA	chromosome	4298311	4299201	PA3837|CDS|-	0	+	0
chromosome	4298964	4298974	PA0048_pwm	9.89831	+	3.39e-06	0.0355	CGGCCTGGCCG	chromosome	4298311	4299201	PA3837|CDS|-	0	+	0
chromosome	4307167	4307177	PA0048_pwm	9.89831	-	3.39e-06	0.0355	CGGCCAGACCA	chromosome	4305645	4306256	PA3844|CDS|-	0	-	-912
chromosome	4330449	4330459	PA0048_pwm	9.89831	+	3.39e-06	0.0355	CGGCCTGGCCG	chromosome	4330321	4330896	PA3867|CDS|-	0	+	0
chromosome	4335149	4335159	PA0048_pwm	9.89831	-	3.39e-06	0.0355	CGGCATGGCCA	chromosome	4334403	4335221	PA3871|antibiotic resistance	0	-	0
chromosome	4335149	4335159	PA0048_pwm	9.89831	-	3.39e-06	0.0355	CGGCATGGCCA	chromosome	4334403	4335221	PA3871|CDS|-	0	-	0
chromosome	4342352	4342362	PA0048_pwm	9.89831	+	3.39e-06	0.0355	CGGCCTGGCCG	chromosome	4345010	4346878	PA3878|CDS|narX	0	+	-2649
chromosome	4343587	4343597	PA0048_pwm	9.89831	+	3.39e-06	0.0355	CGGCCTGGCCG	chromosome	4345010	4346878	PA3878|CDS|narX	0	+	-1414
chromosome	4344502	4344512	PA0048_pwm	9.89831	-	3.39e-06	0.0355	CGGCCTGGCCG	chromosome	4343540	4344835	PA3877|antibiotic resistance	0	-	0
chromosome	4344502	4344512	PA0048_pwm	9.89831	-	3.39e-06	0.0355	CGGCCTGGCCG	chromosome	4343540	4344835	PA3877|CDS|narK1	0	-	0
chromosome	4348803	4348813	PA0048_pwm	9.89831	-	3.39e-06	0.0355	CGGCCTGGCCG	chromosome	4344836	4345009	PA3871_promoter|antibiotic resistance	0	-	-3795
chromosome	4348803	4348813	PA0048_pwm	9.89831	-	3.39e-06	0.0355	CGGCCTGGCCG	chromosome	4344836	4345009	PA3872_promoter|antibiotic resistance	0	-	-3795
chromosome	4348803	4348813	PA0048_pwm	9.89831	-	3.39e-06	0.0355	CGGCCTGGCCG	chromosome	4344836	4345009	PA3873_promoter|antibiotic resistance	0	-	-3795
chromosome	4348803	4348813	PA0048_pwm	9.89831	-	3.39e-06	0.0355	CGGCCTGGCCG	chromosome	4344836	4345009	PA3874_promoter|antibiotic resistance	0	-	-3795
chromosome	4348803	4348813	PA0048_pwm	9.89831	-	3.39e-06	0.0355	CGGCCTGGCCG	chromosome	4344836	4345009	PA3875_promoter|antibiotic resistance	0	-	-3795
chromosome	4348803	4348813	PA0048_pwm	9.89831	-	3.39e-06	0.0355	CGGCCTGGCCG	chromosome	4344836	4345009	PA3876_promoter|antibiotic resistance	0	-	-3795
chromosome	4348803	4348813	PA0048_pwm	9.89831	-	3.39e-06	0.0355	CGGCCTGGCCG	chromosome	4344836	4345009	PA3877_promoter|antibiotic resistance	0	-	-3795
chromosome	4356171	4356181	PA0048_pwm	9.89831	-	3.39e-06	0.0355	CGGCCTGGCCG	chromosome	4352828	4354102	PA3887|CDS|nhaP	0	-	-2070
chromosome	4396712	4396722	PA0048_pwm	9.89831	+	3.39e-06	0.0355	CGGCCTGGCCG	chromosome	4400123	4401298	PA3925|CDS|-	0	+	-3402
chromosome	4441630	4441640	PA0048_pwm	9.89831	+	3.39e-06	0.0355	CGGCCTGGCCG	chromosome	4442453	4442869	PA3962|CDS|-	0	+	-814
chromosome	4504933	4504943	PA0048_pwm	9.89831	+	3.39e-06	0.0355	CGGCCTGGCCG	chromosome	4504001	4505449	PA4023|CDS|eat	0	+	0
chromosome	4509199	4509209	PA0048_pwm	9.89831	-	3.39e-06	0.0355	CGGCCTGGCCG	chromosome	4500001	4501932	PA4021|CDS|eatR	0	-	-7268
chromosome	4520332	4520342	PA0048_pwm	9.89831	-	3.39e-06	0.0355	CGGCCTGGCCG	chromosome	4513168	4513884	PA4032|CDS|-	0	-	-6449
chromosome	4556226	4556236	PA0048_pwm	9.89831	+	3.39e-06	0.0355	CGGCCTTGCCA	chromosome	4555254	4558229	PA4078|CDS|-	0	+	0
chromosome	4572436	4572446	PA0048_pwm	9.89831	-	3.39e-06	0.0355	CGGCCTGGCCG	chromosome	4569624	4570095	PA4085_promoter|motility	0	-	-2342
chromosome	4572436	4572446	PA0048_pwm	9.89831	-	3.39e-06	0.0355	CGGCCTGGCCG	chromosome	4569624	4570095	PA4086_promoter|motility	0	-	-2342
chromosome	4616230	4616240	PA0048_pwm	9.89831	+	3.39e-06	0.0355	CGGCCTGGCCG	chromosome	4616162	4616968	PA4128|CDS|-	0	+	0
chromosome	4638513	4638523	PA0048_pwm	9.89831	+	3.39e-06	0.0355	CGGCCTGGCCG	chromosome	4637809	4638699	PA4145|CDS|-	0	+	0
chromosome	4640500	4640510	PA0048_pwm	9.89831	+	3.39e-06	0.0355	CGGCCTGGCCG	chromosome	4641711	4642511	PA4148|CDS|-	0	+	-1202
chromosome	4648239	4648249	PA0048_pwm	9.89831	+	3.39e-06	0.0355	CGGCCTGGCCG	chromosome	4652714	4653502	PA4157|CDS|-	0	+	-4466
chromosome	4653904	4653914	PA0048_pwm	9.89831	-	3.39e-06	0.0355	CGGCCTGGCCG	chromosome	4653509	4654306	PA4158|CDS|fepC	0	-	0
chromosome	4653904	4653914	PA0048_pwm	9.89831	-	3.39e-06	0.0355	CGGCCTGGCCG	chromosome	4653509	4654306	PA4158|siderophore	0	-	0
chromosome	4655763	4655773	PA0048_pwm	9.89831	+	3.39e-06	0.0355	CGGCCTGGCCG	chromosome	4655368	4656390	PA4160|CDS|fepD	0	+	0
chromosome	4655763	4655773	PA0048_pwm	9.89831	+	3.39e-06	0.0355	CGGCCTGGCCG	chromosome	4655368	4656390	PA4160|siderophore	0	+	0
chromosome	4658980	4658990	PA0048_pwm	9.89831	+	3.39e-06	0.0355	CGGCCTGGCCG	chromosome	4658450	4660159	PA4163|CDS|-	0	+	0
chromosome	4690812	4690822	PA0048_pwm	9.89831	-	3.39e-06	0.0355	CGGCCTGGCCG	chromosome	4690642	4691346	PA4193|CDS|-	0	-	0
chromosome	4710677	4710687	PA0048_pwm	9.89831	+	3.39e-06	0.0355	CGGCCTGGCCG	chromosome	4710621	4712084	PA4208|antibiotic resistance	0	+	0
chromosome	4710677	4710687	PA0048_pwm	9.89831	+	3.39e-06	0.0355	CGGCCTGGCCG	chromosome	4710621	4712084	PA4208|CDS|opmD	0	+	0
chromosome	4716791	4716801	PA0048_pwm	9.89831	+	3.39e-06	0.0355	CGGCCTGGCCG	chromosome	4716660	4718543	PA4214|antibiotic resistance	0	+	0
chromosome	4716791	4716801	PA0048_pwm	9.89831	+	3.39e-06	0.0355	CGGCCTGGCCG	chromosome	4716660	4718543	PA4214|CDS|phzE1	0	+	0
chromosome	4716791	4716801	PA0048_pwm	9.89831	+	3.39e-06	0.0355	CGGCCTGGCCG	chromosome	4716660	4718543	PA4214|QS	0	+	0
chromosome	4721820	4721830	PA0048_pwm	9.89831	+	3.39e-06	0.0355	CGGCCTGGCCG	chromosome	4742424	4744067	PA4228|CDS|pchD	0	+	-20595
chromosome	4732355	4732365	PA0048_pwm	9.89831	-	3.39e-06	0.0355	CGGCCTGGCCG	chromosome	4731369	4736798	PA4225|antibiotic resistance	0	-	0
chromosome	4732355	4732365	PA0048_pwm	9.89831	-	3.39e-06	0.0355	CGGCCTGGCCG	chromosome	4731369	4736798	PA4225|CDS|pchF	0	-	0
chromosome	4811914	4811924	PA0048_pwm	9.89831	+	3.39e-06	0.0355	CGGCCTGGCCG	chromosome	4811396	4812601	PA4289|CDS|-	0	+	0
chromosome	4813545	4813555	PA0048_pwm	9.89831	-	3.39e-06	0.0355	CGGCCTGGCCG	chromosome	4812598	4814214	PA4290|CDS|-	0	-	0
chromosome	4816314	4816324	PA0048_pwm	9.89831	+	3.39e-06	0.0355	CGGCATGGCCA	chromosome	4815043	4816512	PA4292|CDS|-	0	+	0
chromosome	4837794	4837804	PA0048_pwm	9.89831	+	3.39e-06	0.0355	CGGCCAGACCA	chromosome	4837390	4839279	PA4310|CDS|pctB	0	+	0
chromosome	4865054	4865064	PA0048_pwm	9.89831	-	3.39e-06	0.0355	CGGCCTGGCCG	chromosome	4864994	4865578	PA4336|CDS|-	0	-	0
chromosome	4930152	4930162	PA0048_pwm	9.89831	+	3.39e-06	0.0355	CGGCCTGGCCG	chromosome	4930099	4930677	PA4399|CDS|-	0	+	0
chromosome	4935929	4935939	PA0048_pwm	9.89831	+	3.39e-06	0.0355	CGGCCTGGCCG	chromosome	4937820	4938215	PA4405|CDS|-	0	+	-1882
chromosome	4943144	4943154	PA0048_pwm	9.89831	-	3.39e-06	0.0355	CGGCATGGCCA	chromosome	4942677	4943636	PA4410|CDS|ddlB	0	-	0
chromosome	4949604	4949614	PA0048_pwm	9.89831	+	3.39e-06	0.0355	CGGCCTGGCCG	chromosome	4956328	4956536	PA4421.1|ncRNA|rnpB	0	+	-6715
chromosome	4975680	4975690	PA0048_pwm	9.89831	+	3.39e-06	0.0355	CGGCCTGGCCG	chromosome	4977869	4978972	PA4444|CDS|mltB1	0	+	-2180
chromosome	5015659	5015669	PA0048_pwm	9.89831	-	3.39e-06	0.0355	CGGCATGGCCA	chromosome	5012394	5013431	PA4481|CDS|mreB	0	-	-2229
chromosome	5020174	5020184	PA0048_pwm	9.89831	+	3.39e-06	0.0355	CGGCCTGGCCG	chromosome	5030525	5031235	PA4495|CDS|-	0	+	-10342
chromosome	5020626	5020636	PA0048_pwm	9.89831	-	3.39e-06	0.0355	CGGCCTGGCCG	chromosome	5020402	5024952	PA4489|CDS|magD	0	-	0
chromosome	5021298	5021308	PA0048_pwm	9.89831	-	3.39e-06	0.0355	CGGCCTGGCCG	chromosome	5020402	5024952	PA4489|CDS|magD	0	-	0
chromosome	5033720	5033730	PA0048_pwm	9.89831	-	3.39e-06	0.0355	CGGCATGGCCA	chromosome	5028980	5030248	PA4494|CDS|roxS	0	-	-3473
chromosome	5111128	5111138	PA0048_pwm	9.89831	-	3.39e-06	0.0355	CGGCCTGGCCG	chromosome	5110841	5112379	PA4562|CDS|-	0	-	0
chromosome	5120697	5120707	PA0048_pwm	9.89831	+	3.39e-06	0.0355	CGGCCTGGCCG	chromosome	5126166	5126654	PA4578|CDS|-	0	+	-5460
chromosome	5128658	5128668	PA0048_pwm	9.89831	-	3.39e-06	0.0355	CGGCCTGGCCG	chromosome	5128563	5129117	PA4580|CDS|-	0	-	0
chromosome	5130594	5130604	PA0048_pwm	9.89831	-	3.39e-06	0.0355	CGGCCTGGCCG	chromosome	5129173	5130768	PA4581|CDS|rtcR	0	-	0
chromosome	5135444	5135454	PA0048_pwm	9.89831	-	3.39e-06	0.0355	CGGCCTGGCCG	chromosome	5129173	5130768	PA4581|CDS|rtcR	0	-	-4677
chromosome	5146007	5146017	PA0048_pwm	9.89831	-	3.39e-06	0.0355	CGGCCTGGCCG	chromosome	5145717	5146403	PA4594|CDS|-	0	-	0
chromosome	5163146	5163156	PA0048_pwm	9.89831	-	3.39e-06	0.0355	CGGCCTGGCCG	chromosome	5162472	5163476	PA4604|CDS|-	0	-	0
chromosome	5203829	5203839	PA0048_pwm	9.89831	+	3.39e-06	0.0355	CGGCCTGGCCG	chromosome	5203668	5204372	PA4635|CDS|-	0	+	0
chromosome	5211504	5211514	PA0048_pwm	9.89831	-	3.39e-06	0.0355	CGGCCTGGCCG	chromosome	5211079	5211564	PA4643|CDS|-	0	-	0
chromosome	5213716	5213726	PA0048_pwm	9.89831	+	3.39e-06	0.0355	CGGCCTGGCCG	chromosome	5213474	5214757	PA4647|CDS|uraA	0	+	0
chromosome	5218345	5218355	PA0048_pwm	9.89831	-	3.39e-06	0.0355	CGGCCTGGCCG	chromosome	5212107	5212664	PA4645|CDS|-	0	-	-5682
chromosome	5249433	5249443	PA0048_pwm	9.89831	+	3.39e-06	0.0355	CGGCCTGGCCG	chromosome	5252474	5252757	PA4685_promoter|antibiotic resistance	0	+	-3032
chromosome	5286847	5286857	PA0048_pwm	9.89831	-	3.39e-06	0.0355	CGGCCTGGCCG	chromosome	5286035	5287018	PA4707|CDS|phuU	0	-	0
chromosome	5286847	5286857	PA0048_pwm	9.89831	-	3.39e-06	0.0355	CGGCCTGGCCG	chromosome	5286035	5287018	PA4707|siderophore	0	-	0
chromosome	5291556	5291566	PA0048_pwm	9.89831	-	3.39e-06	0.0355	CGGCATGGCCA	chromosome	5289037	5289216	PA4706_promoter|siderophore	0	-	-2341
chromosome	5291556	5291566	PA0048_pwm	9.89831	-	3.39e-06	0.0355	CGGCATGGCCA	chromosome	5289037	5289216	PA4707_promoter|siderophore	0	-	-2341
chromosome	5291556	5291566	PA0048_pwm	9.89831	-	3.39e-06	0.0355	CGGCATGGCCA	chromosome	5289037	5289216	PA4708_promoter|siderophore	0	-	-2341
chromosome	5291556	5291566	PA0048_pwm	9.89831	-	3.39e-06	0.0355	CGGCATGGCCA	chromosome	5289037	5289216	PA4709_promoter|siderophore	0	-	-2341
chromosome	5295226	5295236	PA0048_pwm	9.89831	+	3.39e-06	0.0355	CGGCCTGGCCG	chromosome	5295170	5296024	PA4716|CDS|-	0	+	0
chromosome	5299032	5299042	PA0048_pwm	9.89831	-	3.39e-06	0.0355	CGGCATGGCCA	chromosome	5297007	5297483	PA4718|CDS|-	0	-	-1550
chromosome	5328551	5328561	PA0048_pwm	9.89831	-	3.39e-06	0.0355	CGGCCTGGCCG	chromosome	5327427	5329949	PA4744|CDS|infB	0	-	0
chromosome	5347160	5347170	PA0048_pwm	9.89831	+	3.39e-06	0.0355	CGGCCTGGCCG	chromosome	5349929	5351605	PA4763|CDS|recN	0	+	-2760
chromosome	5397908	5397918	PA0048_pwm	9.89831	-	3.39e-06	0.0355	CGGCCTGGCCG	chromosome	5397690	5398619	PA4811|CDS|fdnH	0	-	0
chromosome	5425747	5425757	PA0048_pwm	9.89831	+	3.39e-06	0.0355	CGGCATGGCCA	chromosome	5429984	5431138	PA4838|CDS|-	0	+	-4228
chromosome	5499666	5499676	PA0048_pwm	9.89831	-	3.39e-06	0.0355	CGGCCTGGCCG	chromosome	5498740	5500326	PA4901|CDS|mdlC	0	-	0
chromosome	5503668	5503678	PA0048_pwm	9.89831	+	3.39e-06	0.0355	CGGCCTGGCCG	chromosome	5503051	5504106	PA4904|CDS|vanA	0	+	0
chromosome	5530521	5530531	PA0048_pwm	9.89831	-	3.39e-06	0.0355	CGGCCTGGCCG	chromosome	5528659	5530902	PA4928|CDS|-	0	-	0
chromosome	5530728	5530738	PA0048_pwm	9.89831	-	3.39e-06	0.0355	CGGCATGGCCA	chromosome	5528659	5530902	PA4928|CDS|-	0	-	0
chromosome	5567780	5567790	PA0048_pwm	9.89831	-	3.39e-06	0.0355	CGGCCTGGCCG	chromosome	5567655	5568944	PA4960|antibiotic resistance	0	-	0
chromosome	5567780	5567790	PA0048_pwm	9.89831	-	3.39e-06	0.0355	CGGCCTGGCCG	chromosome	5567655	5568944	PA4960|CDS|-	0	-	0
chromosome	5591646	5591656	PA0048_pwm	9.89831	-	3.39e-06	0.0355	CGGCATGGCCA	chromosome	5591452	5592612	PA4979|CDS|-	0	-	0
chromosome	5606813	5606823	PA0048_pwm	9.89831	+	3.39e-06	0.0355	CGGCCTGGCCG	chromosome	5606496	5607671	PA4991|CDS|-	0	+	0
chromosome	5607715	5607725	PA0048_pwm	9.89831	+	3.39e-06	0.0355	CGGCCTGGCCG	chromosome	5607668	5608480	PA4992|CDS|-	0	+	0
chromosome	5610491	5610501	PA0048_pwm	9.89831	+	3.39e-06	0.0355	CGGCATGGCCA	chromosome	5615652	5616302	PA4998|CDS|-	0	+	-5152
chromosome	5630112	5630122	PA0048_pwm	9.89831	-	3.39e-06	0.0355	CGGCATGGCCA	chromosome	5629786	5630853	PA5011|CDS|waaC	0	-	0
chromosome	5656965	5656975	PA0048_pwm	9.89831	+	3.39e-06	0.0355	CGGCCTGGCCG	chromosome	5657016	5657468	PA5026|CDS|-	0	+	-42
chromosome	5660806	5660816	PA0048_pwm	9.89831	+	3.39e-06	0.0355	CGGCCTGGCCG	chromosome	5660357	5661673	PA5030|CDS|-	0	+	0
chromosome	5697236	5697246	PA0048_pwm	9.89831	+	3.39e-06	0.0355	CGGCCAGACCA	chromosome	5697198	5698055	PA5057|CDS|phaD	0	+	0
chromosome	5728694	5728704	PA0048_pwm	9.89831	+	3.39e-06	0.0355	CGGCCTGGCCG	chromosome	5749453	5750814	PA5106|CDS|-	0	+	-20750
chromosome	5730615	5730625	PA0048_pwm	9.89831	+	3.39e-06	0.0355	CGGCCTGGCCG	chromosome	5749453	5750814	PA5106|CDS|-	0	+	-18829
chromosome	5755419	5755429	PA0048_pwm	9.89831	-	3.39e-06	0.0355	CGGCCTGGCCG	chromosome	5754298	5756238	PA5112|CDS|estA	0	-	0
chromosome	5758883	5758893	PA0048_pwm	9.89831	-	3.39e-06	0.0355	CGGCCTGGCCG	chromosome	5757738	5761343	PA5114|CDS|-	0	-	0
chromosome	5805849	5805859	PA0048_pwm	9.89831	+	3.39e-06	0.0355	CGGCCTGGCCG	chromosome	5805680	5807158	PA5158|antibiotic resistance	0	+	0
chromosome	5805849	5805859	PA0048_pwm	9.89831	+	3.39e-06	0.0355	CGGCCTGGCCG	chromosome	5805680	5807158	PA5158|CDS|-	0	+	0
chromosome	5830977	5830987	PA0048_pwm	9.89831	-	3.39e-06	0.0355	CGGCCTGGCCG	chromosome	5830313	5830750	PA5178|CDS|-	0	-	-228
chromosome	5890921	5890931	PA0048_pwm	9.89831	-	3.39e-06	0.0355	CGGCCTGGCCG	chromosome	5889829	5890902	PA5232|CDS|-	0	-	-20
chromosome	5940112	5940122	PA0048_pwm	9.89831	-	3.39e-06	0.0355	CGGCCAGACCA	chromosome	5940020	5940424	PA5274|CDS|rnk	0	-	0
chromosome	5967125	5967135	PA0048_pwm	9.89831	-	3.39e-06	0.0355	CGGCCTGGCCG	chromosome	5960852	5962528	PA5295|CDS|-	0	-	-4598
chromosome	5991575	5991585	PA0048_pwm	9.89831	-	3.39e-06	0.0355	CGGCCTGGCCG	chromosome	5988646	5989320	PA5319|CDS|radC	0	-	-2256
chromosome	6031830	6031840	PA0048_pwm	9.89831	-	3.39e-06	0.0355	CGGCATGGCCA	chromosome	6031366	6032268	PA5364|CDS|-	0	-	0
chromosome	6037894	6037904	PA0048_pwm	9.89831	-	3.39e-06	0.0355	CGGCCTGGCCG	chromosome	6037790	6038211	PA5366_promoter|antibiotic resistance	0	-	0
chromosome	6065879	6065889	PA0048_pwm	9.89831	-	3.39e-06	0.0355	CGGCCTGGCCG	chromosome	6065856	6066794	PA5388|CDS|caiX	0	-	0
chromosome	6066572	6066582	PA0048_pwm	9.89831	-	3.39e-06	0.0355	CGGCCTGGCCG	chromosome	6065856	6066794	PA5388|CDS|caiX	0	-	0
chromosome	6071528	6071538	PA0048_pwm	9.89831	+	3.39e-06	0.0355	CGGCCTGGCCG	chromosome	6073538	6074008	PA5395|CDS|-	0	+	-2001
chromosome	6078868	6078878	PA0048_pwm	9.89831	+	3.39e-06	0.0355	CGGCCTGGCCG	chromosome	6078044	6080005	PA5399|CDS|dgcB	0	+	0
chromosome	6081757	6081767	PA0048_pwm	9.89831	+	3.39e-06	0.0355	CGGCCTGGCCG	chromosome	6081392	6082165	PA5401|CDS|-	0	+	0
chromosome	6097566	6097576	PA0048_pwm	9.89831	+	3.39e-06	0.0355	CGGCCTGGCCG	chromosome	6097024	6100041	PA5418|CDS|soxA	0	+	0
chromosome	6102285	6102295	PA0048_pwm	9.89831	-	3.39e-06	0.0355	CGGCCTGGCCG	chromosome	6093167	6093808	PA5414|CDS|-	0	-	-8478
chromosome	6102477	6102487	PA0048_pwm	9.89831	+	3.39e-06	0.0355	CGGCCTGGCCG	chromosome	6101884	6103083	PA5421|CDS|fdhA	0	+	0
chromosome	6111305	6111315	PA0048_pwm	9.89831	-	3.39e-06	0.0355	CGGCCTGGCCG	chromosome	6111048	6112262	PA5430|CDS|-	0	-	0
chromosome	6146750	6146760	PA0048_pwm	9.89831	+	3.39e-06	0.0355	CGGCCTGGCCG	chromosome	6145399	6147027	PA5455|CDS|-	0	+	0
chromosome	6155624	6155634	PA0048_pwm	9.89831	+	3.39e-06	0.0355	CGGCCTGGCCG	chromosome	6155271	6156215	PA5466|CDS|-	0	+	0
chromosome	6174325	6174335	PA0048_pwm	9.89831	+	3.39e-06	0.0355	CGGCCTGGCCG	chromosome	6173348	6174697	PA5483|biofilm	0	+	0
chromosome	6174325	6174335	PA0048_pwm	9.89831	+	3.39e-06	0.0355	CGGCCTGGCCG	chromosome	6173348	6174697	PA5483|CDS|algB	0	+	0
chromosome	6209812	6209822	PA0048_pwm	9.89831	+	3.39e-06	0.0355	CGGCATGGCCA	chromosome	6212790	6213533	PA5520|CDS|-	0	+	-2969
chromosome	6211804	6211814	PA0048_pwm	9.89831	+	3.39e-06	0.0355	CGGCCTGGCCG	chromosome	6212790	6213533	PA5520|CDS|-	0	+	-977
chromosome	10940	10950	PA0048_pwm	9.87288	+	4.31e-06	0.0355	CGGCCAGGCCG	chromosome	13540	14091	PA0010|CDS|tag	0	+	-2591
chromosome	11387	11397	PA0048_pwm	9.87288	+	4.31e-06	0.0355	CGGCCAGGCCG	chromosome	13540	14091	PA0010|CDS|tag	0	+	-2144
chromosome	20448	20458	PA0048_pwm	9.87288	+	4.31e-06	0.0355	CGGCCAGGCCG	chromosome	21712	22737	PA0020|CDS|tsaP	0	+	-1255
chromosome	31584	31594	PA0048_pwm	9.87288	+	4.31e-06	0.0355	CGGCCAGGCCG	chromosome	34624	35538	PA0032|CDS|-	0	+	-3031
chromosome	35025	35035	PA0048_pwm	9.87288	-	4.31e-06	0.0355	CGGCCAGGCCG	chromosome	33000	34511	PA0031|CDS|betC	0	-	-515
chromosome	60152	60162	PA0048_pwm	9.87288	+	4.31e-06	0.0355	TGGCCTGACCG	chromosome	58786	60159	PA0044|CDS|exoT	0	+	0
chromosome	60152	60162	PA0048_pwm	9.87288	+	4.31e-06	0.0355	TGGCCTGACCG	chromosome	58786	60159	PA0044|T3SS	0	+	0
chromosome	67193	67203	PA0048_pwm	9.87288	+	4.31e-06	0.0355	CGGCCAGGCCG	chromosome	66303	68135	PA0051|CDS|phzH	0	+	0
chromosome	67193	67203	PA0048_pwm	9.87288	+	4.31e-06	0.0355	CGGCCAGGCCG	chromosome	66303	68135	PA0051|QS	0	+	0
chromosome	83072	83082	PA0048_pwm	9.87288	+	4.31e-06	0.0355	CGGCCAGGCCG	chromosome	99757	100123	PA0082_promoter|T6SS	0	+	-16676
chromosome	114454	114464	PA0048_pwm	9.87288	+	4.31e-06	0.0355	CGGCCAGGCCG	chromosome	115046	115298	PA0095_promoter|T6SS	0	+	-583
chromosome	114454	114464	PA0048_pwm	9.87288	+	4.31e-06	0.0355	CGGCCAGGCCG	chromosome	115046	115298	PA0099_promoter|T6SS	0	+	-583
chromosome	122418	122428	PA0048_pwm	9.87288	+	4.31e-06	0.0355	CGGCCAGGCCG	chromosome	122248	123495	PA0101|CDS|-	0	+	0
chromosome	147251	147261	PA0048_pwm	9.87288	-	4.31e-06	0.0355	CGGCCATGCCA	chromosome	145965	147392	PA0129|CDS|bauD	0	-	0
chromosome	149622	149632	PA0048_pwm	9.87288	+	4.31e-06	0.0355	CGGCCAGGCCG	chromosome	150906	151823	PA0133|CDS|bauR	0	+	-1275
chromosome	152025	152035	PA0048_pwm	9.87288	+	4.31e-06	0.0355	CGGCCAGGCCG	chromosome	153696	153836	PA0135|CDS|-	0	+	-1662
chromosome	157707	157717	PA0048_pwm	9.87288	-	4.31e-06	0.0355	CGGCCAGGCCG	chromosome	151936	153306	PA0134|CDS|-	0	-	-4402
chromosome	183544	183554	PA0048_pwm	9.87288	+	4.31e-06	0.0355	CGGCCATGCCA	chromosome	182768	183706	PA0159|CDS|-	0	+	0
chromosome	196187	196197	PA0048_pwm	9.87288	+	4.31e-06	0.0355	CGGCCAGGCCG	chromosome	207071	207823	PA0182|CDS|-	0	+	-10875
chromosome	225905	225915	PA0048_pwm	9.87288	-	4.31e-06	0.0355	CGGCCAGGCCG	chromosome	217905	218822	PA0191|CDS|-	0	-	-7084
chromosome	237309	237319	PA0048_pwm	9.87288	-	4.31e-06	0.0355	CGGCCAGGCCG	chromosome	234875	235987	PA0206|CDS|-	0	-	-1323
chromosome	276962	276972	PA0048_pwm	9.87288	+	4.31e-06	0.0355	CGGCCAGGCCG	chromosome	280936	281802	PA0248|CDS|-	0	+	-3965
chromosome	312776	312786	PA0048_pwm	9.87288	+	4.31e-06	0.0355	CGGCCAGGCCG	chromosome	313227	313925	PA0279|CDS|-	0	+	-442
chromosome	321221	321231	PA0048_pwm	9.87288	+	4.31e-06	0.0355	TGGCCTGACCG	chromosome	320766	321944	PA0286|CDS|desA	0	+	0
chromosome	331330	331340	PA0048_pwm	9.87288	+	4.31e-06	0.0355	CGGCCAGGCCG	chromosome	334534	334734	PA0299_promoter|SR and persisters	0	+	-3195
chromosome	352041	352051	PA0048_pwm	9.87288	-	4.31e-06	0.0355	CGGCCAGGCCG	chromosome	351610	352164	PA0311|CDS|-	0	-	0
chromosome	391192	391202	PA0048_pwm	9.87288	+	4.31e-06	0.0355	CGGCCAGGCCG	chromosome	391094	392188	PA0348|CDS|-	0	+	0
chromosome	402064	402074	PA0048_pwm	9.87288	+	4.31e-06	0.0355	CGGCCATGCCA	chromosome	402020	402598	PA0358|CDS|-	0	+	0
chromosome	404817	404827	PA0048_pwm	9.87288	+	4.31e-06	0.0355	CGGCCAGGCCG	chromosome	411224	411871	PA0367|CDS|laoR	0	+	-6398
chromosome	422302	422312	PA0048_pwm	9.87288	-	4.31e-06	0.0355	CGGCCAGGCCG	chromosome	422212	422943	PA0378|CDS|-	0	-	0
chromosome	464852	464862	PA0048_pwm	9.87288	+	4.31e-06	0.0355	CGGCCAGGCCG	chromosome	468410	469900	PA0421|CDS|-	0	+	-3549
chromosome	465215	465225	PA0048_pwm	9.87288	+	4.31e-06	0.0355	CGGCCAGGCCG	chromosome	468410	469900	PA0421|CDS|-	0	+	-3186
chromosome	477496	477506	PA0048_pwm	9.87288	-	4.31e-06	0.0355	CGGCCAGGCCG	chromosome	471749	472023	PA0424_promoter|antibiotic resistance	0	-	-5474
chromosome	477496	477506	PA0048_pwm	9.87288	-	4.31e-06	0.0355	CGGCCAGGCCG	chromosome	471750	472023	PA0424_promoter|ROS	0	-	-5474
chromosome	494010	494020	PA0048_pwm	9.87288	+	4.31e-06	0.0355	CGGCCAGGCCG	chromosome	496871	498361	PA0443|CDS|-	0	+	-2852
chromosome	536231	536241	PA0048_pwm	9.87288	+	4.31e-06	0.0355	CGGCCAGGCCG	chromosome	539231	539707	PA0478|CDS|-	0	+	-2991
chromosome	541390	541400	PA0048_pwm	9.87288	-	4.31e-06	0.0355	CGGCCAGGCCG	chromosome	539785	540735	PA0479|CDS|-	0	-	-656
chromosome	550088	550098	PA0048_pwm	9.87288	+	4.31e-06	0.0355	CGGCCAGGCCG	chromosome	551911	552669	PA0492|CDS|-	0	+	-1814
chromosome	578163	578173	PA0048_pwm	9.87288	-	4.31e-06	0.0355	CGGCCAGGCCG	chromosome	578029	578343	PA0518|CDS|nirM	0	-	0
chromosome	593854	593864	PA0048_pwm	9.87288	-	4.31e-06	0.0355	CGGCCAGGCCG	chromosome	590896	591402	PA0532|CDS|-	0	-	-2453
chromosome	607842	607852	PA0048_pwm	9.87288	-	4.31e-06	0.0355	CGGCCAGGCCG	chromosome	604912	605913	PA0547|CDS|-	0	-	-1930
chromosome	624899	624909	PA0048_pwm	9.87288	-	4.31e-06	0.0355	CGGCCATGCCA	chromosome	624189	624803	PA0571|CDS|-	0	-	-97
chromosome	633706	633716	PA0048_pwm	9.87288	-	4.31e-06	0.0355	CGGCCAGGCCG	chromosome	630527	634264	PA0575|biofilm	0	-	0
chromosome	633706	633716	PA0048_pwm	9.87288	-	4.31e-06	0.0355	CGGCCAGGCCG	chromosome	630527	634264	PA0575|CDS|rmcA	0	-	0
chromosome	635453	635463	PA0048_pwm	9.87288	+	4.31e-06	0.0355	CGGCCAGGCCG	chromosome	639316	640341	PA0580|CDS|gcp	0	+	-3854
chromosome	642822	642832	PA0048_pwm	9.87288	-	4.31e-06	0.0355	CGGCCAGGCCG	chromosome	641932	643164	PA0584|CDS|cca	0	-	0
chromosome	646320	646330	PA0048_pwm	9.87288	-	4.31e-06	0.0355	CGGCAAGGCCA	chromosome	645358	646629	PA0587|CDS|-	0	-	0
chromosome	682782	682792	PA0048_pwm	9.87288	-	4.31e-06	0.0355	CGGCCAGGCCG	chromosome	673962	674418	PA0611_promoter|antibiotic resistance	0	-	-8365
chromosome	682782	682792	PA0048_pwm	9.87288	-	4.31e-06	0.0355	CGGCCAGGCCG	chromosome	673962	674418	PA0611_promoter|ROS	0	-	-8365
chromosome	682782	682792	PA0048_pwm	9.87288	-	4.31e-06	0.0355	CGGCCAGGCCG	chromosome	673962	674418	PA0611_promoter|T3SS	0	-	-8365
chromosome	703319	703329	PA0048_pwm	9.87288	-	4.31e-06	0.0355	CGGCCAGGCCG	chromosome	673962	674418	PA0611_promoter|antibiotic resistance	0	-	-28902
chromosome	703319	703329	PA0048_pwm	9.87288	-	4.31e-06	0.0355	CGGCCAGGCCG	chromosome	673962	674418	PA0611_promoter|ROS	0	-	-28902
chromosome	703319	703329	PA0048_pwm	9.87288	-	4.31e-06	0.0355	CGGCCAGGCCG	chromosome	673962	674418	PA0611_promoter|T3SS	0	-	-28902
chromosome	715471	715481	PA0048_pwm	9.87288	-	4.31e-06	0.0355	CGGCCAGGCCG	chromosome	714264	714686	PA0661|CDS|-	0	-	-786
chromosome	755176	755186	PA0048_pwm	9.87288	-	4.31e-06	0.0355	CGGCCAGGCCG	chromosome	738111	738485	PA0680|CDS|hxcV	0	-	-16692
chromosome	820463	820473	PA0048_pwm	9.87288	+	4.31e-06	0.0355	CGGCCAGGCCG	chromosome	824409	825080	PA0756|CDS|-	0	+	-3937
chromosome	853626	853636	PA0048_pwm	9.87288	-	4.31e-06	0.0355	CGGCCAGGCCG	chromosome	849256	851319	PA0781|CDS|-	0	-	-2308
chromosome	859993	860003	PA0048_pwm	9.87288	+	4.31e-06	0.0355	CGGCCAGGCCG	chromosome	859007	860170	PA0787|CDS|-	0	+	0
chromosome	862379	862389	PA0048_pwm	9.87288	+	4.31e-06	0.0355	CGGCCAGGCCG	chromosome	864095	865510	PA0789|CDS|-	0	+	-1707
chromosome	905046	905056	PA0048_pwm	9.87288	-	4.31e-06	0.0355	CGGCAAGGCCA	chromosome	904768	905601	PA0830|CDS|-	0	-	0
chromosome	948167	948177	PA0048_pwm	9.87288	-	4.31e-06	0.0355	CGGCCAGGCCG	chromosome	944724	945512	PA0864|CDS|-	0	-	-2656
chromosome	949639	949649	PA0048_pwm	9.87288	+	4.31e-06	0.0355	CGGCAAGGCCA	chromosome	949280	949693	PA0868|CDS|-	0	+	0
chromosome	951153	951163	PA0048_pwm	9.87288	+	4.31e-06	0.0355	CGGCCAGGCCG	chromosome	953691	955250	PA0873|CDS|phhR	0	+	-2529
chromosome	975207	975217	PA0048_pwm	9.87288	+	4.31e-06	0.0355	CGGCCAGGCCG	chromosome	974482	975594	PA0891|CDS|-	0	+	0
chromosome	982630	982640	PA0048_pwm	9.87288	-	4.31e-06	0.0355	CGGCCAGGCCG	chromosome	977420	977743	PA0894|CDS|-	0	-	-4888
chromosome	988239	988249	PA0048_pwm	9.87288	+	4.31e-06	0.0355	CGGCCAGGCCG	chromosome	986818	989442	PA0903|CDS|alaS	0	+	0
chromosome	994069	994079	PA0048_pwm	9.87288	-	4.31e-06	0.0355	CGGCCAGGCCG	chromosome	991830	992543	PA0906|CDS|alpR	0	-	-1527
chromosome	1004658	1004668	PA0048_pwm	9.87288	-	4.31e-06	0.0355	TGGCCTGACCG	chromosome	1003966	1006611	PA0920|CDS|-	0	-	0
chromosome	1024318	1024328	PA0048_pwm	9.87288	+	4.31e-06	0.0355	CGGCCATGCCA	chromosome	1023053	1025296	PA0934|antibiotic resistance	0	+	0
chromosome	1024318	1024328	PA0048_pwm	9.87288	+	4.31e-06	0.0355	CGGCCATGCCA	chromosome	1023053	1025296	PA0934|CDS|relA	0	+	0
chromosome	1024318	1024328	PA0048_pwm	9.87288	+	4.31e-06	0.0355	CGGCCATGCCA	chromosome	1023053	1025296	PA0934|ROS	0	+	0
chromosome	1024318	1024328	PA0048_pwm	9.87288	+	4.31e-06	0.0355	CGGCCATGCCA	chromosome	1023053	1025296	PA0934|SR and persisters	0	+	0
chromosome	1087639	1087649	PA0048_pwm	9.87288	+	4.31e-06	0.0355	CGGCCAGGCCG	chromosome	1087843	1088901	PA1004|CDS|nadA	0	+	-195
chromosome	1107518	1107528	PA0048_pwm	9.87288	-	4.31e-06	0.0355	CGGCCAGGCCG	chromosome	1098328	1099128	PA1015|CDS|-	0	-	-8391
chromosome	1148140	1148150	PA0048_pwm	9.87288	-	4.31e-06	0.0355	CGGCCAGGCCG	chromosome	1128857	1129321	PA1044|CDS|-	0	-	-18820
chromosome	1160264	1160274	PA0048_pwm	9.87288	+	4.31e-06	0.0355	CGGCCAGGCCG	chromosome	1163276	1163593	PA1075|CDS|-	0	+	-3003
chromosome	1171235	1171245	PA0048_pwm	9.87288	-	4.31e-06	0.0355	CGGCCAGGCCG	chromosome	1161856	1162977	PA1074|CDS|braC	0	-	-8259
chromosome	1186779	1186789	PA0048_pwm	9.87288	+	4.31e-06	0.0355	CGGCAAGGCCA	chromosome	1186606	1186986	PA1095|CDS|-	0	+	0
chromosome	1186779	1186789	PA0048_pwm	9.87288	+	4.31e-06	0.0355	CGGCAAGGCCA	chromosome	1186606	1186986	PA1095|motility	0	+	0
chromosome	1200672	1200682	PA0048_pwm	9.87288	+	4.31e-06	0.0355	CGGCCAGGCCG	chromosome	1201310	1202089	PA1109|CDS|-	0	+	-629
chromosome	1205998	1206008	PA0048_pwm	9.87288	-	4.31e-06	0.0355	CGGCCAGGCCG	chromosome	1205031	1205330	PA1112.1|ncRNA|-	0	-	-669
chromosome	1222103	1222113	PA0048_pwm	9.87288	-	4.31e-06	0.0355	CGGCAAGGCCA	chromosome	1222095	1223072	PA1130|CDS|rhlC	0	-	0
chromosome	1222103	1222113	PA0048_pwm	9.87288	-	4.31e-06	0.0355	CGGCAAGGCCA	chromosome	1222095	1223072	PA1130|QS	0	-	0
chromosome	1230491	1230501	PA0048_pwm	9.87288	-	4.31e-06	0.0355	CGGCAAGGCCA	chromosome	1228212	1229198	PA1137|CDS|-	0	-	-1294
chromosome	1266440	1266450	PA0048_pwm	9.87288	+	4.31e-06	0.0355	CGGCCAGGCCG	chromosome	1266111	1266782	PA1167|CDS|-	0	+	0
chromosome	1279600	1279610	PA0048_pwm	9.87288	-	4.31e-06	0.0355	CGGCCAGGCCG	chromosome	1276617	1276784	PA1177|CDS|napE	0	-	-2817
chromosome	1312210	1312220	PA0048_pwm	9.87288	+	4.31e-06	0.0355	CGGCCAGGCCG	chromosome	1327024	1327803	PA1224|CDS|-	0	+	-14805
chromosome	1323101	1323111	PA0048_pwm	9.87288	-	4.31e-06	0.0355	CGGCAAGGCCA	chromosome	1322253	1324109	PA1221|CDS|-	0	-	0
chromosome	1328286	1328296	PA0048_pwm	9.87288	+	4.31e-06	0.0355	CGGCCAGGCCG	chromosome	1328545	1329153	PA1226|CDS|-	0	+	-250
chromosome	1376043	1376053	PA0048_pwm	9.87288	+	4.31e-06	0.0355	CGGCCAGGCCG	chromosome	1379413	1381452	PA1270|CDS|-	0	+	-3361
chromosome	1387835	1387845	PA0048_pwm	9.87288	-	4.31e-06	0.0355	CGGCCAGGCCG	chromosome	1378500	1379168	PA1269|CDS|-	0	-	-8668
chromosome	1392109	1392119	PA0048_pwm	9.87288	-	4.31e-06	0.0355	CGGCCAGGCCG	chromosome	1378500	1379168	PA1269|CDS|-	0	-	-12942
chromosome	1392445	1392455	PA0048_pwm	9.87288	-	4.31e-06	0.0355	CGGCCAGGCCG	chromosome	1378500	1379168	PA1269|CDS|-	0	-	-13278
chromosome	1399254	1399264	PA0048_pwm	9.87288	-	4.31e-06	0.0355	TGGCCTGACCG	chromosome	1399231	1400505	PA1288|CDS|-	0	-	0
chromosome	1426588	1426598	PA0048_pwm	9.87288	-	4.31e-06	0.0355	CGGCCAGGCCG	chromosome	1425755	1425911	PA1315_promoter|siderophore	0	-	-678
chromosome	1447393	1447403	PA0048_pwm	9.87288	-	4.31e-06	0.0355	CGGCCAGGCCG	chromosome	1447226	1448503	PA1335|CDS|aauR	0	-	0
chromosome	1467182	1467192	PA0048_pwm	9.87288	-	4.31e-06	0.0355	CGGCCAGGCCG	chromosome	1466109	1467320	PA1352|CDS|-	0	-	0
chromosome	1517793	1517803	PA0048_pwm	9.87288	+	4.31e-06	0.0355	CGGCCAGGCCG	chromosome	1518914	1519546	PA1397|CDS|-	0	+	-1112
chromosome	1523205	1523215	PA0048_pwm	9.87288	-	4.31e-06	0.0355	CGGCCAGGCCG	chromosome	1519984	1520904	PA1399|CDS|-	0	-	-2302
chromosome	1524327	1524337	PA0048_pwm	9.87288	-	4.31e-06	0.0355	CGGCCAGGCCG	chromosome	1519984	1520904	PA1399|CDS|-	0	-	-3424
chromosome	1544429	1544439	PA0048_pwm	9.87288	+	4.31e-06	0.0355	CGGCCAGGCCG	chromosome	1547437	1548330	PA1422|CDS|gbuR	0	+	-2999
chromosome	1600355	1600365	PA0048_pwm	9.87288	-	4.31e-06	0.0355	CGGCCAGGCCG	chromosome	1600083	1600418	PA1473|CDS|-	0	-	0
chromosome	1631423	1631433	PA0048_pwm	9.87288	-	4.31e-06	0.0355	CGGCCAGGCCG	chromosome	1630902	1632677	PA1502|CDS|gcl	0	-	0
chromosome	1664072	1664082	PA0048_pwm	9.87288	+	4.31e-06	0.0355	CGGCCAGGCCG	chromosome	1661412	1664900	PA1527|CDS|-	0	+	0
chromosome	1666414	1666424	PA0048_pwm	9.87288	-	4.31e-06	0.0355	CGGCCAGGCCG	chromosome	1659413	1660546	PA1525|CDS|alkB2	0	-	-5869
chromosome	1671641	1671651	PA0048_pwm	9.87288	-	4.31e-06	0.0355	CGGCCAGGCCG	chromosome	1669086	1669952	PA1531|CDS|-	0	-	-1690
chromosome	1672091	1672101	PA0048_pwm	9.87288	-	4.31e-06	0.0355	CGGCCATGCCA	chromosome	1669086	1669952	PA1531|CDS|-	0	-	-2140
chromosome	1681199	1681209	PA0048_pwm	9.87288	+	4.31e-06	0.0355	CGGCCAGGCCG	chromosome	1682051	1682518	PA1545|CDS|-	0	+	-843
chromosome	1684550	1684560	PA0048_pwm	9.87288	+	4.31e-06	0.0355	CGGCCAGGCCG	chromosome	1696467	1697099	PA1558|CDS|-	0	+	-11908
chromosome	1685615	1685625	PA0048_pwm	9.87288	-	4.31e-06	0.0355	CGGCCAGGCCG	chromosome	1684941	1687376	PA1549|CDS|copA2	0	-	0
chromosome	1688754	1688764	PA0048_pwm	9.87288	-	4.31e-06	0.0355	CGGCCAGGCCG	chromosome	1687924	1689339	PA1551|CDS|-	0	-	0
chromosome	1699380	1699390	PA0048_pwm	9.87288	+	4.31e-06	0.0355	CGGCCAGGCCG	chromosome	1703379	1704437	PA1563|CDS|-	0	+	-3990
chromosome	1702173	1702183	PA0048_pwm	9.87288	+	4.31e-06	0.0355	CGGCCAGGCCG	chromosome	1703379	1704437	PA1563|CDS|-	0	+	-1197
chromosome	1717912	1717922	PA0048_pwm	9.87288	-	4.31e-06	0.0355	CGGCCAGGCCG	chromosome	1716682	1717023	PA1577|CDS|-	0	-	-890
chromosome	1735675	1735685	PA0048_pwm	9.87288	+	4.31e-06	0.0355	CGGCCAGGCCG	chromosome	1735236	1735709	PA1593|CDS|-	0	+	0
chromosome	1759341	1759351	PA0048_pwm	9.87288	-	4.31e-06	0.0355	CGGCCAGGCCG	chromosome	1756489	1758597	PA1613|CDS|-	0	-	-745
chromosome	1787693	1787703	PA0048_pwm	9.87288	-	4.31e-06	0.0355	CGGCCAGGCCG	chromosome	1785736	1786773	PA1640|CDS|-	0	-	-921
chromosome	1791397	1791407	PA0048_pwm	9.87288	-	4.31e-06	0.0355	CGGCCATGCCA	chromosome	1790472	1790879	PA1645|CDS|-	0	-	-519
chromosome	1821548	1821558	PA0048_pwm	9.87288	+	4.31e-06	0.0355	CGGCAAGGCCA	chromosome	1819074	1822601	PA1669|CDS|icmF2	0	+	0
chromosome	1829275	1829285	PA0048_pwm	9.87288	-	4.31e-06	0.0355	TGGCCTGACCG	chromosome	1828931	1829710	PA1679|CDS|-	0	-	0
chromosome	1841453	1841463	PA0048_pwm	9.87288	-	4.31e-06	0.0355	CGGCAAGGCCA	chromosome	1840468	1841517	PA1690|CDS|pscU	0	-	0
chromosome	1841453	1841463	PA0048_pwm	9.87288	-	4.31e-06	0.0355	CGGCAAGGCCA	chromosome	1840468	1841517	PA1690|T3SS	0	-	0
chromosome	1855283	1855293	PA0048_pwm	9.87288	+	4.31e-06	0.0355	CGGCAAGGCCA	chromosome	1854849	1855736	PA1709|CDS|popD	0	+	0
chromosome	1855283	1855293	PA0048_pwm	9.87288	+	4.31e-06	0.0355	CGGCAAGGCCA	chromosome	1854849	1855736	PA1709|T3SS	0	+	0
chromosome	1868157	1868167	PA0048_pwm	9.87288	+	4.31e-06	0.0355	CGGCCAGGCCG	chromosome	1871116	1871457	PA1728|CDS|-	0	+	-2950
chromosome	1910120	1910130	PA0048_pwm	9.87288	-	4.31e-06	0.0355	CGGCAAGGCCA	chromosome	1909698	1910681	PA1766|CDS|-	0	-	0
chromosome	1920169	1920179	PA0048_pwm	9.87288	-	4.31e-06	0.0355	CGGCCAGGCCG	chromosome	1913047	1913871	PA1769|CDS|-	0	-	-6299
chromosome	1931295	1931305	PA0048_pwm	9.87288	+	4.31e-06	0.0355	CGGCCAGGCCG	chromosome	1938026	1938493	PA1788|CDS|-	0	+	-6722
chromosome	1936582	1936592	PA0048_pwm	9.87288	-	4.31e-06	0.0355	TGGCCTGACCG	chromosome	1935035	1937644	PA1787|CDS|acnB	0	-	0
chromosome	1965087	1965097	PA0048_pwm	9.87288	+	4.31e-06	0.0355	CGGCAAGGCCA	chromosome	1972195	1972956	PA1814|CDS|kerV	0	+	-7099
chromosome	1969408	1969418	PA0048_pwm	9.87288	+	4.31e-06	0.0355	CGGCCAGGCCG	chromosome	1972195	1972956	PA1814|CDS|kerV	0	+	-2778
chromosome	1987570	1987580	PA0048_pwm	9.87288	-	4.31e-06	0.0355	CGGCAAGGCCA	chromosome	1986989	1987756	PA1828|CDS|-	0	-	0
chromosome	1991372	1991382	PA0048_pwm	9.87288	-	4.31e-06	0.0355	CGGCCAGGCCG	chromosome	1989484	1990194	PA1831|CDS|-	0	-	-1179
chromosome	2002099	2002109	PA0048_pwm	9.87288	-	4.31e-06	0.0355	CGGCCAGGCCG	chromosome	1999889	2003593	PA1843|CDS|metH	0	-	0
chromosome	2005571	2005581	PA0048_pwm	9.87288	+	4.31e-06	0.0355	CGGCCAGGCCG	chromosome	2005254	2007542	PA1846|CDS|cti	0	+	0
chromosome	2006449	2006459	PA0048_pwm	9.87288	-	4.31e-06	0.0355	CGGCAAGGCCA	chromosome	2004893	2005253	PA1844_promoter|T6SS	0	-	-1197
chromosome	2012735	2012745	PA0048_pwm	9.87288	+	4.31e-06	0.0355	CGGCCAGGCCG	chromosome	2012815	2013678	PA1853|CDS|-	0	+	-71
chromosome	2023403	2023413	PA0048_pwm	9.87288	-	4.31e-06	0.0355	CGGCCAGGCCG	chromosome	2023281	2023931	PA1864|CDS|-	0	-	0
chromosome	2036989	2036999	PA0048_pwm	9.87288	+	4.31e-06	0.0355	CGGCCAGGCCG	chromosome	2036441	2043847	PA1874|CDS|-	0	+	0
chromosome	2061559	2061569	PA0048_pwm	9.87288	+	4.31e-06	0.0355	CGGCCAGGCCG	chromosome	2068729	2069489	PA1898_promoter|QS	0	+	-7161
chromosome	2062898	2062908	PA0048_pwm	9.87288	-	4.31e-06	0.0355	CGGCCAGGCCG	chromosome	2062398	2064827	PA1893|CDS|-	0	-	0
chromosome	2067349	2067359	PA0048_pwm	9.87288	+	4.31e-06	0.0355	CGGCCAGGCCG	chromosome	2068729	2069489	PA1898_promoter|QS	0	+	-1371
chromosome	2073686	2073696	PA0048_pwm	9.87288	-	4.31e-06	0.0355	CGGCCAGGCCG	chromosome	2067961	2068728	PA1897|CDS|-	0	-	-4959
chromosome	2133474	2133484	PA0048_pwm	9.87288	-	4.31e-06	0.0355	CGGCCAGGCCG	chromosome	2126396	2127493	PA1943|CDS|-	0	-	-5982
chromosome	2136287	2136297	PA0048_pwm	9.87288	+	4.31e-06	0.0355	CGGCCAGGCCG	chromosome	2135460	2136386	PA1950|CDS|rbsK	0	+	0
chromosome	2145826	2145836	PA0048_pwm	9.87288	-	4.31e-06	0.0355	CGGCAAGGCCA	chromosome	2144810	2145745	PA1961|CDS|-	0	-	-82
chromosome	2180117	2180127	PA0048_pwm	9.87288	+	4.31e-06	0.0355	CGGCCAGGCCG	chromosome	2185527	2186225	PA1999|CDS|dhcA	0	+	-5401
chromosome	2243366	2243376	PA0048_pwm	9.87288	+	4.31e-06	0.0355	CGGCCAGGCCG	chromosome	2243604	2244491	PA2050_promoter|siderophore	0	+	-229
chromosome	2282536	2282546	PA0048_pwm	9.87288	+	4.31e-06	0.0355	CGGCCAGGCCG	chromosome	2282480	2283382	PA2076|CDS|-	0	+	0
chromosome	2284280	2284290	PA0048_pwm	9.87288	+	4.31e-06	0.0355	CGGCCAGGCCG	chromosome	2291113	2291589	PA2082|CDS|kynR	0	+	-6824
chromosome	2286224	2286234	PA0048_pwm	9.87288	+	4.31e-06	0.0355	CGGCCAGGCCG	chromosome	2291113	2291589	PA2082|CDS|kynR	0	+	-4880
chromosome	2353678	2353688	PA0048_pwm	9.87288	+	4.31e-06	0.0355	CGGCCAGGCCG	chromosome	2353086	2355608	PA2138|CDS|ligD	0	+	0
chromosome	2376732	2376742	PA0048_pwm	9.87288	-	4.31e-06	0.0355	CGGCCAGGCCG	chromosome	2376538	2377476	PA2157|CDS|-	0	-	0
chromosome	2381700	2381710	PA0048_pwm	9.87288	-	4.31e-06	0.0355	CGGCCAGGCCG	chromosome	2381473	2381778	PA2161|CDS|-	0	-	0
chromosome	2383604	2383614	PA0048_pwm	9.87288	+	4.31e-06	0.0355	CGGCCAGGCCG	chromosome	2390255	2390620	PA2166|CDS|-	0	+	-6642
chromosome	2385876	2385886	PA0048_pwm	9.87288	+	4.31e-06	0.0355	CGGCCAGGCCG	chromosome	2390255	2390620	PA2166|CDS|-	0	+	-4370
chromosome	2386912	2386922	PA0048_pwm	9.87288	+	4.31e-06	0.0355	CGGCCAGGCCG	chromosome	2390255	2390620	PA2166|CDS|-	0	+	-3334
chromosome	2398330	2398340	PA0048_pwm	9.87288	-	4.31e-06	0.0355	CGGCCAGGCCG	chromosome	2396896	2397486	PA2176|CDS|-	0	-	-845
chromosome	2422180	2422190	PA0048_pwm	9.87288	+	4.31e-06	0.0355	CGGCCAGGCCG	chromosome	2428852	2430177	PA2210|CDS|-	0	+	-6663
chromosome	2430844	2430854	PA0048_pwm	9.87288	+	4.31e-06	0.0355	CGGCCAGGCCG	chromosome	2430170	2431129	PA2211|CDS|-	0	+	0
chromosome	2452396	2452406	PA0048_pwm	9.87288	+	4.31e-06	0.0355	CGGCCAGGCCG	chromosome	2451707	2452426	PA2229|CDS|-	0	+	0
chromosome	2470605	2470615	PA0048_pwm	9.87288	-	4.31e-06	0.0355	CGGCCAGGCCG	chromosome	2450766	2451706	PA2226_promoter|QS	0	-	-18900
chromosome	2470605	2470615	PA0048_pwm	9.87288	-	4.31e-06	0.0355	CGGCCAGGCCG	chromosome	2450766	2451706	PA2227_promoter|antibiotic resistance	0	-	-18900
chromosome	2470605	2470615	PA0048_pwm	9.87288	-	4.31e-06	0.0355	CGGCCAGGCCG	chromosome	2450766	2451706	PA2227_promoter|QS	0	-	-18900
chromosome	2470605	2470615	PA0048_pwm	9.87288	-	4.31e-06	0.0355	CGGCCAGGCCG	chromosome	2450766	2451706	PA2227_promoter|T3SS	0	-	-18900
chromosome	2472328	2472338	PA0048_pwm	9.87288	-	4.31e-06	0.0355	CGGCAAGGCCA	chromosome	2450766	2451706	PA2226_promoter|QS	0	-	-20623
chromosome	2472328	2472338	PA0048_pwm	9.87288	-	4.31e-06	0.0355	CGGCAAGGCCA	chromosome	2450766	2451706	PA2227_promoter|antibiotic resistance	0	-	-20623
chromosome	2472328	2472338	PA0048_pwm	9.87288	-	4.31e-06	0.0355	CGGCAAGGCCA	chromosome	2450766	2451706	PA2227_promoter|QS	0	-	-20623
chromosome	2472328	2472338	PA0048_pwm	9.87288	-	4.31e-06	0.0355	CGGCAAGGCCA	chromosome	2450766	2451706	PA2227_promoter|T3SS	0	-	-20623
chromosome	2479445	2479455	PA0048_pwm	9.87288	+	4.31e-06	0.0355	CGGCCAGGCCG	chromosome	2479299	2480744	PA2252|CDS|-	0	+	0
chromosome	2493310	2493320	PA0048_pwm	9.87288	+	4.31e-06	0.0355	CGGCCATGCCA	chromosome	2493218	2493934	PA2264|CDS|-	0	+	0
chromosome	2545858	2545868	PA0048_pwm	9.87288	+	4.31e-06	0.0355	CGGCCAGGCCG	chromosome	2549748	2549906	PA2311|CDS|-	0	+	-3881
chromosome	2548338	2548348	PA0048_pwm	9.87288	-	4.31e-06	0.0355	CGGCCAGGCCG	chromosome	2547508	2548530	PA2309|CDS|-	0	-	0
chromosome	2548338	2548348	PA0048_pwm	9.87288	-	4.31e-06	0.0355	CGGCCAGGCCG	chromosome	2547508	2548530	PA2309|siderophore	0	-	0
chromosome	2553697	2553707	PA0048_pwm	9.87288	+	4.31e-06	0.0355	CGGCCAGGCCG	chromosome	2553965	2554858	PA2316|CDS|-	0	+	-259
chromosome	2599832	2599842	PA0048_pwm	9.87288	-	4.31e-06	0.0355	CGGCCAGGCCG	chromosome	2590430	2591665	PA2345|CDS|-	0	-	-8168
chromosome	2638772	2638782	PA0048_pwm	9.87288	+	4.31e-06	0.0355	CGGCCAGGCCG	chromosome	2640872	2641034	PA2388_promoter|siderophore	0	+	-2091
chromosome	2645105	2645115	PA0048_pwm	9.87288	-	4.31e-06	0.0355	CGGCCAGGCCG	chromosome	2640872	2641034	PA2387_promoter|siderophore	0	-	-4072
chromosome	2645383	2645393	PA0048_pwm	9.87288	-	4.31e-06	0.0355	CGGCCAGGCCG	chromosome	2640872	2641034	PA2387_promoter|siderophore	0	-	-4350
chromosome	2705084	2705094	PA0048_pwm	9.87288	-	4.31e-06	0.0355	CGGCCAGGCCG	chromosome	2700167	2701105	PA2417|CDS|-	0	-	-3980
chromosome	2706112	2706122	PA0048_pwm	9.87288	-	4.31e-06	0.0355	CGGCCAGGCCG	chromosome	2700167	2701105	PA2417|CDS|-	0	-	-5008
chromosome	2730038	2730048	PA0048_pwm	9.87288	+	4.31e-06	0.0355	CGGCCAGGCCG	chromosome	2737882	2738844	PA2440|CDS|-	0	+	-7835
chromosome	2730368	2730378	PA0048_pwm	9.87288	-	4.31e-06	0.0355	CGGCCAGGCCG	chromosome	2729976	2730521	PA2434|CDS|-	0	-	0
chromosome	2735697	2735707	PA0048_pwm	9.87288	-	4.31e-06	0.0355	CGGCCAGGCCG	chromosome	2735194	2737194	PA2439|CDS|-	0	-	0
chromosome	2737223	2737233	PA0048_pwm	9.87288	+	4.31e-06	0.0355	CGGCCAGGCCG	chromosome	2737882	2738844	PA2440|CDS|-	0	+	-650
chromosome	2738008	2738018	PA0048_pwm	9.87288	+	4.31e-06	0.0355	CGGCAAGGCCA	chromosome	2737882	2738844	PA2440|CDS|-	0	+	0
chromosome	2773365	2773375	PA0048_pwm	9.87288	-	4.31e-06	0.0355	CGGCAAGGCCA	chromosome	2761921	2778804	PA2462|CDS|-	0	-	0
chromosome	2817472	2817482	PA0048_pwm	9.87288	+	4.31e-06	0.0355	CGGCCAGGCCG	chromosome	2817449	2818675	PA2500|CDS|-	0	+	0
chromosome	2826710	2826720	PA0048_pwm	9.87288	+	4.31e-06	0.0355	CGGCCAGGCCG	chromosome	2827241	2828113	PA2510|CDS|catR	0	+	-522
chromosome	2831208	2831218	PA0048_pwm	9.87288	+	4.31e-06	0.0355	CGGCCATGCCA	chromosome	2830831	2831322	PA2513|CDS|antB	0	+	0
chromosome	2831208	2831218	PA0048_pwm	9.87288	+	4.31e-06	0.0355	CGGCCATGCCA	chromosome	2830831	2831322	PA2513|QS	0	+	0
chromosome	2859884	2859894	PA0048_pwm	9.87288	+	4.31e-06	0.0355	CGGCCAGGCCG	chromosome	2862944	2863939	PA2535|CDS|-	0	+	-3051
chromosome	2862072	2862082	PA0048_pwm	9.87288	+	4.31e-06	0.0355	CGGCCAGGCCG	chromosome	2862944	2863939	PA2535|CDS|-	0	+	-863
chromosome	2876008	2876018	PA0048_pwm	9.87288	+	4.31e-06	0.0355	CGGCCAGGCCG	chromosome	2876555	2877367	PA2545|CDS|xthA	0	+	-538
chromosome	2886860	2886870	PA0048_pwm	9.87288	-	4.31e-06	0.0355	CGGCCAGGCCG	chromosome	2886570	2887337	PA2554|CDS|-	0	-	0
chromosome	2889655	2889665	PA0048_pwm	9.87288	+	4.31e-06	0.0355	CGGCAAGGCCA	chromosome	2892271	2892963	PA2558|CDS|-	0	+	-2607
chromosome	2926333	2926343	PA0048_pwm	9.87288	-	4.31e-06	0.0355	CGGCCAGGCCG	chromosome	2925788	2926432	PA2586|biofilm	0	-	0
chromosome	2926333	2926343	PA0048_pwm	9.87288	-	4.31e-06	0.0355	CGGCCAGGCCG	chromosome	2925788	2926432	PA2586|CDS|gacA	0	-	0
chromosome	2926333	2926343	PA0048_pwm	9.87288	-	4.31e-06	0.0355	CGGCCAGGCCG	chromosome	2925788	2926432	PA2586|motility	0	-	0
chromosome	2926333	2926343	PA0048_pwm	9.87288	-	4.31e-06	0.0355	CGGCCAGGCCG	chromosome	2925788	2926432	PA2586|QS	0	-	0
chromosome	2926333	2926343	PA0048_pwm	9.87288	-	4.31e-06	0.0355	CGGCCAGGCCG	chromosome	2925788	2926432	PA2586|T3SS	0	-	0
chromosome	2926333	2926343	PA0048_pwm	9.87288	-	4.31e-06	0.0355	CGGCCAGGCCG	chromosome	2925788	2926432	PA2586|T6SS	0	-	0
chromosome	2940636	2940646	PA0048_pwm	9.87288	+	4.31e-06	0.0355	CGGCAAGGCCA	chromosome	2945264	2945869	PA2602|CDS|-	0	+	-4619
chromosome	2942037	2942047	PA0048_pwm	9.87288	-	4.31e-06	0.0355	CGGCCAGGCCG	chromosome	2941894	2942838	PA2599|CDS|-	0	-	0
chromosome	2953526	2953536	PA0048_pwm	9.87288	+	4.31e-06	0.0355	CGGCCAGGCCG	chromosome	2959468	2960418	PA2616|CDS|trxB1	0	+	-5933
chromosome	3030540	3030550	PA0048_pwm	9.87288	+	4.31e-06	0.0355	CGGCCAGGCCG	chromosome	3037686	3037885	PA2686_promoter|siderophore	0	+	-7137
chromosome	3035597	3035607	PA0048_pwm	9.87288	+	4.31e-06	0.0355	CGGCCAGGCCG	chromosome	3037686	3037885	PA2686_promoter|siderophore	0	+	-2080
chromosome	3042900	3042910	PA0048_pwm	9.87288	+	4.31e-06	0.0355	CGGCCAGGCCG	chromosome	3042502	3043416	PA2689|CDS|pfeE	0	+	0
chromosome	3066727	3066737	PA0048_pwm	9.87288	-	4.31e-06	0.0355	CGGCCAGGCCG	chromosome	3061733	3062818	PA2708|CDS|-	0	-	-3910
chromosome	3071480	3071490	PA0048_pwm	9.87288	+	4.31e-06	0.0355	CGGCCAGGCCG	chromosome	3073144	3073632	PA2718|CDS|-	0	+	-1655
chromosome	3083943	3083953	PA0048_pwm	9.87288	-	4.31e-06	0.0355	CGGCCAGGCCG	chromosome	3074580	3075218	PA2720|CDS|-	0	-	-8726
chromosome	3113802	3113812	PA0048_pwm	9.87288	-	4.31e-06	0.0355	CGGCAAGGCCA	chromosome	3109743	3110525	PA2748|CDS|-	0	-	-3278
chromosome	3134861	3134871	PA0048_pwm	9.87288	+	4.31e-06	0.0355	CGGCCAGGCCG	chromosome	3133710	3134993	PA2776|CDS|pauB3	0	+	0
chromosome	3143322	3143332	PA0048_pwm	9.87288	+	4.31e-06	0.0355	CGGCCAGGCCG	chromosome	3143152	3144390	PA2787|CDS|cpg2	0	+	0
chromosome	3145899	3145909	PA0048_pwm	9.87288	+	4.31e-06	0.0355	CGGCCAGGCCG	chromosome	3146251	3147330	PA2789|CDS|-	0	+	-343
chromosome	3157216	3157226	PA0048_pwm	9.87288	+	4.31e-06	0.0355	CGGCCAGGCCG	chromosome	3157667	3158071	PA2801|CDS|-	0	+	-442
chromosome	3159465	3159475	PA0048_pwm	9.87288	-	4.31e-06	0.0355	CGGCCAGGCCG	chromosome	3158073	3158792	PA2802|CDS|-	0	-	-674
chromosome	3167662	3167672	PA0048_pwm	9.87288	+	4.31e-06	0.0355	CGGCCAGGCCG	chromosome	3168106	3170553	PA2815|CDS|-	0	+	-435
chromosome	3183786	3183796	PA0048_pwm	9.87288	-	4.31e-06	0.0355	CGGCCAGGCCG	chromosome	3180554	3180952	PA2827|CDS|-	0	-	-2835
chromosome	3241205	3241215	PA0048_pwm	9.87288	+	4.31e-06	0.0355	CGGCAAGGCCA	chromosome	3240591	3242207	PA2888|CDS|atuC	0	+	0
chromosome	3245790	3245800	PA0048_pwm	9.87288	-	4.31e-06	0.0355	CGGCCAGGCCG	chromosome	3236959	3237555	PA2885|CDS|atuR	0	-	-8236
chromosome	3251178	3251188	PA0048_pwm	9.87288	+	4.31e-06	0.0355	CGGCCAGGCCG	chromosome	3261522	3262769	PA2907|CDS|cobL	0	+	-10335
chromosome	3257655	3257665	PA0048_pwm	9.87288	+	4.31e-06	0.0355	CGGCCAGGCCG	chromosome	3261522	3262769	PA2907|CDS|cobL	0	+	-3858
chromosome	3272301	3272311	PA0048_pwm	9.87288	+	4.31e-06	0.0355	CGGCCAGGCCG	chromosome	3273504	3274277	PA2918|CDS|-	0	+	-1194
chromosome	3278245	3278255	PA0048_pwm	9.87288	+	4.31e-06	0.0355	CGGCCAGGCCG	chromosome	3277409	3278578	PA2922|CDS|-	0	+	0
chromosome	3293706	3293716	PA0048_pwm	9.87288	-	4.31e-06	0.0355	CGGCCAGGCCG	chromosome	3292324	3293781	PA2938|CDS|-	0	-	0
chromosome	3306959	3306969	PA0048_pwm	9.87288	-	4.31e-06	0.0355	CGGCCAGGCCG	chromosome	3304437	3305564	PA2945|CDS|-	0	-	-1396
chromosome	3315043	3315053	PA0048_pwm	9.87288	-	4.31e-06	0.0355	CGGCAAGGCCA	chromosome	3314495	3315064	PA2954|CDS|-	0	-	0
chromosome	3347914	3347924	PA0048_pwm	9.87288	-	4.31e-06	0.0355	CGGCCAGGCCG	chromosome	3345789	3347039	PA2988|CDS|lolE	0	-	-876
chromosome	3354273	3354283	PA0048_pwm	9.87288	+	4.31e-06	0.0355	CGGCCAGGCCG	chromosome	3360655	3360874	PA3003_promoter|antibiotic resistance	0	+	-6373
chromosome	3358195	3358205	PA0048_pwm	9.87288	+	4.31e-06	0.0355	CGGCCAGGCCG	chromosome	3360655	3360874	PA3003_promoter|antibiotic resistance	0	+	-2451
chromosome	3375872	3375882	PA0048_pwm	9.87288	-	4.31e-06	0.0355	CGGCCAGGCCG	chromosome	3374460	3376607	PA3014|CDS|faoA	0	-	0
chromosome	3389756	3389766	PA0048_pwm	9.87288	+	4.31e-06	0.0355	CGGCCAGGCCG	chromosome	3391208	3392239	PA3027|CDS|-	0	+	-1443
chromosome	3405869	3405879	PA0048_pwm	9.87288	+	4.31e-06	0.0355	CGGCAAGGCCA	chromosome	3404979	3406310	PA3043|CDS|-	0	+	0
chromosome	3410928	3410938	PA0048_pwm	9.87288	-	4.31e-06	0.0355	CGGCCAGGCCG	chromosome	3409609	3409953	PA3046|CDS|-	0	-	-976
chromosome	3450939	3450949	PA0048_pwm	9.87288	+	4.31e-06	0.0355	CGGCCAGGCCG	chromosome	3450838	3451509	PA3077|CDS|cprR	0	+	0
chromosome	3455850	3455860	PA0048_pwm	9.87288	+	4.31e-06	0.0355	CGGCCAGGCCG	chromosome	3467085	3468050	PA3089|CDS|-	0	+	-11226
chromosome	3471627	3471637	PA0048_pwm	9.87288	+	4.31e-06	0.0355	CGGCCAGGCCG	chromosome	3473018	3474136	PA3093|CDS|-	0	+	-1382
chromosome	3496303	3496313	PA0048_pwm	9.87288	+	4.31e-06	0.0355	CGGCCAGGCCG	chromosome	3504879	3505772	PA3122|CDS|-	0	+	-8567
chromosome	3562237	3562247	PA0048_pwm	9.87288	-	4.31e-06	0.0355	CGGCCAGGCCG	chromosome	3559435	3560511	PA3169|CDS|-	0	-	-1727
chromosome	3572253	3572263	PA0048_pwm	9.87288	+	4.31e-06	0.0355	CGGCCAGGCCG	chromosome	3573794	3573979	PA3184_promoter|ROS	0	+	-1532
chromosome	3586277	3586287	PA0048_pwm	9.87288	-	4.31e-06	0.0355	CGGCCAGGCCG	chromosome	3585477	3587303	PA3194|CDS|edd	0	-	0
chromosome	3586277	3586287	PA0048_pwm	9.87288	-	4.31e-06	0.0355	CGGCCAGGCCG	chromosome	3585477	3587303	PA3194|ROS	0	-	0
chromosome	3598934	3598944	PA0048_pwm	9.87288	-	4.31e-06	0.0355	CGGCAAGGCCA	chromosome	3598404	3598775	PA3209|CDS|-	0	-	-160
chromosome	3603371	3603381	PA0048_pwm	9.87288	-	4.31e-06	0.0355	CGGCCAGGCCG	chromosome	3598404	3598775	PA3209|CDS|-	0	-	-4597
chromosome	3621966	3621976	PA0048_pwm	9.87288	-	4.31e-06	0.0355	CGGCAAGGCCA	chromosome	3621505	3623160	PA3234|CDS|-	0	-	0
chromosome	3663787	3663797	PA0048_pwm	9.87288	+	4.31e-06	0.0355	CGGCCAGGCCG	chromosome	3668474	3668761	PA3274|CDS|-	0	+	-4678
chromosome	3664765	3664775	PA0048_pwm	9.87288	+	4.31e-06	0.0355	CGGCCAGGCCG	chromosome	3668474	3668761	PA3274|CDS|-	0	+	-3700
chromosome	3674899	3674909	PA0048_pwm	9.87288	+	4.31e-06	0.0355	CGGCCAGGCCG	chromosome	3679946	3680461	PA3287|CDS|-	0	+	-5038
chromosome	3690015	3690025	PA0048_pwm	9.87288	+	4.31e-06	0.0355	CGGCAAGGCCA	chromosome	3689521	3690951	PA3296|CDS|phoA	0	+	0
chromosome	3700028	3700038	PA0048_pwm	9.87288	-	4.31e-06	0.0355	CGGCCAGGCCG	chromosome	3697434	3699122	PA3300|CDS|fadD2	0	-	-907
chromosome	3714269	3714279	PA0048_pwm	9.87288	-	4.31e-06	0.0355	CGGCCAGGCCG	chromosome	3710749	3712404	PA3310|CDS|-	0	-	-1866
chromosome	3755734	3755744	PA0048_pwm	9.87288	+	4.31e-06	0.0355	CGGCCAGGCCG	chromosome	3761830	3761960	PA3350_promoter|motility	0	+	-6087
chromosome	3790557	3790567	PA0048_pwm	9.87288	+	4.31e-06	0.0355	CGGCCAGGCCG	chromosome	3790987	3791346	PA3385_promoter|biofilm	0	+	-421
chromosome	3790557	3790567	PA0048_pwm	9.87288	+	4.31e-06	0.0355	CGGCCAGGCCG	chromosome	3790987	3791346	PA3385_promoter|T3SS	0	+	-421
chromosome	3790557	3790567	PA0048_pwm	9.87288	+	4.31e-06	0.0355	CGGCCAGGCCG	chromosome	3790987	3791346	PA3385_promoter|T6SS	0	+	-421
chromosome	3841503	3841513	PA0048_pwm	9.87288	+	4.31e-06	0.0355	CGGCCAGGCCG	chromosome	3840844	3841737	PA3433|CDS|-	0	+	0
chromosome	3847487	3847497	PA0048_pwm	9.87288	-	4.31e-06	0.0355	CGGCCAGGCCG	chromosome	3843653	3844105	PA3435|CDS|-	0	-	-3383
chromosome	3848402	3848412	PA0048_pwm	9.87288	+	4.31e-06	0.0355	CGGCCAGGCCG	chromosome	3856337	3856546	PA3451|CDS|-	0	+	-7926
chromosome	3863097	3863107	PA0048_pwm	9.87288	-	4.31e-06	0.0355	CGGCCAGGCCG	chromosome	3860675	3862165	PA3455|CDS|-	0	-	-933
chromosome	3892090	3892100	PA0048_pwm	9.87288	+	4.31e-06	0.0355	CGGCCAGGCCG	chromosome	3895324	3897357	PA3482|CDS|metG	0	+	-3225
chromosome	3905386	3905396	PA0048_pwm	9.87288	+	4.31e-06	0.0355	CGGCAAGGCCA	chromosome	3902663	3905962	PA3487|CDS|tle5	0	+	0
chromosome	3905386	3905396	PA0048_pwm	9.87288	+	4.31e-06	0.0355	CGGCAAGGCCA	chromosome	3902663	3905962	PA3487|T6SS	0	+	0
chromosome	3908567	3908577	PA0048_pwm	9.87288	+	4.31e-06	0.0355	CGGCCAGGCCG	chromosome	3908412	3910736	PA3491|CDS|-	0	+	0
chromosome	3994306	3994316	PA0048_pwm	9.87288	+	4.31e-06	0.0355	CGGCCAGGCCG	chromosome	3994739	3995728	PA3563|CDS|fruR	0	+	-424
chromosome	4003616	4003626	PA0048_pwm	9.87288	+	4.31e-06	0.0355	CGGCCAGGCCG	chromosome	4003733	4004656	PA3571|CDS|mmsR	0	+	-108
chromosome	4015860	4015870	PA0048_pwm	9.87288	+	4.31e-06	0.0355	CGGCCAGGCCG	chromosome	4015408	4016163	PA3583|CDS|glpR	0	+	0
chromosome	4029869	4029879	PA0048_pwm	9.87288	-	4.31e-06	0.0355	CGGCCAGGCCG	chromosome	4028540	4028652	PA3589_promoter|SR and persisters	0	-	-1218
chromosome	4080559	4080569	PA0048_pwm	9.87288	+	4.31e-06	0.0355	CGGCCATGCCA	chromosome	4095172	4095957	PA3657|CDS|map	0	+	-14604
chromosome	4087098	4087108	PA0048_pwm	9.87288	+	4.31e-06	0.0355	CGGCCAGGCCG	chromosome	4095172	4095957	PA3657|CDS|map	0	+	-8065
chromosome	4109925	4109935	PA0048_pwm	9.87288	+	4.31e-06	0.0355	CGGCCAGGCCG	chromosome	4112285	4114789	PA3673|CDS|plsB	0	+	-2351
chromosome	4141918	4141928	PA0048_pwm	9.87288	-	4.31e-06	0.0355	TGGCCTGACCG	chromosome	4140884	4142389	PA3700|CDS|lysS	0	-	0
chromosome	4143433	4143443	PA0048_pwm	9.87288	+	4.31e-06	0.0355	CGGCCAGGCCG	chromosome	4156184	4157089	PA3711|CDS|-	0	+	-12742
chromosome	4158475	4158485	PA0048_pwm	9.87288	+	4.31e-06	0.0355	CGGCCATGCCA	chromosome	4158143	4160005	PA3713|CDS|spdH	0	+	0
chromosome	4179797	4179807	PA0048_pwm	9.87288	+	4.31e-06	0.0355	CGGCCAGGCCG	chromosome	4183710	4184939	PA3733|CDS|-	0	+	-3904
chromosome	4179851	4179861	PA0048_pwm	9.87288	+	4.31e-06	0.0355	CGGCCAGGCCG	chromosome	4183710	4184939	PA3733|CDS|-	0	+	-3850
chromosome	4181857	4181867	PA0048_pwm	9.87288	-	4.31e-06	0.0355	CGGCCAGGCCG	chromosome	4181378	4182019	PA3730|CDS|-	0	-	0
chromosome	4198482	4198492	PA0048_pwm	9.87288	-	4.31e-06	0.0355	CGGCAAGGCCA	chromosome	4197169	4198542	PA3746|CDS|ffh	0	-	0
chromosome	4199931	4199941	PA0048_pwm	9.87288	-	4.31e-06	0.0355	CGGCCAGGCCG	chromosome	4197169	4198542	PA3746|CDS|ffh	0	-	-1390
chromosome	4210206	4210216	PA0048_pwm	9.87288	-	4.31e-06	0.0355	CGGCCAGGCCG	chromosome	4205296	4205907	PA3754|CDS|-	0	-	-4300
chromosome	4212508	4212518	PA0048_pwm	9.87288	-	4.31e-06	0.0355	CGGCCAGGCCG	chromosome	4205296	4205907	PA3754|CDS|-	0	-	-6602
chromosome	4231571	4231581	PA0048_pwm	9.87288	-	4.31e-06	0.0355	CGGCCAGGCCG	chromosome	4227317	4228786	PA3770|CDS|guaB	0	-	-2786
chromosome	4232177	4232187	PA0048_pwm	9.87288	-	4.31e-06	0.0355	CGGCCAGGCCG	chromosome	4227317	4228786	PA3770|CDS|guaB	0	-	-3392
chromosome	4294380	4294390	PA0048_pwm	9.87288	-	4.31e-06	0.0355	CGGCAAGGCCA	chromosome	4294255	4294605	PA3835|antibiotic resistance	0	-	0
chromosome	4294380	4294390	PA0048_pwm	9.87288	-	4.31e-06	0.0355	CGGCAAGGCCA	chromosome	4294255	4294605	PA3835|CDS|-	0	-	0
chromosome	4298964	4298974	PA0048_pwm	9.87288	-	4.31e-06	0.0355	CGGCCAGGCCG	chromosome	4294606	4297249	PA3835_promoter|antibiotic resistance	0	-	-1716
chromosome	4303138	4303148	PA0048_pwm	9.87288	-	4.31e-06	0.0355	TGGCCTGACCG	chromosome	4303141	4304502	PA3841|CDS|exoS	0	-	0
chromosome	4303138	4303148	PA0048_pwm	9.87288	-	4.31e-06	0.0355	TGGCCTGACCG	chromosome	4303141	4304502	PA3841|T3SS	0	-	0
chromosome	4330449	4330459	PA0048_pwm	9.87288	-	4.31e-06	0.0355	CGGCCAGGCCG	chromosome	4327697	4329991	PA3866|CDS|-	0	-	-459
chromosome	4342352	4342362	PA0048_pwm	9.87288	-	4.31e-06	0.0355	CGGCCAGGCCG	chromosome	4342122	4343528	PA3876|antibiotic resistance	0	-	0
chromosome	4342352	4342362	PA0048_pwm	9.87288	-	4.31e-06	0.0355	CGGCCAGGCCG	chromosome	4342122	4343528	PA3876|CDS|narK2	0	-	0
chromosome	4343587	4343597	PA0048_pwm	9.87288	-	4.31e-06	0.0355	CGGCCAGGCCG	chromosome	4343540	4344835	PA3877|antibiotic resistance	0	-	0
chromosome	4343587	4343597	PA0048_pwm	9.87288	-	4.31e-06	0.0355	CGGCCAGGCCG	chromosome	4343540	4344835	PA3877|CDS|narK1	0	-	0
chromosome	4343821	4343831	PA0048_pwm	9.87288	-	4.31e-06	0.0355	CGGCAAGGCCA	chromosome	4343540	4344835	PA3877|antibiotic resistance	0	-	0
chromosome	4343821	4343831	PA0048_pwm	9.87288	-	4.31e-06	0.0355	CGGCAAGGCCA	chromosome	4343540	4344835	PA3877|CDS|narK1	0	-	0
chromosome	4344502	4344512	PA0048_pwm	9.87288	+	4.31e-06	0.0355	CGGCCAGGCCG	chromosome	4345010	4346878	PA3878|CDS|narX	0	+	-499
chromosome	4348803	4348813	PA0048_pwm	9.87288	+	4.31e-06	0.0355	CGGCCAGGCCG	chromosome	4348666	4349415	PA3882|CDS|-	0	+	0
chromosome	4356171	4356181	PA0048_pwm	9.87288	+	4.31e-06	0.0355	CGGCCAGGCCG	chromosome	4355266	4356201	PA3889|CDS|opuCC	0	+	0
chromosome	4378736	4378746	PA0048_pwm	9.87288	+	4.31e-06	0.0355	CGGCAAGGCCA	chromosome	4389231	4391609	PA3920|CDS|copA1	0	+	-10486
chromosome	4396712	4396722	PA0048_pwm	9.87288	-	4.31e-06	0.0355	CGGCCAGGCCG	chromosome	4396122	4398047	PA3923|CDS|-	0	-	0
chromosome	4400947	4400957	PA0048_pwm	9.87288	+	4.31e-06	0.0355	CGGCCATGCCA	chromosome	4400123	4401298	PA3925|CDS|-	0	+	0
chromosome	4428591	4428601	PA0048_pwm	9.87288	+	4.31e-06	0.0355	TGGCCTGACCG	chromosome	4428412	4429041	PA3948|CDS|rocA1	0	+	0
chromosome	4432094	4432104	PA0048_pwm	9.87288	-	4.31e-06	0.0355	TGGCCTGACCG	chromosome	4432026	4432529	PA3951|CDS|-	0	-	0
chromosome	4441630	4441640	PA0048_pwm	9.87288	-	4.31e-06	0.0355	CGGCCAGGCCG	chromosome	4439795	4442311	PA3961|CDS|-	0	-	0
chromosome	4443038	4443048	PA0048_pwm	9.87288	+	4.31e-06	0.0355	CGGCAAGGCCA	chromosome	4442958	4443854	PA3963|CDS|-	0	+	0
chromosome	4498315	4498325	PA0048_pwm	9.87288	+	4.31e-06	0.0355	CGGCAAGGCCA	chromosome	4502271	4503791	PA4022|CDS|hdhA	0	+	-3947
chromosome	4504933	4504943	PA0048_pwm	9.87288	-	4.31e-06	0.0355	CGGCCAGGCCG	chromosome	4500001	4501932	PA4021|CDS|eatR	0	-	-3002
chromosome	4509199	4509209	PA0048_pwm	9.87288	+	4.31e-06	0.0355	CGGCCAGGCCG	chromosome	4508408	4509301	PA4027|CDS|-	0	+	0
chromosome	4513242	4513252	PA0048_pwm	9.87288	-	4.31e-06	0.0355	TGGCCTGACCG	chromosome	4513168	4513884	PA4032|CDS|-	0	-	0
chromosome	4520332	4520342	PA0048_pwm	9.87288	+	4.31e-06	0.0355	CGGCCAGGCCG	chromosome	4520198	4520932	PA4038|CDS|-	0	+	0
chromosome	4533003	4533013	PA0048_pwm	9.87288	-	4.31e-06	0.0355	CGGCAAGGCCA	chromosome	4532653	4533621	PA4051|CDS|thiL	0	-	0
chromosome	4572436	4572446	PA0048_pwm	9.87288	+	4.31e-06	0.0355	CGGCCAGGCCG	chromosome	4572311	4573072	PA4089|CDS|-	0	+	0
chromosome	4616230	4616240	PA0048_pwm	9.87288	-	4.31e-06	0.0355	CGGCCAGGCCG	chromosome	4608436	4609347	PA4120|CDS|-	0	-	-6884
chromosome	4638513	4638523	PA0048_pwm	9.87288	-	4.31e-06	0.0355	CGGCCAGGCCG	chromosome	4627947	4629185	PA4138|CDS|tyrS	0	-	-9329
chromosome	4640500	4640510	PA0048_pwm	9.87288	-	4.31e-06	0.0355	CGGCCAGGCCG	chromosome	4639502	4641379	PA4147|CDS|acoR	0	-	0
chromosome	4648239	4648249	PA0048_pwm	9.87288	-	4.31e-06	0.0355	CGGCCAGGCCG	chromosome	4647895	4648563	PA4154|CDS|-	0	-	0
chromosome	4653904	4653914	PA0048_pwm	9.87288	+	4.31e-06	0.0355	CGGCCAGGCCG	chromosome	4654307	4654431	PA4159_promoter|siderophore	0	+	-394
chromosome	4653904	4653914	PA0048_pwm	9.87288	+	4.31e-06	0.0355	CGGCCAGGCCG	chromosome	4654307	4654431	PA4160_promoter|siderophore	0	+	-394
chromosome	4653904	4653914	PA0048_pwm	9.87288	+	4.31e-06	0.0355	CGGCCAGGCCG	chromosome	4654307	4654431	PA4161_promoter|siderophore	0	+	-394
chromosome	4655763	4655773	PA0048_pwm	9.87288	-	4.31e-06	0.0355	CGGCCAGGCCG	chromosome	4654307	4654431	PA4158_promoter|siderophore	0	-	-1333
chromosome	4658980	4658990	PA0048_pwm	9.87288	-	4.31e-06	0.0355	CGGCCAGGCCG	chromosome	4657429	4658145	PA4162|CDS|-	0	-	-836
chromosome	4690812	4690822	PA0048_pwm	9.87288	+	4.31e-06	0.0355	CGGCCAGGCCG	chromosome	4696281	4697903	PA4198|CDS|-	0	+	-5460
chromosome	4710677	4710687	PA0048_pwm	9.87288	-	4.31e-06	0.0355	CGGCCAGGCCG	chromosome	4702042	4703097	PA4202|CDS|nmoA	0	-	-7581
chromosome	4716791	4716801	PA0048_pwm	9.87288	-	4.31e-06	0.0355	CGGCCAGGCCG	chromosome	4713100	4713795	PA4209_promoter|QS	0	-	-2997
chromosome	4721820	4721830	PA0048_pwm	9.87288	-	4.31e-06	0.0355	CGGCCAGGCCG	chromosome	4721614	4722858	PA4218|CDS|ampP	0	-	0
chromosome	4732355	4732365	PA0048_pwm	9.87288	+	4.31e-06	0.0355	CGGCCAGGCCG	chromosome	4742424	4744067	PA4228|CDS|pchD	0	+	-10060
chromosome	4783057	4783067	PA0048_pwm	9.87288	+	4.31e-06	0.0355	TGGCCTGACCG	chromosome	4794404	4795633	PA4281|CDS|sbcD	0	+	-11338
chromosome	4811914	4811924	PA0048_pwm	9.87288	-	4.31e-06	0.0355	CGGCCAGGCCG	chromosome	4809547	4810437	PA4287|CDS|-	0	-	-1478
chromosome	4813545	4813555	PA0048_pwm	9.87288	+	4.31e-06	0.0355	CGGCCAGGCCG	chromosome	4814213	4814899	PA4291|CDS|-	0	+	-659
chromosome	4865054	4865064	PA0048_pwm	9.87288	+	4.31e-06	0.0355	CGGCCAGGCCG	chromosome	4878790	4879545	PA4350|CDS|olsB	0	+	-13727
chromosome	4869449	4869459	PA0048_pwm	9.87288	+	4.31e-06	0.0355	CGGCAAGGCCA	chromosome	4878790	4879545	PA4350|CDS|olsB	0	+	-9332
chromosome	4869696	4869706	PA0048_pwm	9.87288	+	4.31e-06	0.0355	CGGCAAGGCCA	chromosome	4878790	4879545	PA4350|CDS|olsB	0	+	-9085
chromosome	4930152	4930162	PA0048_pwm	9.87288	-	4.31e-06	0.0355	CGGCCAGGCCG	chromosome	4925316	4925795	PA4395|CDS|-	0	-	-4358
chromosome	4935929	4935939	PA0048_pwm	9.87288	-	4.31e-06	0.0355	CGGCCAGGCCG	chromosome	4933866	4936616	PA4403|CDS|secA	0	-	0
chromosome	4949604	4949614	PA0048_pwm	9.87288	-	4.31e-06	0.0355	CGGCCAGGCCG	chromosome	4948690	4949772	PA4415|CDS|mraY	0	-	0
chromosome	4975680	4975690	PA0048_pwm	9.87288	-	4.31e-06	0.0355	CGGCCAGGCCG	chromosome	4974694	4976595	PA4442|CDS|cysN	0	-	0
chromosome	5020174	5020184	PA0048_pwm	9.87288	-	4.31e-06	0.0355	CGGCCAGGCCG	chromosome	5018756	5020405	PA4488|CDS|magE	0	-	0
chromosome	5020626	5020636	PA0048_pwm	9.87288	+	4.31e-06	0.0355	CGGCCAGGCCG	chromosome	5030525	5031235	PA4495|CDS|-	0	+	-9890
chromosome	5021298	5021308	PA0048_pwm	9.87288	+	4.31e-06	0.0355	CGGCCAGGCCG	chromosome	5030525	5031235	PA4495|CDS|-	0	+	-9218
chromosome	5046377	5046387	PA0048_pwm	9.87288	+	4.31e-06	0.0355	CGGCAAGGCCA	chromosome	5046806	5047279	PA4508|CDS|-	0	+	-420
chromosome	5108111	5108121	PA0048_pwm	9.87288	-	4.31e-06	0.0355	CGGCCATGCCA	chromosome	5106951	5109782	PA4560|CDS|ileS	0	-	0
chromosome	5111128	5111138	PA0048_pwm	9.87288	+	4.31e-06	0.0355	CGGCCAGGCCG	chromosome	5112663	5112938	PA4563|CDS|rpsT	0	+	-1526
chromosome	5120697	5120707	PA0048_pwm	9.87288	-	4.31e-06	0.0355	CGGCCAGGCCG	chromosome	5120635	5121252	PA4572|CDS|fklB	0	-	0
chromosome	5128658	5128668	PA0048_pwm	9.87288	+	4.31e-06	0.0355	CGGCCAGGCCG	chromosome	5131082	5131155	PA4581.1|tRNA|tRNA-Arg	0	+	-2415
chromosome	5130594	5130604	PA0048_pwm	9.87288	+	4.31e-06	0.0355	CGGCCAGGCCG	chromosome	5131082	5131155	PA4581.1|tRNA|tRNA-Arg	0	+	-479
chromosome	5135444	5135454	PA0048_pwm	9.87288	+	4.31e-06	0.0355	CGGCCAGGCCG	chromosome	5134689	5135714	PA4585|CDS|rtcA	0	+	0
chromosome	5146007	5146017	PA0048_pwm	9.87288	+	4.31e-06	0.0355	CGGCCAGGCCG	chromosome	5149064	5149582	PA4596|CDS|esrC	0	+	-3048
chromosome	5163146	5163156	PA0048_pwm	9.87288	+	4.31e-06	0.0355	CGGCCAGGCCG	chromosome	5166698	5166899	PA4608_promoter|biofilm	0	+	-3543
chromosome	5203297	5203307	PA0048_pwm	9.87288	-	4.31e-06	0.0355	CGGCAAGGCCA	chromosome	5202628	5203242	PA4634|CDS|-	0	-	-56
chromosome	5203829	5203839	PA0048_pwm	9.87288	-	4.31e-06	0.0355	CGGCCAGGCCG	chromosome	5202628	5203242	PA4634|CDS|-	0	-	-588
chromosome	5211504	5211514	PA0048_pwm	9.87288	+	4.31e-06	0.0355	CGGCCAGGCCG	chromosome	5212833	5213471	PA4646|CDS|upp	0	+	-1320
chromosome	5213716	5213726	PA0048_pwm	9.87288	-	4.31e-06	0.0355	CGGCCAGGCCG	chromosome	5212107	5212664	PA4645|CDS|-	0	-	-1053
chromosome	5218345	5218355	PA0048_pwm	9.87288	+	4.31e-06	0.0355	CGGCCAGGCCG	chromosome	5217569	5219941	PA4652|CDS|cupE5	0	+	0
chromosome	5218345	5218355	PA0048_pwm	9.87288	+	4.31e-06	0.0355	CGGCCAGGCCG	chromosome	5217569	5219941	PA4652|motility	0	+	0
chromosome	5249433	5249443	PA0048_pwm	9.87288	-	4.31e-06	0.0355	CGGCCAGGCCG	chromosome	5249032	5249568	PA4680|CDS|-	0	-	0
chromosome	5286847	5286857	PA0048_pwm	9.87288	+	4.31e-06	0.0355	CGGCCAGGCCG	chromosome	5289037	5289216	PA4710_promoter|siderophore	0	+	-2181
chromosome	5295226	5295236	PA0048_pwm	9.87288	-	4.31e-06	0.0355	CGGCCAGGCCG	chromosome	5293765	5295000	PA4715|CDS|-	0	-	-227
chromosome	5328551	5328561	PA0048_pwm	9.87288	+	4.31e-06	0.0355	CGGCCAGGCCG	chromosome	5338618	5338932	PA4753|CDS|-	0	+	-10058
chromosome	5347160	5347170	PA0048_pwm	9.87288	-	4.31e-06	0.0355	CGGCCAGGCCG	chromosome	5347083	5347197	PA4760_promoter|SR and persisters	0	-	0
chromosome	5370595	5370605	PA0048_pwm	9.87288	-	4.31e-06	0.0355	CGGCAAGGCCA	chromosome	5370476	5370721	PA4782|CDS|-	0	-	0
chromosome	5397908	5397918	PA0048_pwm	9.87288	+	4.31e-06	0.0355	CGGCCAGGCCG	chromosome	5403305	5405350	PA4814|CDS|fadH2	0	+	-5388
chromosome	5471850	5471860	PA0048_pwm	9.87288	-	4.31e-06	0.0355	CGGCAAGGCCA	chromosome	5471626	5472042	PA4874|CDS|-	0	-	0
chromosome	5499666	5499676	PA0048_pwm	9.87288	+	4.31e-06	0.0355	CGGCCAGGCCG	chromosome	5500427	5501323	PA4902|CDS|-	0	+	-752
chromosome	5502465	5502475	PA0048_pwm	9.87288	+	4.31e-06	0.0355	CGGCCATGCCA	chromosome	5503051	5504106	PA4904|CDS|vanA	0	+	-577
chromosome	5503668	5503678	PA0048_pwm	9.87288	-	4.31e-06	0.0355	CGGCCAGGCCG	chromosome	5501338	5502672	PA4903|CDS|-	0	-	-997
chromosome	5530521	5530531	PA0048_pwm	9.87288	+	4.31e-06	0.0355	CGGCCAGGCCG	chromosome	5530973	5533015	PA4929|CDS|-	0	+	-443
chromosome	5540840	5540850	PA0048_pwm	9.87288	-	4.31e-06	0.0355	CGGCAAGGCCA	chromosome	5538696	5541410	PA4937|CDS|rnr	0	-	0
chromosome	5567780	5567790	PA0048_pwm	9.87288	+	4.31e-06	0.0355	CGGCCAGGCCG	chromosome	5569090	5570628	PA4961|CDS|-	0	+	-1301
chromosome	5592465	5592475	PA0048_pwm	9.87288	-	4.31e-06	0.0355	CGGCAAGGCCA	chromosome	5591452	5592612	PA4979|CDS|-	0	-	0
chromosome	5606813	5606823	PA0048_pwm	9.87288	-	4.31e-06	0.0355	CGGCCAGGCCG	chromosome	5605134	5606018	PA4989|CDS|-	0	-	-796
chromosome	5607715	5607725	PA0048_pwm	9.87288	-	4.31e-06	0.0355	CGGCCAGGCCG	chromosome	5605134	5606018	PA4989|CDS|-	0	-	-1698
chromosome	5639338	5639348	PA0048_pwm	9.87288	+	4.31e-06	0.0355	CGGCAAGGCCA	chromosome	5638949	5640592	PA5016|CDS|aceF	0	+	0
chromosome	5656965	5656975	PA0048_pwm	9.87288	-	4.31e-06	0.0355	CGGCCAGGCCG	chromosome	5644454	5645290	PA5019|CDS|-	0	-	-11676
chromosome	5660806	5660816	PA0048_pwm	9.87288	-	4.31e-06	0.0355	CGGCCAGGCCG	chromosome	5660182	5660356	PA5028_promoter|antibiotic resistance	0	-	-451
chromosome	5708277	5708287	PA0048_pwm	9.87288	-	4.31e-06	0.0355	CGGCAAGGCCA	chromosome	5702258	5702533	PA5062|CDS|-	0	-	-5745
chromosome	5714491	5714501	PA0048_pwm	9.87288	-	4.31e-06	0.0355	CGGCAAGGCCA	chromosome	5714270	5716855	PA5077|CDS|opgH	0	-	0
chromosome	5728694	5728704	PA0048_pwm	9.87288	-	4.31e-06	0.0355	CGGCCAGGCCG	chromosome	5727239	5729476	PA5089|CDS|tle5b	0	-	0
chromosome	5728694	5728704	PA0048_pwm	9.87288	-	4.31e-06	0.0355	CGGCCAGGCCG	chromosome	5727239	5729476	PA5089|T6SS	0	-	0
chromosome	5730615	5730625	PA0048_pwm	9.87288	-	4.31e-06	0.0355	CGGCCAGGCCG	chromosome	5729473	5731845	PA5090|CDS|vgrG5	0	-	0
chromosome	5730615	5730625	PA0048_pwm	9.87288	-	4.31e-06	0.0355	CGGCCAGGCCG	chromosome	5729473	5731845	PA5090|T6SS	0	-	0
chromosome	5755419	5755429	PA0048_pwm	9.87288	+	4.31e-06	0.0355	CGGCCAGGCCG	chromosome	5762150	5762575	PA5116|CDS|-	0	+	-6722
chromosome	5758883	5758893	PA0048_pwm	9.87288	+	4.31e-06	0.0355	CGGCCAGGCCG	chromosome	5762150	5762575	PA5116|CDS|-	0	+	-3258
chromosome	5805849	5805859	PA0048_pwm	9.87288	-	4.31e-06	0.0355	CGGCCAGGCCG	chromosome	5798693	5799430	PA5150|CDS|-	0	-	-6420
chromosome	5812699	5812709	PA0048_pwm	9.87288	+	4.31e-06	0.0355	CGGCAAGGCCA	chromosome	5812241	5813122	PA5163|CDS|rmlA	0	+	0
chromosome	5821602	5821612	PA0048_pwm	9.87288	+	4.31e-06	0.0355	CGGCAAGGCCA	chromosome	5820910	5822358	PA5170|CDS|arcD	0	+	0
chromosome	5830977	5830987	PA0048_pwm	9.87288	+	4.31e-06	0.0355	CGGCCAGGCCG	chromosome	5830924	5831805	PA5179|CDS|-	0	+	0
chromosome	5834620	5834630	PA0048_pwm	9.87288	+	4.31e-06	0.0355	CGGCAAGGCCA	chromosome	5832749	5835070	PA5181|CDS|-	0	+	0
chromosome	5864232	5864242	PA0048_pwm	9.87288	+	4.31e-06	0.0355	CGGCAAGGCCA	chromosome	5863825	5865189	PA5209|CDS|-	0	+	0
chromosome	5884726	5884736	PA0048_pwm	9.87288	+	4.31e-06	0.0355	CGGCAAGGCCA	chromosome	5884508	5885119	PA5228|CDS|-	0	+	0
chromosome	5884726	5884736	PA0048_pwm	9.87288	+	4.31e-06	0.0355	CGGCAAGGCCA	chromosome	5884508	5885119	PA5228|SR and persisters	0	+	0
chromosome	5890921	5890931	PA0048_pwm	9.87288	+	4.31e-06	0.0355	CGGCCAGGCCG	chromosome	5891683	5892660	PA5234|CDS|-	0	+	-753
chromosome	5892159	5892169	PA0048_pwm	9.87288	+	4.31e-06	0.0355	CGGCAAGGCCA	chromosome	5891683	5892660	PA5234|CDS|-	0	+	0
chromosome	5967125	5967135	PA0048_pwm	9.87288	+	4.31e-06	0.0355	CGGCCAGGCCG	chromosome	5966706	5967278	PA5298|CDS|-	0	+	0
chromosome	5991575	5991585	PA0048_pwm	9.87288	+	4.31e-06	0.0355	CGGCCAGGCCG	chromosome	5991168	5993774	PA5322|CDS|algC	0	+	0
chromosome	6037894	6037904	PA0048_pwm	9.87288	+	4.31e-06	0.0355	CGGCCAGGCCG	chromosome	6046914	6047318	PA5371|CDS|-	0	+	-9011
chromosome	6065879	6065889	PA0048_pwm	9.87288	+	4.31e-06	0.0355	CGGCCAGGCCG	chromosome	6067005	6068015	PA5389|CDS|cdhR	0	+	-1117
chromosome	6066572	6066582	PA0048_pwm	9.87288	+	4.31e-06	0.0355	CGGCCAGGCCG	chromosome	6067005	6068015	PA5389|CDS|cdhR	0	+	-424
chromosome	6071528	6071538	PA0048_pwm	9.87288	-	4.31e-06	0.0355	CGGCCAGGCCG	chromosome	6070266	6071618	PA5393|CDS|-	0	-	0
chromosome	6078868	6078878	PA0048_pwm	9.87288	-	4.31e-06	0.0355	CGGCCAGGCCG	chromosome	6071912	6073384	PA5394|CDS|cls	0	-	-5485
chromosome	6081757	6081767	PA0048_pwm	9.87288	-	4.31e-06	0.0355	CGGCCAGGCCG	chromosome	6071912	6073384	PA5394|CDS|cls	0	-	-8374
chromosome	6093665	6093675	PA0048_pwm	9.87288	+	4.31e-06	0.0355	CGGCAAGGCCA	chromosome	6094024	6095277	PA5415|CDS|glyA1	0	+	-350
chromosome	6097566	6097576	PA0048_pwm	9.87288	-	4.31e-06	0.0355	CGGCCAGGCCG	chromosome	6093167	6093808	PA5414|CDS|-	0	-	-3759
chromosome	6102285	6102295	PA0048_pwm	9.87288	+	4.31e-06	0.0355	CGGCCAGGCCG	chromosome	6101884	6103083	PA5421|CDS|fdhA	0	+	0
chromosome	6102477	6102487	PA0048_pwm	9.87288	-	4.31e-06	0.0355	CGGCCAGGCCG	chromosome	6093167	6093808	PA5414|CDS|-	0	-	-8670
chromosome	6111305	6111315	PA0048_pwm	9.87288	+	4.31e-06	0.0355	CGGCCAGGCCG	chromosome	6113902	6114351	PA5432|CDS|-	0	+	-2588
chromosome	6146750	6146760	PA0048_pwm	9.87288	-	4.31e-06	0.0355	CGGCCAGGCCG	chromosome	6144077	6144991	PA5454|CDS|rmd	0	-	-1760
chromosome	6155624	6155634	PA0048_pwm	9.87288	-	4.31e-06	0.0355	CGGCCAGGCCG	chromosome	6154784	6155203	PA5465|CDS|-	0	-	-422
chromosome	6174325	6174335	PA0048_pwm	9.87288	-	4.31e-06	0.0355	CGGCCAGGCCG	chromosome	6172712	6172873	PA5482|CDS|-	0	-	-1453
chromosome	6211804	6211814	PA0048_pwm	9.87288	-	4.31e-06	0.0355	CGGCCAGGCCG	chromosome	6210065	6211768	PA5518|CDS|-	0	-	-37
chromosome	6213107	6213117	PA0048_pwm	9.87288	+	4.31e-06	0.0355	CGGCAAGGCCA	chromosome	6212790	6213533	PA5520|CDS|-	0	+	0
chromosome	6236313	6236323	PA0048_pwm	9.87288	+	4.31e-06	0.0355	CGGCAAGGCCA	chromosome	6240870	6241493	PA5547|CDS|-	0	+	-4548
chromosome	24997	25007	PA0048_pwm	9.84746	+	5.48e-06	0.0415	CTGCCTGGCCA	chromosome	25736	26653	PA0024|CDS|hemF	0	+	-730
chromosome	147251	147261	PA0048_pwm	9.84746	+	5.48e-06	0.0415	TGGCATGGCCG	chromosome	150906	151823	PA0133|CDS|bauR	0	+	-3646
chromosome	183544	183554	PA0048_pwm	9.84746	-	5.48e-06	0.0415	TGGCATGGCCG	chromosome	165219	165737	PA0145|CDS|-	0	-	-17808
chromosome	286686	286696	PA0048_pwm	9.84746	+	5.48e-06	0.0415	TGGCCAGACCG	chromosome	299522	300973	PA0265|CDS|davD	0	+	-12827
chromosome	332136	332146	PA0048_pwm	9.84746	-	5.48e-06	0.0415	CTGCCTGGCCA	chromosome	331762	332823	PA0295|CDS|-	0	-	0
chromosome	402064	402074	PA0048_pwm	9.84746	-	5.48e-06	0.0415	TGGCATGGCCG	chromosome	400033	400247	PA0355_promoter|antibiotic resistance	0	-	-1818
chromosome	493053	493063	PA0048_pwm	9.84746	-	5.48e-06	0.0415	TGGCCAGACCG	chromosome	492080	493357	PA0439|CDS|-	0	-	0
chromosome	501939	501949	PA0048_pwm	9.84746	-	5.48e-06	0.0415	CTGCCTGGCCA	chromosome	501376	502599	PA0446|CDS|-	0	-	0
chromosome	624899	624909	PA0048_pwm	9.84746	+	5.48e-06	0.0415	TGGCATGGCCG	chromosome	639316	640341	PA0580|CDS|gcp	0	+	-14408
chromosome	646320	646330	PA0048_pwm	9.84746	+	5.48e-06	0.0415	TGGCCTTGCCG	chromosome	656654	657670	PA0596|CDS|-	0	+	-10325
chromosome	881121	881131	PA0048_pwm	9.84746	+	5.48e-06	0.0415	CTGCCTGGCCA	chromosome	881077	881400	PA0802|CDS|-	0	+	0
chromosome	905046	905056	PA0048_pwm	9.84746	+	5.48e-06	0.0415	TGGCCTTGCCG	chromosome	905726	906745	PA0831|CDS|oruR	0	+	-671
chromosome	949639	949649	PA0048_pwm	9.84746	-	5.48e-06	0.0415	TGGCCTTGCCG	chromosome	944724	945512	PA0864|CDS|-	0	-	-4128
chromosome	1022871	1022881	PA0048_pwm	9.84746	-	5.48e-06	0.0415	CTGCCTGGCCA	chromosome	1015753	1015937	PA0926_promoter|antibiotic resistance	0	-	-6935
chromosome	1022871	1022881	PA0048_pwm	9.84746	-	5.48e-06	0.0415	CTGCCTGGCCA	chromosome	1015753	1015937	PA0928_promoter|biofilm	0	-	-6935
chromosome	1022871	1022881	PA0048_pwm	9.84746	-	5.48e-06	0.0415	CTGCCTGGCCA	chromosome	1015753	1015937	PA0928_promoter|motility	0	-	-6935
chromosome	1022871	1022881	PA0048_pwm	9.84746	-	5.48e-06	0.0415	CTGCCTGGCCA	chromosome	1015753	1015937	PA0928_promoter|QS	0	-	-6935
chromosome	1022871	1022881	PA0048_pwm	9.84746	-	5.48e-06	0.0415	CTGCCTGGCCA	chromosome	1015753	1015937	PA0928_promoter|T3SS	0	-	-6935
chromosome	1022871	1022881	PA0048_pwm	9.84746	-	5.48e-06	0.0415	CTGCCTGGCCA	chromosome	1015753	1015937	PA0928_promoter|T6SS	0	-	-6935
chromosome	1024318	1024328	PA0048_pwm	9.84746	-	5.48e-06	0.0415	TGGCATGGCCG	chromosome	1015753	1015937	PA0926_promoter|antibiotic resistance	0	-	-8382
chromosome	1024318	1024328	PA0048_pwm	9.84746	-	5.48e-06	0.0415	TGGCATGGCCG	chromosome	1015753	1015937	PA0928_promoter|biofilm	0	-	-8382
chromosome	1024318	1024328	PA0048_pwm	9.84746	-	5.48e-06	0.0415	TGGCATGGCCG	chromosome	1015753	1015937	PA0928_promoter|motility	0	-	-8382
chromosome	1024318	1024328	PA0048_pwm	9.84746	-	5.48e-06	0.0415	TGGCATGGCCG	chromosome	1015753	1015937	PA0928_promoter|QS	0	-	-8382
chromosome	1024318	1024328	PA0048_pwm	9.84746	-	5.48e-06	0.0415	TGGCATGGCCG	chromosome	1015753	1015937	PA0928_promoter|T3SS	0	-	-8382
chromosome	1024318	1024328	PA0048_pwm	9.84746	-	5.48e-06	0.0415	TGGCATGGCCG	chromosome	1015753	1015937	PA0928_promoter|T6SS	0	-	-8382
chromosome	1149838	1149848	PA0048_pwm	9.84746	-	5.48e-06	0.0415	CTGCCTGGCCA	chromosome	1128857	1129321	PA1044|CDS|-	0	-	-20518
chromosome	1186779	1186789	PA0048_pwm	9.84746	-	5.48e-06	0.0415	TGGCCTTGCCG	chromosome	1161856	1162977	PA1074|CDS|braC	0	-	-23803
chromosome	1201406	1201416	PA0048_pwm	9.84746	+	5.48e-06	0.0415	TGGCATTGCCA	chromosome	1201310	1202089	PA1109|CDS|-	0	+	0
chromosome	1222103	1222113	PA0048_pwm	9.84746	+	5.48e-06	0.0415	TGGCCTTGCCG	chromosome	1224641	1225330	PA1132|CDS|-	0	+	-2529
chromosome	1230491	1230501	PA0048_pwm	9.84746	+	5.48e-06	0.0415	TGGCCTTGCCG	chromosome	1230310	1231158	PA1139|CDS|-	0	+	0
chromosome	1268843	1268853	PA0048_pwm	9.84746	+	5.48e-06	0.0415	CTGCCTGGCCA	chromosome	1267680	1269737	PA1169|CDS|-	0	+	0
chromosome	1323101	1323111	PA0048_pwm	9.84746	+	5.48e-06	0.0415	TGGCCTTGCCG	chromosome	1327024	1327803	PA1224|CDS|-	0	+	-3914
chromosome	1400286	1400296	PA0048_pwm	9.84746	+	5.48e-06	0.0415	TGGCCAGACCG	chromosome	1402117	1402956	PA1291|CDS|-	0	+	-1822
chromosome	1436310	1436320	PA0048_pwm	9.84746	+	5.48e-06	0.0415	TGGCAAGACCA	chromosome	1435885	1436397	PA1324|CDS|-	0	+	0
chromosome	1550776	1550786	PA0048_pwm	9.84746	-	5.48e-06	0.0415	TGGCCAGACCG	chromosome	1548334	1549587	PA1423|CDS|bdlA	0	-	-1190
chromosome	1625383	1625393	PA0048_pwm	9.84746	-	5.48e-06	0.0415	CTGCCTGGCCA	chromosome	1624781	1625695	PA1497|CDS|-	0	-	0
chromosome	1672091	1672101	PA0048_pwm	9.84746	+	5.48e-06	0.0415	TGGCATGGCCG	chromosome	1672080	1672406	PA1533|CDS|-	0	+	0
chromosome	1734126	1734136	PA0048_pwm	9.84746	+	5.48e-06	0.0415	CTGCCTGGCCA	chromosome	1734004	1734768	PA1591|CDS|-	0	+	0
chromosome	1752456	1752466	PA0048_pwm	9.84746	-	5.48e-06	0.0415	CTGCCTGGCCA	chromosome	1751674	1752891	PA1609|CDS|fabB	0	-	0
chromosome	1791397	1791407	PA0048_pwm	9.84746	+	5.48e-06	0.0415	TGGCATGGCCG	chromosome	1791080	1793038	PA1646|CDS|-	0	+	0
chromosome	1821548	1821558	PA0048_pwm	9.84746	-	5.48e-06	0.0415	TGGCCTTGCCG	chromosome	1800071	1800547	PA1653|CDS|-	0	-	-21002
chromosome	1841453	1841463	PA0048_pwm	9.84746	+	5.48e-06	0.0415	TGGCCTTGCCG	chromosome	1847037	1847226	PA1698_promoter|T3SS	0	+	-5575
chromosome	1841453	1841463	PA0048_pwm	9.84746	+	5.48e-06	0.0415	TGGCCTTGCCG	chromosome	1847037	1847226	PA1699_promoter|T3SS	0	+	-5575
chromosome	1841453	1841463	PA0048_pwm	9.84746	+	5.48e-06	0.0415	TGGCCTTGCCG	chromosome	1847037	1847226	PA1700_promoter|T3SS	0	+	-5575
chromosome	1841453	1841463	PA0048_pwm	9.84746	+	5.48e-06	0.0415	TGGCCTTGCCG	chromosome	1847037	1847226	PA1702_promoter|T3SS	0	+	-5575
chromosome	1841453	1841463	PA0048_pwm	9.84746	+	5.48e-06	0.0415	TGGCCTTGCCG	chromosome	1847037	1847226	PA1703_promoter|T3SS	0	+	-5575
chromosome	1841453	1841463	PA0048_pwm	9.84746	+	5.48e-06	0.0415	TGGCCTTGCCG	chromosome	1847037	1847226	PA1704_promoter|T3SS	0	+	-5575
chromosome	1841453	1841463	PA0048_pwm	9.84746	+	5.48e-06	0.0415	TGGCCTTGCCG	chromosome	1847037	1847226	PA1705_promoter|T3SS	0	+	-5575
chromosome	1841453	1841463	PA0048_pwm	9.84746	+	5.48e-06	0.0415	TGGCCTTGCCG	chromosome	1847037	1847226	PA1706_promoter|T3SS	0	+	-5575
chromosome	1841453	1841463	PA0048_pwm	9.84746	+	5.48e-06	0.0415	TGGCCTTGCCG	chromosome	1847037	1847226	PA1707_promoter|T3SS	0	+	-5575
chromosome	1841453	1841463	PA0048_pwm	9.84746	+	5.48e-06	0.0415	TGGCCTTGCCG	chromosome	1847037	1847226	PA1708_promoter|T3SS	0	+	-5575
chromosome	1841453	1841463	PA0048_pwm	9.84746	+	5.48e-06	0.0415	TGGCCTTGCCG	chromosome	1847037	1847226	PA1709_promoter|T3SS	0	+	-5575
chromosome	1855283	1855293	PA0048_pwm	9.84746	-	5.48e-06	0.0415	TGGCCTTGCCG	chromosome	1847037	1847226	PA1690_promoter|T3SS	0	-	-8058
chromosome	1855283	1855293	PA0048_pwm	9.84746	-	5.48e-06	0.0415	TGGCCTTGCCG	chromosome	1847037	1847226	PA1691_promoter|T3SS	0	-	-8058
chromosome	1855283	1855293	PA0048_pwm	9.84746	-	5.48e-06	0.0415	TGGCCTTGCCG	chromosome	1847037	1847226	PA1692_promoter|T3SS	0	-	-8058
chromosome	1855283	1855293	PA0048_pwm	9.84746	-	5.48e-06	0.0415	TGGCCTTGCCG	chromosome	1847037	1847226	PA1693_promoter|T3SS	0	-	-8058
chromosome	1855283	1855293	PA0048_pwm	9.84746	-	5.48e-06	0.0415	TGGCCTTGCCG	chromosome	1847037	1847226	PA1694_promoter|T3SS	0	-	-8058
chromosome	1855283	1855293	PA0048_pwm	9.84746	-	5.48e-06	0.0415	TGGCCTTGCCG	chromosome	1847037	1847226	PA1695_promoter|T3SS	0	-	-8058
chromosome	1855283	1855293	PA0048_pwm	9.84746	-	5.48e-06	0.0415	TGGCCTTGCCG	chromosome	1847037	1847226	PA1696_promoter|T3SS	0	-	-8058
chromosome	1855283	1855293	PA0048_pwm	9.84746	-	5.48e-06	0.0415	TGGCCTTGCCG	chromosome	1847037	1847226	PA1697_promoter|T3SS	0	-	-8058
chromosome	1899490	1899500	PA0048_pwm	9.84746	+	5.48e-06	0.0415	TGGCCAGACCG	chromosome	1898816	1901521	PA1759|CDS|-	0	+	0
chromosome	1910120	1910130	PA0048_pwm	9.84746	+	5.48e-06	0.0415	TGGCCTTGCCG	chromosome	1914037	1916412	PA1770|CDS|ppsA	0	+	-3908
chromosome	1965087	1965097	PA0048_pwm	9.84746	-	5.48e-06	0.0415	TGGCCTTGCCG	chromosome	1964682	1965764	PA1809|CDS|nppB	0	-	0
chromosome	1987570	1987580	PA0048_pwm	9.84746	+	5.48e-06	0.0415	TGGCCTTGCCG	chromosome	1990428	1991453	PA1832|CDS|-	0	+	-2849
chromosome	2006449	2006459	PA0048_pwm	9.84746	+	5.48e-06	0.0415	TGGCCTTGCCG	chromosome	2005254	2007542	PA1846|CDS|cti	0	+	0
chromosome	2018970	2018980	PA0048_pwm	9.84746	-	5.48e-06	0.0415	CTGCCTGGCCA	chromosome	2018803	2019690	PA1859|CDS|-	0	-	0
chromosome	2145826	2145836	PA0048_pwm	9.84746	+	5.48e-06	0.0415	TGGCCTTGCCG	chromosome	2145894	2146502	PA1962|CDS|azoR2	0	+	-59
chromosome	2411313	2411323	PA0048_pwm	9.84746	+	5.48e-06	0.0415	CTGCCTGGCCA	chromosome	2411709	2412122	PA2192|CDS|-	0	+	-387
chromosome	2472328	2472338	PA0048_pwm	9.84746	+	5.48e-06	0.0415	TGGCCTTGCCG	chromosome	2472104	2472409	PA2245|biofilm	0	+	0
chromosome	2472328	2472338	PA0048_pwm	9.84746	+	5.48e-06	0.0415	TGGCCTTGCCG	chromosome	2472104	2472409	PA2245|CDS|pslO	0	+	0
chromosome	2493310	2493320	PA0048_pwm	9.84746	-	5.48e-06	0.0415	TGGCATGGCCG	chromosome	2487294	2487855	PA2258_promoter|QS	0	-	-5456
chromosome	2675823	2675833	PA0048_pwm	9.84746	-	5.48e-06	0.0415	TGGCAAGACCA	chromosome	2671729	2687178	PA2402|CDS|-	0	-	0
chromosome	2738008	2738018	PA0048_pwm	9.84746	-	5.48e-06	0.0415	TGGCCTTGCCG	chromosome	2735194	2737194	PA2439|CDS|-	0	-	-815
chromosome	2748413	2748423	PA0048_pwm	9.84746	+	5.48e-06	0.0415	CTGCCTGGCCA	chromosome	2748378	2750120	PA2448|CDS|-	0	+	0
chromosome	2764446	2764456	PA0048_pwm	9.84746	-	5.48e-06	0.0415	TGGCAAGACCA	chromosome	2761921	2778804	PA2462|CDS|-	0	-	0
chromosome	2773365	2773375	PA0048_pwm	9.84746	+	5.48e-06	0.0415	TGGCCTTGCCG	chromosome	2788011	2789072	PA2470|CDS|gtdA	0	+	-14637
chromosome	2831208	2831218	PA0048_pwm	9.84746	-	5.48e-06	0.0415	TGGCATGGCCG	chromosome	2829124	2829439	PA2511_promoter|QS	0	-	-1770
chromosome	2889655	2889665	PA0048_pwm	9.84746	-	5.48e-06	0.0415	TGGCCTTGCCG	chromosome	2889202	2890287	PA2556|CDS|-	0	-	0
chromosome	2940636	2940646	PA0048_pwm	9.84746	-	5.48e-06	0.0415	TGGCCTTGCCG	chromosome	2939646	2940797	PA2597|CDS|-	0	-	0
chromosome	3113802	3113812	PA0048_pwm	9.84746	+	5.48e-06	0.0415	TGGCCTTGCCG	chromosome	3114819	3115193	PA2753|CDS|-	0	+	-1008
chromosome	3241205	3241215	PA0048_pwm	9.84746	-	5.48e-06	0.0415	TGGCCTTGCCG	chromosome	3236959	3237555	PA2885|CDS|atuR	0	-	-3651
chromosome	3303890	3303900	PA0048_pwm	9.84746	-	5.48e-06	0.0415	CTGCCTGGCCA	chromosome	3300615	3304361	PA2944|CDS|cobN	0	-	0
chromosome	3315043	3315053	PA0048_pwm	9.84746	+	5.48e-06	0.0415	TGGCCTTGCCG	chromosome	3317524	3318657	PA2958|CDS|-	0	+	-2472
chromosome	3340512	3340522	PA0048_pwm	9.84746	+	5.48e-06	0.0415	TGGCCAGACCG	chromosome	3343178	3343711	PA2985|CDS|-	0	+	-2657
chromosome	3405869	3405879	PA0048_pwm	9.84746	-	5.48e-06	0.0415	TGGCCTTGCCG	chromosome	3402134	3403516	PA3039|CDS|-	0	-	-2354
chromosome	3449379	3449389	PA0048_pwm	9.84746	+	5.48e-06	0.0415	CTGCCTGGCCA	chromosome	3448012	3449643	PA3075|CDS|-	0	+	0
chromosome	3510650	3510660	PA0048_pwm	9.84746	-	5.48e-06	0.0415	TGGCCAGACCG	chromosome	3508717	3509166	PA3126|CDS|ibpA	0	-	-1485
chromosome	3547541	3547551	PA0048_pwm	9.84746	+	5.48e-06	0.0415	TGGCAAGACCA	chromosome	3560621	3561955	PA3170|CDS|-	0	+	-13071
chromosome	3598934	3598944	PA0048_pwm	9.84746	+	5.48e-06	0.0415	TGGCCTTGCCG	chromosome	3598933	3600387	PA3210|CDS|trkH	0	+	0
chromosome	3621966	3621976	PA0048_pwm	9.84746	+	5.48e-06	0.0415	TGGCCTTGCCG	chromosome	3624837	3625058	PA3237|CDS|-	0	+	-2862
chromosome	3690015	3690025	PA0048_pwm	9.84746	-	5.48e-06	0.0415	TGGCCTTGCCG	chromosome	3688879	3689316	PA3295|CDS|-	0	-	-700
chromosome	3696809	3696819	PA0048_pwm	9.84746	-	5.48e-06	0.0415	CTGCCTGGCCA	chromosome	3695511	3697199	PA3299|CDS|fadD1	0	-	0
chromosome	3721679	3721689	PA0048_pwm	9.84746	-	5.48e-06	0.0415	TGGCAAGACCA	chromosome	3720681	3722759	PA3319|CDS|plcN	0	-	0
chromosome	3729475	3729485	PA0048_pwm	9.84746	-	5.48e-06	0.0415	CTGCCTGGCCA	chromosome	3729471	3730076	PA3326|CDS|clpP2	0	-	0
chromosome	3738553	3738563	PA0048_pwm	9.84746	+	5.48e-06	0.0415	CTGCCTGGCCA	chromosome	3737612	3738778	PA3328|CDS|-	0	+	0
chromosome	3905386	3905396	PA0048_pwm	9.84746	-	5.48e-06	0.0415	TGGCCTTGCCG	chromosome	3894099	3895193	PA3481|CDS|-	0	-	-10194
chromosome	3940554	3940564	PA0048_pwm	9.84746	+	5.48e-06	0.0415	CTGCCTGGCCA	chromosome	3944184	3944570	PA3524|CDS|gloA1	0	+	-3621
chromosome	3993703	3993713	PA0048_pwm	9.84746	-	5.48e-06	0.0415	CTGCCTGGCCA	chromosome	3991541	3994411	PA3562|CDS|fruI	0	-	0
chromosome	4046827	4046837	PA0048_pwm	9.84746	-	5.48e-06	0.0415	CTGCCTGGCCA	chromosome	4045934	4048339	PA3613|CDS|-	0	-	0
chromosome	4080559	4080569	PA0048_pwm	9.84746	-	5.48e-06	0.0415	TGGCATGGCCG	chromosome	4080440	4081045	PA3642|CDS|rnhB	0	-	0
chromosome	4158475	4158485	PA0048_pwm	9.84746	-	5.48e-06	0.0415	TGGCATGGCCG	chromosome	4157126	4157821	PA3712|CDS|-	0	-	-655
chromosome	4198482	4198492	PA0048_pwm	9.84746	+	5.48e-06	0.0415	TGGCCTTGCCG	chromosome	4198843	4199643	PA3747|CDS|-	0	+	-352
chromosome	4262894	4262904	PA0048_pwm	9.84746	+	5.48e-06	0.0415	CTGCCTGGCCA	chromosome	4274351	4274501	PA3818_promoter|biofilm	0	+	-11448
chromosome	4262894	4262904	PA0048_pwm	9.84746	+	5.48e-06	0.0415	CTGCCTGGCCA	chromosome	4274351	4274501	PA3818_promoter|T3SS	0	+	-11448
[truncated: 31,828 more rows]
