# Supplementary material for: An atlas of the binding specificities of transcription factors in Pseudomonas aeruginosa directs prediction of novel regulators in virulence
Source: eLife. 2021 Mar 29;10:e61885. doi: 10.7554/eLife.61885 (PMC8041468; doi:10.7554/eLife.61885)
Supplement: Supplementary file 5. [file elife-61885-supp5.xlsx]

## Sheet: Supplementary File 5
Supplementary File 5. List of TFs associated with 9 known virulence pathways.
Column A, Line 5 to 70: TFs related to biofilm
Column B, Line 5 to 62: TFs related to QS
Column C, Line 5 to 50: TFs related to T6SS
Column D, Line 5 to 50: TFs related to motility
Column E, Line 5 to 95: TFs related to antibiotic resistance
Column F, Line 5 to 62: TFs related to Siderophore
Column G, Line 5 to 39: TFs related to T3SS
Column H, Line 5 to 30: TFs related to ROS
Column I, Line 5 to 24: TFs related to SR
Biofilm	QS	T6SS	Motility (Figure 2-figure supplement 6 A)	Antibiotic Resistance (Figure 2-figure supplement 7, Figure 2-figure supplement 8)	Siderophore (Figure 2-figure supplement 9)	T3SS (Figure 2-figure supplement 10)	ROS (Figure 2-figure supplement 10)	SR (Figure 2-figure supplement 10)
PA5293	PA3782	PA5293	PA0120	PA0048	PA0120	PA5293	PA5293	PA2479
PA4984	PA3341	PA4508	PA0236	PA0120	PA0236	PA4659	PA4983	PA1603
PA4906	PA3034	PA4032	PA0491	PA0191	PA0477	PA4032	PA4906	PA1520
PA4659	PA2879	PA3782	PA0528	PA0225	PA0491	PA3782	PA4659	PA1235
PA4032	PA2758	PA3249	PA0791	PA0236	PA0929	PA3249	PA3594	PA0791
PA3782	PA2681	PA3225	PA0864	PA0436	PA1201	PA3225	PA2534	PA0708
PA3458	PA2588	PA3034	PA1145	PA0477	PA1235	PA2879	PA1526	PA0120
PA3249	PA2534	PA2879	PA1235	PA0479	PA1241	PA2534	PA1437	PA0048
PA3225	PA2497	PA2588	PA1241	PA0491	PA1315	PA2479	PA1235	MexT
PA3034	PA2479	PA2334	PA1399	PA0547	PA1413	PA2028	PA0708	DauR
PA2879	PA2359	PA2028	PA1437	PA0564	PA1437	PA1437	PA0120	CpxR
PA2681	PA2334	PA1630	PA1490	PA0708	PA1490	PA1315	FleR
PA2588	PA2206	PA1437	PA1630	PA0739	PA1526	PA1235	DauR
PA2479	PA1864	PA1315	PA1864	PA0791	PA1599	PA0784	CpxR
PA2354	PA1627	PA1241	PA2534	PA0828	PA1713	PA0491	AguR
PA2334	PA1437	PA0791	PA2681	PA0839	PA1864	PA0120	SphR
PA2121	PA1413	PA0784	PA2879	PA1145	PA2267	PA0032	SouR
PA2118	PA1315	PA0708	PA3458	PA1201	PA2376	NagR
PA2028	PA1241	PA0535	PA3594	PA1226	PA2469	MexT
PA1864	PA1235	PA0528	PA3782	PA1241	PA2479	GacA
PA1599	PA1145	PA0268	PA4508	PA1269	PA2489	FleR
PA1437	PA0864	PA0120	PA4659	PA1315	PA2534	CreB
PA1399	PA0791	PA0048	PilR	PA1399	PA2681	CprR
PA1315	PA0547	PA0032	RpoN	PA1437	PA2838	AlpR
PA1269	PA0491	NagR	SphR	PA1520	PA2846	AguR
PA1241	PA0479	MexT	AguR	PA1599	PA2879	PhoB
PA1235	PA0236	GntR	AmrZ	PA1603	PA3135
PA0864	PA0225	GacA	EraR	PA1627	PA3398
PA0839	PA0181	CprR	FleQ	PA1630	PA3594
PA0791	PA0120	CbrB	GacA	PA1826	PA3771
PA0784	PA0048	AmrZ	GltR	PA1864	PA3782
PA0547	NagR	AguR	MexT	PA2100	PA4101
PA0491	MexT	SphR	NagR	PA2121	PA4135
PA0236	FleR	SouR	RsaL	PA2206	PA4436
PA0225	FleQ	RsaL	CatR	PA2267	PA4659
PA0191	EraR	PtxS	SouR	PA2359	PA4989
PA0120	DdaR	PhoB	CdpR	PA2376	SphR
PA0048	CreB			PA2383	AlgR
PA0032	CprR			PA2489	CatR
NagR	CatR			PA2497	DdaR
GacA	AlpR			PA2588	KdpE
FleQ	AguR			PA2681	PtxS
EraR	XylS			PA2758	GacA
CreB	SouR			PA2838	CprR
CprR	RsaL			PA2877	SawR
BqsR	RpoN			PA2879	GltR
AmrZ	PsrA			PA3135	AmrZ
AlgB	PilR			PA3341	NagR
SphR	PhoB			PA3458	SouR
PhoB				PA3771
FleR				PA3782
MexT				PA3895
CatR				PA4135
SouR				PA4288
RpoN				PA4659
PilR				PA4906
RsaL				PA4983
				PA4987
				PA5059
				PA5293
				PhoB
				PilR
				RpoN
				SawR
				SouR
				SphR
				XylS
				AguR
				AlgR
				AlpR
				AmgR
				AmrZ
				CatR
				CpxR
				DauR
				EraR
				FleR
				GfnR
				KdpE
				MvaT
				NagR
				NfxB
